# Supplementary material for: In Planta Transcriptome and Proteome Profiles of Spongospora subterranea in Resistant and Susceptible Host Environments Illuminates Regulatory Principles Underlying Host–Pathogen Interaction
Source: MDPI journal article supplement (doi:10.3390/biology10090840), 2021-08-28
Supplement: s1 [file s1]

**Table S5-** List of proteins identified in both transcriptome and proteome analysis

| No. | Accession Number | Annotation                                            |
|-----|------------------|-------------------------------------------------------|
| 1   | A0A0H5R9V4       | Uncharacterized protein                               |
| 2   | A0A0H5QQ41       | Uncharacterized protein                               |
| 3   | A0A0H5R774       | Uncharacterized protein                               |
| 4   | A0A0H5R6P1       | Phosphoenolpyruvate carboxykinase (GTP) (EC 4.1.1.32) |
| 5   | A0A0H5RUC1       | Uncharacterized protein                               |
| 6   | A0A0H5R7A6       | Uncharacterized protein                               |
| 7   | A0A0H5RCH5       | NodB homology domain-containing protein               |
| 8   | A0A0H5R6J1       | Uncharacterized protein                               |
| 9   | A0A0H5RJ90       | Uncharacterized protein                               |
| 10  | A0A0H5QJF8       | Uncharacterized protein                               |
| 11  | A0A0H5QLH5       | Uncharacterized protein                               |
| 12  | A0A0H5QYG3       | Uncharacterized protein                               |
| 13  | A0A0H5QSM4       | GH16 domain-containing protein                        |
| 14  | A0A0H5R4K2       | Uncharacterized protein                               |
| 15  | A0A0H5R4U4       | Uncharacterized protein                               |
| 16  | A0A0H5R3K8       | Uncharacterized protein                               |
| 17  | A0A0H5R3W2       | Uncharacterized protein                               |
