# Supplementary material for: In Planta Transcriptome and Proteome Profiles of Spongospora subterranea in Resistant and Susceptible Host Environments Illuminates Regulatory Principles Underlying Host–Pathogen Interaction
Source: MDPI journal article supplement (doi:10.3390/biology10090840), 2021-08-28

**Figure S2-** Comparison of differently abundant transcripts from *S. subterranea* in resistant and susceptible potato cultivars. G; Gladiator, I; Iwa

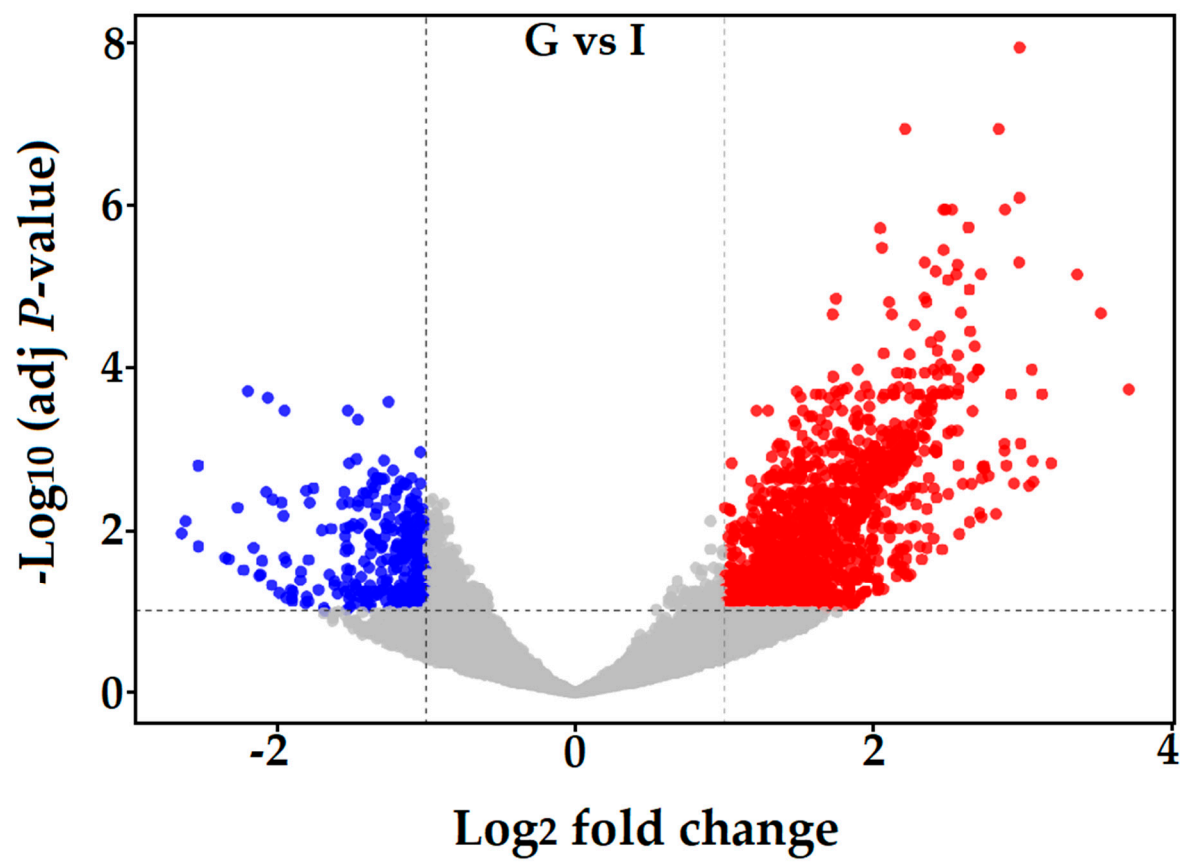

Supplement: s1 [file s1]
