# Supplementary material for: In Planta Transcriptome and Proteome Profiles of Spongospora subterranea in Resistant and Susceptible Host Environments Illuminates Regulatory Principles Underlying Host–Pathogen Interaction
Source: MDPI journal article supplement (doi:10.3390/biology10090840), 2021-08-28
Supplement: s1 [file s1]

| Table S2. RNA-seq raw reads and alignment statistics |                     |                             |
|------------------------------------------------------|---------------------|-----------------------------|
|                                                      | Total quality reads | Mapped reads to Spongospora |
| G1                                                   | 74,130,035          | 4,299,542                   |
| G2                                                   | 59,956,347          | 2,326,306                   |
| G3                                                   | 71,378,260          | 6,509,697                   |
| <b>Average Gladiator</b>                             | <b>68,488,214</b>   | <b>4,378,515</b>            |
| I1                                                   | 60,499,120          | 3,623,897                   |
| I2                                                   | 62,383,322          | 4,123,537                   |
| I3                                                   | 71,612,245          | 4,253,767                   |
| <b>Average Iwa</b>                                   | <b>64,831,562</b>   | <b>4,000,400</b>            |
