# Supplementary material for: In Planta Transcriptome and Proteome Profiles of Spongospora subterranea in Resistant and Susceptible Host Environments Illuminates Regulatory Principles Underlying Host–Pathogen Interaction
Source: MDPI journal article supplement (doi:10.3390/biology10090840), 2021-08-28

**Figure S1- Correlation between RNA-seq and qPCR.** Ten randomly selected transcript were subjected to the qPCR analysis. The log-transferred of RNA-seq results and qPCR plotted in Figure S1.

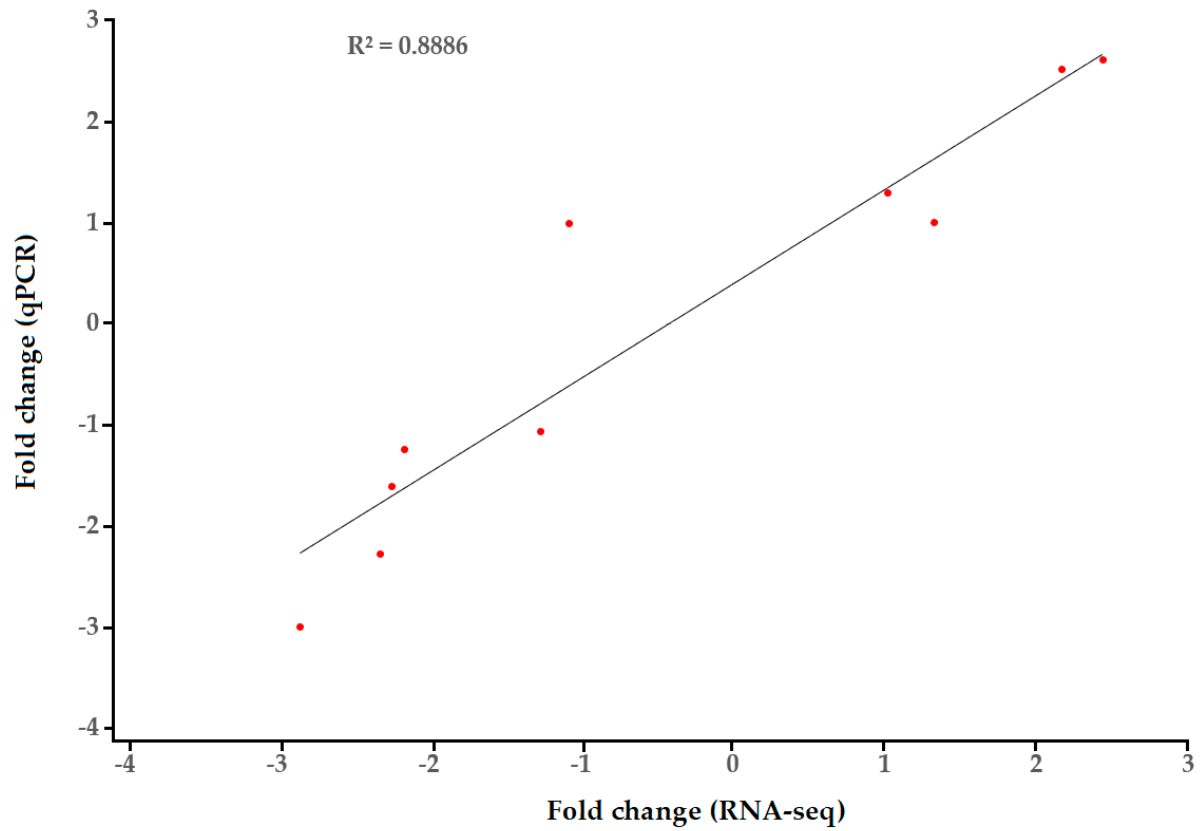

Supplement: s1 [file s1]
