# Supplementary material for: In Planta Transcriptome and Proteome Profiles of Spongospora subterranea in Resistant and Susceptible Host Environments Illuminates Regulatory Principles Underlying Host–Pathogen Interaction
Source: Biology (Basel). 2021 Aug 28;10(9):840. doi: 10.3390/biology10090840 (PMC8471823; doi:10.3390/biology10090840)
Supplement: Supplementary file 1 [file biology-10-00840-s001.zip]

Archive with 8 entries (8 files):
- Figure S1- Correlation between RNA-seq and qPCR.pdf
- Figure S2- Comparison of differently abundant transcripts from S. subterranea in resistant and susceptible potato cultivars.pdf
- Table S1- List of primers used in this study.xlsx
- Table S2- RNA-seq information.pdf
- Table S3- List of identified, annotated and differentially expressed transcripts.xlsx
- Table S4- List of identified and differentially expressed proteins.xlsx
- Table S5- List of common proteins in both RNA-seq and proteomics.pdf
- Table S6- List of identified proteins in our transcriptome database.xlsx
