# Supplementary material for: In Planta Transcriptome and Proteome Profiles of Spongospora subterranea in Resistant and Susceptible Host Environments Illuminates Regulatory Principles Underlying Host–Pathogen Interaction
Source: Biology (Basel). 2021 Aug 28;10(9):840. doi: 10.3390/biology10090840 (PMC8471823; doi:10.3390/biology10090840)
Supplement: Supplementary file 1 [file biology-10-00840-s001.zip › Table S1- List of primers used in this study.xlsx]

## Sheet: Sheet1
GeneID	Base mean	log2(FC)	StdErr	Wald-Stats	P-value	P-adj	Protein ID	Protein name
TCONS_00003389	135.791	1.28344	0.389595	3.29428	0.000986732	0.0106467	A2VDR2	Acyl-CoA-binding domain-containing protein 6
TCONS_00004731	623.848	1.11563	0.39866	2.79846	0.00513466	0.0343358	Q9SSQ8	26.5 kDa heat shock protein, mitochondrial (AtHsp26.5)
TCONS_00013351	215.827	-1.17246	0.303739	-3.86008	0.00011335	0.00249893	A0A0H5R5F6	Uncharacterized protein (Fragment)
TCONS_00005782	84.7346	-1.21434	0.33916	-3.58043	0.000343029	0.00517589	F4JC97	Proteasome activator subunit 4 (Proteasome activator PA200)
TCONS_00001300	42.3347	-1.5106	0.448842	-3.36555	0.000763903	0.00892252	Q5UPG6	Putative ankyrin repeat protein L92

## Sheet: primers
Protein ID		Primer sequence (5' 3')
TCONS_00005782	F	CGAGCACCCTTAAACAGGAG
	R	GGATGATAGGCTCTGCTTGC
TCONS_00003389	F	TTCACCAGTTCGATTCCGCA
	R	CCAACAGTTAGCCGTGTTGC
TCONS_00013351	F	TGTTCCCTCCAATCTTCGTC
	R	GTTTCGCTCGTTGACTGTGA
TCONS_00001300	F	AACTCGGTCATGGCAAAATC
	R	GGCCACGCTAAGAATACCAA
TCONS_00004731	F	AGCCTCGTAAATTGCTCGAA
	R	TCACGTTGAGCGAAAACAAC
TCONS_00004401	F	TCTGATTATACCCGCCCATT
	R	TTACCCGTTCAAACCAGGTC
TCONS_00015472	F	TAACCTGCGTCACATTCAGC
	R	CAGTCTCGCGTTATCGTCAA
TCONS_00012306	F	TATGGCCAGTGTTCGACGAG
	R	TGTTCCCGACAAGGTTACGG
TCONS_00007913	F	CGACAAACCAGTCAAAACGA
	R	TCTGCTTTCGCTACGGTTTT
TCONS_00003976	F	TCTGTCGAAATCGCGTACCT
	R	TCACATCGCAACTGAAACGC
Internal contol
Marine bacteria	F	CGGAATTACTGGGCGTAAAG
	R	CACACTCTAGTTTGCCAGTTCG
