# Supplementary material for: In Planta Transcriptome and Proteome Profiles of Spongospora subterranea in Resistant and Susceptible Host Environments Illuminates Regulatory Principles Underlying Host–Pathogen Interaction
Source: Biology (Basel). 2021 Aug 28;10(9):840. doi: 10.3390/biology10090840 (PMC8471823; doi:10.3390/biology10090840)
Supplement: Supplementary file 1 [file biology-10-00840-s001.zip › Table S3- List of identified, annotated and differentially expressed transcripts.xlsx]

## Sheet: Total
GeneID	Base mean	log2(FC)	StdErr	Wald-Stats	P-value	P-adj
TCONS_00005876	700.802	2.97658	0.420789	7.07382	1.50727e-12	1.15306e-08
TCONS_00013193	130.016	2.20904	0.335495	6.58442	4.56653e-11	1.16446e-07
TCONS_00015533	598.624	2.83643	0.429246	6.60793	3.89724e-11	1.16446e-07
TCONS_00001907	36.0132	2.97553	0.47667	6.24232	4.3113e-10	8.24537e-07
TCONS_00011188	70.2646	2.48125	0.404603	6.13255	8.64821e-10	1.14782e-06
TCONS_00012184	101.932	2.46728	0.405789	6.0802	1.20033e-09	1.14782e-06
TCONS_00013739	45.5244	2.52619	0.412554	6.12329	9.1662e-10	1.14782e-06
TCONS_00014994	65.1419	2.88101	0.472919	6.09198	1.1152e-09	1.14782e-06
TCONS_00014446	73.8398	2.63269	0.440185	5.98088	2.2193e-09	1.8864e-06
TCONS_00008915	96.5791	2.0441	0.343053	5.95855	2.54484e-09	1.94681e-06
TCONS_00015322	327.786	2.05478	0.351	5.85408	4.79651e-09	3.33576e-06
TCONS_00016415	80.6588	2.46795	0.423578	5.82643	5.66244e-09	3.60981e-06
TCONS_00000911	131.494	2.97326	0.517818	5.7419	9.36219e-09	5.11577e-06
TCONS_00006966	389.42	2.34104	0.407018	5.75167	8.8364e-09	5.11577e-06
TCONS_00013802	225.281	2.56117	0.447776	5.71975	1.06679e-08	5.44064e-06
TCONS_00014002	217.023	2.41434	0.425396	5.67552	1.3827e-08	6.61102e-06
TCONS_00010710	476.081	2.7209	0.481328	5.65291	1.57755e-08	7.09897e-06
TCONS_00007744	79.2407	2.55216	0.453078	5.63293	1.77174e-08	7.17097e-06
TCONS_00014381	80.7913	3.3651	0.597493	5.63203	1.78102e-08	7.17097e-06
TCONS_00002363	106.43	2.50121	0.446983	5.59576	2.19657e-08	8.40187e-06
TCONS_00004497	43.7231	2.64146	0.476719	5.54092	3.00887e-08	1.09609e-05
TCONS_00009114	92.4713	2.33992	0.426031	5.49237	3.96575e-08	1.379e-05
TCONS_00010671	1060.44	1.74827	0.319009	5.4803	4.24594e-08	1.41224e-05
TCONS_00001010	1337.88	2.1045	0.386449	5.44573	5.15927e-08	1.57874e-05
TCONS_00013603	153.474	2.353	0.431954	5.44734	5.11301e-08	1.57874e-05
TCONS_00004871	70.4088	2.586	0.480198	5.38529	7.23276e-08	2.1281e-05
TCONS_00004388	14.7058	3.52229	0.655249	5.37549	7.63744e-08	2.16394e-05
TCONS_00016406	331.409	1.72319	0.321524	5.35943	8.34829e-08	2.22687e-05
TCONS_00016752	226.547	2.12114	0.395926	5.35742	8.44174e-08	2.22687e-05
TCONS_00014302	60.9912	2.27249	0.428977	5.29745	1.17431e-07	2.99448e-05
TCONS_00016914	80.1069	2.64867	0.503795	5.25745	1.4607e-07	3.60463e-05
TCONS_00001513	533.52	2.44437	0.467687	5.22651	1.72738e-07	4.12951e-05
TCONS_00004174	2059.96	2.38459	0.459598	5.18842	2.12086e-07	4.91654e-05
TCONS_00012024	39.7367	2.67732	0.518599	5.1626	2.43548e-07	5.47984e-05
TCONS_00007713	1045.67	2.42788	0.472702	5.13617	2.80389e-07	6.12851e-05
TCONS_00001788	254.605	2.0651	0.403861	5.11338	3.16442e-07	6.72439e-05
TCONS_00001365	554.628	2.24204	0.43936	5.10296	3.34376e-07	6.91345e-05
TCONS_00008527	37.766	2.56182	0.503006	5.09302	3.52396e-07	7.09429e-05
TCONS_00007704	326.503	2.452	0.48655	5.03956	4.66596e-07	9.15246e-05
TCONS_00003892	737.618	2.47909	0.497219	4.98591	6.16696e-07	0.000105608
TCONS_00008775	900.854	1.89417	0.378366	5.00619	5.55179e-07	0.000105608
TCONS_00009176	286.667	2.51385	0.504333	4.9845	6.21226e-07	0.000105608
TCONS_00014447	22.3778	2.70156	0.540712	4.99629	5.84434e-07	0.000105608
TCONS_00016849	140.6	2.40042	0.48117	4.98871	6.07838e-07	0.000105608
TCONS_00016929	21.3684	3.06216	0.612854	4.99657	5.83602e-07	0.000105608
TCONS_00010071	32.0946	2.6957	0.541322	4.97985	6.36341e-07	0.000105826
TCONS_00001364	162.714	2.34179	0.472759	4.95346	7.29045e-07	0.000115204
TCONS_00010454	435.021	2.21954	0.448291	4.95111	7.37909e-07	0.000115204
TCONS_00016622	1919.89	2.16092	0.436106	4.95504	7.23156e-07	0.000115204
TCONS_00016883	93.4301	2.24701	0.454821	4.94044	7.79472e-07	0.000119259
TCONS_00003383	771.453	2.42878	0.492627	4.93027	8.2117e-07	0.000123175
TCONS_00012425	22.8403	2.66559	0.542248	4.91582	8.84133e-07	0.00013007
TCONS_00010428	229.518	1.72657	0.351506	4.91192	9.01898e-07	0.00013018
TCONS_00003759	53.0058	2.56592	0.523707	4.89954	9.60625e-07	0.000136088
TCONS_00007126	184.966	1.95072	0.402288	4.84907	1.24042e-06	0.000172531
TCONS_00008785	176.1	2.17008	0.448015	4.84377	1.27398e-06	0.000174034
TCONS_00003351	1833.58	2.23587	0.462839	4.83077	1.36004e-06	0.000179384
TCONS_00011335	146.682	1.82214	0.377137	4.83152	1.35496e-06	0.000179384
TCONS_00002546	398.002	2.13058	0.442378	4.8162	1.46316e-06	0.000185503
TCONS_00009614	7.18528	3.71127	0.770929	4.81403	1.47918e-06	0.000185503
TCONS_00015549	284.652	2.56906	0.533516	4.81534	1.46949e-06	0.000185503
TCONS_00000376	43.7808	2.46682	0.512901	4.80956	1.51266e-06	0.000186642
TCONS_00003648	781.457	1.78817	0.372101	4.8056	1.54286e-06	0.000187347
TCONS_00013819	44.0171	-2.19754	0.458253	-4.79546	1.62299e-06	0.000193998
TCONS_00000945	338.768	2.3943	0.50001	4.7885	1.68032e-06	0.000195466
TCONS_00005493	818.946	1.48422	0.310122	4.78594	1.70192e-06	0.000195466
TCONS_00005583	2699.88	1.74814	0.365445	4.78358	1.72199e-06	0.000195466
TCONS_00010070	81.5457	2.50587	0.524044	4.78178	1.73748e-06	0.000195466
TCONS_00011186	38.7335	2.48286	0.522351	4.75323	2.00191e-06	0.000213515
TCONS_00011266	69.3123	2.3079	0.485252	4.75609	1.97379e-06	0.000213515
TCONS_00012127	160.381	2.4581	0.517226	4.75246	2.00955e-06	0.000213515
TCONS_00014818	104.977	2.06925	0.435094	4.75588	1.97583e-06	0.000213515
TCONS_00001700	145.771	2.29382	0.485112	4.72843	2.26265e-06	0.000213695
TCONS_00001927	775.486	2.41181	0.509604	4.73271	2.21542e-06	0.000213695
TCONS_00002510	194.613	1.61358	0.340225	4.74269	2.10904e-06	0.000213695
TCONS_00003508	167.579	2.55654	0.539234	4.74106	2.12601e-06	0.000213695
TCONS_00004764	70.3285	1.64423	0.346671	4.74292	2.10661e-06	0.000213695
TCONS_00009540	12.6715	3.13089	0.662114	4.72862	2.26051e-06	0.000213695
TCONS_00011397	48.0846	2.13148	0.450423	4.73217	2.22137e-06	0.000213695
TCONS_00014969	65.8124	1.97083	0.416103	4.7364	2.17546e-06	0.000213695
TCONS_00016757	16.6285	2.9235	0.616651	4.74093	2.12735e-06	0.000213695
TCONS_00009280	894.025	1.76375	0.373496	4.72226	2.33233e-06	0.000217589
TCONS_00008200	362.059	2.13557	0.452551	4.71896	2.37058e-06	0.000218493
TCONS_00007185	72.5267	1.91069	0.405632	4.7104	2.47227e-06	0.000225153
TCONS_00007854	100.199	1.50811	0.320717	4.70232	2.57225e-06	0.000231502
TCONS_00001357	355.198	1.70207	0.362822	4.6912	2.71609e-06	0.000236114
TCONS_00007064	50.8756	2.0594	0.43863	4.69507	2.66516e-06	0.000236114
TCONS_00013242	49.5376	-2.06339	0.439786	-4.69181	2.70794e-06	0.000236114
TCONS_00008500	248.322	2.24463	0.47908	4.6853	2.7955e-06	0.000237617
TCONS_00015551	1502.71	2.38568	0.509108	4.68599	2.78607e-06	0.000237617
TCONS_00014382	238.721	2.3556	0.504284	4.67118	2.99478e-06	0.000251759
TCONS_00014367	1548.28	-1.25171	0.268587	-4.66034	3.15692e-06	0.000262505
TCONS_00006069	104.56	1.74618	0.376678	4.63575	3.55647e-06	0.000289436
TCONS_00013162	8740.54	2.38942	0.515295	4.63699	3.53527e-06	0.000289436
TCONS_00016037	436.32	1.97121	0.426314	4.62385	3.76673e-06	0.000303321
TCONS_00016746	168.771	2.33704	0.506604	4.61315	3.96608e-06	0.000316047
TCONS_00003851	2243.66	2.38745	0.518921	4.6008	4.20864e-06	0.000331919
TCONS_00005295	11224.3	2.33598	0.5091	4.58845	4.46546e-06	0.000337031
TCONS_00005375	57.8382	1.7866	0.389547	4.58635	4.51068e-06	0.000337031
TCONS_00007059	154.351	1.52644	0.332518	4.59056	4.42065e-06	0.000337031
TCONS_00009321	2471.19	1.29159	0.281391	4.59002	4.4321e-06	0.000337031
TCONS_00012336	47.8967	-1.94871	0.42501	-4.58509	4.53781e-06	0.000337031
TCONS_00013462	320.909	-1.52496	0.331868	-4.59507	4.32611e-06	0.000337031
TCONS_00014837	2814.4	1.21327	0.264781	4.58218	4.60146e-06	0.000338473
TCONS_00010736	160.36	1.88729	0.412299	4.57746	4.70646e-06	0.000341874
TCONS_00012717	32.7297	2.66354	0.582053	4.57611	4.73708e-06	0.000341874
TCONS_00005037	5454.42	2.35444	0.51503	4.57146	4.84344e-06	0.000343077
TCONS_00010250	279.826	1.6923	0.370073	4.57288	4.81056e-06	0.000343077
TCONS_00006206	1105.83	2.31083	0.507719	4.5514	5.32908e-06	0.000374013
TCONS_00003193	99.7251	1.56784	0.345848	4.53331	5.80655e-06	0.0004014
TCONS_00014846	214.216	1.587	0.350125	4.53267	5.82423e-06	0.0004014
TCONS_00010208	560.18	1.89866	0.419197	4.52926	5.91895e-06	0.000404286
TCONS_00000263	956.062	1.95846	0.434381	4.50863	6.52473e-06	0.000437059
TCONS_00000570	203.039	1.86629	0.414041	4.50749	6.55976e-06	0.000437059
TCONS_00005455	153.526	1.63992	0.364144	4.5035	6.68443e-06	0.000437059
TCONS_00010722	119.446	1.97251	0.437849	4.50501	6.63689e-06	0.000437059
TCONS_00014226	530.751	-1.45693	0.323382	-4.5053	6.62806e-06	0.000437059
TCONS_00006564	618.781	1.46923	0.326971	4.49346	7.00751e-06	0.000452434
TCONS_00009739	2057.64	2.37993	0.529752	4.49254	7.03787e-06	0.000452434
TCONS_00003931	207.814	1.8926	0.422779	4.47657	7.58521e-06	0.000483557
TCONS_00004228	118.799	2.1411	0.478731	4.47244	7.73306e-06	0.000485137
TCONS_00015383	63.6778	2.25657	0.504561	4.47234	7.73683e-06	0.000485137
TCONS_00016794	28.8013	2.36337	0.528696	4.4702	7.81476e-06	0.00048604
TCONS_00011426	5521.21	2.34797	0.526213	4.46202	8.11906e-06	0.000500894
TCONS_00003331	68.1764	1.89262	0.425274	4.45035	8.57321e-06	0.000518079
TCONS_00007642	48.9491	1.6852	0.378725	4.44966	8.6008e-06	0.000518079
TCONS_00011350	1012.26	2.27717	0.511492	4.45202	8.50672e-06	0.000518079
TCONS_00003321	678.904	1.47742	0.332169	4.44781	8.67492e-06	0.000518462
TCONS_00009431	181.378	2.19725	0.494879	4.43998	8.99679e-06	0.000533531
TCONS_00009647	55.3425	1.9819	0.44834	4.42053	9.84592e-06	0.000579395
TCONS_00011212	55.2204	2.05622	0.465598	4.41631	1.00402e-05	0.000586193
TCONS_00014070	109.036	1.62127	0.367243	4.41471	1.01147e-05	0.000586193
TCONS_00006477	32.1585	2.52183	0.572379	4.40588	1.05356e-05	0.000597017
TCONS_00009742	20.1181	2.56045	0.581104	4.40619	1.05207e-05	0.000597017
TCONS_00012364	395.904	2.16075	0.490336	4.40667	1.04971e-05	0.000597017
TCONS_00015117	38.0891	2.09834	0.477057	4.3985	1.09e-05	0.000613125
TCONS_00010314	1177.65	1.76139	0.400981	4.3927	1.11952e-05	0.000625132
TCONS_00002731	37.827	2.49852	0.569604	4.38642	1.15233e-05	0.00063879
TCONS_00007285	94.7687	1.78374	0.406944	4.38324	1.16925e-05	0.000643509
TCONS_00009970	191.292	1.66805	0.38107	4.37727	1.20174e-05	0.000656666
TCONS_00005257	618.674	2.10495	0.481536	4.37132	1.23498e-05	0.000670044
TCONS_00016069	325.668	2.22111	0.508303	4.36965	1.24446e-05	0.000670433
TCONS_00002288	1979.99	2.14519	0.491342	4.36598	1.26555e-05	0.000672325
TCONS_00009432	4178.75	2.23954	0.512886	4.36655	1.26224e-05	0.000672325
TCONS_00001784	1049.07	1.52003	0.348694	4.3592	1.3054e-05	0.000688709
TCONS_00002559	166.674	1.79619	0.412814	4.35109	1.35465e-05	0.00070067
TCONS_00003087	761.946	2.31248	0.531485	4.35098	1.3553e-05	0.00070067
TCONS_00014650	786.392	2.05285	0.471817	4.35094	1.35554e-05	0.00070067
TCONS_00006497	132.846	2.22203	0.511396	4.34504	1.39253e-05	0.000703154
TCONS_00010149	218.467	2.14104	0.492838	4.34431	1.39712e-05	0.000703154
TCONS_00010737	32.7386	2.32765	0.535731	4.34481	1.39395e-05	0.000703154
TCONS_00011314	3786.92	2.2434	0.516204	4.34596	1.38669e-05	0.000703154
TCONS_00010606	2065.65	2.20512	0.508801	4.33395	1.46459e-05	0.000732295
TCONS_00010145	10232.5	2.22094	0.513185	4.32775	1.50637e-05	0.000743468
TCONS_00012659	125.295	2.34062	0.540673	4.32909	1.49729e-05	0.000743468
TCONS_00016176	281.983	2.11764	0.489949	4.32217	1.54501e-05	0.00075765
TCONS_00016155	164.749	1.90226	0.441083	4.31271	1.61267e-05	0.00078579
TCONS_00008848	2378.22	2.09158	0.486616	4.29821	1.72183e-05	0.000833669
TCONS_00005525	809.872	1.55696	0.362404	4.29621	1.73742e-05	0.000835927
TCONS_00016941	1071.75	1.96316	0.457496	4.29111	1.77785e-05	0.000850032
TCONS_00011267	773.182	1.81935	0.42435	4.28738	1.80789e-05	0.000855347
TCONS_00011712	10.9972	2.9846	0.696203	4.28696	1.81132e-05	0.000855347
TCONS_00002049	101.149	1.73855	0.405689	4.28543	1.8239e-05	0.000856
TCONS_00009379	799.224	1.36494	0.31873	4.28242	1.84868e-05	0.000857187
TCONS_00014566	90.9205	2.21552	0.517355	4.28241	1.84884e-05	0.000857187
TCONS_00010989	28.0232	2.20704	0.515739	4.27937	1.87426e-05	0.00085857
TCONS_00010999	12.0296	2.87723	0.672223	4.28018	1.86742e-05	0.00085857
TCONS_00008065	8739.98	2.26468	0.529872	4.27401	1.91986e-05	0.000874223
TCONS_00000261	1597.4	2.13695	0.500911	4.26613	1.98891e-05	0.000894417
TCONS_00002925	63.1328	1.78631	0.418666	4.26666	1.98418e-05	0.000894417
TCONS_00004966	1264.84	1.75452	0.411379	4.26497	1.99928e-05	0.000894417
TCONS_00000002	1115.12	1.70853	0.400937	4.26133	2.03214e-05	0.000903832
TCONS_00003486	2770.88	2.22627	0.523247	4.25472	2.09312e-05	0.000908926
TCONS_00003554	1029.1	2.19313	0.515227	4.25663	2.07535e-05	0.000908926
TCONS_00006565	994.705	2.12303	0.499255	4.2524	2.11489e-05	0.000908926
TCONS_00007443	40.6774	1.7739	0.417147	4.25245	2.1144e-05	0.000908926
TCONS_00013020	1579.88	2.26502	0.532545	4.2532	2.10736e-05	0.000908926
TCONS_00014319	91.8732	1.40152	0.329243	4.25678	2.07394e-05	0.000908926
TCONS_00010607	928.975	2.00441	0.472034	4.24633	2.17296e-05	0.000928666
TCONS_00005673	11350	1.35346	0.319285	4.23904	2.2448e-05	0.000943555
TCONS_00006380	88.4547	2.41949	0.570733	4.23927	2.24244e-05	0.000943555
TCONS_00013773	2701.95	2.00661	0.473353	4.23914	2.24374e-05	0.000943555
TCONS_00006736	899.374	2.22588	0.525462	4.23605	2.27491e-05	0.000946311
TCONS_00015956	24.9377	2.25025	0.531229	4.23593	2.2761e-05	0.000946311
TCONS_00013804	1455.48	1.59478	0.376894	4.23139	2.32255e-05	0.000960405
TCONS_00004376	833.079	1.81091	0.429812	4.21326	2.5171e-05	0.00103526
TCONS_00007016	21.8273	2.40513	0.571438	4.2089	2.5662e-05	0.00104422
TCONS_00013135	518.856	2.00162	0.475458	4.20989	2.55496e-05	0.00104422
TCONS_00000172	4593.22	1.85118	0.440928	4.19838	2.6883e-05	0.00105587
TCONS_00006605	8.60248	2.87824	0.685431	4.19917	2.679e-05	0.00105587
TCONS_00008839	25.1709	2.33875	0.556997	4.19885	2.68269e-05	0.00105587
TCONS_00008911	239.778	1.85396	0.44153	4.19895	2.68152e-05	0.00105587
TCONS_00008950	907.287	2.16872	0.516594	4.19812	2.69144e-05	0.00105587
TCONS_00009259	4208.22	2.2224	0.529055	4.2007	2.6609e-05	0.00105587
TCONS_00013477	41.3276	1.66731	0.396888	4.20096	2.65789e-05	0.00105587
TCONS_00008406	3678.5	1.97938	0.472156	4.19223	2.76226e-05	0.00107813
TCONS_00008168	288.826	1.84588	0.440438	4.19101	2.77713e-05	0.00107843
TCONS_00009434	12308.4	2.04277	0.487842	4.18737	2.82208e-05	0.00109035
TCONS_00004098	78.2463	1.39152	0.332442	4.18577	2.84198e-05	0.00109252
TCONS_00003150	5710.78	2.06101	0.493256	4.17838	2.93587e-05	0.00109374
TCONS_00003833	82.2429	1.54719	0.36988	4.18296	2.87743e-05	0.00109374
TCONS_00006221	17.3374	2.41622	0.578755	4.17486	2.98166e-05	0.00109374
TCONS_00006579	130.158	1.8614	0.445248	4.1806	2.90743e-05	0.00109374
TCONS_00008910	39.5788	1.7246	0.412578	4.18006	2.91437e-05	0.00109374
TCONS_00009158	182.106	1.50104	0.359584	4.17437	2.98814e-05	0.00109374
TCONS_00015807	35.792	2.4213	0.579807	4.17604	2.96624e-05	0.00109374
TCONS_00016666	1145.12	-1.03863	0.248253	-4.18375	2.86745e-05	0.00109374
TCONS_00016679	2893.57	2.20927	0.528978	4.17649	2.96043e-05	0.00109374
TCONS_00016739	226.172	1.62184	0.388463	4.17503	2.97946e-05	0.00109374
TCONS_00001566	374.603	1.48296	0.355707	4.16906	3.0586e-05	0.00110893
TCONS_00004573	836.488	1.89773	0.455145	4.1695	3.05269e-05	0.00110893
TCONS_00001141	5102.27	2.15323	0.517498	4.16085	3.17064e-05	0.00114412
TCONS_00004455	3845.91	1.9448	0.468394	4.15206	3.29493e-05	0.00117238
TCONS_00009130	1038.77	1.98272	0.47731	4.15395	3.26782e-05	0.00117238
TCONS_00010639	7260.19	2.12749	0.512376	4.15221	3.29282e-05	0.00117238
TCONS_00005212	31.923	2.06814	0.499188	4.143	3.42788e-05	0.00120844
TCONS_00005235	4142.28	1.9651	0.474221	4.14384	3.41531e-05	0.00120844
TCONS_00003010	146.677	2.2305	0.538759	4.14007	3.47195e-05	0.00121837
TCONS_00005877	40.693	1.98055	0.478951	4.13517	3.54687e-05	0.00123897
TCONS_00007172	364.472	2.24742	0.544228	4.12955	3.63479e-05	0.0012582
TCONS_00009139	2520.26	2.03668	0.493195	4.12956	3.63458e-05	0.0012582
TCONS_00003570	7253.13	2.10054	0.508978	4.12698	3.67554e-05	0.00126208
TCONS_00009734	167.104	2.03772	0.49378	4.12677	3.679e-05	0.00126208
TCONS_00000285	26258.1	1.31833	0.319683	4.12385	3.72591e-05	0.0012681
TCONS_00000574	3261.59	2.13585	0.517957	4.12362	3.72969e-05	0.0012681
TCONS_00001329	22.7003	2.24076	0.543587	4.12217	3.75321e-05	0.00127045
TCONS_00008162	47.853	1.84222	0.447486	4.11682	3.84131e-05	0.00129454
TCONS_00001011	34.4454	2.12112	0.515581	4.11403	3.88813e-05	0.00130457
TCONS_00001325	2354.38	2.12593	0.51708	4.11143	3.93223e-05	0.00131361
TCONS_00003135	336.113	1.50273	0.366229	4.10325	4.07395e-05	0.00134335
TCONS_00005810	79.6337	1.90881	0.465164	4.10351	4.06923e-05	0.00134335
TCONS_00014981	97.2072	-1.46647	0.35723	-4.10512	4.04109e-05	0.00134335
TCONS_00016291	284.906	-1.28528	0.313939	-4.09405	4.23904e-05	0.00139179
TCONS_00002930	1229.11	2.19865	0.538663	4.08168	4.47118e-05	0.0014162
TCONS_00004892	104.904	2.04829	0.502001	4.08026	4.49852e-05	0.0014162
TCONS_00005871	81.0666	2.29133	0.561363	4.08172	4.47033e-05	0.0014162
TCONS_00006478	8.09254	3.06786	0.751208	4.0839	4.42859e-05	0.0014162
TCONS_00006754	2350.47	2.16974	0.531365	4.08333	4.4394e-05	0.0014162
TCONS_00008800	2053.82	2.11709	0.517794	4.08867	4.33863e-05	0.0014162
TCONS_00010843	2050.43	1.91284	0.468204	4.08549	4.39835e-05	0.0014162
TCONS_00011092	85.4516	2.1671	0.530369	4.08603	4.38816e-05	0.0014162
TCONS_00013340	751.504	1.61037	0.394126	4.08592	4.3903e-05	0.0014162
TCONS_00013584	52.3214	1.95887	0.480027	4.08076	4.48887e-05	0.0014162
TCONS_00005759	120.131	1.50134	0.368159	4.07797	4.54314e-05	0.00142438
TCONS_00015819	165.915	2.22542	0.54594	4.07631	4.57563e-05	0.00142872
TCONS_00015262	46.4853	2.08176	0.511866	4.06701	4.76208e-05	0.00148089
TCONS_00011845	2049.76	1.04934	0.258218	4.06378	4.82852e-05	0.00149547
TCONS_00014402	1744.07	2.0385	0.501834	4.0621	4.86333e-05	0.00149863
TCONS_00015870	76.9539	-1.51696	0.373506	-4.0614	4.87789e-05	0.00149863
TCONS_00002390	187.655	1.62966	0.401625	4.05766	4.95677e-05	0.00149879
TCONS_00007817	96.2649	1.49926	0.36947	4.05788	4.95208e-05	0.00149879
TCONS_00013756	10.2362	3.18953	0.785814	4.05889	4.93067e-05	0.00149879
TCONS_00015947	77.1761	1.41592	0.348877	4.05852	4.93851e-05	0.00149879
TCONS_00010616	2923.59	2.09681	0.516973	4.05595	4.99317e-05	0.00150385
TCONS_00010608	77.5301	2.07254	0.511246	4.05389	5.03721e-05	0.00151116
TCONS_00012503	1721.94	1.78495	0.441245	4.04527	5.22639e-05	0.00155938
TCONS_00016747	172.123	2.00488	0.495679	4.04471	5.23869e-05	0.00155938
TCONS_00011021	12.1918	2.56716	0.635209	4.04144	5.3125e-05	0.00157522
TCONS_00009301	295.399	2.20781	0.546421	4.04049	5.33386e-05	0.00157545
TCONS_00011828	21.3624	-2.52937	0.626646	-4.03636	5.42863e-05	0.00159115
TCONS_00013440	6582.98	2.02066	0.50061	4.03639	5.42809e-05	0.00159115
TCONS_00007018	10.1906	2.88932	0.716039	4.03514	5.45701e-05	0.00159336
TCONS_00009539	105.136	1.84578	0.457813	4.03173	5.5367e-05	0.00160921
TCONS_00014691	17.8834	2.7395	0.679603	4.03103	5.55337e-05	0.00160921
TCONS_00004077	46.7399	1.99983	0.496432	4.02841	5.61556e-05	0.0016211
TCONS_00010300	143.908	1.55747	0.386812	4.02644	5.66286e-05	0.0016286
TCONS_00011619	180.944	1.57095	0.39028	4.02518	5.69315e-05	0.00163118
TCONS_00013604	139.213	1.54149	0.38328	4.02184	5.77447e-05	0.00164831
TCONS_00012034	2144.34	2.09457	0.521087	4.01961	5.82941e-05	0.00165781
TCONS_00000434	11.9603	2.73209	0.680319	4.0159	5.92189e-05	0.00167787
TCONS_00009731	13798.6	2.1359	0.532659	4.00989	6.07476e-05	0.00171483
TCONS_00002304	86.5054	1.52414	0.380702	4.0035	6.24124e-05	0.00175535
TCONS_00008484	167.496	1.81366	0.453355	4.00053	6.32001e-05	0.00176277
TCONS_00008676	142.332	1.44596	0.361521	3.99965	6.34354e-05	0.00176277
TCONS_00009298	19.4605	2.74232	0.685744	3.99905	6.3598e-05	0.00176277
TCONS_00012290	6688.96	2.12418	0.530865	4.00136	6.29802e-05	0.00176277
TCONS_00002689	1242.81	1.72548	0.431746	3.99652	6.42804e-05	0.00177525
TCONS_00011171	2064.72	2.03221	0.508627	3.99547	6.4566e-05	0.00177673
TCONS_00006772	33.1961	1.82715	0.457754	3.99156	6.56395e-05	0.00179357
TCONS_00008361	65.13	1.93163	0.483932	3.99154	6.56469e-05	0.00179357
TCONS_00003390	60.1144	1.94683	0.488242	3.98744	6.67905e-05	0.00180601
TCONS_00003984	43.8055	1.80518	0.452858	3.98619	6.71432e-05	0.00180601
TCONS_00006636	178.411	1.65264	0.414716	3.985	6.74797e-05	0.00180601
TCONS_00010771	192.976	1.87733	0.470746	3.98799	6.66352e-05	0.00180601
TCONS_00012825	863.786	2.06202	0.517339	3.98582	6.72488e-05	0.00180601
TCONS_00014877	523.178	1.74234	0.437239	3.98486	6.75189e-05	0.00180601
TCONS_00007899	57.1202	1.74432	0.438019	3.98229	6.82539e-05	0.00181931
TCONS_00002321	431.462	1.34288	0.337558	3.97821	6.94358e-05	0.00184257
TCONS_00003690	181.55	-1.22302	0.307476	-3.97762	6.96083e-05	0.00184257
TCONS_00011001	2174.45	2.19362	0.551935	3.97442	7.0551e-05	0.00186109
TCONS_00010483	83.055	2.08315	0.524418	3.97232	7.11767e-05	0.00187114
TCONS_00013219	4143.66	1.83224	0.462043	3.96553	7.32323e-05	0.00191859
TCONS_00000335	32.6315	2.13536	0.5386	3.96464	7.35063e-05	0.00191919
TCONS_00006066	3563.81	1.97617	0.499089	3.95956	7.50884e-05	0.00195383
TCONS_00004569	235.639	1.40027	0.353861	3.95712	7.58592e-05	0.0019672
TCONS_00011378	66.377	2.00047	0.505715	3.95572	7.63044e-05	0.00197206
TCONS_00004461	83.1978	-1.35806	0.343514	-3.95345	7.7033e-05	0.00198418
TCONS_00007143	38.1003	1.94798	0.493342	3.94854	7.86284e-05	0.00201173
TCONS_00007975	600.069	1.51486	0.383617	3.94887	7.85204e-05	0.00201173
TCONS_00005104	48.8136	1.84364	0.467079	3.94718	7.90771e-05	0.00201647
TCONS_00003186	427.365	1.47548	0.374239	3.9426	8.06014e-05	0.00204695
TCONS_00007014	147.144	1.9724	0.500355	3.94199	8.08077e-05	0.00204695
TCONS_00003492	149.795	1.74291	0.442373	3.9399	8.15152e-05	0.00205806
TCONS_00001687	37.9668	2.17234	0.551869	3.93634	8.2734e-05	0.00207084
TCONS_00006518	698.601	2.11364	0.536995	3.93605	8.28337e-05	0.00207084
TCONS_00007394	91.9218	1.32479	0.336489	3.9371	8.24737e-05	0.00207084
TCONS_00016251	230.771	2.0025	0.508978	3.93435	8.34228e-05	0.00207878
TCONS_00006411	161.394	1.39615	0.355125	3.93142	8.44456e-05	0.00209743
TCONS_00005432	814.728	1.67863	0.427215	3.92924	8.52156e-05	0.00210971
TCONS_00004417	8.11059	2.76755	0.70478	3.92683	8.60732e-05	0.00212406
TCONS_00006111	28.4837	1.91358	0.48786	3.9224	8.76727e-05	0.00215658
TCONS_00010759	127.181	1.3049	0.332785	3.92115	8.81264e-05	0.00216079
TCONS_00007729	6370.65	2.02882	0.517717	3.91878	8.89997e-05	0.00217523
TCONS_00013811	165.259	-1.32641	0.339402	-3.90808	9.30308e-05	0.00226652
TCONS_00004513	117.912	1.42612	0.36511	3.90598	9.38424e-05	0.00227182
TCONS_00004970	259.177	1.37719	0.352545	3.90641	9.36763e-05	0.00227182
TCONS_00013676	25.3392	1.84615	0.472895	3.90393	9.46444e-05	0.00228401
TCONS_00012925	7108.67	1.85707	0.47579	3.90314	9.49537e-05	0.00228426
TCONS_00000464	13.6724	2.37182	0.607886	3.90174	9.55017e-05	0.00229025
TCONS_00003340	126.044	1.3046	0.334657	3.89831	9.68655e-05	0.00229751
TCONS_00006622	1109.3	1.76613	0.453139	3.89755	9.71691e-05	0.00229751
TCONS_00007842	56.9503	1.59654	0.409661	3.89721	9.73063e-05	0.00229751
TCONS_00008962	270.98	1.45054	0.37216	3.89762	9.71415e-05	0.00229751
TCONS_00011209	109.639	1.49975	0.384614	3.89937	9.64414e-05	0.00229751
TCONS_00004414	1356.68	2.12149	0.544489	3.8963	9.7675e-05	0.00229912
TCONS_00002213	170.628	-1.09929	0.282224	-3.8951	9.81584e-05	0.00230341
TCONS_00001431	1121.63	1.84996	0.47555	3.89016	0.000100179	0.00232234
TCONS_00001941	346.235	-1.32855	0.341434	-3.89107	9.98013e-05	0.00232234
TCONS_00005439	544.751	1.93805	0.498057	3.89123	9.9738e-05	0.00232234
TCONS_00011706	82.7159	1.3886	0.356905	3.89068	9.99637e-05	0.00232234
TCONS_00004109	29.3645	1.7685	0.454775	3.88873	0.00010077	0.00232467
TCONS_00007364	18.6521	2.72668	0.701227	3.88845	0.000100888	0.00232467
TCONS_00003371	417.72	1.61335	0.415275	3.88502	0.000102323	0.00234981
TCONS_00012898	12212.6	2.04241	0.525801	3.88438	0.000102593	0.00234981
TCONS_00005057	365.44	-1.28467	0.33088	-3.88259	0.000103351	0.00235801
TCONS_00011588	187.854	1.28213	0.330268	3.88208	0.000103567	0.00235801
TCONS_00006503	63.0736	1.79594	0.462968	3.87918	0.000104811	0.00236549
TCONS_00010879	102.567	-1.30156	0.335528	-3.87915	0.000104824	0.00236549
TCONS_00015444	37.8636	2.06468	0.532079	3.8804	0.000104285	0.00236549
TCONS_00006560	99.827	1.52404	0.392966	3.87829	0.000105193	0.00236684
TCONS_00003350	4236.44	2.09393	0.540778	3.87207	0.000107915	0.00242097
TCONS_00009483	102.958	1.3591	0.351208	3.86979	0.000108929	0.00243657
TCONS_00008194	30.5337	2.01812	0.521913	3.86678	0.000110281	0.00245962
TCONS_00008908	323.181	1.18103	0.305704	3.86331	0.000111863	0.00247327
TCONS_00013325	149.194	1.92175	0.497259	3.86469	0.000111229	0.00247327
TCONS_00015622	62.3051	1.48351	0.383998	3.86331	0.000111861	0.00247327
TCONS_00013351	215.827	-1.17246	0.303739	-3.86008	0.00011335	0.00249893
TCONS_00010651	5991.71	2.04862	0.531136	3.85705	0.000114762	0.00251556
TCONS_00016899	1113.4	2.03565	0.527695	3.85763	0.000114493	0.00251556
TCONS_00008051	1637.7	2.04494	0.530417	3.85533	0.000115572	0.00252607
TCONS_00001469	5.31767	3.07314	0.797722	3.85239	0.000116969	0.00254208
TCONS_00016196	250.326	2.12449	0.551463	3.85246	0.000116937	0.00254208
TCONS_00001408	40.1515	1.98968	0.516994	3.84856	0.000118816	0.00257492
TCONS_00000737	5.64811	2.94171	0.76681	3.8363	0.000124903	0.00265639
TCONS_00001618	1530.23	1.9356	0.504575	3.83609	0.000125007	0.00265639
TCONS_00003850	18895.6	1.98909	0.518387	3.83707	0.000124511	0.00265639
TCONS_00006326	8399.73	2.00467	0.522122	3.83946	0.000123303	0.00265639
TCONS_00006824	169.151	-1.15011	0.299664	-3.83798	0.000124048	0.00265639
TCONS_00011761	89.592	-1.36302	0.354948	-3.84004	0.000123012	0.00265639
TCONS_00016657	660.495	-1.03687	0.270111	-3.83867	0.000123702	0.00265639
TCONS_00006487	9.12161	2.59815	0.677836	3.833	0.000126589	0.00268018
TCONS_00012958	4297.47	2.0334	0.530562	3.83254	0.000126827	0.00268018
TCONS_00008783	8.62581	2.65725	0.693523	3.83152	0.000127354	0.00268392
TCONS_00002115	1736.79	1.64063	0.428392	3.82975	0.000128276	0.0026959
TCONS_00014647	292.608	-1.1334	0.296184	-3.82667	0.000129889	0.00272232
TCONS_00010163	768.52	1.77595	0.464988	3.81935	0.000133805	0.00279673
TCONS_00008919	4.5632	3.04024	0.796622	3.81642	0.000135403	0.00282244
TCONS_00008091	3471.83	2.00999	0.527121	3.81314	0.000137211	0.00285235
TCONS_00016144	100.836	-1.34617	0.353774	-3.80516	0.000141715	0.00293798
TCONS_00008526	205.219	2.01863	0.530693	3.80376	0.000142515	0.00293866
TCONS_00013011	65.8731	2.27567	0.598243	3.80392	0.000142427	0.00293866
TCONS_00004722	4110.08	1.94298	0.510917	3.80294	0.00014299	0.00294053
TCONS_00013198	43.0984	1.8884	0.497546	3.79543	0.000147388	0.00301476
TCONS_00015929	28.5161	1.98871	0.523951	3.79559	0.000147291	0.00301476
TCONS_00004590	13118.4	1.95353	0.514969	3.79349	0.000148544	0.00302223
TCONS_00012842	19.992	2.02771	0.534488	3.79375	0.000148391	0.00302223
TCONS_00005344	80.8291	1.73786	0.458408	3.79108	0.000149993	0.00303556
TCONS_00007264	43.5527	2.32571	0.613422	3.79136	0.000149824	0.00303556
TCONS_00011281	205.424	1.22709	0.323944	3.78796	0.000151888	0.00306581
TCONS_00004001	39.5754	-1.75528	0.463606	-3.78614	0.000153003	0.00308019
TCONS_00013945	15.6011	2.40237	0.634681	3.78516	0.000153612	0.00308434
TCONS_00014297	31.9727	2.24972	0.594838	3.78207	0.00015553	0.00311468
TCONS_00011349	177.492	1.59799	0.423072	3.77712	0.000158655	0.00316896
TCONS_00006433	91.424	1.65758	0.438973	3.77603	0.000159345	0.00317444
TCONS_00014136	146.432	-1.19098	0.315504	-3.77485	0.000160101	0.00318123
TCONS_00007031	276.69	-1.20461	0.319281	-3.7729	0.000161361	0.00319797
TCONS_00005242	25.3875	-1.80428	0.479252	-3.76479	0.00016669	0.00329504
TCONS_00001586	120.641	1.32022	0.351166	3.75954	0.000170229	0.00334768
TCONS_00007816	108.951	1.51271	0.402351	3.75968	0.000170134	0.00334768
TCONS_00003381	55.5592	1.61183	0.428976	3.7574	0.00017169	0.00336776
TCONS_00012016	9784.42	1.84961	0.492438	3.75602	0.000172637	0.00337768
TCONS_00008275	767.278	1.768	0.470912	3.75442	0.000173742	0.00339062
TCONS_00004491	96.3548	1.51167	0.402966	3.75136	0.000175877	0.00340045
TCONS_00008804	67.8592	1.34697	0.35894	3.75263	0.000174987	0.00340045
TCONS_00013480	81.7999	-2.07292	0.552467	-3.75212	0.000175348	0.00340045
TCONS_00015982	73.4553	-1.5516	0.413634	-3.75115	0.000176023	0.00340045
TCONS_00005052	411.348	1.46771	0.391505	3.7489	0.000177614	0.00342253
TCONS_00012278	115.039	1.81308	0.483751	3.74797	0.000178274	0.00342663
TCONS_00015324	258.809	-1.39765	0.373108	-3.74596	0.000179705	0.00344547
TCONS_00002149	505.921	1.6017	0.427698	3.74494	0.00018044	0.00345092
TCONS_00006345	289.74	1.2648	0.33792	3.7429	0.000181906	0.00347029
TCONS_00000185	71.1414	-1.42439	0.381052	-3.73803	0.000185466	0.00350705
TCONS_00007342	419.418	1.81597	0.485855	3.73768	0.000185725	0.00350705
TCONS_00008893	37.3032	1.80991	0.484055	3.73905	0.000184717	0.00350705
TCONS_00009981	78.2277	1.68332	0.450323	3.73804	0.000185464	0.00350705
TCONS_00015093	247.023	1.43806	0.384803	3.73714	0.000186126	0.00350705
TCONS_00008365	47.6499	1.73951	0.465741	3.73494	0.000187761	0.00352916
TCONS_00007592	207.164	1.56036	0.418115	3.7319	0.000190043	0.0035373
TCONS_00011316	144.111	-1.35729	0.363637	-3.73254	0.000189557	0.0035373
TCONS_00012126	469.816	1.56934	0.420388	3.73308	0.000189152	0.0035373
TCONS_00015492	449.074	-1.07127	0.28703	-3.73226	0.000189773	0.0035373
TCONS_00002450	1798	1.88498	0.505395	3.72972	0.000191694	0.00355076
TCONS_00010917	18.3114	2.05206	0.550139	3.73006	0.000191431	0.00355076
TCONS_00008498	36.7365	1.70268	0.456878	3.72678	0.000193943	0.00357717
TCONS_00009738	409.609	1.51189	0.405698	3.72663	0.000194056	0.00357717
TCONS_00000275	259.406	1.5047	0.403966	3.72482	0.000195451	0.00357737
TCONS_00003170	1205.41	1.63101	0.437897	3.72464	0.000195597	0.00357737
TCONS_00008080	17.3703	2.50321	0.672039	3.7248	0.00019547	0.00357737
TCONS_00013463	22.1816	1.89325	0.508365	3.7242	0.000195937	0.00357737
TCONS_00007714	8729.29	1.93699	0.520373	3.7223	0.000197414	0.00358197
TCONS_00010435	7460.2	1.99932	0.537114	3.72234	0.000197384	0.00358197
TCONS_00010723	7357.1	1.92464	0.517087	3.72207	0.000197594	0.00358197
TCONS_00007223	6119.22	1.91069	0.513549	3.72057	0.000198775	0.00359487
TCONS_00003801	40.9893	1.59654	0.4297	3.71548	0.000202819	0.00365935
TCONS_00016276	28.2922	1.90709	0.513799	3.71174	0.000205842	0.00370515
TCONS_00014027	1224.95	1.37552	0.370681	3.71079	0.000206617	0.00371038
TCONS_00014821	138.129	1.37907	0.371739	3.70977	0.000207447	0.00371656
TCONS_00008595	231.181	1.35776	0.366106	3.70866	0.000208358	0.00372416
TCONS_00007337	87.4664	2.2073	0.596052	3.70319	0.000212905	0.00379103
TCONS_00007644	31.8146	1.66576	0.449844	3.70297	0.000213091	0.00379103
TCONS_00006160	303.345	-1.21011	0.326858	-3.70225	0.000213692	0.00379292
TCONS_00007004	22.0653	2.24227	0.605775	3.70148	0.000214343	0.00379372
TCONS_00007724	7730.9	1.9573	0.528853	3.70103	0.000214729	0.00379372
TCONS_00004988	1920.87	1.70233	0.460475	3.6969	0.000218249	0.00384702
TCONS_00015809	49.6999	1.61145	0.436093	3.6952	0.000219711	0.00386388
TCONS_00015058	148.112	1.91016	0.517989	3.68765	0.000226338	0.0039713
TCONS_00010108	25.999	2.41974	0.656337	3.68673	0.000227153	0.00397647
TCONS_00005793	592.249	1.44536	0.39262	3.68132	0.000232029	0.00405256
TCONS_00015091	39.9705	1.68551	0.457995	3.68019	0.000233061	0.00406131
TCONS_00004496	932.735	1.97405	0.536763	3.6777	0.000235348	0.00408257
TCONS_00009499	15886.7	1.913	0.520128	3.67795	0.000235117	0.00408257
TCONS_00001636	1681.52	2.11933	0.576609	3.67551	0.000237374	0.00410555
TCONS_00013649	2818.98	1.94037	0.527976	3.67511	0.000237746	0.00410555
TCONS_00004040	5122.49	1.94153	0.52904	3.6699	0.000242644	0.00417129
TCONS_00010718	512.008	-0.957219	0.260818	-3.67007	0.000242484	0.00417129
TCONS_00001922	231.3	1.61874	0.441261	3.66845	0.000244026	0.00417225
TCONS_00004837	1182.15	1.72144	0.469298	3.66813	0.000244335	0.00417225
TCONS_00015270	597.126	1.19648	0.326133	3.66868	0.000243809	0.00417225
TCONS_00009670	508.801	1.92324	0.5245	3.66681	0.000245598	0.00417517
TCONS_00016617	27.8641	1.87573	0.511506	3.66708	0.000245333	0.00417517
TCONS_00013326	323.675	-1.10251	0.300754	-3.66582	0.00024655	0.00418206
TCONS_00007781	21.1611	-2.02784	0.553949	-3.6607	0.00025153	0.0042477
TCONS_00008651	3334.64	1.88369	0.514572	3.6607	0.00025153	0.0042477
TCONS_00005255	1362.36	1.78674	0.488311	3.65902	0.000253181	0.00425038
TCONS_00007894	1296.86	1.66292	0.45455	3.6584	0.000253795	0.00425038
TCONS_00009133	3551.94	1.60538	0.438723	3.65922	0.000252979	0.00425038
TCONS_00011533	63.9391	1.47856	0.404168	3.65828	0.000253912	0.00425038
TCONS_00003211	2950.54	1.2292	0.336226	3.65587	0.00025631	0.00426842
TCONS_00005930	10494.2	1.90741	0.52179	3.65552	0.000256663	0.00426842
TCONS_00012716	27.5482	2.16837	0.593094	3.65603	0.000256154	0.00426842
TCONS_00004229	34.037	1.69802	0.464636	3.65452	0.00025766	0.00427571
TCONS_00008779	107.818	1.57725	0.431663	3.65388	0.000258305	0.00427713
TCONS_00014441	7041.12	-1.26896	0.347547	-3.65119	0.000261027	0.00431286
TCONS_00007868	22.7687	2.14741	0.588301	3.65019	0.00026205	0.00432043
TCONS_00013180	70.9417	1.66883	0.457816	3.64521	0.000267174	0.00439544
TCONS_00008195	2845.41	1.88884	0.518432	3.64338	0.000269082	0.00440788
TCONS_00010831	111.341	-1.45473	0.39924	-3.64375	0.000268696	0.00440788
TCONS_00011338	73.2341	1.48843	0.408632	3.64247	0.000270037	0.00441407
TCONS_00003258	250.232	-1.06324	0.292276	-3.63781	0.000274967	0.00448507
TCONS_00006719	398.237	-0.976191	0.268392	-3.63719	0.00027563	0.00448632
TCONS_00000980	5875.97	1.92666	0.530311	3.63308	0.000280059	0.00451994
TCONS_00010482	2544.57	1.93991	0.533827	3.63397	0.000279098	0.00451994
TCONS_00013343	67.7208	1.25569	0.345578	3.63358	0.000279513	0.00451994
TCONS_00015897	79.9237	-1.39125	0.382861	-3.63384	0.000279238	0.00451994
TCONS_00007152	95.1467	1.34326	0.369902	3.63141	0.000281879	0.00453019
TCONS_00009361	144.622	-1.10433	0.304072	-3.63181	0.000281441	0.00453019
TCONS_00003032	1981.93	1.91431	0.527696	3.62768	0.000285974	0.00457237
TCONS_00012218	49.2594	-1.51561	0.417751	-3.62802	0.000285603	0.00457237
TCONS_00014357	27.3134	1.95087	0.537816	3.62739	0.000286296	0.00457237
TCONS_00016082	21.2043	-1.97175	0.543704	-3.62652	0.000287269	0.00457835
TCONS_00016886	25.2419	-1.78258	0.491814	-3.62449	0.000289531	0.00460481
TCONS_00014432	321.698	1.50658	0.415734	3.62391	0.000290187	0.00460566
TCONS_00003879	160.337	1.33311	0.367958	3.623	0.000291207	0.00461228
TCONS_00007514	2015.81	1.74875	0.482928	3.62115	0.000293295	0.00462977
TCONS_00011539	2528.26	1.71861	0.47463	3.62095	0.000293521	0.00462977
TCONS_00011867	9503.71	1.94575	0.538048	3.61632	0.000298827	0.00470375
TCONS_00016677	5781.61	-0.883853	0.244511	-3.61477	0.000300611	0.00472212
TCONS_00014833	2575.45	1.91483	0.529849	3.61391	0.00030161	0.0047281
TCONS_00014286	60.3955	-1.56638	0.433685	-3.6118	0.000304078	0.00475704
TCONS_00014682	23.5477	2.28379	0.632811	3.60896	0.000307422	0.00479954
TCONS_00005400	66.2003	2.01115	0.557454	3.60774	0.000308877	0.00480281
TCONS_00005536	15.0005	2.17998	0.604293	3.60749	0.000309171	0.00480281
TCONS_00012817	12222.2	1.89168	0.524494	3.60668	0.000310142	0.00480281
TCONS_00013870	45.943	1.37124	0.380187	3.60676	0.000310044	0.00480281
TCONS_00015184	45025.7	1.59938	0.44447	3.59839	0.00032019	0.00494839
TCONS_00000071	177.778	1.18622	0.329904	3.59566	0.000323572	0.00497623
TCONS_00007176	124.016	1.42236	0.39561	3.59536	0.000323943	0.00497623
TCONS_00012431	72.5998	-1.45682	0.405103	-3.59618	0.00032293	0.00497623
TCONS_00001760	50.1359	1.37828	0.383431	3.59461	0.000324883	0.00498067
TCONS_00003069	1853.03	1.91573	0.533501	3.59087	0.000329573	0.00502453
TCONS_00007864	6215.88	1.59561	0.444367	3.59076	0.000329714	0.00502453
TCONS_00015990	7610.21	1.92164	0.535068	3.5914	0.00032891	0.00502453
TCONS_00003755	467.236	-1.07812	0.30034	-3.58968	0.000331086	0.00503541
TCONS_00007374	249.401	1.41116	0.393326	3.58777	0.000333522	0.00506238
TCONS_00013808	364.346	-0.926665	0.258504	-3.58472	0.000337438	0.00511168
TCONS_00001499	126.889	1.28796	0.359642	3.58122	0.000341991	0.00517042
TCONS_00005782	84.7346	-1.21434	0.33916	-3.58043	0.000343029	0.00517589
TCONS_00001945	725.837	1.37969	0.385974	3.57458	0.000350789	0.00526553
TCONS_00003634	12.1743	-2.26645	0.634169	-3.57389	0.000351723	0.00526553
TCONS_00008912	3695.71	1.00322	0.280638	3.57479	0.000350511	0.00526553
TCONS_00012345	86.0106	-1.32907	0.371832	-3.57438	0.000351061	0.00526553
TCONS_00010716	5293.6	1.88383	0.527515	3.57113	0.000355444	0.00531083
TCONS_00002787	1884.25	1.94599	0.545179	3.56945	0.000357736	0.00532567
TCONS_00006798	6715.56	1.57909	0.442463	3.56887	0.000358525	0.00532567
TCONS_00012464	182.892	-1.10995	0.310991	-3.56908	0.00035824	0.00532567
TCONS_00015928	128.532	1.55004	0.434517	3.56727	0.000360721	0.0053479
TCONS_00007063	29.8305	1.89383	0.531155	3.5655	0.000363159	0.00536741
TCONS_00008451	232.18	1.77932	0.499067	3.5653	0.00036344	0.00536741
TCONS_00002513	23.8583	1.94749	0.546665	3.56249	0.000367359	0.00541483
TCONS_00004905	154.823	1.52935	0.42936	3.56192	0.000368157	0.00541616
TCONS_00002157	130.956	1.63118	0.458205	3.55993	0.000370959	0.0054469
TCONS_00013192	77.8854	1.64712	0.462764	3.5593	0.000371839	0.00544937
TCONS_00003809	157.847	1.49594	0.420449	3.55796	0.000373749	0.00546688
TCONS_00005554	317.461	1.61553	0.454246	3.55652	0.000375806	0.00548546
TCONS_00011974	292.458	1.28188	0.360477	3.55606	0.000376453	0.00548546
TCONS_00015808	46.5045	2.00414	0.563778	3.55483	0.000378217	0.00549748
TCONS_00016925	252.347	1.71327	0.482003	3.55449	0.000378715	0.00549748
TCONS_00016092	714.948	-1.02504	0.288642	-3.55124	0.00038342	0.00554473
TCONS_00016663	10.1529	2.35737	0.663771	3.55148	0.000383065	0.00554473
TCONS_00004495	6610.44	1.80402	0.508191	3.54989	0.000385392	0.00556274
TCONS_00014480	28.0841	1.78988	0.504695	3.54647	0.000390428	0.00562481
TCONS_00003111	597.32	1.03213	0.291078	3.54587	0.00039132	0.00562707
TCONS_00006286	252.547	1.72551	0.486851	3.54422	0.00039378	0.00565182
TCONS_00004468	48.8756	1.53282	0.432749	3.54205	0.000397027	0.00568076
TCONS_00011240	79.5892	1.41024	0.398162	3.54188	0.000397282	0.00568076
TCONS_00001940	63.1006	1.51087	0.427262	3.53617	0.000405979	0.00579428
TCONS_00015344	195.338	-1.0473	0.296231	-3.53543	0.000407111	0.00579963
TCONS_00007888	38.7828	1.73098	0.489695	3.5348	0.000408081	0.00580263
TCONS_00000307	231.151	1.04361	0.295372	3.53322	0.000410538	0.00582674
TCONS_00015704	13.613	2.07703	0.589239	3.52494	0.000423578	0.00600069
TCONS_00000510	192.545	1.85728	0.527106	3.52353	0.000425833	0.00602148
TCONS_00000347	96.0751	1.19872	0.340501	3.52047	0.000430775	0.00608013
TCONS_00015824	6.49647	2.70917	0.770338	3.51686	0.000436685	0.00615219
TCONS_00014489	37.4876	1.92323	0.546953	3.51627	0.00043766	0.0061546
TCONS_00010675	1070.94	1.86669	0.530959	3.51569	0.00043861	0.00615663
TCONS_00000990	65.1621	1.43135	0.407316	3.51409	0.000441265	0.00617126
TCONS_00004271	1295.05	-0.93624	0.266413	-3.51424	0.00044101	0.00617126
TCONS_00006656	2958.62	1.849	0.526549	3.51154	0.000445519	0.00621574
TCONS_00009035	18.0816	1.92855	0.549254	3.51121	0.00044607	0.00621574
TCONS_00005714	50.5112	1.49374	0.425515	3.51043	0.000447388	0.00622276
TCONS_00015552	129.447	1.93187	0.550724	3.50787	0.000451716	0.00627156
TCONS_00016930	4.64563	2.8194	0.804196	3.50587	0.000455123	0.00630741
TCONS_00005544	52.2728	-1.34216	0.383274	-3.50182	0.000462097	0.00639248
TCONS_00011379	108.34	1.49782	0.427876	3.50059	0.000464229	0.00641039
TCONS_00011472	510.049	-0.98707	0.282377	-3.49557	0.000473042	0.00652031
TCONS_00005193	9410.58	1.77478	0.507803	3.49501	0.000474038	0.00652229
TCONS_00016156	640.632	1.80446	0.516382	3.49443	0.000475078	0.00652486
TCONS_00000309	1013.33	1.29947	0.372182	3.49149	0.000480332	0.00658519
TCONS_00013794	33.9887	2.02981	0.581491	3.4907	0.000481756	0.0065929
TCONS_00011116	28.9543	-1.9555	0.560577	-3.48838	0.000485962	0.00663859
TCONS_00014335	444.863	-1.03349	0.296332	-3.4876	0.000487379	0.00664607
TCONS_00008663	50.1868	1.55969	0.44776	3.48332	0.000495236	0.0067412
TCONS_00004464	182.395	-1.12328	0.322684	-3.48106	0.00049944	0.00676831
TCONS_00007718	6479.67	1.85703	0.533649	3.47987	0.000501651	0.00676831
TCONS_00010677	3308.79	1.62777	0.467692	3.48044	0.000500598	0.00676831
TCONS_00010969	4688.45	1.83486	0.527123	3.4809	0.000499735	0.00676831
TCONS_00013630	142.924	-1.14639	0.329413	-3.4801	0.000501221	0.00676831
TCONS_00014349	331.519	1.30726	0.375776	3.47882	0.000503619	0.00678289
TCONS_00010220	4.52326	2.7245	0.783956	3.47532	0.000510243	0.00686003
TCONS_00000583	25.3097	1.65021	0.474944	3.47453	0.000511743	0.00686103
TCONS_00010440	3008.51	1.83503	0.528188	3.47421	0.000512365	0.00686103
TCONS_00010633	245.018	1.33646	0.384758	3.4735	0.000513715	0.00686103
TCONS_00015719	19.1093	1.8078	0.52047	3.4734	0.000513905	0.00686103
TCONS_00006035	59.2782	-1.24821	0.359414	-3.4729	0.000514863	0.00686185
TCONS_00015998	429.19	-0.91988	0.264952	-3.47187	0.000516851	0.00687636
TCONS_00014426	3475.78	1.82164	0.524828	3.47093	0.000518663	0.00688849
TCONS_00004377	365.381	1.55945	0.449437	3.46978	0.000520887	0.00690604
TCONS_00005139	713.872	-1.02479	0.295391	-3.46925	0.000521907	0.00690759
TCONS_00003584	81.2863	1.42713	0.411605	3.46723	0.000525844	0.00694602
TCONS_00007378	13.5074	2.00305	0.577853	3.46637	0.000527534	0.00694602
TCONS_00012189	120.031	1.91175	0.55149	3.46652	0.000527236	0.00694602
TCONS_00004723	310.556	-0.972835	0.28074	-3.46525	0.000529731	0.00695364
TCONS_00007613	148.595	1.64531	0.474816	3.46515	0.000529931	0.00695364
TCONS_00009675	291.566	1.27192	0.367129	3.46451	0.000531197	0.00695832
TCONS_00003183	21.22	1.88933	0.545431	3.46393	0.000532348	0.00696148
TCONS_00008447	374.738	-0.98838	0.285435	-3.46272	0.000534748	0.00698092
TCONS_00010643	164.356	1.18818	0.343732	3.45671	0.000546821	0.00711425
TCONS_00013087	28.4842	1.60988	0.465709	3.45684	0.000546544	0.00711425
TCONS_00008942	55.1181	1.68232	0.486979	3.45461	0.000551093	0.00715766
TCONS_00009403	155.844	-1.05348	0.305125	-3.45263	0.000555157	0.00719822
TCONS_00013397	47.4133	1.31291	0.380587	3.4497	0.000561207	0.00726436
TCONS_00016447	259.534	-0.924787	0.26828	-3.44709	0.000566655	0.00732248
TCONS_00005412	2302.68	1.90897	0.554142	3.44491	0.000571241	0.0073693
TCONS_00001244	98.0332	-1.17198	0.340792	-3.43899	0.00058389	0.00751979
TCONS_00002603	84.8411	1.31755	0.383485	3.43572	0.000590972	0.00759821
TCONS_00007856	7369.08	1.85897	0.541352	3.43394	0.000594875	0.00763556
TCONS_00002737	203.43	1.25538	0.365737	3.43248	0.000598095	0.00766403
TCONS_00006561	23.9592	1.80009	0.524658	3.43098	0.000601416	0.0076937
TCONS_00014878	284.222	1.54891	0.451787	3.42841	0.000607122	0.00775373
TCONS_00006665	120.773	-1.01678	0.296664	-3.42737	0.000609457	0.00777058
TCONS_00000072	99.7048	1.36465	0.39839	3.4254	0.000613895	0.00777091
TCONS_00001837	47588.5	0.907669	0.2649	3.42646	0.000611515	0.00777091
TCONS_00004287	237.553	1.33904	0.390876	3.42574	0.000613116	0.00777091
TCONS_00011807	142.977	1.55566	0.454193	3.4251	0.000614562	0.00777091
TCONS_00014664	672.374	-1.07181	0.312839	-3.42609	0.000612338	0.00777091
TCONS_00009891	6.12411	-2.61548	0.764081	-3.42304	0.000619254	0.00780444
TCONS_00013163	251.591	1.32173	0.386115	3.42316	0.000618973	0.00780444
TCONS_00015463	3429.16	-0.85524	0.249884	-3.42254	0.000620387	0.00780586
TCONS_00002472	677.815	1.77904	0.519888	3.42196	0.000621724	0.00780983
TCONS_00009220	202.593	1.54514	0.452005	3.41841	0.000629891	0.00789945
TCONS_00005443	66.9946	1.35115	0.395498	3.41633	0.000634724	0.00793405
TCONS_00008169	249.021	1.34918	0.394906	3.41646	0.000634407	0.00793405
TCONS_00003064	309.966	1.12178	0.328677	3.41302	0.000642466	0.00799164
TCONS_00007623	211.669	1.44624	0.423661	3.41367	0.000640951	0.00799164
TCONS_00014689	8.73493	2.64418	0.774644	3.41342	0.000641531	0.00799164
TCONS_00009315	27.0822	2.01263	0.589913	3.41174	0.000645486	0.00801618
TCONS_00006082	285.581	1.28253	0.376199	3.40918	0.000651596	0.00805732
TCONS_00011429	176.542	-0.946021	0.277505	-3.40902	0.000651958	0.00805732
TCONS_00014989	789.63	1.84152	0.540172	3.40914	0.000651676	0.00805732
TCONS_00010501	116.055	1.4054	0.412363	3.40817	0.000654007	0.0080696
TCONS_00001111	618.887	1.29999	0.381524	3.40736	0.000655935	0.00808036
TCONS_00009583	176.762	1.63106	0.479046	3.40481	0.000662113	0.00814335
TCONS_00011019	57.2679	1.49074	0.438075	3.40293	0.000666669	0.00818623
TCONS_00003787	54.3975	1.55517	0.457367	3.40026	0.000673208	0.00824351
TCONS_00015673	1470.91	1.76449	0.518946	3.40015	0.000673489	0.00824351
TCONS_00012855	117.077	1.99529	0.586936	3.3995	0.000675082	0.00824981
TCONS_00011736	472.448	1.31639	0.387398	3.39803	0.000678731	0.00828116
TCONS_00008549	69.9316	-1.43611	0.423034	-3.39478	0.000686839	0.00836675
TCONS_00005000	32.9608	-1.48851	0.43881	-3.39214	0.000693477	0.00843419
TCONS_00013909	71.2169	-1.27794	0.376797	-3.39158	0.000694908	0.00843816
TCONS_00013606	113.401	1.35278	0.398988	3.39053	0.000697577	0.00845716
TCONS_00015325	51.4019	1.65489	0.488207	3.38973	0.000699619	0.00846849
TCONS_00009045	93.9296	-1.12194	0.331231	-3.38718	0.000706147	0.00853401
TCONS_00000788	116.948	1.27932	0.377988	3.38456	0.000712935	0.00860245
TCONS_00005613	197.843	1.64952	0.487495	3.38367	0.000715241	0.00861668
TCONS_00000093	111.221	1.07289	0.317881	3.37513	0.000737801	0.00881702
TCONS_00000432	20.7917	2.10918	0.624986	3.37477	0.000738785	0.00881702
TCONS_00003618	200.294	-1.04439	0.30935	-3.37607	0.000735305	0.00881702
TCONS_00005100	77.6858	1.59391	0.472282	3.3749	0.000738413	0.00881702
TCONS_00006273	19.6913	1.87726	0.556179	3.37528	0.000737417	0.00881702
TCONS_00010809	1163.47	1.6695	0.494529	3.37594	0.000735632	0.00881702
TCONS_00009687	43.2818	1.4077	0.417348	3.37296	0.000743657	0.00886133
TCONS_00016726	481.21	-0.911124	0.27021	-3.37191	0.000746497	0.00888134
TCONS_00003558	96.6555	-1.11841	0.33175	-3.37126	0.000748253	0.00888841
TCONS_00009832	144.689	1.32295	0.392499	3.37059	0.000750061	0.00889607
TCONS_00003891	62.8924	1.61458	0.479153	3.36966	0.000752623	0.00889891
TCONS_00009756	170.592	1.28404	0.381098	3.36931	0.000753564	0.00889891
TCONS_00014342	10.8302	2.27845	0.676338	3.3688	0.000754953	0.00889891
TCONS_00015656	53.6815	1.51134	0.448617	3.36888	0.000754747	0.00889891
TCONS_00001300	42.3347	-1.5106	0.448842	-3.36555	0.000763903	0.00892252
TCONS_00001549	54.6625	1.54699	0.459597	3.36596	0.000762778	0.00892252
TCONS_00003443	150.46	-1.04468	0.310305	-3.36662	0.000760962	0.00892252
TCONS_00004743	87.0487	1.24281	0.369072	3.36739	0.000758822	0.00892252
TCONS_00010791	157.057	1.36498	0.405402	3.36697	0.000759977	0.00892252
TCONS_00014047	120.655	1.82534	0.542362	3.36553	0.000763954	0.00892252
TCONS_00004996	223.934	-1.0108	0.300604	-3.36255	0.000772261	0.00900579
TCONS_00011172	120.922	-1.23736	0.368298	-3.35967	0.000780365	0.00908644
TCONS_00004987	1025.36	1.68028	0.500344	3.35824	0.000784403	0.0091099
TCONS_00006127	660.742	1.14956	0.342324	3.35811	0.000784761	0.0091099
TCONS_00001188	675.341	1.53271	0.456679	3.3562	0.000790216	0.00915932
TCONS_00012543	141.266	1.80883	0.539095	3.35531	0.000792755	0.00917485
TCONS_00009789	128.024	-1.2682	0.378289	-3.35247	0.000800928	0.00925544
TCONS_00006852	33.8419	-1.45589	0.434388	-3.3516	0.000803473	0.00927084
TCONS_00007851	27.3564	2.05828	0.614526	3.34937	0.000809957	0.00933158
TCONS_00008941	12.4637	2.24819	0.671335	3.34884	0.00081151	0.00933542
TCONS_00008897	676.206	1.0482	0.31309	3.34793	0.000814179	0.00933803
TCONS_00012594	283.397	-0.943438	0.281791	-3.348	0.000813962	0.00933803
TCONS_00011787	10.9217	2.10646	0.629376	3.3469	0.000817196	0.00934462
TCONS_00015451	35.9492	-1.53941	0.459927	-3.34708	0.000816685	0.00934462
TCONS_00014287	71.4632	-1.14572	0.342434	-3.34581	0.000820434	0.00936765
TCONS_00004195	37.4565	1.33492	0.399275	3.34336	0.000827691	0.00941189
TCONS_00004570	164.185	1.45713	0.436046	3.34169	0.000832704	0.00941189
TCONS_00006735	205.4	-0.909794	0.272246	-3.34181	0.00083234	0.00941189
TCONS_00006939	149.738	1.36013	0.406781	3.34364	0.000826877	0.00941189
TCONS_00011509	12.7246	1.98933	0.595087	3.34291	0.000829036	0.00941189
TCONS_00014253	471.161	-0.845248	0.252946	-3.34162	0.000832922	0.00941189
TCONS_00016445	9.48748	2.36596	0.707853	3.34245	0.000830426	0.00941189
TCONS_00002753	12.3336	2.11661	0.633943	3.33881	0.000841386	0.00949351
TCONS_00010107	24.2054	2.16797	0.649522	3.33779	0.000844471	0.00951429
TCONS_00007743	77.7549	1.3082	0.392008	3.33719	0.000846312	0.00952101
TCONS_00010573	62.546	1.46456	0.439084	3.33548	0.000851519	0.00952804
TCONS_00012035	59.3953	1.31925	0.395447	3.33609	0.00084966	0.00952804
TCONS_00012959	37.3311	1.81819	0.545126	3.33535	0.000851919	0.00952804
TCONS_00013688	275.991	1.32005	0.395644	3.33646	0.000848521	0.00952804
TCONS_00016946	23.951	-1.63875	0.491775	-3.33231	0.000861289	0.00961877
TCONS_00001306	113.455	1.14489	0.344056	3.32763	0.000875872	0.00972485
TCONS_00005293	377.676	1.71458	0.515103	3.32862	0.000872761	0.00972485
TCONS_00009700	274.125	-0.917834	0.275774	-3.32821	0.000874075	0.00972485
TCONS_00015381	16935.9	1.8027	0.54171	3.3278	0.000875357	0.00972485
TCONS_00015406	598.917	-0.853939	0.256951	-3.32336	0.000889411	0.00986086
TCONS_00015925	83.8673	1.64236	0.49444	3.32165	0.000894875	0.00990708
TCONS_00014005	366.383	1.41626	0.426505	3.32063	0.000898161	0.00992909
TCONS_00013949	444.708	1.79777	0.541473	3.32015	0.000899686	0.0099316
TCONS_00000222	241.66	1.43051	0.431057	3.31861	0.000904663	0.00996859
TCONS_00010634	74.9127	1.87509	0.565075	3.31831	0.000905643	0.00996859
TCONS_00007615	26.6948	-1.70035	0.513122	-3.31374	0.000920562	0.0101182
TCONS_00013740	58.2704	-1.22018	0.368326	-3.31278	0.000923748	0.0101387
TCONS_00000292	192.065	-1.1204	0.338864	-3.30636	0.00094518	0.0103591
TCONS_00000843	105.378	1.46893	0.444508	3.30462	0.000951061	0.0104086
TCONS_00001531	1203.77	1.45686	0.441167	3.30228	0.000959029	0.0104341
TCONS_00004656	305.405	1.0651	0.32257	3.30193	0.000960209	0.0104341
TCONS_00005198	196.423	1.61005	0.487486	3.30276	0.000957373	0.0104341
TCONS_00009194	129.167	-1.16456	0.352682	-3.30202	0.000959919	0.0104341
TCONS_00013057	3880.46	1.53114	0.463622	3.30255	0.000958091	0.0104341
TCONS_00000219	177.117	1.16782	0.353729	3.30147	0.000961803	0.0104366
TCONS_00011972	89.0369	-1.12735	0.341955	-3.29677	0.000978027	0.0105976
TCONS_00003389	135.791	1.28344	0.389595	3.29428	0.000986732	0.0106467
TCONS_00012571	78.8371	1.3975	0.424121	3.29504	0.000984063	0.0106467
TCONS_00014491	34.6315	1.82088	0.552696	3.29454	0.000985838	0.0106467
TCONS_00002581	1024.13	1.23622	0.37562	3.29114	0.000997819	0.010736
TCONS_00005451	148.979	-1.09731	0.333379	-3.29148	0.000996625	0.010736
TCONS_00012220	106.368	1.20294	0.365768	3.28881	0.00100611	0.0108101
TCONS_00002923	30.5947	1.58666	0.482893	3.28574	0.00101714	0.0109132
TCONS_00010273	97.9441	-1.12452	0.342357	-3.28463	0.00102115	0.0109371
TCONS_00011278	35.4797	1.45793	0.443903	3.28434	0.00102223	0.0109371
TCONS_00012042	4.11214	-2.63961	0.804069	-3.28281	0.00102777	0.0109811
TCONS_00002144	54.0577	1.37267	0.41832	3.28138	0.001033	0.0110215
TCONS_00002813	259.534	-0.912309	0.278143	-3.28	0.00103807	0.0110602
TCONS_00005701	85.4702	1.62197	0.494614	3.27928	0.00104074	0.0110732
TCONS_00010493	129.823	1.11787	0.341011	3.27811	0.00104506	0.0111037
TCONS_00013196	4.72949	2.57577	0.786179	3.27632	0.0010517	0.0111588
TCONS_00002401	52.6889	1.25302	0.382507	3.27581	0.00105358	0.0111633
TCONS_00005752	41.8088	-1.37824	0.421053	-3.27333	0.00106289	0.0112463
TCONS_00003876	260.341	1.43067	0.437352	3.27122	0.00107084	0.0112837
TCONS_00006000	74.7095	1.74334	0.532894	3.27147	0.00106991	0.0112837
TCONS_00013582	300.634	-0.887749	0.271351	-3.27159	0.00106944	0.0112837
TCONS_00011581	59.7849	1.66369	0.508791	3.26988	0.00107591	0.0113215
TCONS_00006264	51.0163	1.6308	0.498884	3.2689	0.00107967	0.0113454
TCONS_00011593	117.4	1.51369	0.46323	3.26769	0.00108428	0.0113782
TCONS_00011802	182.798	1.24029	0.37966	3.26684	0.00108756	0.011397
TCONS_00006810	3365.07	1.80912	0.554079	3.26509	0.00109428	0.0114518
TCONS_00008895	318.934	-0.961772	0.294628	-3.26436	0.00109713	0.0114659
TCONS_00006153	564.709	-1.06537	0.326484	-3.26316	0.00110176	0.0114986
TCONS_00010010	94.4216	-1.0809	0.331342	-3.2622	0.00110552	0.0115222
TCONS_00006816	5388.87	1.32175	0.405282	3.2613	0.00110902	0.0115429
TCONS_00010539	52.5029	1.45168	0.445241	3.26043	0.00111243	0.0115627
TCONS_00014040	270.559	-0.964811	0.296064	-3.2588	0.00111886	0.0116137
TCONS_00004105	30.7278	1.83557	0.563371	3.25818	0.00112128	0.011623
TCONS_00004877	99.6718	1.43685	0.441251	3.2563	0.00112875	0.0116846
TCONS_00001526	57.3348	-1.37526	0.422529	-3.25481	0.00113466	0.01173
TCONS_00016078	23.8493	-1.541	0.473565	-3.25404	0.00113776	0.0117461
TCONS_00015881	142.752	1.06945	0.328782	3.25277	0.00114288	0.011783
TCONS_00013838	68.5417	1.65858	0.510197	3.25085	0.00115059	0.0118465
TCONS_00001977	210.032	1.19232	0.366942	3.24936	0.00115666	0.0118612
TCONS_00006785	25.3654	1.71203	0.526873	3.24942	0.00115643	0.0118612
TCONS_00010907	129.252	-1.12119	0.344972	-3.25011	0.00115362	0.0118612
TCONS_00000011	29.0761	1.86062	0.573076	3.24673	0.00116741	0.0119536
TCONS_00010654	93.7061	1.66566	0.513081	3.24639	0.00116879	0.0119536
TCONS_00011480	47.6904	1.69997	0.523867	3.24504	0.00117433	0.0119941
TCONS_00005186	153.701	1.023	0.315391	3.24359	0.00118034	0.0120395
TCONS_00013616	88.027	-1.28067	0.395078	-3.24155	0.00118881	0.0121097
TCONS_00005715	18.9792	2.10791	0.650861	3.23864	0.001201	0.0121739
TCONS_00008840	129.436	-1.03734	0.320242	-3.23925	0.00119847	0.0121739
TCONS_00011064	293.892	1.29122	0.398581	3.23953	0.00119728	0.0121739
TCONS_00011405	122.266	1.43048	0.441707	3.23853	0.00120148	0.0121739
TCONS_00005727	2998.6	1.34843	0.416449	3.23793	0.001204	0.0121833
TCONS_00005872	416.385	1.17361	0.362803	3.23485	0.00121707	0.0122993
TCONS_00010819	66.6835	-1.13296	0.35091	-3.22864	0.00124382	0.0125531
TCONS_00002286	6.57782	2.40078	0.74371	3.22811	0.00124612	0.0125597
TCONS_00003122	565.898	1.44544	0.448146	3.22538	0.00125804	0.0126632
TCONS_00009677	291.717	-0.991619	0.307642	-3.22329	0.00126729	0.0127395
TCONS_00004838	134.888	-0.97763	0.303349	-3.22279	0.00126949	0.0127449
TCONS_00009894	60.3591	1.56863	0.486826	3.22216	0.00127228	0.0127561
TCONS_00004108	898.584	1.62903	0.505786	3.22079	0.00127839	0.0127613
TCONS_00006185	424.215	-0.919657	0.285559	-3.22055	0.00127946	0.0127613
TCONS_00010770	46.7753	-1.33967	0.415931	-3.22088	0.00127796	0.0127613
TCONS_00012236	12.8053	1.98959	0.617614	3.22141	0.00127563	0.0127613
TCONS_00009442	32.2113	1.90219	0.591053	3.2183	0.00128953	0.0128449
TCONS_00009699	193.168	1.54143	0.479208	3.21661	0.00129713	0.0129038
TCONS_00014917	124.887	1.25296	0.389654	3.21557	0.00130187	0.0129342
TCONS_00006327	76.5866	-1.34527	0.419008	-3.2106	0.00132459	0.0131428
TCONS_00004487	233.127	1.65609	0.515968	3.20969	0.0013288	0.0131675
TCONS_00008420	240.438	1.18227	0.368586	3.20758	0.00133859	0.0132473
TCONS_00001654	116.875	1.17606	0.366769	3.20654	0.00134342	0.0132609
TCONS_00013408	43.4105	1.61356	0.50317	3.20679	0.00134223	0.0132609
TCONS_00008423	82.0811	1.05638	0.32964	3.20465	0.00135229	0.0132998
TCONS_00013952	494.608	1.29726	0.404782	3.20483	0.00135143	0.0132998
TCONS_00014448	39.6495	1.98534	0.61953	3.20458	0.00135258	0.0132998
TCONS_00012937	290.859	-1.05744	0.330704	-3.19755	0.00138599	0.0136109
TCONS_00006504	843.874	-0.900762	0.282036	-3.19378	0.00140421	0.0137721
TCONS_00013445	115.064	1.14027	0.357096	3.19318	0.00140717	0.0137834
TCONS_00009078	169.714	1.29385	0.405388	3.19164	0.00141467	0.0138391
TCONS_00003985	135.989	1.14412	0.35914	3.18571	0.00144398	0.0141078
TCONS_00004246	30.9295	1.54788	0.486258	3.18324	0.00145637	0.0142107
TCONS_00005694	58.403	1.42875	0.44905	3.18172	0.00146401	0.0142659
TCONS_00007846	103.093	-1.14213	0.359005	-3.18138	0.00146575	0.0142659
TCONS_00014750	46.3315	1.74498	0.548645	3.18053	0.00147004	0.0142894
TCONS_00007708	795.201	1.41799	0.446134	3.1784	0.00148088	0.0143765
TCONS_00005620	143.059	-1.13393	0.356882	-3.17734	0.00148635	0.0144114
TCONS_00000939	1734.47	1.44674	0.455741	3.17448	0.00150104	0.0145354
TCONS_00003913	132.9	1.51363	0.476962	3.17349	0.00150616	0.014559
TCONS_00008963	142.532	1.40977	0.444264	3.17328	0.00150729	0.014559
TCONS_00006884	20.2801	1.75599	0.553767	3.17099	0.00151922	0.0146558
TCONS_00010961	17.3363	1.82382	0.575337	3.17	0.0015244	0.0146872
TCONS_00010436	13.1249	1.91481	0.60422	3.16906	0.0015293	0.014716
TCONS_00006613	45.7246	-1.19113	0.376001	-3.16789	0.0015355	0.014757
TCONS_00006208	576.254	1.50729	0.475877	3.1674	0.00153808	0.0147633
TCONS_00002066	9025.86	1.74653	0.551536	3.16667	0.00154197	0.0147821
TCONS_00010892	112.41	-1.01339	0.320149	-3.16536	0.00154892	0.0148301
TCONS_00009874	63.2791	1.46473	0.463333	3.16129	0.00157074	0.0150014
TCONS_00011707	63.2883	1.58836	0.502411	3.16147	0.00156976	0.0150014
TCONS_00003475	103.666	1.5289	0.483823	3.16004	0.0015775	0.0150472
TCONS_00002592	199.461	1.22523	0.387805	3.1594	0.00158093	0.0150612
TCONS_00005086	60.3958	-1.12621	0.356673	-3.15753	0.00159109	0.0151391
TCONS_00002419	707.947	1.47524	0.467509	3.15554	0.00160201	0.0152241
TCONS_00015336	59.9225	1.64715	0.522086	3.15494	0.00160533	0.0152367
TCONS_00000656	173.413	-0.975201	0.309258	-3.15336	0.00161403	0.0152832
TCONS_00014780	31.5852	-1.3689	0.434113	-3.15332	0.00161422	0.0152832
TCONS_00004763	320.19	-0.940195	0.298355	-3.15126	0.00162567	0.0153541
TCONS_00010054	57.9754	1.45932	0.463093	3.15124	0.00162579	0.0153541
TCONS_00014824	68.1602	1.6126	0.511791	3.15089	0.00162773	0.0153541
TCONS_00003959	15.4107	1.97617	0.627875	3.14739	0.00164736	0.0155176
TCONS_00004554	124.617	-0.986048	0.313322	-3.14707	0.00164913	0.0155176
TCONS_00004980	88.0431	1.22958	0.390789	3.14642	0.00165284	0.0155177
TCONS_00013568	91.1794	1.50308	0.477722	3.14635	0.0016532	0.0155177
TCONS_00010609	111.806	1.66762	0.530438	3.14385	0.00166742	0.0156321
TCONS_00011006	6.9718	2.22707	0.708524	3.14326	0.0016708	0.0156446
TCONS_00000668	37.8305	-1.29645	0.412547	-3.14254	0.00167486	0.0156549
TCONS_00001389	62.172	1.68146	0.535196	3.14176	0.00167936	0.0156549
TCONS_00006272	148.411	1.35178	0.43028	3.14163	0.00168009	0.0156549
TCONS_00009263	72.4047	-1.20106	0.38227	-3.1419	0.00167856	0.0156549
TCONS_00000887	127.549	1.66664	0.53092	3.13915	0.00169436	0.0156749
TCONS_00001264	123.494	1.31474	0.418799	3.13931	0.00169346	0.0156749
TCONS_00005197	141.419	-1.16755	0.371801	-3.14025	0.00168802	0.0156749
TCONS_00006170	171.388	-1.01322	0.322787	-3.13899	0.00169534	0.0156749
TCONS_00006820	127.209	-0.975999	0.310946	-3.13881	0.00169637	0.0156749
TCONS_00007419	150.351	-1.07154	0.341263	-3.13991	0.00168997	0.0156749
TCONS_00013613	24.8301	-1.53233	0.488193	-3.13877	0.00169658	0.0156749
TCONS_00004369	93.5067	1.35165	0.431063	3.13563	0.00171487	0.0157827
TCONS_00005368	1500.08	1.37623	0.438886	3.13573	0.00171427	0.0157827
TCONS_00010106	3.86203	-2.52808	0.806314	-3.13535	0.00171649	0.0157827
TCONS_00010176	26.1008	1.60917	0.513137	3.13595	0.001713	0.0157827
TCONS_00015654	5.91195	2.3108	0.737134	3.13484	0.00171947	0.0157911
TCONS_00007432	177.964	-1.08422	0.345942	-3.13412	0.00172372	0.0158111
TCONS_00002914	20.9913	1.54052	0.491591	3.13375	0.00172587	0.0158119
TCONS_00006632	104.319	1.59507	0.509105	3.13309	0.00172977	0.0158286
TCONS_00012009	23.8184	1.65252	0.527786	3.13104	0.00174189	0.0159205
TCONS_00004257	42.7975	1.20004	0.38333	3.13057	0.00174466	0.0159268
TCONS_00012457	81.4056	-1.18238	0.378098	-3.12716	0.00176501	0.0160934
TCONS_00011024	658.233	1.37459	0.4399	3.12477	0.00177943	0.0162055
TCONS_00010396	68.2793	1.31282	0.420348	3.12318	0.00178908	0.0162636
TCONS_00016544	29.1757	1.38264	0.442727	3.12302	0.00179006	0.0162636
TCONS_00010805	354.741	1.5777	0.505326	3.12215	0.00179534	0.0162922
TCONS_00014109	416.321	-0.842538	0.269975	-3.1208	0.00180362	0.0163286
TCONS_00016924	111.268	1.24717	0.399622	3.12086	0.00180322	0.0163286
TCONS_00003748	447.769	1.04244	0.334358	3.11773	0.0018225	0.0164025
TCONS_00004415	31.0824	1.6857	0.54059	3.11827	0.00181918	0.0164025
TCONS_00007784	82.8895	1.3047	0.418431	3.11808	0.00182036	0.0164025
TCONS_00010904	30.4784	1.67399	0.536921	3.11775	0.00182239	0.0164025
TCONS_00016125	10.5572	-2.15654	0.691425	-3.11898	0.0018148	0.0164025
TCONS_00001174	61.3242	1.38243	0.443683	3.11582	0.00183435	0.0164636
TCONS_00003995	84.677	-1.01629	0.326249	-3.11508	0.00183895	0.0164636
TCONS_00005703	203.948	1.41392	0.453719	3.11629	0.00183145	0.0164636
TCONS_00006965	178.697	-0.987176	0.316955	-3.11456	0.00184221	0.0164636
TCONS_00007896	7.37929	2.35755	0.756859	3.11491	0.00184003	0.0164636
TCONS_00011500	53.1376	-1.30319	0.418394	-3.11474	0.00184107	0.0164636
TCONS_00004843	27.6786	2.18039	0.70124	3.10933	0.00187512	0.0167371
TCONS_00010076	153.288	-0.911312	0.29312	-3.10901	0.00187719	0.0167371
TCONS_00014913	290.794	1.36489	0.439216	3.10755	0.00188644	0.0168
TCONS_00004663	37.5967	1.83719	0.591893	3.10393	0.00190971	0.0169875
TCONS_00009257	84.5589	-1.06931	0.344548	-3.10351	0.00191238	0.0169916
TCONS_00011694	154.5	1.41098	0.455017	3.10095	0.00192902	0.0171195
TCONS_00003503	121.311	-1.06884	0.344792	-3.09997	0.00193541	0.0171563
TCONS_00005905	353.243	0.908621	0.293149	3.09952	0.00193835	0.0171605
TCONS_00015401	59.5434	1.56725	0.505694	3.09921	0.00194038	0.0171605
TCONS_00005076	52.2309	1.64786	0.532215	3.09623	0.00196	0.0172941
TCONS_00013353	47.5892	-1.51874	0.49047	-3.09651	0.00195816	0.0172941
TCONS_00014311	88.2953	-1.08825	0.351522	-3.09581	0.00196274	0.0172984
TCONS_00001637	47.0868	1.77409	0.573401	3.09397	0.00197495	0.0173075
TCONS_00004058	10.8265	1.99321	0.644368	3.09327	0.00197962	0.0173075
TCONS_00007010	4.66012	2.45942	0.794812	3.09434	0.00197251	0.0173075
TCONS_00010150	6.91692	2.19818	0.71034	3.09454	0.00197117	0.0173075
TCONS_00014774	303.872	-0.803296	0.259673	-3.09349	0.00197816	0.0173075
TCONS_00016584	65.0409	1.63656	0.528987	3.09377	0.00197632	0.0173075
TCONS_00016799	10.4714	2.02113	0.653299	3.09374	0.00197652	0.0173075
TCONS_00016839	50.2437	-1.20891	0.391345	-3.08911	0.0020076	0.0175321
TCONS_00001889	205.913	1.27783	0.413786	3.08815	0.00201408	0.0175687
TCONS_00016998	64.8161	1.27297	0.41226	3.08777	0.00201663	0.0175709
TCONS_00010605	158.532	1.23672	0.400597	3.08718	0.00202063	0.0175857
TCONS_00007796	13.5899	1.78252	0.577527	3.08648	0.00202544	0.0176075
TCONS_00005060	79.0237	1.819	0.589577	3.08526	0.00203373	0.0176595
TCONS_00000787	14.1348	1.88994	0.61265	3.08486	0.0020365	0.0176635
TCONS_00005114	66.9826	-1.10129	0.357198	-3.08314	0.00204828	0.0177455
TCONS_00000567	24.635	1.53535	0.498159	3.08205	0.0020558	0.0177906
TCONS_00005285	309.142	1.38996	0.451232	3.08037	0.00206742	0.0178709
TCONS_00005218	247.158	0.987179	0.320927	3.07603	0.00209779	0.0180926
TCONS_00009838	222.858	1.67872	0.545734	3.07608	0.00209741	0.0180926
TCONS_00000019	76.0784	1.28792	0.418783	3.07538	0.00210233	0.0180944
TCONS_00001750	105.079	-0.989903	0.321886	-3.07533	0.00210273	0.0180944
TCONS_00014746	560.759	-1.07107	0.34845	-3.07381	0.00211346	0.0181663
TCONS_00004389	11.9514	1.84213	0.599662	3.07195	0.00212667	0.0182593
TCONS_00014748	41.1606	-1.53844	0.501047	-3.07044	0.0021374	0.0183308
TCONS_00004183	26.6788	1.50593	0.491031	3.06687	0.00216311	0.0185306
TCONS_00004365	64.8921	1.34181	0.437651	3.06595	0.00216983	0.0185673
TCONS_00003197	857.63	1.28559	0.419522	3.06442	0.00218094	0.0186208
TCONS_00003599	49.1512	1.37492	0.448646	3.06461	0.00217957	0.0186208
TCONS_00013732	63.8447	-1.08188	0.353187	-3.0632	0.00218984	0.0186759
TCONS_00011814	80.5915	1.28895	0.420833	3.06285	0.0021924	0.0186769
TCONS_00009252	116.381	1.49598	0.488777	3.06065	0.00220857	0.0187542
TCONS_00011890	41.0434	1.45469	0.475312	3.0605	0.00220969	0.0187542
TCONS_00012565	21.9824	1.59338	0.520666	3.06028	0.00221128	0.0187542
TCONS_00013888	19.0342	1.90879	0.623535	3.06124	0.00220422	0.0187542
TCONS_00003433	122.509	1.41613	0.462958	3.05886	0.00222178	0.0188189
TCONS_00010036	19.0961	1.81584	0.593687	3.05859	0.00222383	0.0188189
TCONS_00012586	157.326	1.07684	0.352191	3.05754	0.00223163	0.0188641
TCONS_00003821	329.331	-0.982193	0.321298	-3.05696	0.00223595	0.0188687
TCONS_00015676	34.788	1.68253	0.550422	3.0568	0.00223711	0.0188687
TCONS_00013933	8.44053	2.16123	0.707207	3.056	0.0022431	0.0188984
TCONS_00007942	877.22	-0.841548	0.275417	-3.05555	0.00224652	0.0189063
TCONS_00000524	81.535	1.33923	0.438676	3.05288	0.00226654	0.0190121
TCONS_00002540	93.4654	1.41781	0.464353	3.0533	0.00226338	0.0190121
TCONS_00010158	53.0754	1.30027	0.425875	3.05318	0.00226432	0.0190121
TCONS_00007200	20.5028	1.81338	0.59415	3.05205	0.00227283	0.0190439
TCONS_00010916	35.9517	1.30382	0.427327	3.0511	0.00228007	0.0190838
TCONS_00009860	39.1909	1.59025	0.521318	3.05044	0.00228507	0.0191047
TCONS_00010626	344.25	-0.816308	0.267891	-3.04717	0.00231011	0.0192929
TCONS_00001242	319.172	1.41426	0.464278	3.04615	0.00231794	0.0193161
TCONS_00010237	31.4239	1.40659	0.461733	3.04632	0.00231659	0.0193161
TCONS_00011079	37.8105	1.43967	0.472967	3.04391	0.00233524	0.0194392
TCONS_00004828	148.458	1.24879	0.410405	3.04283	0.00234367	0.0194718
TCONS_00005581	24.0734	1.74212	0.572547	3.04275	0.00234425	0.0194718
TCONS_00000606	29.6544	-1.37328	0.451504	-3.04156	0.00235359	0.0195282
TCONS_00007958	185.541	-0.913809	0.300494	-3.04103	0.00235772	0.0195413
TCONS_00005196	87.206	-1.12851	0.37115	-3.04058	0.00236127	0.0195495
TCONS_00016316	230.422	1.04075	0.342663	3.03723	0.00238759	0.019746
TCONS_00013550	96.1292	1.63502	0.538499	3.03624	0.00239546	0.0197897
TCONS_00000450	3889.5	0.990512	0.326612	3.03268	0.0024239	0.0200031
TCONS_00002426	251.217	1.31844	0.434798	3.03229	0.00242705	0.0200075
TCONS_00004411	55.5253	1.36612	0.450651	3.03144	0.00243388	0.0200422
TCONS_00004664	265.712	1.55575	0.513478	3.02984	0.00244684	0.0201239
TCONS_00008115	480.528	-0.892809	0.294699	-3.02957	0.00244906	0.0201239
TCONS_00003839	34.0833	1.9437	0.6419	3.02804	0.00246144	0.0202039
TCONS_00006180	224.841	1.29287	0.42709	3.02715	0.00246871	0.0202418
TCONS_00007065	63.6913	-1.06398	0.351518	-3.02681	0.00247147	0.0202428
TCONS_00001272	20.6523	1.44825	0.478671	3.02557	0.00248164	0.0203044
TCONS_00006365	65.394	-1.15411	0.381502	-3.02517	0.00248492	0.0203094
TCONS_00009421	131.593	1.58362	0.523628	3.02431	0.00249198	0.0203454
TCONS_00007573	27.4997	1.76305	0.583113	3.0235	0.00249866	0.0203782
TCONS_00011521	532.799	1.05636	0.349495	3.02253	0.0025067	0.020422
TCONS_00005917	117.423	1.46861	0.486907	3.0162	0.00255964	0.0208311
TCONS_00000953	210.086	-0.861277	0.285927	-3.01223	0.00259338	0.0210833
TCONS_00002808	276.388	1.74655	0.580045	3.01106	0.00260339	0.0211197
TCONS_00010049	97.978	-0.986184	0.327501	-3.01124	0.00260182	0.0211197
TCONS_00011441	1325.16	1.24908	0.415008	3.00978	0.0026144	0.0211642
TCONS_00012720	329.643	-0.893363	0.296814	-3.00984	0.00261383	0.0211642
TCONS_00012535	28.7299	1.31581	0.437568	3.00709	0.00263762	0.0213296
TCONS_00010313	96.5661	1.36127	0.453504	3.00168	0.00268492	0.0216772
TCONS_00016894	5.10427	-2.34836	0.782387	-3.00153	0.00268628	0.0216772
TCONS_00008968	13.8157	-1.94867	0.649379	-3.00083	0.00269245	0.0216813
TCONS_00010324	196.973	1.28901	0.429511	3.00111	0.00269	0.0216813
TCONS_00000157	54.7447	1.10844	0.369501	2.99983	0.00270128	0.0217296
TCONS_00011528	83.6974	1.76326	0.588495	2.99622	0.00273347	0.0219654
TCONS_00011889	17.2937	1.83976	0.614371	2.99454	0.00274858	0.0220436
TCONS_00014265	45.2661	-1.15331	0.385144	-2.9945	0.00274897	0.0220436
TCONS_00001040	11.0737	2.16164	0.722092	2.99357	0.0027573	0.0220873
TCONS_00000084	947.781	1.21532	0.406128	2.99246	0.00276738	0.0221448
TCONS_00008407	28.2522	1.97684	0.660719	2.99196	0.00277197	0.0221584
TCONS_00001911	176.7	1.49871	0.501294	2.98969	0.00279261	0.0222155
TCONS_00003626	265.684	1.42652	0.477213	2.98928	0.00279631	0.0222155
TCONS_00004541	312.878	-0.876444	0.293197	-2.98926	0.00279653	0.0222155
TCONS_00012165	188.045	1.20087	0.401646	2.98987	0.00279095	0.0222155
TCONS_00013205	244.767	-1.17328	0.392444	-2.98967	0.00279283	0.0222155
TCONS_00014607	5.55843	2.21924	0.742155	2.99027	0.00278735	0.0222155
TCONS_00009967	238.349	-0.90827	0.303911	-2.98861	0.00280249	0.0222397
TCONS_00005223	168.506	-1.02819	0.344128	-2.98781	0.0028098	0.0222746
TCONS_00000218	281.832	1.33045	0.445814	2.98432	0.00284209	0.022484
TCONS_00007763	36.3142	-1.26067	0.42241	-2.98447	0.00284073	0.022484
TCONS_00007125	27.9744	1.58375	0.531031	2.9824	0.00285998	0.0226021
TCONS_00000435	11.2402	1.89048	0.634141	2.98116	0.00287158	0.022647
TCONS_00007611	72.877	-1.07567	0.360809	-2.98128	0.00287045	0.022647
TCONS_00000762	64.2563	1.23841	0.415514	2.98044	0.00287835	0.022677
TCONS_00015242	4.92504	-2.32711	0.780881	-2.98011	0.00288147	0.0226782
TCONS_00005269	47.5493	1.35011	0.453365	2.97799	0.00290146	0.0228121
TCONS_00006409	150.355	-0.881701	0.296147	-2.97724	0.00290857	0.0228445
TCONS_00007932	4.62345	2.32305	0.78044	2.97659	0.00291475	0.0228696
TCONS_00003356	60.4433	1.28274	0.431216	2.97471	0.0029327	0.0229868
TCONS_00007104	101.706	1.37913	0.463766	2.97377	0.00294162	0.023013
TCONS_00013317	78.8893	-1.14962	0.386592	-2.97373	0.00294205	0.023013
TCONS_00009115	785.034	-0.84706	0.284879	-2.9734	0.00294521	0.0230141
TCONS_00011197	45.2544	1.41222	0.475127	2.97229	0.00295583	0.0230736
TCONS_00004244	200.942	1.58033	0.532386	2.9684	0.00299353	0.023344
TCONS_00014571	16.047	-1.78967	0.603097	-2.96746	0.00300269	0.0233916
TCONS_00016518	3839.43	-0.836163	0.281844	-2.96676	0.0030096	0.0234216
TCONS_00003154	185.518	-0.923031	0.311547	-2.96273	0.00304923	0.0237059
TCONS_00004785	7.54993	2.12983	0.719105	2.96178	0.0030587	0.0237402
TCONS_00013428	317.049	-0.814444	0.274996	-2.96166	0.00305985	0.0237402
TCONS_00006880	18.6032	1.51255	0.511235	2.95862	0.00309019	0.0239513
TCONS_00000107	60.9582	-1.21512	0.410848	-2.95759	0.00310055	0.0239878
TCONS_00002071	70.7564	1.70439	0.576288	2.95753	0.00310117	0.0239878
TCONS_00008120	4809.87	1.61446	0.546029	2.95673	0.00310919	0.0240013
TCONS_00014205	148.037	-0.942692	0.318805	-2.95695	0.00310696	0.0240013
TCONS_00003687	64.6296	1.47876	0.500396	2.95517	0.00312493	0.0240951
TCONS_00011931	7.17316	-2.09935	0.710462	-2.95491	0.00312764	0.0240951
TCONS_00006484	8.01456	2.03088	0.687433	2.95429	0.00313392	0.0241192
TCONS_00013461	26.9726	1.34595	0.455933	2.95209	0.0031563	0.0242671
TCONS_00014440	1552.07	-0.858359	0.290907	-2.95063	0.00317126	0.0243576
TCONS_00007984	1261.25	1.35403	0.459174	2.94884	0.00318965	0.024432
TCONS_00012381	26.0867	1.48697	0.504168	2.94936	0.00318432	0.024432
TCONS_00014350	460.443	-1.41827	0.480973	-2.94876	0.00319054	0.024432
TCONS_00006505	49.7794	1.79001	0.607782	2.94515	0.00322793	0.0246696
TCONS_00016514	40.8449	-1.30013	0.441448	-2.94515	0.00322801	0.0246696
TCONS_00008233	195.603	-0.913546	0.31026	-2.94445	0.00323532	0.0247008
TCONS_00016437	14.0622	-1.93905	0.65916	-2.94169	0.00326422	0.0248966
TCONS_00010495	117.772	-1.0412	0.354125	-2.9402	0.00328003	0.0249923
TCONS_00004588	2494.23	1.24381	0.423089	2.93984	0.00328384	0.0249964
TCONS_00005862	11.5601	1.95281	0.664355	2.93941	0.00328837	0.025006
TCONS_00004822	233.105	-0.953719	0.324538	-2.9387	0.00329594	0.0250387
TCONS_00015831	54.6922	-1.21511	0.413537	-2.93833	0.00329986	0.0250436
TCONS_00005999	106.298	1.45507	0.495433	2.93697	0.00331434	0.0251285
TCONS_00005049	213.39	-1.02276	0.348343	-2.93607	0.00332396	0.0251765
TCONS_00012338	5.85229	2.12886	0.725483	2.9344	0.00334197	0.0252879
TCONS_00001548	16.5058	1.60765	0.548073	2.93327	0.00335409	0.0253296
TCONS_00005497	14.8003	1.77684	0.605752	2.93327	0.0033541	0.0253296
TCONS_00003437	54.3408	1.5108	0.515312	2.93182	0.00336985	0.0253984
TCONS_00015598	68.4899	1.21836	0.415539	2.93201	0.00336777	0.0253984
TCONS_00016682	27.801	1.66519	0.568035	2.93149	0.00337339	0.0254001
TCONS_00013766	68.592	1.53985	0.525475	2.93039	0.0033854	0.0254654
TCONS_00011695	37.0239	1.27097	0.435058	2.92138	0.00348484	0.0261669
TCONS_00015832	27.9763	1.49227	0.510819	2.92132	0.0034855	0.0261669
TCONS_00003632	893.641	-0.779659	0.266978	-2.92031	0.00349685	0.0261926
TCONS_00004639	45.0079	1.43135	0.490172	2.9201	0.0034992	0.0261926
TCONS_00010069	127.037	1.25406	0.429385	2.92059	0.00349366	0.0261926
TCONS_00013279	55.0895	-1.07005	0.366681	-2.91821	0.00352043	0.0263258
TCONS_00007897	82.4159	1.41561	0.485531	2.9156	0.00355003	0.0265212
TCONS_00003007	146.224	-0.912708	0.313268	-2.91351	0.00357391	0.0266736
TCONS_00009363	20.4677	1.6069	0.551638	2.91296	0.00358018	0.0266943
TCONS_00003758	17.8104	1.66002	0.570169	2.91146	0.00359748	0.0267711
TCONS_00010451	11.7138	1.9711	0.676999	2.91152	0.00359675	0.0267711
TCONS_00005983	115.862	-0.893399	0.307086	-2.90928	0.00362258	0.0269109
TCONS_00012308	37.772	1.41355	0.485888	2.90922	0.00362329	0.0269109
TCONS_00015496	23.2451	1.64939	0.567191	2.908	0.00363751	0.0269902
TCONS_00006022	8.87021	1.93941	0.667005	2.90764	0.00364168	0.026995
TCONS_00011559	57.5214	1.34281	0.461876	2.9073	0.00364558	0.0269978
TCONS_00009314	71.6447	1.23525	0.425028	2.90627	0.00365761	0.0270345
TCONS_00013254	70.4294	-1.01526	0.349306	-2.90649	0.00365505	0.0270345
TCONS_00003963	108.102	1.57736	0.543105	2.90434	0.00368024	0.0271658
TCONS_00014230	227.633	1.04496	0.359817	2.90415	0.00368248	0.0271658
TCONS_00012663	54.96	1.1524	0.397208	2.90126	0.00371668	0.0273917
TCONS_00003974	26.4903	1.43932	0.496484	2.89903	0.00374319	0.0275162
TCONS_00009728	318.605	1.42411	0.491175	2.8994	0.00373878	0.0275162
TCONS_00012908	104.41	1.30525	0.450253	2.89893	0.00374437	0.0275162
TCONS_00002323	18.1409	1.64601	0.568003	2.89788	0.00375691	0.027575
TCONS_00014863	91.166	1.21215	0.41832	2.89766	0.00375957	0.027575
TCONS_00013000	130.381	-1.0215	0.35264	-2.89673	0.00377069	0.02763
TCONS_00014541	34.4068	1.75145	0.605001	2.89495	0.00379221	0.0277611
TCONS_00008674	23.5277	1.46571	0.50661	2.89317	0.00381377	0.0278923
TCONS_00008490	26.2487	1.60508	0.555011	2.89198	0.00382826	0.0279715
TCONS_00015528	176.228	-1.0838	0.374812	-2.89157	0.00383318	0.0279808
TCONS_00010758	339.69	-0.842879	0.291526	-2.89127	0.00383692	0.0279814
TCONS_00007643	17.8186	2.18173	0.754903	2.89008	0.00385142	0.0280603
TCONS_00003237	34.8272	1.38404	0.47895	2.88973	0.00385567	0.0280646
TCONS_00016601	21.5065	1.67198	0.578745	2.88897	0.00386503	0.028106
TCONS_00011000	67.0267	1.5093	0.522569	2.88824	0.0038741	0.0281452
TCONS_00014438	284.946	-0.786124	0.272321	-2.88675	0.00389239	0.0282512
TCONS_00009879	195.168	-0.91334	0.31657	-2.88511	0.00391272	0.0283719
TCONS_00007071	187.571	-0.877272	0.304107	-2.88474	0.00391732	0.0283783
TCONS_00004448	53.7136	-1.197	0.415338	-2.88198	0.00395184	0.0285203
TCONS_00007900	144.179	1.4193	0.492415	2.88233	0.00394751	0.0285203
TCONS_00008575	116.078	-0.920377	0.319322	-2.88228	0.00394809	0.0285203
TCONS_00009300	6.1215	2.19935	0.763134	2.88199	0.0039517	0.0285203
TCONS_00004696	106.564	0.927467	0.322028	2.88008	0.0039757	0.0286655
TCONS_00003352	115.421	-0.918473	0.319123	-2.87811	0.0040006	0.0287881
TCONS_00009481	23.2869	-1.38274	0.480446	-2.87803	0.00400162	0.0287881
TCONS_00014490	172.585	1.03203	0.358613	2.87785	0.00400399	0.0287881
TCONS_00007282	256.45	0.806805	0.28047	2.87662	0.00401962	0.0288733
TCONS_00011785	11.6123	1.84563	0.642926	2.87068	0.00409588	0.0293935
TCONS_00001563	590.187	1.06643	0.37164	2.86953	0.0041108	0.029473
TCONS_00013995	1106.64	-0.972912	0.339191	-2.86833	0.00412646	0.0295575
TCONS_00008557	25.0732	-1.52769	0.533144	-2.86543	0.00416439	0.0298013
TCONS_00010922	35439.4	1.58198	0.552225	2.86473	0.00417365	0.0298396
TCONS_00009890	99.4457	0.965172	0.336954	2.86441	0.00417793	0.0298424
TCONS_00014020	292.57	-0.842617	0.294235	-2.86376	0.00418645	0.0298753
TCONS_00003257	779.061	1.23664	0.432176	2.86143	0.00421732	0.0300676
TCONS_00005156	13.768	1.92194	0.671908	2.86042	0.00423086	0.030136
TCONS_00001075	87.7893	1.11194	0.388945	2.85886	0.00425165	0.0302559
TCONS_00011925	18.403	1.67716	0.586986	2.85725	0.00427335	0.0303257
TCONS_00014991	24.0368	1.7118	0.599079	2.85739	0.00427139	0.0303257
TCONS_00016110	66.4154	-1.22026	0.42701	-2.85768	0.00426745	0.0303257
TCONS_00002381	60.7833	1.48828	0.521035	2.8564	0.00428477	0.0303786
TCONS_00005963	16.1612	1.67133	0.585368	2.85518	0.00430128	0.0304674
TCONS_00000112	4.6573	2.17614	0.762348	2.85452	0.00431015	0.0304749
TCONS_00010638	59.0264	1.66887	0.584643	2.85451	0.00431031	0.0304749
TCONS_00015822	402.04	-0.718721	0.251915	-2.85304	0.00433038	0.0305886
TCONS_00009810	193.57	0.850966	0.298461	2.85118	0.00435567	0.0307388
TCONS_00005087	160.454	1.6576	0.581775	2.84922	0.00438264	0.0308722
TCONS_00015339	33.534	1.24607	0.437294	2.8495	0.00437879	0.0308722
TCONS_00007972	76.7172	-0.999717	0.351071	-2.84762	0.00440471	0.0309948
TCONS_00009804	71.7076	-0.951131	0.334068	-2.84712	0.00441172	0.0309948
TCONS_00016942	19.4208	1.51754	0.533016	2.84708	0.00441221	0.0309948
TCONS_00000944	11.1457	1.9615	0.68906	2.84663	0.00441845	0.0310102
TCONS_00003245	40.6278	1.26631	0.445159	2.84463	0.00444634	0.0311223
TCONS_00012952	4.39976	-2.22412	0.781874	-2.84461	0.00444663	0.0311223
TCONS_00015571	21.074	-1.50966	0.530652	-2.84492	0.00444229	0.0311223
TCONS_00009482	34.6767	1.19559	0.420515	2.84315	0.00446695	0.0312075
TCONS_00012169	87.8936	1.07317	0.377426	2.84338	0.00446385	0.0312075
TCONS_00007214	141.172	1.69808	0.597406	2.84242	0.00447729	0.0312512
TCONS_00007238	756.401	1.27761	0.449534	2.84208	0.00448196	0.0312552
TCONS_00013593	24.9432	1.63248	0.574602	2.84106	0.00449644	0.0313276
TCONS_00006629	119.659	1.22723	0.432173	2.83967	0.00451605	0.0314071
TCONS_00013138	504.269	-0.750337	0.264224	-2.83977	0.00451457	0.0314071
TCONS_00002490	84.916	-0.968488	0.341206	-2.83842	0.00453373	0.0315014
TCONS_00006397	226.728	-0.904735	0.318847	-2.83752	0.00454649	0.0315614
TCONS_00016652	117.991	-0.953766	0.336172	-2.83714	0.00455199	0.0315709
TCONS_00014284	42.4882	1.30209	0.459066	2.83639	0.00456272	0.0316167
TCONS_00007554	80.6728	-1.00397	0.354169	-2.83473	0.00458641	0.031752
TCONS_00001632	94.8033	1.11068	0.391891	2.83415	0.00459477	0.0317812
TCONS_00002972	127	-0.841633	0.297002	-2.83377	0.00460028	0.0317905
TCONS_00004879	35.8754	1.37407	0.485071	2.83271	0.00461554	0.0318672
TCONS_00009668	109.441	-0.878735	0.310242	-2.83241	0.00461979	0.0318678
TCONS_00004909	73.9263	-1.14727	0.405216	-2.83124	0.00463673	0.031927
TCONS_00009198	108.145	-1.03823	0.36669	-2.83137	0.00463496	0.031927
TCONS_00000516	7421.82	1.2191	0.430885	2.82928	0.00466526	0.0320946
TCONS_00006218	29.9022	1.18539	0.419358	2.82668	0.0047033	0.0323273
TCONS_00014972	69.1066	1.38839	0.491412	2.82531	0.00472349	0.0324369
TCONS_00005042	53.2557	1.17549	0.416105	2.825	0.0047281	0.0324394
TCONS_00001407	17.8269	1.57525	0.557979	2.82314	0.00475553	0.0325692
TCONS_00009727	157.227	1.258	0.44556	2.82341	0.00475162	0.0325692
TCONS_00006369	39.1089	1.18817	0.421143	2.82131	0.00478287	0.0327271
TCONS_00009055	186.267	-0.913877	0.323968	-2.82089	0.00478907	0.0327403
TCONS_00003668	85.0437	1.20435	0.427087	2.81992	0.00480361	0.0327772
TCONS_00009072	2587.18	1.37273	0.486842	2.81967	0.00480733	0.0327772
TCONS_00009480	11.1755	-1.84205	0.653204	-2.82003	0.00480194	0.0327772
TCONS_00006871	204.36	1.28554	0.456244	2.81766	0.00483747	0.032924
TCONS_00012839	15.9043	1.66227	0.589921	2.81778	0.00483562	0.032924
TCONS_00001903	43.2525	1.24055	0.440581	2.81572	0.00486677	0.0330646
TCONS_00011326	221.619	-1.30241	0.462527	-2.81587	0.00486458	0.0330646
TCONS_00001078	131.477	0.964631	0.342655	2.81517	0.00487518	0.0330924
TCONS_00006019	262.469	-0.85279	0.303161	-2.813	0.00490819	0.0332574
TCONS_00015755	6986.03	1.26931	0.451191	2.81324	0.00490456	0.0332574
TCONS_00002091	237.274	-0.928116	0.33005	-2.81205	0.00492273	0.0333265
TCONS_00005203	515.736	1.06294	0.378055	2.81159	0.00492969	0.033344
TCONS_00002233	80.826	0.994243	0.353751	2.81057	0.00494538	0.0334206
TCONS_00000463	19.9286	1.55585	0.553875	2.80902	0.00496921	0.0335227
TCONS_00008914	9.10615	1.93596	0.689194	2.80902	0.00496925	0.0335227
TCONS_00007400	15.7705	1.87557	0.66789	2.80821	0.0049818	0.0335778
TCONS_00003906	66.9729	1.17559	0.419204	2.80435	0.00504177	0.0339521
TCONS_00007168	85.254	1.15502	0.411958	2.80372	0.00505164	0.0339886
TCONS_00006381	30.0475	1.39238	0.496897	2.80215	0.00507634	0.0340415
TCONS_00009409	47.086	1.31593	0.469624	2.80209	0.00507731	0.0340415
TCONS_00013104	513.844	1.15289	0.411326	2.80285	0.00506526	0.0340415
TCONS_00015351	71.6777	1.38823	0.495372	2.80241	0.00507227	0.0340415
TCONS_00002418	63.9531	-1.05779	0.377828	-2.79965	0.0051158	0.0342578
TCONS_00007249	6.24491	2.20608	0.788032	2.79948	0.00511852	0.0342578
TCONS_00004731	623.848	1.11563	0.39866	2.79846	0.00513466	0.0343358
TCONS_00000861	285.016	1.26768	0.453107	2.79776	0.0051459	0.0343809
TCONS_00006434	237.537	-0.820002	0.293318	-2.79561	0.00518026	0.0345803
TCONS_00003354	7.51706	1.86664	0.668167	2.79368	0.00521125	0.0347568
TCONS_00001003	160.091	1.04928	0.375786	2.79224	0.00523446	0.0348508
TCONS_00001036	149.481	1.10029	0.394042	2.79232	0.00523323	0.0348508
TCONS_00000674	37.1	1.67027	0.598253	2.79192	0.00523965	0.0348551
TCONS_00015150	403.029	-1.08685	0.389386	-2.7912	0.00525135	0.0349025
TCONS_00000662	686.201	-0.742186	0.266126	-2.78885	0.00528951	0.0350648
TCONS_00003840	27.822	1.78613	0.640333	2.78937	0.00528101	0.0350648
TCONS_00007740	77.8911	1.78257	0.639133	2.78903	0.00528654	0.0350648
TCONS_00002724	53.0379	1.23109	0.441576	2.78795	0.00530434	0.0351326
TCONS_00003686	19.1923	1.59502	0.572239	2.78733	0.0053145	0.0351695
TCONS_00005431	379.474	-0.830265	0.297959	-2.7865	0.005328	0.0351979
TCONS_00006109	141.531	-0.981454	0.352209	-2.78656	0.00532701	0.0351979
TCONS_00013574	13.0232	-1.65008	0.592607	-2.78444	0.00536204	0.0353922
TCONS_00007630	198.431	-0.882313	0.316976	-2.78353	0.00537711	0.0354001
TCONS_00012393	85.311	1.33277	0.478798	2.78359	0.00537617	0.0354001
TCONS_00014638	3.81513	2.24806	0.807576	2.78372	0.00537397	0.0354001
TCONS_00014200	5.74486	-2.11292	0.759354	-2.78253	0.00539376	0.03547
TCONS_00014517	280.949	-0.810886	0.291441	-2.78233	0.005397	0.03547
TCONS_00006204	25.2191	1.75846	0.632118	2.78185	0.00540502	0.0354922
TCONS_00000958	97.8994	-0.890383	0.320111	-2.78148	0.00541116	0.035502
TCONS_00004152	51.4369	1.42175	0.511294	2.78069	0.00542436	0.0355581
TCONS_00001897	103.703	-0.932895	0.335652	-2.77935	0.0054468	0.0356613
TCONS_00012893	199.837	0.844651	0.30392	2.77919	0.00544942	0.0356613
TCONS_00011190	21.2664	1.55833	0.561001	2.77777	0.00547333	0.0357872
TCONS_00007144	17.6356	1.75602	0.632492	2.77636	0.00549716	0.0359123
TCONS_00000711	944.071	1.0054	0.362431	2.77404	0.00553643	0.0361071
TCONS_00009692	106.738	-0.95865	0.345571	-2.77411	0.00553536	0.0361071
TCONS_00004190	95.1801	1.18532	0.427406	2.77329	0.00554919	0.0361595
TCONS_00001601	151.817	-0.915472	0.330158	-2.77283	0.0055572	0.0361809
TCONS_00003556	324.143	1.10355	0.398254	2.77097	0.00558904	0.0362183
TCONS_00007140	16.2816	1.86459	0.672893	2.771	0.00558844	0.0362183
TCONS_00008857	435.703	-0.793851	0.28636	-2.77221	0.00556774	0.0362183
TCONS_00009537	81.8258	1.25755	0.453854	2.77083	0.00559134	0.0362183
TCONS_00009573	13.622	1.70298	0.61461	2.77083	0.00559135	0.0362183
TCONS_00014611	140.46	1.46634	0.529042	2.77169	0.00557653	0.0362183
TCONS_00000345	560.324	1.51322	0.546398	2.76944	0.00561521	0.0363421
TCONS_00000297	6.67072	1.94841	0.703865	2.76816	0.00563737	0.036402
TCONS_00002119	81.3064	-0.985707	0.356098	-2.76808	0.00563874	0.036402
TCONS_00015639	5.13742	-2.12208	0.76655	-2.76835	0.00563402	0.036402
TCONS_00000736	120.638	1.44617	0.522861	2.76588	0.00567702	0.0364669
TCONS_00007079	135.318	1.13416	0.410097	2.76558	0.00568217	0.0364669
TCONS_00007486	32.7549	1.13913	0.41165	2.76722	0.00565368	0.0364669
TCONS_00008538	31.2663	1.24545	0.450206	2.7664	0.00566792	0.0364669
TCONS_00012934	62.6846	1.38928	0.502311	2.76577	0.0056789	0.0364669
TCONS_00015198	140.478	1.23097	0.445064	2.76583	0.00567784	0.0364669
TCONS_00015955	1310.54	-0.793158	0.28677	-2.76583	0.00567774	0.0364669
TCONS_00002019	17.1154	1.75657	0.635562	2.76381	0.00571311	0.0365484
TCONS_00007804	30.7716	1.67454	0.605781	2.76426	0.00570525	0.0365484
TCONS_00009371	154.712	-0.99329	0.359398	-2.76376	0.00571397	0.0365484
TCONS_00009781	221.564	-0.878728	0.317862	-2.7645	0.00570109	0.0365484
TCONS_00008215	6.66908	2.15379	0.779827	2.76188	0.00574692	0.0367284
TCONS_00003903	130.156	1.28985	0.4671	2.76141	0.00575531	0.0367514
TCONS_00010408	6.44256	2.22988	0.807824	2.76036	0.00577375	0.0368383
TCONS_00016086	22.7711	1.4236	0.51584	2.75977	0.00578415	0.036874
TCONS_00003536	55.5349	1.08684	0.393869	2.75939	0.005791	0.0368869
TCONS_00009930	133.623	1.07896	0.391341	2.75708	0.00583194	0.0370859
TCONS_00016314	98.7263	-0.973134	0.352931	-2.7573	0.00582817	0.0370859
TCONS_00005050	71.5153	-0.972541	0.352809	-2.75657	0.0058412	0.0371139
TCONS_00001423	59.1222	1.42505	0.517218	2.75522	0.00586532	0.0372362
TCONS_00011425	21.3316	-1.53037	0.555734	-2.75378	0.00589106	0.0373377
TCONS_00015047	164.64	-0.855385	0.310595	-2.75402	0.00588677	0.0373377
TCONS_00014613	107.769	-1.07073	0.389024	-2.75235	0.00591693	0.0374707
TCONS_00010781	19.9788	-1.43713	0.522215	-2.75199	0.00592349	0.0374811
TCONS_00001551	257.278	-0.835086	0.303603	-2.75059	0.00594884	0.0375836
TCONS_00013583	9.84822	1.9517	0.709569	2.75055	0.00594951	0.0375836
TCONS_00001326	7.82619	1.97865	0.71961	2.74961	0.00596657	0.0376603
TCONS_00015969	90.1533	1.16081	0.42256	2.74708	0.00601283	0.037921
TCONS_00005568	79.1543	1.03306	0.37618	2.74619	0.00602925	0.0379932
TCONS_00016051	26.9848	1.28152	0.467065	2.74377	0.00607374	0.0382421
TCONS_00016154	62.5388	1.04919	0.382465	2.74323	0.00608371	0.0382734
TCONS_00007690	30.3041	1.35395	0.493968	2.74096	0.00612603	0.0384732
TCONS_00010929	15.5154	1.7942	0.654647	2.74071	0.00613057	0.0384732
TCONS_00015343	40.9507	-1.14811	0.41889	-2.74083	0.00612834	0.0384732
TCONS_00002239	132.487	1.50941	0.55084	2.7402	0.00614014	0.0385017
TCONS_00011508	234.962	1.10479	0.40332	2.73924	0.00615806	0.0385319
TCONS_00012194	163.759	-0.842674	0.307642	-2.73914	0.00616007	0.0385319
TCONS_00012492	8.73913	1.80557	0.659163	2.73919	0.00615909	0.0385319
TCONS_00001100	56.8883	1.25057	0.456757	2.73794	0.00618257	0.0386411
TCONS_00002660	81.7152	-0.93436	0.341414	-2.73673	0.00620525	0.0387511
TCONS_00007736	52.0951	1.32828	0.485641	2.73511	0.00623592	0.0389109
TCONS_00003158	30.9748	1.41152	0.516269	2.73407	0.00625565	0.0390022
TCONS_00001468	14.7318	1.83126	0.670416	2.73153	0.00630411	0.0392649
TCONS_00004269	7.81968	2.03	0.743228	2.73132	0.00630805	0.0392649
TCONS_00005019	382.871	-0.894488	0.327697	-2.72962	0.00634075	0.0394364
TCONS_00012394	24.3316	1.52715	0.559714	2.72845	0.00636334	0.0395447
TCONS_00012311	222.983	1.60395	0.588136	2.72717	0.006388	0.0396657
TCONS_00008222	13.2203	1.67319	0.614594	2.72243	0.00648038	0.0401742
TCONS_00016897	976.382	-0.902755	0.331568	-2.72269	0.00647533	0.0401742
TCONS_00003195	38.6233	1.18123	0.434118	2.72098	0.00650878	0.0403176
TCONS_00009102	18.1872	1.35532	0.498205	2.7204	0.00652022	0.0403231
TCONS_00013754	42.2668	1.46057	0.536878	2.72048	0.00651865	0.0403231
TCONS_00004049	99.6004	-1.03896	0.382072	-2.71927	0.00654269	0.0404294
TCONS_00001758	390.786	-0.775835	0.285375	-2.71865	0.00655492	0.0404396
TCONS_00013415	141.126	-0.972745	0.357803	-2.71866	0.0065547	0.0404396
TCONS_00005170	477.641	-0.7708	0.28361	-2.71782	0.00657144	0.0405089
TCONS_00006099	74.9673	-0.917479	0.337695	-2.71688	0.00658999	0.0405735
TCONS_00007141	17.1044	1.59881	0.588788	2.71543	0.00661905	0.0405735
TCONS_00009831	9.52318	1.88288	0.69322	2.71613	0.00660491	0.0405735
TCONS_00011894	26.7431	1.41651	0.521506	2.71619	0.00660383	0.0405735
TCONS_00013406	316.055	1.20207	0.442673	2.71548	0.00661791	0.0405735
TCONS_00013831	138.979	1.06406	0.391697	2.71655	0.00659663	0.0405735
TCONS_00015721	86.6254	-1.25886	0.46356	-2.71564	0.00661487	0.0405735
TCONS_00008901	274.007	1.27307	0.469154	2.71354	0.00665694	0.0407731
TCONS_00007860	226.362	-0.864866	0.318877	-2.71223	0.00668328	0.0409017
TCONS_00001749	95.6538	-0.927809	0.342142	-2.71177	0.00669251	0.0409254
TCONS_00008540	16.3671	1.5095	0.557196	2.7091	0.00674657	0.0412051
TCONS_00010509	42.2033	1.37024	0.505815	2.70898	0.00674901	0.0412051
TCONS_00005537	25.2854	1.41667	0.523113	2.70815	0.00676604	0.0412761
TCONS_00016136	99.1212	-1.06443	0.393132	-2.70755	0.00677809	0.0413167
TCONS_00001090	216.15	1.00819	0.372829	2.70415	0.00684788	0.0416756
TCONS_00005447	7.81856	-1.84598	0.682639	-2.70418	0.00684722	0.0416756
TCONS_00008076	101.148	1.21986	0.451162	2.70382	0.00685482	0.0416847
TCONS_00011300	214.772	1.60943	0.595681	2.70184	0.00689573	0.0419002
TCONS_00007404	109.015	-0.888235	0.328879	-2.7008	0.00691739	0.0419984
TCONS_00007167	7.75736	1.89133	0.700499	2.69998	0.00693439	0.0420683
TCONS_00006442	76.1254	1.04257	0.386271	2.69906	0.00695357	0.0421178
TCONS_00016560	8.46508	1.78177	0.660139	2.69908	0.00695313	0.0421178
TCONS_00008496	9.86797	1.82563	0.676602	2.69823	0.00697098	0.0421899
TCONS_00008518	2225.94	-0.819388	0.303822	-2.69693	0.00699816	0.0422874
TCONS_00012672	281.471	-0.934774	0.346579	-2.69714	0.00699372	0.0422874
TCONS_00006391	197.07	-0.796283	0.295465	-2.69502	0.00703854	0.0424979
TCONS_00015713	130.47	1.09972	0.408207	2.69403	0.00705945	0.0425906
TCONS_00003256	95.8761	1.28168	0.475816	2.69365	0.00706747	0.0426053
TCONS_00007341	120.062	0.954665	0.354649	2.69186	0.00710547	0.0427579
TCONS_00010806	174.683	1.25916	0.467765	2.69185	0.00710561	0.0427579
TCONS_00012929	55.1876	1.32634	0.492756	2.69167	0.00710954	0.0427579
TCONS_00006203	182.276	-0.805599	0.299364	-2.69104	0.00712298	0.042805
TCONS_00006486	7.68046	2.02348	0.752085	2.6905	0.0071346	0.0428412
TCONS_00011076	86.7435	1.3261	0.493042	2.68963	0.00715311	0.0429187
TCONS_00016745	82.3597	-0.937291	0.348523	-2.68933	0.00715966	0.0429243
TCONS_00002900	168.316	1.25544	0.466975	2.68845	0.00717852	0.0430036
TCONS_00000727	55.2685	1.21882	0.453481	2.68769	0.00719482	0.0430676
TCONS_00011537	572.917	0.68398	0.254588	2.68661	0.00721807	0.043173
TCONS_00005089	34.7345	1.6738	0.62327	2.68552	0.00724171	0.0432544
TCONS_00015852	70.6273	1.57297	0.585735	2.68546	0.00724299	0.0432544
TCONS_00015243	238.053	-1.61167	0.600429	-2.6842	0.0072703	0.0433836
TCONS_00005194	46.2545	-1.09182	0.406919	-2.68313	0.00729365	0.0434511
TCONS_00012053	197.98	1.47348	0.549187	2.68302	0.00729605	0.0434511
TCONS_00015844	27.457	-1.29602	0.483065	-2.6829	0.00729865	0.0434511
TCONS_00012757	527.406	1.39374	0.519782	2.68139	0.00733164	0.0436136
TCONS_00004952	658.912	1.57818	0.589125	2.67886	0.00738743	0.0438436
TCONS_00007968	38.0384	1.29608	0.483733	2.67933	0.00737698	0.0438436
TCONS_00013485	33.7892	-1.26773	0.473235	-2.67885	0.0073875	0.0438436
TCONS_00003394	39.9301	1.28155	0.47848	2.67839	0.00739781	0.0438707
TCONS_00012043	187.533	1.04774	0.391264	2.67783	0.00741018	0.04391
TCONS_00007316	76.3419	1.32654	0.495546	2.67693	0.00742997	0.0439932
TCONS_00004314	23.0468	1.41657	0.529365	2.67598	0.00745103	0.0440497
TCONS_00004440	55.7211	1.21017	0.452226	2.67602	0.00745027	0.0440497
TCONS_00014083	78.0262	-1.04065	0.389253	-2.67346	0.00750731	0.0443482
TCONS_00002009	436.546	-0.763139	0.285746	-2.67069	0.00756964	0.0446819
TCONS_00013400	108.24	-0.923186	0.345718	-2.67035	0.0075773	0.0446927
TCONS_00002791	113.568	1.02291	0.383124	2.66992	0.00758694	0.0447114
TCONS_00008972	50.3682	1.27804	0.478721	2.66969	0.00759217	0.0447114
TCONS_00006957	22.3884	1.41354	0.529747	2.66833	0.007623	0.044824
TCONS_00011392	275.711	-0.929074	0.348165	-2.66849	0.00761935	0.044824
TCONS_00001818	133.536	1.17206	0.439392	2.66745	0.00764291	0.0449065
TCONS_00015327	238.259	1.42554	0.534543	2.66684	0.00765679	0.0449357
TCONS_00015410	257.626	-0.898418	0.336917	-2.66658	0.00766264	0.0449357
TCONS_00016105	140.095	-0.833837	0.312713	-2.66646	0.00766549	0.0449357
TCONS_00013807	113.257	-0.896784	0.336421	-2.66566	0.00768369	0.0450078
TCONS_00001550	13.1154	1.64982	0.619097	2.66487	0.00770171	0.045052
TCONS_00006545	77.9619	-1.03383	0.387992	-2.66456	0.0077089	0.045052
TCONS_00013684	32.1939	1.51354	0.567978	2.66478	0.00770386	0.045052
TCONS_00007879	54.4377	-1.04121	0.390861	-2.6639	0.0077241	0.0451064
TCONS_00014050	9.51444	1.72289	0.647507	2.6608	0.00779561	0.0454893
TCONS_00014214	102.252	1.2707	0.47812	2.6577	0.00786765	0.0458685
TCONS_00014368	120.795	-0.955546	0.3596	-2.65725	0.00787809	0.0458685
TCONS_00016850	35.591	-1.07909	0.406097	-2.65723	0.0078786	0.0458685
TCONS_00005188	342.902	-0.855377	0.321958	-2.6568	0.00788862	0.045892
TCONS_00012091	158.085	-0.818011	0.308067	-2.6553	0.0079237	0.0460455
TCONS_00014736	63.5694	-0.900455	0.339134	-2.65516	0.00792705	0.0460455
TCONS_00014975	55.7438	-1.08575	0.409243	-2.65307	0.00797637	0.0462969
TCONS_00006580	17.9015	-1.486	0.560241	-2.65243	0.00799148	0.0463494
TCONS_00000208	158.05	0.874314	0.329764	2.65134	0.00801741	0.0464375
TCONS_00011644	45.0841	1.29445	0.488238	2.65128	0.00801881	0.0464375
TCONS_00007297	215.33	0.982381	0.370748	2.64973	0.00805571	0.0466159
TCONS_00011629	139.125	1.161	0.438236	2.64925	0.00806699	0.0466458
TCONS_00006480	105.945	-0.960287	0.362734	-2.64736	0.00811235	0.0468374
TCONS_00009467	12.7132	1.68069	0.634837	2.64743	0.00811061	0.0468374
TCONS_00000587	252.674	1.00052	0.37803	2.64667	0.00812887	0.0468919
TCONS_00007169	20.1687	1.67502	0.63293	2.64645	0.00813405	0.0468919
TCONS_00001715	65.5428	1.49824	0.566337	2.64549	0.00815724	0.0469642
TCONS_00010225	56.3553	0.972906	0.36777	2.64542	0.00815887	0.0469642
TCONS_00007671	14.0935	1.58158	0.598054	2.64454	0.00818025	0.0470518
TCONS_00006581	203.029	-0.769108	0.290858	-2.64427	0.00818665	0.0470533
TCONS_00010788	32.3579	1.54625	0.58497	2.64329	0.00821041	0.0471544
TCONS_00007413	17.17	1.41191	0.534236	2.64286	0.00822085	0.0471789
TCONS_00001110	24.825	1.34426	0.508853	2.64175	0.008248	0.0472992
TCONS_00009164	112.906	1.35966	0.514817	2.64106	0.00826463	0.0473591
TCONS_00003233	164.374	1.0492	0.397579	2.63896	0.00831603	0.047618
TCONS_00003825	858.848	-0.820569	0.311038	-2.63816	0.00833563	0.0476945
TCONS_00009051	173.527	-0.791531	0.300071	-2.63781	0.00834423	0.0477015
TCONS_00011229	65.2501	-1.17634	0.445987	-2.63761	0.00834933	0.0477015
TCONS_00014500	16.3859	-1.37649	0.521981	-2.63705	0.00836307	0.0477444
TCONS_00008758	227.385	-0.936352	0.355146	-2.63653	0.00837593	0.0477465
TCONS_00014093	15.1063	1.4356	0.544458	2.63675	0.00837052	0.0477465
TCONS_00007703	1474.59	1.2048	0.457071	2.63592	0.00839089	0.0477962
TCONS_00007460	301.056	-0.788523	0.299257	-2.63494	0.00841531	0.0478997
TCONS_00002007	184.201	1.18171	0.448975	2.63203	0.00848768	0.0481821
TCONS_00002887	183.565	1.10865	0.421306	2.63146	0.00850193	0.0481821
TCONS_00004509	80.0382	-1.03332	0.392653	-2.63165	0.00849714	0.0481821
TCONS_00008322	29.0718	1.3366	0.507696	2.63267	0.00847159	0.0481821
TCONS_00008323	11.0698	-1.61328	0.613212	-2.63087	0.00851659	0.0481821
TCONS_00012390	95.5127	-1.00253	0.381049	-2.63098	0.00851389	0.0481821
TCONS_00015748	5.31441	-2.0365	0.774138	-2.63067	0.00852162	0.0481821
TCONS_00015922	110.615	-0.963039	0.36593	-2.63176	0.00849449	0.0481821
TCONS_00017004	15.2715	-1.47152	0.559297	-2.63102	0.00851279	0.0481821
TCONS_00006598	126.762	-0.89199	0.339196	-2.62972	0.00854544	0.0482455
TCONS_00008057	37.568	1.12572	0.428048	2.6299	0.00854108	0.0482455
TCONS_00007841	82.5691	-0.907375	0.345213	-2.62845	0.00857748	0.0483906
TCONS_00014567	175.601	-0.855009	0.325327	-2.62815	0.008585	0.0483974
TCONS_00015029	61.8594	0.910024	0.346316	2.62772	0.00859581	0.0484227
TCONS_00002496	146.015	1.19942	0.456597	2.62687	0.00861751	0.0485091
TCONS_00012823	7.43716	1.81943	0.693026	2.62534	0.00865619	0.0486911
TCONS_00007392	474.555	1.02564	0.390781	2.62458	0.0086755	0.0487638
TCONS_00009864	84.7454	-0.922369	0.351808	-2.6218	0.00874674	0.0491282
TCONS_00009517	68.2036	-0.97797	0.373107	-2.62115	0.00876329	0.0491489
TCONS_00010769	12.0071	1.6643	0.634911	2.62131	0.00875919	0.0491489
TCONS_00000329	197.35	-0.989005	0.377536	-2.61963	0.00880246	0.0491938
TCONS_00009061	4.19889	2.03298	0.776082	2.61955	0.00880459	0.0491938
TCONS_00009651	129.521	1.60656	0.613345	2.61935	0.00880988	0.0491938
TCONS_00012883	29.4136	1.39608	0.532884	2.61987	0.00879645	0.0491938
TCONS_00013581	343.138	-0.693607	0.264739	-2.61997	0.00879379	0.0491938
TCONS_00014927	2073.93	-0.677197	0.258476	-2.61996	0.0087941	0.0491938
TCONS_00001544	23.3049	1.30404	0.498265	2.61716	0.00886646	0.0494737
TCONS_00003293	119.422	-0.96992	0.370822	-2.6156	0.0089072	0.0496478
TCONS_00013562	84.8781	1.35872	0.519493	2.61546	0.00891064	0.0496478
TCONS_00005460	130.506	0.966276	0.369572	2.61458	0.00893361	0.0497396
TCONS_00000043	234.695	1.11321	0.425874	2.61395	0.00895026	0.049796
TCONS_00011919	165.122	-0.829374	0.317432	-2.61276	0.00898147	0.0499047
TCONS_00015700	288.207	-0.75217	0.287889	-2.61271	0.00898285	0.0499047
TCONS_00005812	11.4472	-1.55766	0.596541	-2.61116	0.00902359	0.0500947
TCONS_00001349	17.074	1.46272	0.560868	2.60796	0.00910838	0.0505287
TCONS_00001970	68.9706	-0.973416	0.373516	-2.60609	0.00915818	0.0507382
TCONS_00004613	99.5302	1.09337	0.41955	2.60605	0.00915941	0.0507382
TCONS_00011045	57.053	1.25984	0.483552	2.60538	0.00917722	0.0508001
TCONS_00001507	170.152	-0.875811	0.336337	-2.60397	0.00921499	0.0509723
TCONS_00016352	54.0517	1.07002	0.411088	2.6029	0.00924385	0.051095
TCONS_00001076	6.6454	1.83641	0.705759	2.60204	0.00926723	0.0511134
TCONS_00006243	26.6149	1.17381	0.451096	2.60213	0.00926462	0.0511134
TCONS_00009686	30.4258	1.40358	0.53936	2.60231	0.00925991	0.0511134
TCONS_00000155	170.275	1.21946	0.468928	2.60053	0.00930804	0.0513012
TCONS_00007606	16.4092	1.70692	0.656438	2.60028	0.00931468	0.0513012
TCONS_00004615	36.5841	1.35044	0.519879	2.59759	0.00938793	0.0516471
TCONS_00016759	22.8319	1.68385	0.648261	2.59748	0.009391	0.0516471
TCONS_00000585	32.706	-1.1683	0.449873	-2.59697	0.0094051	0.0516875
TCONS_00000858	401.402	1.10592	0.426957	2.59025	0.00959071	0.0522943
TCONS_00001175	70.4678	1.06605	0.411381	2.59138	0.00955913	0.0522943
TCONS_00003450	31.997	-1.13856	0.43949	-2.59064	0.0095799	0.0522943
TCONS_00003757	45.4745	1.3913	0.536931	2.59122	0.00956372	0.0522943
TCONS_00003878	25.4544	1.16172	0.448328	2.59122	0.00956361	0.0522943
TCONS_00004567	220.538	-0.956008	0.368891	-2.59157	0.0095538	0.0522943
TCONS_00005748	107.709	1.07629	0.415328	2.59143	0.00955791	0.0522943
TCONS_00007906	44.3738	-1.07982	0.416813	-2.59066	0.00957913	0.0522943
TCONS_00008358	316.8	-0.771539	0.297848	-2.59038	0.00958701	0.0522943
TCONS_00009071	49.9822	-1.01648	0.392063	-2.59264	0.00952428	0.0522943
TCONS_00012264	27.2229	1.49387	0.576688	2.59043	0.00958551	0.0522943
TCONS_00002142	68.2674	1.3721	0.529971	2.58901	0.00962519	0.052445
TCONS_00003238	24.7404	1.37759	0.532242	2.58827	0.00964587	0.0525202
TCONS_00001674	298.167	-0.728831	0.28177	-2.58662	0.00969227	0.0527353
TCONS_00000123	1105.76	-0.65055	0.251732	-2.58429	0.00975789	0.0527581
TCONS_00000320	124.441	-0.850535	0.329086	-2.58454	0.00975092	0.0527581
TCONS_00000396	13.2837	1.66618	0.644738	2.58427	0.00975853	0.0527581
TCONS_00000641	42.6053	-1.13537	0.439179	-2.58521	0.00973201	0.0527581
TCONS_00001235	28.8548	1.1497	0.444555	2.58619	0.00970441	0.0527581
TCONS_00001707	63.2012	1.28128	0.495792	2.58431	0.00975737	0.0527581
TCONS_00003593	86.9946	-1.11102	0.4299	-2.58436	0.00975595	0.0527581
TCONS_00007300	390.364	-0.64216	0.248354	-2.58566	0.00971917	0.0527581
TCONS_00007608	40.9545	1.10972	0.429335	2.58474	0.00974539	0.0527581
TCONS_00000282	89.55	-0.824485	0.319207	-2.58291	0.00979698	0.0529286
TCONS_00014254	208.737	-1.00247	0.388198	-2.58236	0.00981268	0.052976
TCONS_00006663	181.949	-0.752703	0.291551	-2.58172	0.00983092	0.0530371
TCONS_00012107	102.711	-0.975228	0.37792	-2.58051	0.00986536	0.0531854
TCONS_00002181	60.7983	1.08455	0.420365	2.58003	0.00987928	0.0532229
TCONS_00002150	15.8625	1.83657	0.711992	2.57947	0.00989508	0.0532705
TCONS_00008239	147.839	1.55879	0.604594	2.57825	0.00993026	0.0534223
TCONS_00002350	715.696	-0.732249	0.284128	-2.57718	0.00996093	0.0535245
TCONS_00006184	190.41	-0.781844	0.303406	-2.57689	0.00996935	0.0535245
TCONS_00008909	542.362	1.25446	0.486832	2.57678	0.00997261	0.0535245
TCONS_00013487	55.5588	-0.972046	0.377257	-2.57662	0.00997724	0.0535245
TCONS_00015677	438.1	1.00201	0.38905	2.57553	0.0100086	0.0536551
TCONS_00000894	4.90455	2.03361	0.789751	2.575	0.0100241	0.0537006
TCONS_00005819	13.9954	1.63375	0.634683	2.57412	0.0100494	0.0537609
TCONS_00014686	4.68894	2.06332	0.801507	2.5743	0.0100442	0.0537609
TCONS_00000888	507.224	1.27911	0.497446	2.57136	0.0101299	0.0541535
TCONS_00002548	91.5896	0.935964	0.364192	2.56997	0.0101706	0.0542206
TCONS_00002960	21.016	-1.46117	0.568501	-2.57022	0.0101633	0.0542206
TCONS_00004048	28.0929	-1.24805	0.485627	-2.56997	0.0101708	0.0542206
TCONS_00009768	93.6898	-0.85314	0.331933	-2.57022	0.0101634	0.0542206
TCONS_00004611	125.707	1.1188	0.4355	2.569	0.0101992	0.0543344
TCONS_00006870	230.882	-0.805809	0.313768	-2.56817	0.0102238	0.0544273
TCONS_00001787	685.578	-0.699451	0.2724	-2.56774	0.0102364	0.0544566
TCONS_00008053	71.7279	1.33855	0.521442	2.56701	0.0102579	0.054533
TCONS_00005341	55.662	-1.0207	0.39767	-2.5667	0.0102672	0.0545443
TCONS_00012135	115.202	1.13515	0.442359	2.56613	0.010284	0.0545956
TCONS_00015918	46.6993	1.19371	0.465233	2.56584	0.0102926	0.0546038
TCONS_00011917	25.0767	1.64576	0.641557	2.56525	0.0103101	0.0546584
TCONS_00005250	29.5627	1.42809	0.556879	2.56446	0.0103338	0.054713
TCONS_00005995	249.419	1.03853	0.404976	2.56443	0.0103347	0.054713
TCONS_00004447	128.384	1.30957	0.510833	2.56359	0.0103594	0.0547861
TCONS_00008258	114.798	1.06269	0.414548	2.56348	0.0103628	0.0547861
TCONS_00010637	38.4303	1.35358	0.528117	2.56304	0.0103761	0.0548187
TCONS_00008731	5.78526	-1.90895	0.745663	-2.56007	0.0104652	0.0551929
TCONS_00009593	932.31	0.719702	0.281139	2.55995	0.0104686	0.0551929
TCONS_00014065	7.60027	-1.72225	0.672669	-2.56033	0.0104574	0.0551929
TCONS_00013670	292.132	-0.809208	0.316167	-2.55943	0.0104844	0.0552379
TCONS_00002295	126.152	-0.882997	0.345079	-2.55883	0.0105026	0.0552581
TCONS_00009570	23.2351	1.25767	0.491482	2.55894	0.0104992	0.0552581
TCONS_00001204	146.266	1.02792	0.401794	2.55833	0.0105176	0.0552852
TCONS_00011902	577.544	-0.722551	0.282448	-2.55818	0.0105223	0.0552852
TCONS_00002919	5.43656	1.83732	0.718456	2.55732	0.0105484	0.0553234
TCONS_00009933	97.4224	-0.848005	0.331579	-2.55748	0.0105435	0.0553234
TCONS_00016920	15.4001	1.68111	0.657399	2.55722	0.0105512	0.0553234
TCONS_00011887	4725.16	-0.793236	0.310263	-2.55665	0.0105685	0.0553758
TCONS_00000290	84.9016	-0.928002	0.363261	-2.55465	0.0106296	0.0553874
TCONS_00001287	37.6558	1.49706	0.585873	2.55527	0.0106106	0.0553874
TCONS_00003788	141.805	0.931534	0.364598	2.55496	0.0106199	0.0553874
TCONS_00004594	41.164	-1.29286	0.506123	-2.55444	0.0106358	0.0553874
TCONS_00005820	55.3462	-1.00792	0.394367	-2.55578	0.010595	0.0553874
TCONS_00007865	126.659	-0.783831	0.306844	-2.5545	0.0106342	0.0553874
TCONS_00010034	375.973	-0.837767	0.32775	-2.55612	0.0105847	0.0553874
TCONS_00012936	17.5766	1.30735	0.511667	2.55507	0.0106165	0.0553874
TCONS_00015975	332.724	-0.846502	0.331322	-2.55492	0.0106212	0.0553874
TCONS_00011291	46.6511	1.28783	0.504376	2.55331	0.0106705	0.0555303
TCONS_00006065	5.02289	2.02815	0.795502	2.54952	0.0107871	0.0560789
TCONS_00007702	12.8587	1.71762	0.673798	2.54917	0.0107979	0.0560789
TCONS_00012198	721.75	-0.772916	0.303189	-2.54929	0.0107943	0.0560789
TCONS_00005147	703.737	-0.733957	0.287983	-2.54861	0.0108152	0.0561185
TCONS_00005675	63.5763	-0.909528	0.356928	-2.54822	0.0108276	0.0561185
TCONS_00008623	181.039	1.1001	0.431688	2.54837	0.0108227	0.0561185
TCONS_00014476	72.1551	-0.929288	0.364748	-2.54775	0.0108419	0.0561545
TCONS_00006522	57.6434	1.27111	0.498988	2.54737	0.0108539	0.056179
TCONS_00002439	112.345	0.924253	0.362872	2.54705	0.0108638	0.0561919
TCONS_00001595	26.0837	1.23207	0.483854	2.54637	0.010885	0.0562258
TCONS_00004101	44.7299	1.40933	0.553462	2.54638	0.0108845	0.0562258
TCONS_00001148	88.1784	-1.09925	0.431875	-2.5453	0.0109184	0.0563471
TCONS_00003861	33.285	-1.31064	0.514955	-2.54515	0.0109232	0.0563471
TCONS_00009233	25.6997	1.31481	0.516648	2.54489	0.0109313	0.0563506
TCONS_00004994	86.889	-0.942557	0.370422	-2.54455	0.0109418	0.0563668
TCONS_00008221	47.0652	1.40538	0.552644	2.54301	0.0109902	0.0564899
TCONS_00008389	18.8804	1.32746	0.521899	2.54351	0.0109744	0.0564899
TCONS_00008492	1024.31	0.6503	0.255708	2.54314	0.0109862	0.0564899
TCONS_00011292	1322.16	1.10744	0.435511	2.54285	0.0109952	0.0564899
TCONS_00006426	24.201	1.19157	0.468752	2.54201	0.0110218	0.0565507
TCONS_00009241	74.4426	1.08865	0.428234	2.54218	0.0110163	0.0565507
TCONS_00001166	14.6644	1.53525	0.604707	2.53883	0.0111223	0.0570088
TCONS_00010385	32.4394	-1.1997	0.472576	-2.53864	0.0111285	0.0570088
TCONS_00015907	92.0791	-0.86969	0.342602	-2.53848	0.0111335	0.0570088
TCONS_00002594	14.0653	1.53535	0.605118	2.53727	0.0111722	0.057138
TCONS_00010708	197.622	0.8092	0.318932	2.53722	0.0111737	0.057138
TCONS_00005376	19.5194	-1.40643	0.554417	-2.53677	0.011188	0.0571548
TCONS_00013772	18.4335	1.58466	0.624705	2.53665	0.0111919	0.0571548
TCONS_00005299	25.1213	1.3282	0.523686	2.53625	0.0112047	0.0571819
TCONS_00009635	95.4522	-0.833581	0.328711	-2.53591	0.0112156	0.0571995
TCONS_00004779	64.0389	1.21579	0.479568	2.53518	0.0112391	0.0572812
TCONS_00006014	30.4846	1.30165	0.513772	2.53353	0.0112921	0.0575131
TCONS_00014893	15.0804	1.46347	0.577831	2.53269	0.011319	0.0576119
TCONS_00006482	40.1157	1.16906	0.46171	2.53201	0.0113409	0.0576849
TCONS_00008441	286.754	-0.762735	0.301303	-2.53146	0.0113589	0.0576997
TCONS_00011503	449.231	0.789129	0.311717	2.53156	0.0113556	0.0576997
TCONS_00004240	5.87546	1.83287	0.724375	2.53028	0.011397	0.0578143
TCONS_00005199	176.454	-0.745819	0.294783	-2.53006	0.0114041	0.0578143
TCONS_00008156	317.371	0.901545	0.356307	2.53025	0.0113982	0.0578143
TCONS_00010765	7.83727	1.94746	0.770265	2.5283	0.0114618	0.058068
TCONS_00011408	83.4478	1.00081	0.395931	2.52774	0.01148	0.0581216
TCONS_00004904	83.7112	1.12555	0.445437	2.52685	0.0115091	0.0582304
TCONS_00011047	63.2701	1.09392	0.433097	2.5258	0.0115435	0.0583658
TCONS_00013349	17.2954	1.43868	0.569776	2.525	0.0115698	0.0584605
TCONS_00008068	137.965	1.06397	0.421472	2.52441	0.0115892	0.0585195
TCONS_00016769	17.8205	-1.43092	0.566905	-2.52409	0.0115997	0.058534
TCONS_00009880	14.5154	-1.53592	0.608646	-2.52351	0.0116191	0.0585931
TCONS_00014817	23.2126	-1.34873	0.534768	-2.52208	0.0116664	0.058793
TCONS_00004603	81.9486	-1.0892	0.4321	-2.52071	0.0117119	0.0589541
TCONS_00006751	161.909	0.935928	0.371406	2.51996	0.0117369	0.0589541
TCONS_00008781	185.1	-0.804707	0.319326	-2.52002	0.0117349	0.0589541
TCONS_00010050	261.647	-0.753738	0.299032	-2.52059	0.0117157	0.0589541
TCONS_00016499	12.2071	1.49546	0.593362	2.52031	0.0117252	0.0589541
TCONS_00002733	29.8685	-1.42335	0.565315	-2.5178	0.0118091	0.059212
TCONS_00003747	33.0729	1.13283	0.449941	2.51773	0.0118114	0.059212
TCONS_00011806	6.22721	-1.89335	0.751936	-2.51796	0.0118037	0.059212
TCONS_00006488	4.65353	1.94933	0.774365	2.51732	0.0118251	0.0592418
TCONS_00003380	116.461	0.97821	0.388782	2.51609	0.0118665	0.0593714
TCONS_00008000	30.1501	-1.22636	0.487389	-2.51618	0.0118636	0.0593714
TCONS_00005800	23.6342	1.24953	0.49673	2.51551	0.0118861	0.0593915
TCONS_00010560	19.5055	1.38708	0.551388	2.51562	0.0118822	0.0593915
TCONS_00013780	470.708	-0.623808	0.24812	-2.51414	0.0119323	0.0595834
TCONS_00007393	145.607	-0.798493	0.317662	-2.51365	0.0119488	0.0596268
TCONS_00001698	152.457	1.01325	0.403195	2.51306	0.0119689	0.0596883
TCONS_00014264	173.034	0.842306	0.335249	2.51248	0.0119885	0.0597474
TCONS_00002631	127.671	-0.888259	0.354151	-2.50814	0.012137	0.0603735
TCONS_00013859	125.954	0.968964	0.386313	2.50823	0.0121337	0.0603735
TCONS_00016111	186.307	-0.856334	0.341426	-2.50811	0.0121378	0.0603735
TCONS_00000393	110.258	0.997973	0.398076	2.50699	0.0121765	0.060408
TCONS_00001969	96.7276	1.5611	0.622925	2.50608	0.012208	0.060408
TCONS_00004196	98.2014	-0.809237	0.322782	-2.50707	0.0121737	0.060408
TCONS_00007524	484.877	-0.854709	0.340892	-2.50727	0.0121667	0.060408
TCONS_00009868	91.1507	-0.973209	0.388325	-2.50617	0.0122046	0.060408
TCONS_00010513	73.8217	0.885223	0.353192	2.50635	0.0121985	0.060408
TCONS_00010816	24.4123	1.3655	0.544729	2.50675	0.0121847	0.060408
TCONS_00016141	428.622	1.16233	0.463639	2.50698	0.0121769	0.060408
TCONS_00001088	88.7938	1.32259	0.527851	2.50561	0.012224	0.0604485
TCONS_00008545	23.7097	1.29842	0.518388	2.50472	0.0122547	0.0604829
TCONS_00011223	375.003	-0.712415	0.284425	-2.50476	0.0122534	0.0604829
TCONS_00011747	1495.89	1.05045	0.419374	2.5048	0.012252	0.0604829
TCONS_00013069	122.79	0.921052	0.367792	2.50428	0.0122702	0.0605203
TCONS_00009572	53.1584	1.21982	0.487153	2.50398	0.0122805	0.060532
TCONS_00008003	511.22	-0.886715	0.354234	-2.50319	0.0123079	0.060628
TCONS_00008932	319.728	1.49649	0.597966	2.50263	0.0123274	0.060681
TCONS_00012884	74.4972	1.09912	0.439223	2.50243	0.0123345	0.060681
TCONS_00007920	65.079	-0.922663	0.368918	-2.501	0.0123844	0.0608332
TCONS_00009869	249.045	0.737951	0.295079	2.50086	0.0123893	0.0608332
TCONS_00009973	82.198	1.2948	0.517659	2.50126	0.0123752	0.0608332
TCONS_00004539	170.685	-0.70118	0.280477	-2.49996	0.0124207	0.0609484
TCONS_00003694	3.88562	-1.98598	0.79501	-2.49806	0.0124875	0.0611986
TCONS_00011926	44.819	1.12034	0.44849	2.49804	0.0124883	0.0611986
TCONS_00014503	20.5851	-1.42825	0.571796	-2.49783	0.0124957	0.0611986
TCONS_00007697	35.0692	1.33178	0.533275	2.49736	0.0125122	0.0612399
TCONS_00002393	12.2566	1.50503	0.602793	2.49675	0.0125336	0.0612879
TCONS_00008517	509.773	0.959065	0.384144	2.49663	0.012538	0.0612879
TCONS_00004635	36.905	1.26268	0.50591	2.49586	0.0125651	0.0613814
TCONS_00015984	70.8577	0.899944	0.360688	2.49508	0.0125929	0.0614386
TCONS_00016630	944.293	-0.718219	0.287851	-2.49511	0.0125919	0.0614386
TCONS_00004435	8.42411	1.9206	0.769847	2.49479	0.0126032	0.0614498
TCONS_00007038	177.647	-0.723075	0.289954	-2.49376	0.0126399	0.0615894
TCONS_00004669	34.8364	1.24586	0.49974	2.49301	0.0126664	0.061679
TCONS_00011207	46.9641	-1.07506	0.431407	-2.49198	0.0127032	0.0618192
TCONS_00003049	85.7103	-0.847332	0.340102	-2.4914	0.012724	0.0618415
TCONS_00004792	81.2457	-0.879521	0.353006	-2.49151	0.01272	0.0618415
TCONS_00015940	167.648	-1.14442	0.459735	-2.4893	0.0127995	0.0621691
TCONS_00016563	14.0196	-1.59334	0.640209	-2.48878	0.0128181	0.0622199
TCONS_00014160	85.0836	-0.948687	0.381558	-2.48635	0.012906	0.0626069
TCONS_00009642	5.64127	1.83027	0.736273	2.48585	0.0129241	0.0626551
TCONS_00016592	719.647	-0.842747	0.339221	-2.48436	0.0129785	0.0628789
TCONS_00002309	10.5993	1.57646	0.635043	2.48244	0.0130486	0.0631782
TCONS_00015368	57.1651	1.51096	0.608803	2.48185	0.0130703	0.0632435
TCONS_00005726	646.596	-0.598237	0.241154	-2.48072	0.0131116	0.0633694
TCONS_00009767	157.425	-0.73619	0.296768	-2.48069	0.0131129	0.0633694
TCONS_00008934	20.4792	1.26365	0.509555	2.47991	0.0131414	0.0634672
TCONS_00000489	111.48	-0.867838	0.350024	-2.47937	0.0131615	0.0635238
TCONS_00003377	22.824	-1.32477	0.534515	-2.47845	0.0131953	0.0635658
TCONS_00007437	118.001	-0.858717	0.346535	-2.47801	0.0132117	0.0635658
TCONS_00007773	334.804	-0.732206	0.295412	-2.4786	0.0131901	0.0635658
TCONS_00008172	189.142	-0.768193	0.31	-2.47804	0.0132105	0.0635658
TCONS_00008878	89.0451	-0.894815	0.361055	-2.47833	0.0131999	0.0635658
TCONS_00002092	35.2899	-1.04227	0.420863	-2.47651	0.0132672	0.0637528
TCONS_00013993	16.042	1.64748	0.665243	2.47651	0.0132672	0.0637528
TCONS_00000298	21.6619	1.27246	0.513951	2.47583	0.0132925	0.0638276
TCONS_00016427	46.9232	-1.02963	0.415903	-2.47565	0.0132995	0.0638276
TCONS_00004262	48.8171	1.22113	0.493369	2.47508	0.0133207	0.0638893
TCONS_00005135	15.7179	-1.50877	0.60982	-2.47413	0.0133563	0.063965
TCONS_00006445	64.1608	-1.17098	0.473251	-2.47432	0.013349	0.063965
TCONS_00016820	105.513	-0.91809	0.371098	-2.47398	0.0133616	0.063965
TCONS_00005133	56.4868	-0.897565	0.362889	-2.47339	0.0133839	0.0640318
TCONS_00009391	51.2796	1.02883	0.416027	2.47298	0.0133992	0.0640647
TCONS_00010040	7.25789	1.76875	0.715307	2.47272	0.013409	0.0640719
TCONS_00008604	67.2408	-0.967957	0.391564	-2.47203	0.0134349	0.0641557
TCONS_00002458	283.874	-0.842112	0.340693	-2.47176	0.0134449	0.0641631
TCONS_00013058	34.2276	-1.07066	0.43342	-2.47027	0.0135013	0.064392
TCONS_00002260	474.08	-0.712033	0.28846	-2.4684	0.0135719	0.0646082
TCONS_00009303	41.6509	-1.14477	0.463704	-2.46876	0.0135583	0.0646082
TCONS_00016153	424.275	-0.691744	0.280232	-2.46847	0.0135692	0.0646082
TCONS_00013310	295.179	1.26406	0.512348	2.46719	0.0136179	0.0647865
TCONS_00010447	37.7226	1.24432	0.504848	2.46474	0.0137112	0.0651898
TCONS_00015657	40.1211	-1.08573	0.440574	-2.46435	0.0137262	0.065221
TCONS_00011277	401.878	-0.643117	0.261016	-2.4639	0.0137436	0.0652628
TCONS_00002246	119.324	-0.844739	0.343135	-2.46183	0.0138231	0.065478
TCONS_00007438	243.969	-0.844357	0.342937	-2.46213	0.0138113	0.065478
TCONS_00008489	378.009	-0.674916	0.274146	-2.46189	0.0138208	0.065478
TCONS_00013678	29.474	1.41811	0.575896	2.46244	0.0137995	0.065478
TCONS_00006856	383.199	-0.701251	0.284979	-2.46071	0.0138662	0.0656411
TCONS_00000892	203.128	1.11705	0.454147	2.45967	0.0139066	0.0656701
TCONS_00003234	40.1567	1.37409	0.558578	2.45999	0.0138943	0.0656701
TCONS_00004748	28.9513	1.12562	0.457607	2.45978	0.0139021	0.0656701
TCONS_00005941	7.39829	1.76819	0.718709	2.46022	0.013885	0.0656701
TCONS_00008158	17.3976	-1.3518	0.54996	-2.458	0.0139713	0.0659108
TCONS_00016889	1937.75	-0.654875	0.266436	-2.45791	0.0139748	0.0659108
TCONS_00007066	8.12229	1.62007	0.659415	2.45682	0.0140172	0.0660291
TCONS_00009052	130.907	-0.862565	0.351066	-2.45699	0.0140106	0.0660291
TCONS_00008034	47.714	1.31861	0.537097	2.45508	0.0140854	0.0663098
TCONS_00007389	65.321	1.0846	0.441823	2.45484	0.0140948	0.0663132
TCONS_00006110	34.3577	1.4184	0.577954	2.45417	0.0141209	0.0663952
TCONS_00008710	31.5857	1.10375	0.449934	2.45315	0.0141612	0.0665437
TCONS_00003086	102.387	0.868175	0.353968	2.45269	0.0141792	0.0665465
TCONS_00011427	101.701	-0.895531	0.365107	-2.45279	0.0141754	0.0665465
TCONS_00009179	397.043	-0.697148	0.284288	-2.45226	0.0141961	0.066585
TCONS_00003041	73.614	1.16687	0.475884	2.45201	0.0142061	0.0665912
TCONS_00003667	196.387	-0.702348	0.28669	-2.44985	0.0142917	0.0668471
TCONS_00008092	7.13644	1.80149	0.73551	2.44931	0.0143131	0.0668471
TCONS_00012154	623.588	1.37171	0.559973	2.4496	0.0143015	0.0668471
TCONS_00013982	150.247	-0.821162	0.335238	-2.44949	0.0143059	0.0668471
TCONS_00015018	8.34059	1.88709	0.770276	2.44989	0.0142901	0.0668471
TCONS_00015190	9.50379	1.63515	0.667399	2.45004	0.0142841	0.0668471
TCONS_00016680	19.8527	1.52636	0.623254	2.44902	0.0143246	0.0668597
TCONS_00013491	13.8515	-1.45039	0.592366	-2.44847	0.0143464	0.0668852
TCONS_00013777	50.1339	0.914583	0.373537	2.44844	0.0143475	0.0668852
TCONS_00005095	314.519	-0.749536	0.306187	-2.44796	0.0143666	0.0669333
TCONS_00001867	5.36295	1.80008	0.735788	2.44647	0.0144265	0.0671304
TCONS_00010099	195.67	1.05885	0.432804	2.44649	0.0144256	0.0671304
TCONS_00000165	473.988	-0.748871	0.306253	-2.44527	0.0144745	0.0672483
TCONS_00001068	6.25215	-1.80109	0.736917	-2.44408	0.0145221	0.0672483
TCONS_00003408	144.587	-0.769097	0.314611	-2.4446	0.0145013	0.0672483
TCONS_00004953	147.051	0.848578	0.347146	2.44444	0.0145076	0.0672483
TCONS_00007753	10.4089	1.51929	0.621608	2.44413	0.0145202	0.0672483
TCONS_00007768	225.246	-0.694538	0.28408	-2.44486	0.0144907	0.0672483
TCONS_00014808	107.432	-0.848444	0.347129	-2.44418	0.0145183	0.0672483
TCONS_00016342	14.5682	1.41401	0.578193	2.44557	0.0144624	0.0672483
TCONS_00002910	33.7515	1.19395	0.48864	2.44341	0.0145492	0.0673332
TCONS_00004935	79.1859	-0.90239	0.369559	-2.44181	0.014614	0.0675921
TCONS_00003082	182.361	-0.68997	0.282602	-2.44148	0.014627	0.0676112
TCONS_00003335	493.596	0.64177	0.263042	2.4398	0.0146952	0.0677629
TCONS_00007780	750.442	-0.671651	0.27525	-2.44015	0.0146811	0.0677629
TCONS_00010902	66.4563	-0.821566	0.336656	-2.44037	0.0146721	0.0677629
TCONS_00011334	152.972	-1.03123	0.422653	-2.4399	0.0146912	0.0677629
TCONS_00002912	11.2038	1.51601	0.621623	2.4388	0.0147362	0.067911
TCONS_00005220	87.1198	-0.882357	0.361847	-2.43848	0.0147492	0.0679297
TCONS_00004194	52.9209	1.17807	0.483215	2.43799	0.014769	0.0679393
TCONS_00013508	13.3016	1.52581	0.625832	2.43806	0.0147664	0.0679393
TCONS_00002683	14.0536	1.72951	0.709479	2.43772	0.0147801	0.0679492
TCONS_00006054	113.117	-0.773475	0.317352	-2.43727	0.0147985	0.0679929
TCONS_00007538	24.3337	1.30743	0.536561	2.43668	0.0148228	0.0680229
TCONS_00012331	128.693	0.837416	0.343656	2.43678	0.0148185	0.0680229
TCONS_00006157	7.3002	1.71308	0.703309	2.43574	0.0148614	0.0680777
TCONS_00013893	8.59914	1.6502	0.677454	2.43589	0.0148551	0.0680777
TCONS_00013926	47.768	1.02155	0.419362	2.43597	0.0148518	0.0680777
TCONS_00011458	92.956	-0.819753	0.336731	-2.43444	0.0149147	0.0681995
TCONS_00015916	130.239	-0.945257	0.38826	-2.4346	0.0149084	0.0681995
TCONS_00016928	257.88	0.876132	0.359887	2.43446	0.0149139	0.0681995
TCONS_00013744	69.5578	-0.922643	0.379128	-2.43359	0.01495	0.0683199
TCONS_00001091	43.9439	-1.01827	0.418554	-2.43283	0.0149815	0.0684202
TCONS_00001545	69.4418	1.20627	0.495872	2.43262	0.0149898	0.0684202
TCONS_00003367	342.961	-0.689322	0.2835	-2.43147	0.0150378	0.0685983
TCONS_00000898	53.0752	1.13583	0.467258	2.43084	0.0150639	0.0686567
TCONS_00003309	14.886	1.5242	0.627053	2.43073	0.0150686	0.0686567
TCONS_00014353	88.0967	0.895527	0.368624	2.42938	0.0151249	0.0688722
TCONS_00002720	414.723	-0.632951	0.260605	-2.42877	0.0151501	0.0689049
TCONS_00007758	233.455	1.11597	0.459441	2.42898	0.0151413	0.0689049
TCONS_00016364	123.849	0.839697	0.345776	2.42844	0.0151638	0.0689262
TCONS_00012668	79.3772	-0.822923	0.339092	-2.42684	0.0152309	0.0691901
TCONS_00000784	31.5437	1.43218	0.590236	2.42645	0.0152475	0.0692245
TCONS_00013094	3.9203	-1.93878	0.799182	-2.42595	0.0152683	0.0692779
TCONS_00002935	28.3903	-1.11245	0.458946	-2.42392	0.0153541	0.0696104
TCONS_00012465	59.0866	-0.893738	0.368737	-2.42378	0.0153598	0.0696104
TCONS_00011418	226.401	0.975251	0.402421	2.42346	0.0153735	0.0696312
TCONS_00001433	32.89	-1.14311	0.471801	-2.42286	0.0153988	0.0697045
TCONS_00003108	97.7555	0.900118	0.371599	2.42228	0.0154234	0.0697745
TCONS_00010553	40.9066	1.19496	0.493389	2.42195	0.0154375	0.0697973
TCONS_00005219	57.0508	1.30029	0.536961	2.42157	0.0154534	0.069828
TCONS_00000437	33.7742	1.49342	0.617034	2.42031	0.0155071	0.0699465
TCONS_00003945	229.242	-0.783524	0.323698	-2.42054	0.0154975	0.0699465
TCONS_00007026	106.709	-0.803129	0.331808	-2.42046	0.0155007	0.0699465
TCONS_00015251	38.8161	-1.20666	0.498633	-2.41994	0.0155232	0.069978
TCONS_00010701	36.696	1.18615	0.490331	2.41909	0.0155594	0.0700998
TCONS_00003574	10.3941	1.56751	0.648129	2.41851	0.015584	0.0701694
TCONS_00012229	8.57965	1.57821	0.652654	2.41815	0.0155997	0.0701987
TCONS_00002242	170.667	-0.697101	0.288348	-2.41756	0.0156248	0.0702705
TCONS_00000597	20.147	1.2546	0.519079	2.41696	0.0156506	0.0703036
TCONS_00006098	7.53725	-1.90277	0.787246	-2.41699	0.0156494	0.0703036
TCONS_00014851	22.8284	-1.22478	0.506829	-2.41654	0.0156686	0.0703432
TCONS_00000886	10.8277	1.74608	0.722808	2.41569	0.0157055	0.0704676
TCONS_00000947	56.9391	1.14585	0.474413	2.41531	0.0157219	0.0704997
TCONS_00012139	18060.1	-0.593353	0.245707	-2.41487	0.0157407	0.0705425
TCONS_00005894	7.20933	1.74534	0.723097	2.41371	0.0157911	0.0707273
TCONS_00006823	396.173	1.01439	0.420319	2.41337	0.0158056	0.070729
TCONS_00013869	14.8697	1.42092	0.588792	2.41327	0.01581	0.070729
TCONS_00000766	135.148	1.03222	0.428087	2.41124	0.0158982	0.0707599
TCONS_00001358	79.6762	-0.867028	0.359421	-2.41229	0.0158526	0.0707599
TCONS_00006857	129.254	-0.813618	0.337419	-2.4113	0.0158959	0.0707599
TCONS_00009561	14.6928	1.35611	0.562337	2.41156	0.0158843	0.0707599
TCONS_00010003	114.468	-0.856102	0.35505	-2.41122	0.0158993	0.0707599
TCONS_00010672	6.47123	1.90428	0.78938	2.41237	0.015849	0.0707599
TCONS_00012684	39.6532	1.12398	0.466065	2.41165	0.0158805	0.0707599
TCONS_00013832	156.333	1.00187	0.415323	2.41227	0.0158536	0.0707599
TCONS_00016876	11.6727	-1.51693	0.62912	-2.4112	0.0159002	0.0707599
TCONS_00005750	362.398	-0.753209	0.31242	-2.41089	0.0159136	0.0707787
TCONS_00002862	9.38861	1.49169	0.618882	2.4103	0.0159393	0.0708517
TCONS_00001658	26.1654	1.21666	0.505042	2.40903	0.015995	0.0710166
TCONS_00002301	85.434	-0.776382	0.322253	-2.40923	0.0159862	0.0710166
TCONS_00003414	439.068	0.996583	0.414074	2.40678	0.016094	0.0714028
TCONS_00013867	99.1996	-0.791276	0.328791	-2.40663	0.0161006	0.0714028
TCONS_00016681	363.633	-0.617468	0.256594	-2.4064	0.0161106	0.0714057
TCONS_00009688	31.6591	1.15527	0.480155	2.40603	0.0161269	0.0714365
TCONS_00004247	43.8754	1.32381	0.550273	2.40573	0.0161402	0.0714539
TCONS_00000032	89.7523	-0.785737	0.326923	-2.40343	0.0162419	0.0715559
TCONS_00001039	58.6967	-0.847903	0.352841	-2.40308	0.0162578	0.0715559
TCONS_00002479	816.48	-0.593955	0.247174	-2.40298	0.0162619	0.0715559
TCONS_00004642	88.0565	1.11644	0.464562	2.40322	0.0162515	0.0715559
TCONS_00005469	79.391	-0.837493	0.348372	-2.40402	0.0162159	0.0715559
TCONS_00006021	416.111	0.628422	0.26137	2.40433	0.016202	0.0715559
TCONS_00007990	9.57395	1.47218	0.612436	2.40381	0.0162251	0.0715559
TCONS_00009678	311.09	-0.691461	0.287727	-2.40319	0.0162529	0.0715559
TCONS_00011206	270.257	-0.755893	0.314577	-2.40289	0.0162661	0.0715559
TCONS_00013748	64.38	-0.930511	0.387178	-2.40332	0.016247	0.0715559
TCONS_00014910	42.5976	1.26988	0.528127	2.4045	0.0161947	0.0715559
TCONS_00016701	82.5367	-0.809611	0.337076	-2.40187	0.0163117	0.0717153
TCONS_00001124	18.8434	1.38242	0.575845	2.40068	0.0163646	0.0717418
TCONS_00001315	159.307	0.713422	0.297153	2.40086	0.0163567	0.0717418
TCONS_00008324	32.2469	-1.0145	0.422481	-2.40129	0.0163372	0.0717418
TCONS_00012495	69.1425	-0.881936	0.367251	-2.40146	0.01633	0.0717418
TCONS_00016523	15.721	-1.39665	0.581682	-2.40105	0.0163482	0.0717418
TCONS_00005496	145.234	-0.803424	0.334755	-2.40004	0.0163934	0.0718228
TCONS_00007408	54.4108	1.09082	0.454575	2.39964	0.016411	0.0718228
TCONS_00008501	141.165	0.986788	0.411224	2.39964	0.0164113	0.0718228
TCONS_00001501	210.334	-0.77977	0.325057	-2.39887	0.0164457	0.0718923
TCONS_00014306	54.6987	-0.945196	0.394018	-2.39887	0.016446	0.0718923
TCONS_00001938	221.342	0.999302	0.416625	2.39857	0.0164594	0.07191
TCONS_00000850	87.5987	-0.886366	0.369721	-2.39739	0.0165123	0.0719646
TCONS_00004311	158.516	-0.871114	0.363375	-2.39729	0.016517	0.0719646
TCONS_00004409	396.18	-0.670363	0.279658	-2.39708	0.0165261	0.0719646
TCONS_00004555	112.023	1.10469	0.460662	2.39805	0.0164827	0.0719646
TCONS_00009177	151.369	0.850648	0.354875	2.39704	0.0165283	0.0719646
TCONS_00016672	72.1678	-0.884071	0.368818	-2.39704	0.0165281	0.0719646
TCONS_00010682	161.526	-0.853249	0.356066	-2.39633	0.0165604	0.072063
TCONS_00008340	73.3445	1.22388	0.510922	2.39542	0.0166011	0.0721952
TCONS_00009495	80.9518	1.03821	0.433447	2.39524	0.0166096	0.0721952
TCONS_00005766	137.794	1.02921	0.429827	2.39448	0.0166437	0.0723025
TCONS_00007175	19.9795	1.31707	0.550154	2.39401	0.0166652	0.0723548
TCONS_00013465	6.46193	1.81477	0.758228	2.39344	0.0166913	0.0724269
TCONS_00008792	353.503	-0.691311	0.288885	-2.39303	0.0167098	0.0724661
TCONS_00006604	17.8357	1.56291	0.653336	2.39219	0.016748	0.0725905
TCONS_00007941	58.7748	-1.16666	0.487869	-2.39134	0.0167872	0.0726958
TCONS_00016236	29.0859	1.1151	0.466327	2.39125	0.0167913	0.0726958
TCONS_00000465	6.71958	1.71634	0.71791	2.39074	0.0168144	0.0727547
TCONS_00014856	897.505	-0.613556	0.256715	-2.39003	0.0168471	0.0728548
TCONS_00002867	334.093	-0.705697	0.295422	-2.38877	0.0169048	0.0729805
TCONS_00009823	293.496	0.903759	0.378275	2.38916	0.0168872	0.0729805
TCONS_00014064	63.578	-0.950897	0.398068	-2.38878	0.0169043	0.0729805
TCONS_00016254	56.1334	-1.20103	0.502972	-2.38787	0.0169461	0.0731177
TCONS_00002776	97.4393	0.756426	0.31684	2.38741	0.0169677	0.0731282
TCONS_00013139	176.844	-0.689567	0.288818	-2.38755	0.016961	0.0731282
TCONS_00010191	119.762	-0.785569	0.329094	-2.38707	0.0169835	0.0731552
TCONS_00015512	41.8082	-1.12357	0.470786	-2.38659	0.0170055	0.0732089
TCONS_00006017	14.4377	1.30813	0.548271	2.38592	0.0170365	0.0733012
TCONS_00001060	82.6133	0.939218	0.393797	2.38503	0.0170778	0.0733981
TCONS_00015944	27.9122	-1.07895	0.452385	-2.38502	0.0170783	0.0733981
TCONS_00014670	19.0642	-1.27457	0.5345	-2.3846	0.0170977	0.0734404
TCONS_00015511	144.371	-0.798935	0.335194	-2.3835	0.0171488	0.0736187
TCONS_00000422	611.502	-0.689617	0.289471	-2.38234	0.0172031	0.0738102
TCONS_00014107	31.8097	1.18241	0.496611	2.38095	0.0172679	0.0740468
TCONS_00013105	194.869	-0.752394	0.31613	-2.38002	0.0173119	0.0741938
TCONS_00016806	163.499	-0.852561	0.358253	-2.37978	0.0173232	0.0742007
TCONS_00014060	205.686	0.999611	0.420159	2.37912	0.0173538	0.0742733
TCONS_00014111	14.5814	1.65433	0.695387	2.379	0.0173596	0.0742733
TCONS_00000287	241.717	-0.698932	0.293983	-2.37746	0.0174323	0.0744146
TCONS_00001589	85.9681	-0.772447	0.32488	-2.37764	0.0174238	0.0744146
TCONS_00005806	32.3917	1.28561	0.54071	2.37764	0.0174238	0.0744146
TCONS_00012441	19.2958	-1.18686	0.499251	-2.37728	0.0174409	0.0744146
TCONS_00015411	67.333	1.04098	0.437887	2.37727	0.0174412	0.0744146
TCONS_00003630	230.59	-0.792329	0.333535	-2.37555	0.0175227	0.0747207
TCONS_00009833	114.372	1.4101	0.593777	2.3748	0.0175586	0.0748318
TCONS_00016376	5.99076	-1.89644	0.799424	-2.37226	0.0176797	0.0753062
TCONS_00004272	312.381	-0.721681	0.304329	-2.37139	0.0177214	0.0754418
TCONS_00006929	38.093	-1.0166	0.428917	-2.37016	0.0177803	0.0756503
TCONS_00012505	70.4933	-0.810327	0.341962	-2.36964	0.0178055	0.0757003
TCONS_00012747	30.7354	-1.07863	0.455213	-2.36951	0.0178118	0.0757003
TCONS_00009281	82.0141	-0.933017	0.39381	-2.36921	0.0178264	0.07572
TCONS_00004618	52.3832	-0.958144	0.4046	-2.36813	0.0178784	0.0758567
TCONS_00010384	786.073	-0.689229	0.291044	-2.36813	0.0178784	0.0758567
TCONS_00004878	11.141	1.48413	0.626844	2.36762	0.017903	0.0759189
TCONS_00002852	7.67759	1.56858	0.662823	2.36652	0.0179564	0.0760612
TCONS_00003451	29.7504	-1.18659	0.501366	-2.36672	0.0179466	0.0760612
TCONS_00010681	337.428	0.770929	0.325881	2.36567	0.0179974	0.0761925
TCONS_00008596	16.7253	-1.21891	0.515438	-2.36479	0.0180401	0.076331
TCONS_00013218	32.0978	1.23684	0.523195	2.36401	0.0180783	0.0764506
TCONS_00004093	240.501	1.09099	0.461663	2.36317	0.0181192	0.0765812
TCONS_00000621	452.384	-0.605947	0.25649	-2.36246	0.018154	0.0766564
TCONS_00003172	149.257	0.688884	0.291603	2.3624	0.0181571	0.0766564
TCONS_00001635	502.679	-0.604188	0.25581	-2.36187	0.0181832	0.0766838
TCONS_00006946	32.6596	1.17717	0.498453	2.36165	0.0181936	0.0766838
TCONS_00014077	24.1881	1.40196	0.593634	2.36166	0.0181932	0.0766838
TCONS_00015083	235.335	-0.747193	0.316421	-2.36139	0.0182067	0.0766967
TCONS_00009189	4.46168	-1.79122	0.758676	-2.36098	0.0182266	0.0767383
TCONS_00003276	31.6135	1.21314	0.513971	2.36033	0.0182588	0.0767697
TCONS_00005526	54.0656	-0.874506	0.370519	-2.36022	0.0182642	0.0767697
TCONS_00007132	57.603	-0.912042	0.38641	-2.36029	0.0182604	0.0767697
TCONS_00000251	8.03673	1.65412	0.701208	2.35896	0.0183262	0.0768753
TCONS_00005227	13.9556	1.51944	0.64405	2.3592	0.0183141	0.0768753
TCONS_00005860	6.47428	1.70589	0.723175	2.35889	0.0183295	0.0768753
TCONS_00007353	77.0098	0.952432	0.40376	2.35891	0.0183289	0.0768753
TCONS_00011844	164.551	-0.769816	0.326529	-2.35758	0.0183947	0.0771067
TCONS_00016010	113.03	0.800213	0.339535	2.35679	0.0184338	0.0772283
TCONS_00001307	138.242	-0.71625	0.304001	-2.35608	0.018469	0.0772909
TCONS_00016829	111.257	-0.860571	0.365253	-2.35609	0.0184682	0.0772909
TCONS_00009932	233.992	-0.735242	0.312421	-2.35337	0.0186042	0.0778144
TCONS_00011415	14.5264	1.46298	0.621743	2.35304	0.0186209	0.0778413
TCONS_00011623	140.5	-0.714343	0.304164	-2.34854	0.018847	0.0787005
TCONS_00016960	12.7533	1.45459	0.61934	2.34861	0.0188434	0.0787005
TCONS_00000974	10.9894	1.43065	0.609252	2.34821	0.018864	0.0787287
TCONS_00014688	97.3428	-0.94734	0.403615	-2.34714	0.0189184	0.0789125
TCONS_00008317	235.457	-0.726591	0.309604	-2.34684	0.0189335	0.0789325
TCONS_00014765	65.444	0.932626	0.397509	2.34618	0.0189671	0.0790297
TCONS_00005195	7.06104	1.75566	0.748622	2.34518	0.0190178	0.0791978
TCONS_00009505	55.2203	0.824594	0.351652	2.34492	0.0190314	0.0792111
TCONS_00005185	116.081	0.862176	0.36778	2.34427	0.0190642	0.0793045
TCONS_00011927	63.0825	-0.935304	0.399092	-2.34358	0.0190997	0.0794089
TCONS_00007146	331.201	-0.768025	0.327746	-2.34336	0.0191111	0.0794134
TCONS_00002845	121.892	-0.722083	0.308228	-2.34269	0.0191451	0.0794745
TCONS_00009708	28.203	1.32982	0.567696	2.34249	0.0191554	0.0794745
TCONS_00010762	66.2217	0.958251	0.409079	2.34246	0.019157	0.0794745
TCONS_00007098	207.76	-0.83798	0.357789	-2.34211	0.0191752	0.079507
TCONS_00005311	16.6617	-1.39824	0.597128	-2.3416	0.0192012	0.0795715
TCONS_00010086	173.196	-0.73752	0.315065	-2.34085	0.0192397	0.0796882
TCONS_00000039	202.037	0.808101	0.34537	2.33981	0.0192934	0.0798671
TCONS_00001455	1264.61	-0.621415	0.265691	-2.33886	0.0193425	0.0800152
TCONS_00001910	202.045	-0.75915	0.324601	-2.33872	0.0193501	0.0800152
TCONS_00001619	401.867	1.00197	0.428515	2.33825	0.0193745	0.0800411
TCONS_00009515	23.202	-1.09106	0.466664	-2.33799	0.0193877	0.0800411
TCONS_00014115	29.2826	1.1813	0.505239	2.3381	0.0193823	0.0800411
TCONS_00012382	53.5126	-0.868339	0.371483	-2.3375	0.0194134	0.0801039
TCONS_00006521	366.051	-0.699421	0.299248	-2.33726	0.0194258	0.0801116
TCONS_00001311	71.2052	1.19401	0.511367	2.33493	0.0195468	0.0805674
TCONS_00010473	80.3765	1.10724	0.474269	2.33463	0.0195627	0.0805897
TCONS_00010258	311.021	1.03137	0.441883	2.33404	0.0195934	0.0806724
TCONS_00006725	25.8056	1.04674	0.44891	2.33173	0.0197146	0.081128
TCONS_00001392	6.25812	1.69108	0.725376	2.33131	0.019737	0.0811326
TCONS_00010047	426.96	-0.7174	0.307704	-2.33146	0.0197292	0.0811326
TCONS_00014439	69.9747	-0.952643	0.408677	-2.33104	0.0197512	0.0811474
TCONS_00004733	122.686	0.890843	0.382282	2.33033	0.0197888	0.0812584
TCONS_00014543	76.6753	1.17007	0.502334	2.32927	0.019845	0.0814453
TCONS_00007387	5.54803	1.85713	0.797828	2.32773	0.0199266	0.0817364
TCONS_00002750	4.78783	1.86672	0.802582	2.32589	0.0200245	0.0818325
TCONS_00006240	221.609	-0.659839	0.283673	-2.32605	0.0200159	0.0818325
TCONS_00008149	100.557	0.883409	0.379791	2.32604	0.0200165	0.0818325
TCONS_00008461	101.357	-0.850117	0.365535	-2.32568	0.0200356	0.0818325
TCONS_00009016	4.56098	-1.80763	0.776834	-2.32692	0.0199693	0.0818325
TCONS_00009103	160.606	0.878699	0.377817	2.32573	0.020033	0.0818325
TCONS_00011303	108.499	-0.835249	0.359068	-2.32616	0.02001	0.0818325
TCONS_00016380	37.5957	-1.00438	0.431743	-2.32634	0.0200003	0.0818325
TCONS_00013634	6.63816	1.72895	0.743589	2.32514	0.0200645	0.0819068
TCONS_00005882	189.613	-0.864011	0.371708	-2.32444	0.0201021	0.0819889
TCONS_00016618	18.3815	-1.17701	0.506378	-2.32436	0.020106	0.0819889
TCONS_00002567	9.66071	-1.46812	0.631709	-2.32404	0.0201233	0.0820155
TCONS_00005077	2133.43	0.629114	0.270731	2.32376	0.0201384	0.0820333
TCONS_00006867	20.448	1.26562	0.544978	2.32234	0.0202145	0.0822555
TCONS_00013837	61.5217	-0.969803	0.417569	-2.3225	0.0202061	0.0822555
TCONS_00014168	11.5079	1.52673	0.657466	2.32214	0.0202252	0.0822555
TCONS_00003148	379.601	1.34047	0.577366	2.32171	0.0202487	0.0823073
TCONS_00010764	5.6546	1.85001	0.797235	2.32053	0.0203123	0.082522
TCONS_00007587	72.2336	-0.818987	0.353084	-2.31952	0.0203667	0.0826992
TCONS_00004825	86.1135	1.31382	0.566606	2.31875	0.0204083	0.0828242
TCONS_00009392	39.4049	1.16389	0.502058	2.31824	0.0204364	0.0828944
TCONS_00008338	145.011	-0.827361	0.357059	-2.31716	0.0204952	0.0830885
TCONS_00005424	613.605	0.661562	0.28562	2.31623	0.0205456	0.0832049
TCONS_00011294	41.1639	1.18751	0.512682	2.31627	0.0205436	0.0832049
TCONS_00006241	99.9434	0.938957	0.405722	2.31429	0.0206519	0.0835912
TCONS_00000694	39.7725	1.30539	0.564302	2.31329	0.0207066	0.0836794
TCONS_00008528	67.8939	-0.897019	0.387751	-2.31339	0.0207013	0.0836794
TCONS_00008582	108.37	0.792471	0.342545	2.31348	0.0206964	0.0836794
TCONS_00015756	31.8369	0.969478	0.419532	2.31086	0.0208407	0.0841769
TCONS_00007434	10.549	-1.40115	0.606484	-2.31029	0.0208722	0.0842599
TCONS_00010462	49.7159	-0.918167	0.397509	-2.3098	0.0208991	0.0843149
TCONS_00011527	440.864	-0.702491	0.304156	-2.30964	0.0209079	0.0843149
TCONS_00001265	86.9306	1.00504	0.435432	2.30813	0.0209918	0.0846088
TCONS_00002387	78.5878	0.847372	0.367368	2.3066	0.0210771	0.0849078
TCONS_00011748	82.1487	-0.820335	0.355788	-2.30569	0.0211282	0.0850689
TCONS_00016016	15.3005	1.3828	0.6	2.30467	0.021185	0.0852526
TCONS_00002096	53.794	-0.970225	0.421215	-2.3034	0.0212565	0.0854955
TCONS_00001436	5.63918	1.80451	0.783738	2.30245	0.0213101	0.0856658
TCONS_00003174	11.6204	-1.37312	0.596441	-2.3022	0.021324	0.0856768
TCONS_00010004	105.398	1.08861	0.473001	2.30149	0.0213642	0.0857032
TCONS_00014944	7.61982	1.56459	0.679763	2.30167	0.0213538	0.0857032
TCONS_00016397	25.4767	-1.12868	0.49034	-2.30182	0.0213452	0.0857032
TCONS_00016504	39.116	-0.938687	0.408058	-2.30037	0.021427	0.0859101
TCONS_00000150	10.6348	-1.40112	0.609185	-2.29999	0.0214489	0.0859529
TCONS_00009538	216.374	-0.904374	0.39328	-2.29957	0.0214726	0.0860027
TCONS_00006284	105.163	0.954253	0.415208	2.29826	0.0215473	0.0862567
TCONS_00000558	201.995	-0.814157	0.354439	-2.29703	0.021617	0.0864905
TCONS_00000044	11.7307	1.7448	0.759875	2.29616	0.0216666	0.0865108
TCONS_00004687	25.4338	1.19569	0.520737	2.29615	0.0216675	0.0865108
TCONS_00008837	504.313	-0.607143	0.264372	-2.29655	0.0216446	0.0865108
TCONS_00011775	284.034	1.00099	0.435914	2.2963	0.0216589	0.0865108
TCONS_00013951	320.222	-0.653444	0.284607	-2.29595	0.0216786	0.0865108
TCONS_00001044	93.0841	1.03579	0.451351	2.29487	0.0217405	0.0867029
TCONS_00008541	76.7032	-0.794775	0.34635	-2.29472	0.0217494	0.0867029
TCONS_00003957	30.7588	1.31838	0.574625	2.29433	0.0217715	0.0867459
TCONS_00006696	30.4585	1.13955	0.496723	2.29413	0.0217829	0.0867459
TCONS_00000563	81.3332	-0.754369	0.328999	-2.29292	0.0218526	0.0867772
TCONS_00000658	57.9826	0.82393	0.359436	2.29229	0.0218892	0.0867772
TCONS_00003912	17.0844	1.47739	0.64452	2.29223	0.0218925	0.0867772
TCONS_00008466	95.3917	-0.790384	0.34476	-2.29256	0.0218731	0.0867772
TCONS_00009173	428.797	-0.741191	0.32335	-2.29222	0.0218928	0.0867772
TCONS_00009510	66.2651	0.981143	0.427954	2.29263	0.0218691	0.0867772
TCONS_00012266	32.2539	-1.01715	0.443486	-2.29354	0.0218172	0.0867772
TCONS_00012992	33.0293	1.4011	0.61121	2.29234	0.021886	0.0867772
TCONS_00016521	633.847	-0.586287	0.255706	-2.29282	0.0218584	0.0867772
TCONS_00007222	37.0882	1.03019	0.449559	2.29156	0.0219311	0.0868469
TCONS_00012444	56.9638	-0.987115	0.430768	-2.29152	0.0219331	0.0868469
TCONS_00003306	160.19	-0.733486	0.320117	-2.29131	0.0219456	0.0868514
TCONS_00001836	129.413	1.00395	0.438521	2.28941	0.0220557	0.0872036
TCONS_00004031	129.541	-0.865333	0.377977	-2.28938	0.0220574	0.0872036
TCONS_00000855	169.866	-0.689274	0.301174	-2.28862	0.0221013	0.087332
TCONS_00003625	43.3126	-1.13987	0.498301	-2.28751	0.022166	0.0875425
TCONS_00013795	187.688	-0.646607	0.282722	-2.28707	0.0221916	0.0875983
TCONS_00001344	62.408	-0.889221	0.388958	-2.28616	0.0222447	0.0876407
TCONS_00005884	449.829	-0.600319	0.26261	-2.28597	0.0222557	0.0876407
TCONS_00008675	193.464	-0.637249	0.278773	-2.28591	0.0222596	0.0876407
TCONS_00013814	140.16	0.860584	0.376432	2.28616	0.022245	0.0876407
TCONS_00014405	142.648	0.861809	0.37689	2.28663	0.0222173	0.0876407
TCONS_00009273	43.627	-1.0297	0.450648	-2.28493	0.0223168	0.0878207
TCONS_00000924	31.2582	-1.17036	0.512486	-2.28368	0.0223902	0.0880641
TCONS_00006975	131.101	-0.715778	0.313565	-2.28271	0.0224474	0.0881984
TCONS_00012129	17.433	1.48027	0.64842	2.28288	0.0224374	0.0881984
TCONS_00001684	146.35	-0.689222	0.302005	-2.28215	0.0224803	0.0882824
TCONS_00001046	27.5419	1.11045	0.486914	2.28058	0.0225732	0.0885096
TCONS_00003015	42.7489	-0.874186	0.383384	-2.28018	0.0225968	0.0885096
TCONS_00004097	54.6895	-0.927014	0.406563	-2.28013	0.0226003	0.0885096
TCONS_00004862	281.539	0.866367	0.379879	2.28064	0.0225699	0.0885096
TCONS_00005895	38.945	-0.925852	0.405904	-2.28096	0.0225507	0.0885096
TCONS_00009755	9.37637	1.61346	0.707655	2.28	0.0226075	0.0885096
TCONS_00016409	77.4634	-0.91224	0.400177	-2.27959	0.0226318	0.0885591
TCONS_00005101	80.2782	-0.967001	0.424304	-2.27903	0.0226653	0.0885996
TCONS_00015615	27.0436	1.20945	0.530655	2.27917	0.0226572	0.0885996
TCONS_00000871	15.2471	1.29144	0.566888	2.27812	0.0227195	0.0887224
TCONS_00009113	18.1022	1.37945	0.605523	2.27811	0.0227199	0.0887224
TCONS_00007579	47.9795	-1.04477	0.459041	-2.27597	0.0228475	0.0891298
TCONS_00011839	38.1058	1.06819	0.469307	2.27611	0.0228396	0.0891298
TCONS_00005745	110.656	-0.813183	0.35747	-2.27483	0.0229161	0.0893516
TCONS_00002918	39.3656	1.32416	0.582217	2.27433	0.0229459	0.089377
TCONS_00004306	46.4154	-0.9544	0.419618	-2.27445	0.0229392	0.089377
TCONS_00011963	196.147	0.983198	0.432417	2.27372	0.0229826	0.0894742
TCONS_00003803	37.4804	1.2628	0.555462	2.27343	0.0230003	0.0894975
TCONS_00014199	395.438	-0.68345	0.300659	-2.27317	0.0230157	0.0895121
TCONS_00003320	8.76409	-1.5117	0.665162	-2.27268	0.0230452	0.0895473
TCONS_00016126	137.444	-0.793286	0.34906	-2.27263	0.0230482	0.0895473
TCONS_00015651	6.36606	1.60612	0.706909	2.27203	0.0230845	0.0896428
TCONS_00001559	41.0061	-1.00703	0.443282	-2.27176	0.0231009	0.0896608
TCONS_00015098	14.4757	-1.37986	0.607955	-2.26968	0.0232271	0.090105
TCONS_00005444	8.25424	1.50395	0.662807	2.26906	0.0232648	0.0901142
TCONS_00005741	21.9731	1.07731	0.474704	2.26943	0.023242	0.0901142
TCONS_00016175	10.9357	1.52422	0.671742	2.26906	0.0232648	0.0901142
TCONS_00004516	66.7386	-0.891024	0.392971	-2.2674	0.0233656	0.090459
TCONS_00003100	595.207	-0.594227	0.26218	-2.26648	0.0234217	0.0906303
TCONS_00014080	33.6225	1.01912	0.449703	2.2662	0.0234393	0.0906525
TCONS_00011627	180.63	-0.761938	0.33646	-2.26457	0.023539	0.0909922
TCONS_00013096	215.773	0.704672	0.31129	2.26372	0.0235916	0.0911494
TCONS_00001533	134.546	1.04568	0.46217	2.26255	0.0236632	0.0913797
TCONS_00010667	53.4	-0.90056	0.398094	-2.26218	0.0236862	0.0914227
TCONS_00000052	41.7702	-0.936474	0.414215	-2.26084	0.0237692	0.0916505
TCONS_00013151	13.7725	1.31918	0.583454	2.26098	0.0237603	0.0916505
TCONS_00011642	31.9574	1.14204	0.505331	2.25998	0.0238228	0.0918108
TCONS_00000045	77.105	-0.816673	0.361577	-2.25864	0.0239057	0.0918678
TCONS_00001488	45.7082	-0.994927	0.440482	-2.25873	0.0239004	0.0918678
TCONS_00004599	146.636	-0.815101	0.360739	-2.25953	0.0238503	0.0918678
TCONS_00008699	15.0905	-1.24971	0.553317	-2.25858	0.0239096	0.0918678
TCONS_00009134	731.585	-0.648319	0.286952	-2.25933	0.0238629	0.0918678
TCONS_00012963	32.7946	-0.97703	0.432575	-2.25864	0.023906	0.0918678
TCONS_00013919	28.7637	1.54163	0.682912	2.25743	0.0239813	0.0920967
TCONS_00010725	143.807	-0.809928	0.358836	-2.2571	0.024002	0.0921299
TCONS_00004641	133.36	-0.842087	0.373227	-2.25623	0.024056	0.0922897
TCONS_00013810	26.54	-1.06887	0.47378	-2.25605	0.0240677	0.0922897
TCONS_00004861	70.2457	0.978597	0.4339	2.25535	0.0241111	0.0924099
TCONS_00000799	42.7975	-0.888079	0.393834	-2.25496	0.0241361	0.0924591
TCONS_00005490	163.563	-0.658969	0.292279	-2.25459	0.024159	0.0925008
TCONS_00014700	59.7719	0.91553	0.406145	2.25419	0.0241841	0.0925042
[truncated: 15,009 more rows]

## Sheet: FDR
GeneID	Base mean	log2(FC)	StdErr	Wald-Stats	P-value	P-adj
TCONS_00005876	700.802	2.97658	0.420789	7.07382	1.50727e-12	1.15306e-08
TCONS_00013193	130.016	2.20904	0.335495	6.58442	4.56653e-11	1.16446e-07
TCONS_00015533	598.624	2.83643	0.429246	6.60793	3.89724e-11	1.16446e-07
TCONS_00001907	36.0132	2.97553	0.47667	6.24232	4.3113e-10	8.24537e-07
TCONS_00011188	70.2646	2.48125	0.404603	6.13255	8.64821e-10	1.14782e-06
TCONS_00012184	101.932	2.46728	0.405789	6.0802	1.20033e-09	1.14782e-06
TCONS_00013739	45.5244	2.52619	0.412554	6.12329	9.1662e-10	1.14782e-06
TCONS_00014994	65.1419	2.88101	0.472919	6.09198	1.1152e-09	1.14782e-06
TCONS_00014446	73.8398	2.63269	0.440185	5.98088	2.2193e-09	1.8864e-06
TCONS_00008915	96.5791	2.0441	0.343053	5.95855	2.54484e-09	1.94681e-06
TCONS_00015322	327.786	2.05478	0.351	5.85408	4.79651e-09	3.33576e-06
TCONS_00016415	80.6588	2.46795	0.423578	5.82643	5.66244e-09	3.60981e-06
TCONS_00000911	131.494	2.97326	0.517818	5.7419	9.36219e-09	5.11577e-06
TCONS_00006966	389.42	2.34104	0.407018	5.75167	8.8364e-09	5.11577e-06
TCONS_00013802	225.281	2.56117	0.447776	5.71975	1.06679e-08	5.44064e-06
TCONS_00014002	217.023	2.41434	0.425396	5.67552	1.3827e-08	6.61102e-06
TCONS_00010710	476.081	2.7209	0.481328	5.65291	1.57755e-08	7.09897e-06
TCONS_00007744	79.2407	2.55216	0.453078	5.63293	1.77174e-08	7.17097e-06
TCONS_00014381	80.7913	3.3651	0.597493	5.63203	1.78102e-08	7.17097e-06
TCONS_00002363	106.43	2.50121	0.446983	5.59576	2.19657e-08	8.40187e-06
TCONS_00004497	43.7231	2.64146	0.476719	5.54092	3.00887e-08	1.09609e-05
TCONS_00009114	92.4713	2.33992	0.426031	5.49237	3.96575e-08	1.379e-05
TCONS_00010671	1060.44	1.74827	0.319009	5.4803	4.24594e-08	1.41224e-05
TCONS_00001010	1337.88	2.1045	0.386449	5.44573	5.15927e-08	1.57874e-05
TCONS_00013603	153.474	2.353	0.431954	5.44734	5.11301e-08	1.57874e-05
TCONS_00004871	70.4088	2.586	0.480198	5.38529	7.23276e-08	2.1281e-05
TCONS_00004388	14.7058	3.52229	0.655249	5.37549	7.63744e-08	2.16394e-05
TCONS_00016406	331.409	1.72319	0.321524	5.35943	8.34829e-08	2.22687e-05
TCONS_00016752	226.547	2.12114	0.395926	5.35742	8.44174e-08	2.22687e-05
TCONS_00014302	60.9912	2.27249	0.428977	5.29745	1.17431e-07	2.99448e-05
TCONS_00016914	80.1069	2.64867	0.503795	5.25745	1.4607e-07	3.60463e-05
TCONS_00001513	533.52	2.44437	0.467687	5.22651	1.72738e-07	4.12951e-05
TCONS_00004174	2059.96	2.38459	0.459598	5.18842	2.12086e-07	4.91654e-05
TCONS_00012024	39.7367	2.67732	0.518599	5.1626	2.43548e-07	5.47984e-05
TCONS_00007713	1045.67	2.42788	0.472702	5.13617	2.80389e-07	6.12851e-05
TCONS_00001788	254.605	2.0651	0.403861	5.11338	3.16442e-07	6.72439e-05
TCONS_00001365	554.628	2.24204	0.43936	5.10296	3.34376e-07	6.91345e-05
TCONS_00008527	37.766	2.56182	0.503006	5.09302	3.52396e-07	7.09429e-05
TCONS_00007704	326.503	2.452	0.48655	5.03956	4.66596e-07	9.15246e-05
TCONS_00003892	737.618	2.47909	0.497219	4.98591	6.16696e-07	0.000105608
TCONS_00008775	900.854	1.89417	0.378366	5.00619	5.55179e-07	0.000105608
TCONS_00009176	286.667	2.51385	0.504333	4.9845	6.21226e-07	0.000105608
TCONS_00014447	22.3778	2.70156	0.540712	4.99629	5.84434e-07	0.000105608
TCONS_00016849	140.6	2.40042	0.48117	4.98871	6.07838e-07	0.000105608
TCONS_00016929	21.3684	3.06216	0.612854	4.99657	5.83602e-07	0.000105608
TCONS_00010071	32.0946	2.6957	0.541322	4.97985	6.36341e-07	0.000105826
TCONS_00001364	162.714	2.34179	0.472759	4.95346	7.29045e-07	0.000115204
TCONS_00010454	435.021	2.21954	0.448291	4.95111	7.37909e-07	0.000115204
TCONS_00016622	1919.89	2.16092	0.436106	4.95504	7.23156e-07	0.000115204
TCONS_00016883	93.4301	2.24701	0.454821	4.94044	7.79472e-07	0.000119259
TCONS_00003383	771.453	2.42878	0.492627	4.93027	8.2117e-07	0.000123175
TCONS_00012425	22.8403	2.66559	0.542248	4.91582	8.84133e-07	0.00013007
TCONS_00010428	229.518	1.72657	0.351506	4.91192	9.01898e-07	0.00013018
TCONS_00003759	53.0058	2.56592	0.523707	4.89954	9.60625e-07	0.000136088
TCONS_00007126	184.966	1.95072	0.402288	4.84907	1.24042e-06	0.000172531
TCONS_00008785	176.1	2.17008	0.448015	4.84377	1.27398e-06	0.000174034
TCONS_00003351	1833.58	2.23587	0.462839	4.83077	1.36004e-06	0.000179384
TCONS_00011335	146.682	1.82214	0.377137	4.83152	1.35496e-06	0.000179384
TCONS_00002546	398.002	2.13058	0.442378	4.8162	1.46316e-06	0.000185503
TCONS_00009614	7.18528	3.71127	0.770929	4.81403	1.47918e-06	0.000185503
TCONS_00015549	284.652	2.56906	0.533516	4.81534	1.46949e-06	0.000185503
TCONS_00000376	43.7808	2.46682	0.512901	4.80956	1.51266e-06	0.000186642
TCONS_00003648	781.457	1.78817	0.372101	4.8056	1.54286e-06	0.000187347
TCONS_00013819	44.0171	-2.19754	0.458253	-4.79546	1.62299e-06	0.000193998
TCONS_00000945	338.768	2.3943	0.50001	4.7885	1.68032e-06	0.000195466
TCONS_00005493	818.946	1.48422	0.310122	4.78594	1.70192e-06	0.000195466
TCONS_00005583	2699.88	1.74814	0.365445	4.78358	1.72199e-06	0.000195466
TCONS_00010070	81.5457	2.50587	0.524044	4.78178	1.73748e-06	0.000195466
TCONS_00011186	38.7335	2.48286	0.522351	4.75323	2.00191e-06	0.000213515
TCONS_00011266	69.3123	2.3079	0.485252	4.75609	1.97379e-06	0.000213515
TCONS_00012127	160.381	2.4581	0.517226	4.75246	2.00955e-06	0.000213515
TCONS_00014818	104.977	2.06925	0.435094	4.75588	1.97583e-06	0.000213515
TCONS_00001700	145.771	2.29382	0.485112	4.72843	2.26265e-06	0.000213695
TCONS_00001927	775.486	2.41181	0.509604	4.73271	2.21542e-06	0.000213695
TCONS_00002510	194.613	1.61358	0.340225	4.74269	2.10904e-06	0.000213695
TCONS_00003508	167.579	2.55654	0.539234	4.74106	2.12601e-06	0.000213695
TCONS_00004764	70.3285	1.64423	0.346671	4.74292	2.10661e-06	0.000213695
TCONS_00009540	12.6715	3.13089	0.662114	4.72862	2.26051e-06	0.000213695
TCONS_00011397	48.0846	2.13148	0.450423	4.73217	2.22137e-06	0.000213695
TCONS_00014969	65.8124	1.97083	0.416103	4.7364	2.17546e-06	0.000213695
TCONS_00016757	16.6285	2.9235	0.616651	4.74093	2.12735e-06	0.000213695
TCONS_00009280	894.025	1.76375	0.373496	4.72226	2.33233e-06	0.000217589
TCONS_00008200	362.059	2.13557	0.452551	4.71896	2.37058e-06	0.000218493
TCONS_00007185	72.5267	1.91069	0.405632	4.7104	2.47227e-06	0.000225153
TCONS_00007854	100.199	1.50811	0.320717	4.70232	2.57225e-06	0.000231502
TCONS_00001357	355.198	1.70207	0.362822	4.6912	2.71609e-06	0.000236114
TCONS_00007064	50.8756	2.0594	0.43863	4.69507	2.66516e-06	0.000236114
TCONS_00013242	49.5376	-2.06339	0.439786	-4.69181	2.70794e-06	0.000236114
TCONS_00008500	248.322	2.24463	0.47908	4.6853	2.7955e-06	0.000237617
TCONS_00015551	1502.71	2.38568	0.509108	4.68599	2.78607e-06	0.000237617
TCONS_00014382	238.721	2.3556	0.504284	4.67118	2.99478e-06	0.000251759
TCONS_00014367	1548.28	-1.25171	0.268587	-4.66034	3.15692e-06	0.000262505
TCONS_00006069	104.56	1.74618	0.376678	4.63575	3.55647e-06	0.000289436
TCONS_00013162	8740.54	2.38942	0.515295	4.63699	3.53527e-06	0.000289436
TCONS_00016037	436.32	1.97121	0.426314	4.62385	3.76673e-06	0.000303321
TCONS_00016746	168.771	2.33704	0.506604	4.61315	3.96608e-06	0.000316047
TCONS_00003851	2243.66	2.38745	0.518921	4.6008	4.20864e-06	0.000331919
TCONS_00005295	11224.3	2.33598	0.5091	4.58845	4.46546e-06	0.000337031
TCONS_00005375	57.8382	1.7866	0.389547	4.58635	4.51068e-06	0.000337031
TCONS_00007059	154.351	1.52644	0.332518	4.59056	4.42065e-06	0.000337031
TCONS_00009321	2471.19	1.29159	0.281391	4.59002	4.4321e-06	0.000337031
TCONS_00012336	47.8967	-1.94871	0.42501	-4.58509	4.53781e-06	0.000337031
TCONS_00013462	320.909	-1.52496	0.331868	-4.59507	4.32611e-06	0.000337031
TCONS_00014837	2814.4	1.21327	0.264781	4.58218	4.60146e-06	0.000338473
TCONS_00010736	160.36	1.88729	0.412299	4.57746	4.70646e-06	0.000341874
TCONS_00012717	32.7297	2.66354	0.582053	4.57611	4.73708e-06	0.000341874
TCONS_00005037	5454.42	2.35444	0.51503	4.57146	4.84344e-06	0.000343077
TCONS_00010250	279.826	1.6923	0.370073	4.57288	4.81056e-06	0.000343077
TCONS_00006206	1105.83	2.31083	0.507719	4.5514	5.32908e-06	0.000374013
TCONS_00003193	99.7251	1.56784	0.345848	4.53331	5.80655e-06	0.0004014
TCONS_00014846	214.216	1.587	0.350125	4.53267	5.82423e-06	0.0004014
TCONS_00010208	560.18	1.89866	0.419197	4.52926	5.91895e-06	0.000404286
TCONS_00000263	956.062	1.95846	0.434381	4.50863	6.52473e-06	0.000437059
TCONS_00000570	203.039	1.86629	0.414041	4.50749	6.55976e-06	0.000437059
TCONS_00005455	153.526	1.63992	0.364144	4.5035	6.68443e-06	0.000437059
TCONS_00010722	119.446	1.97251	0.437849	4.50501	6.63689e-06	0.000437059
TCONS_00014226	530.751	-1.45693	0.323382	-4.5053	6.62806e-06	0.000437059
TCONS_00006564	618.781	1.46923	0.326971	4.49346	7.00751e-06	0.000452434
TCONS_00009739	2057.64	2.37993	0.529752	4.49254	7.03787e-06	0.000452434
TCONS_00003931	207.814	1.8926	0.422779	4.47657	7.58521e-06	0.000483557
TCONS_00004228	118.799	2.1411	0.478731	4.47244	7.73306e-06	0.000485137
TCONS_00015383	63.6778	2.25657	0.504561	4.47234	7.73683e-06	0.000485137
TCONS_00016794	28.8013	2.36337	0.528696	4.4702	7.81476e-06	0.00048604
TCONS_00011426	5521.21	2.34797	0.526213	4.46202	8.11906e-06	0.000500894
TCONS_00003331	68.1764	1.89262	0.425274	4.45035	8.57321e-06	0.000518079
TCONS_00007642	48.9491	1.6852	0.378725	4.44966	8.6008e-06	0.000518079
TCONS_00011350	1012.26	2.27717	0.511492	4.45202	8.50672e-06	0.000518079
TCONS_00003321	678.904	1.47742	0.332169	4.44781	8.67492e-06	0.000518462
TCONS_00009431	181.378	2.19725	0.494879	4.43998	8.99679e-06	0.000533531
TCONS_00009647	55.3425	1.9819	0.44834	4.42053	9.84592e-06	0.000579395
TCONS_00011212	55.2204	2.05622	0.465598	4.41631	1.00402e-05	0.000586193
TCONS_00014070	109.036	1.62127	0.367243	4.41471	1.01147e-05	0.000586193
TCONS_00006477	32.1585	2.52183	0.572379	4.40588	1.05356e-05	0.000597017
TCONS_00009742	20.1181	2.56045	0.581104	4.40619	1.05207e-05	0.000597017
TCONS_00012364	395.904	2.16075	0.490336	4.40667	1.04971e-05	0.000597017
TCONS_00015117	38.0891	2.09834	0.477057	4.3985	1.09e-05	0.000613125
TCONS_00010314	1177.65	1.76139	0.400981	4.3927	1.11952e-05	0.000625132
TCONS_00002731	37.827	2.49852	0.569604	4.38642	1.15233e-05	0.00063879
TCONS_00007285	94.7687	1.78374	0.406944	4.38324	1.16925e-05	0.000643509
TCONS_00009970	191.292	1.66805	0.38107	4.37727	1.20174e-05	0.000656666
TCONS_00005257	618.674	2.10495	0.481536	4.37132	1.23498e-05	0.000670044
TCONS_00016069	325.668	2.22111	0.508303	4.36965	1.24446e-05	0.000670433
TCONS_00002288	1979.99	2.14519	0.491342	4.36598	1.26555e-05	0.000672325
TCONS_00009432	4178.75	2.23954	0.512886	4.36655	1.26224e-05	0.000672325
TCONS_00001784	1049.07	1.52003	0.348694	4.3592	1.3054e-05	0.000688709
TCONS_00002559	166.674	1.79619	0.412814	4.35109	1.35465e-05	0.00070067
TCONS_00003087	761.946	2.31248	0.531485	4.35098	1.3553e-05	0.00070067
TCONS_00014650	786.392	2.05285	0.471817	4.35094	1.35554e-05	0.00070067
TCONS_00006497	132.846	2.22203	0.511396	4.34504	1.39253e-05	0.000703154
TCONS_00010149	218.467	2.14104	0.492838	4.34431	1.39712e-05	0.000703154
TCONS_00010737	32.7386	2.32765	0.535731	4.34481	1.39395e-05	0.000703154
TCONS_00011314	3786.92	2.2434	0.516204	4.34596	1.38669e-05	0.000703154
TCONS_00010606	2065.65	2.20512	0.508801	4.33395	1.46459e-05	0.000732295
TCONS_00010145	10232.5	2.22094	0.513185	4.32775	1.50637e-05	0.000743468
TCONS_00012659	125.295	2.34062	0.540673	4.32909	1.49729e-05	0.000743468
TCONS_00016176	281.983	2.11764	0.489949	4.32217	1.54501e-05	0.00075765
TCONS_00016155	164.749	1.90226	0.441083	4.31271	1.61267e-05	0.00078579
TCONS_00008848	2378.22	2.09158	0.486616	4.29821	1.72183e-05	0.000833669
TCONS_00005525	809.872	1.55696	0.362404	4.29621	1.73742e-05	0.000835927
TCONS_00016941	1071.75	1.96316	0.457496	4.29111	1.77785e-05	0.000850032
TCONS_00011267	773.182	1.81935	0.42435	4.28738	1.80789e-05	0.000855347
TCONS_00011712	10.9972	2.9846	0.696203	4.28696	1.81132e-05	0.000855347
TCONS_00002049	101.149	1.73855	0.405689	4.28543	1.8239e-05	0.000856
TCONS_00009379	799.224	1.36494	0.31873	4.28242	1.84868e-05	0.000857187
TCONS_00014566	90.9205	2.21552	0.517355	4.28241	1.84884e-05	0.000857187
TCONS_00010989	28.0232	2.20704	0.515739	4.27937	1.87426e-05	0.00085857
TCONS_00010999	12.0296	2.87723	0.672223	4.28018	1.86742e-05	0.00085857
TCONS_00008065	8739.98	2.26468	0.529872	4.27401	1.91986e-05	0.000874223
TCONS_00000261	1597.4	2.13695	0.500911	4.26613	1.98891e-05	0.000894417
TCONS_00002925	63.1328	1.78631	0.418666	4.26666	1.98418e-05	0.000894417
TCONS_00004966	1264.84	1.75452	0.411379	4.26497	1.99928e-05	0.000894417
TCONS_00000002	1115.12	1.70853	0.400937	4.26133	2.03214e-05	0.000903832
TCONS_00003486	2770.88	2.22627	0.523247	4.25472	2.09312e-05	0.000908926
TCONS_00003554	1029.1	2.19313	0.515227	4.25663	2.07535e-05	0.000908926
TCONS_00006565	994.705	2.12303	0.499255	4.2524	2.11489e-05	0.000908926
TCONS_00007443	40.6774	1.7739	0.417147	4.25245	2.1144e-05	0.000908926
TCONS_00013020	1579.88	2.26502	0.532545	4.2532	2.10736e-05	0.000908926
TCONS_00014319	91.8732	1.40152	0.329243	4.25678	2.07394e-05	0.000908926
TCONS_00010607	928.975	2.00441	0.472034	4.24633	2.17296e-05	0.000928666
TCONS_00005673	11350	1.35346	0.319285	4.23904	2.2448e-05	0.000943555
TCONS_00006380	88.4547	2.41949	0.570733	4.23927	2.24244e-05	0.000943555
TCONS_00013773	2701.95	2.00661	0.473353	4.23914	2.24374e-05	0.000943555
TCONS_00006736	899.374	2.22588	0.525462	4.23605	2.27491e-05	0.000946311
TCONS_00015956	24.9377	2.25025	0.531229	4.23593	2.2761e-05	0.000946311
TCONS_00013804	1455.48	1.59478	0.376894	4.23139	2.32255e-05	0.000960405
TCONS_00004376	833.079	1.81091	0.429812	4.21326	2.5171e-05	0.00103526
TCONS_00007016	21.8273	2.40513	0.571438	4.2089	2.5662e-05	0.00104422
TCONS_00013135	518.856	2.00162	0.475458	4.20989	2.55496e-05	0.00104422
TCONS_00000172	4593.22	1.85118	0.440928	4.19838	2.6883e-05	0.00105587
TCONS_00006605	8.60248	2.87824	0.685431	4.19917	2.679e-05	0.00105587
TCONS_00008839	25.1709	2.33875	0.556997	4.19885	2.68269e-05	0.00105587
TCONS_00008911	239.778	1.85396	0.44153	4.19895	2.68152e-05	0.00105587
TCONS_00008950	907.287	2.16872	0.516594	4.19812	2.69144e-05	0.00105587
TCONS_00009259	4208.22	2.2224	0.529055	4.2007	2.6609e-05	0.00105587
TCONS_00013477	41.3276	1.66731	0.396888	4.20096	2.65789e-05	0.00105587
TCONS_00008406	3678.5	1.97938	0.472156	4.19223	2.76226e-05	0.00107813
TCONS_00008168	288.826	1.84588	0.440438	4.19101	2.77713e-05	0.00107843
TCONS_00009434	12308.4	2.04277	0.487842	4.18737	2.82208e-05	0.00109035
TCONS_00004098	78.2463	1.39152	0.332442	4.18577	2.84198e-05	0.00109252
TCONS_00003150	5710.78	2.06101	0.493256	4.17838	2.93587e-05	0.00109374
TCONS_00003833	82.2429	1.54719	0.36988	4.18296	2.87743e-05	0.00109374
TCONS_00006221	17.3374	2.41622	0.578755	4.17486	2.98166e-05	0.00109374
TCONS_00006579	130.158	1.8614	0.445248	4.1806	2.90743e-05	0.00109374
TCONS_00008910	39.5788	1.7246	0.412578	4.18006	2.91437e-05	0.00109374
TCONS_00009158	182.106	1.50104	0.359584	4.17437	2.98814e-05	0.00109374
TCONS_00015807	35.792	2.4213	0.579807	4.17604	2.96624e-05	0.00109374
TCONS_00016666	1145.12	-1.03863	0.248253	-4.18375	2.86745e-05	0.00109374
TCONS_00016679	2893.57	2.20927	0.528978	4.17649	2.96043e-05	0.00109374
TCONS_00016739	226.172	1.62184	0.388463	4.17503	2.97946e-05	0.00109374
TCONS_00001566	374.603	1.48296	0.355707	4.16906	3.0586e-05	0.00110893
TCONS_00004573	836.488	1.89773	0.455145	4.1695	3.05269e-05	0.00110893
TCONS_00001141	5102.27	2.15323	0.517498	4.16085	3.17064e-05	0.00114412
TCONS_00004455	3845.91	1.9448	0.468394	4.15206	3.29493e-05	0.00117238
TCONS_00009130	1038.77	1.98272	0.47731	4.15395	3.26782e-05	0.00117238
TCONS_00010639	7260.19	2.12749	0.512376	4.15221	3.29282e-05	0.00117238
TCONS_00005212	31.923	2.06814	0.499188	4.143	3.42788e-05	0.00120844
TCONS_00005235	4142.28	1.9651	0.474221	4.14384	3.41531e-05	0.00120844
TCONS_00003010	146.677	2.2305	0.538759	4.14007	3.47195e-05	0.00121837
TCONS_00005877	40.693	1.98055	0.478951	4.13517	3.54687e-05	0.00123897
TCONS_00007172	364.472	2.24742	0.544228	4.12955	3.63479e-05	0.0012582
TCONS_00009139	2520.26	2.03668	0.493195	4.12956	3.63458e-05	0.0012582
TCONS_00003570	7253.13	2.10054	0.508978	4.12698	3.67554e-05	0.00126208
TCONS_00009734	167.104	2.03772	0.49378	4.12677	3.679e-05	0.00126208
TCONS_00000285	26258.1	1.31833	0.319683	4.12385	3.72591e-05	0.0012681
TCONS_00000574	3261.59	2.13585	0.517957	4.12362	3.72969e-05	0.0012681
TCONS_00001329	22.7003	2.24076	0.543587	4.12217	3.75321e-05	0.00127045
TCONS_00008162	47.853	1.84222	0.447486	4.11682	3.84131e-05	0.00129454
TCONS_00001011	34.4454	2.12112	0.515581	4.11403	3.88813e-05	0.00130457
TCONS_00001325	2354.38	2.12593	0.51708	4.11143	3.93223e-05	0.00131361
TCONS_00003135	336.113	1.50273	0.366229	4.10325	4.07395e-05	0.00134335
TCONS_00005810	79.6337	1.90881	0.465164	4.10351	4.06923e-05	0.00134335
TCONS_00014981	97.2072	-1.46647	0.35723	-4.10512	4.04109e-05	0.00134335
TCONS_00016291	284.906	-1.28528	0.313939	-4.09405	4.23904e-05	0.00139179
TCONS_00002930	1229.11	2.19865	0.538663	4.08168	4.47118e-05	0.0014162
TCONS_00004892	104.904	2.04829	0.502001	4.08026	4.49852e-05	0.0014162
TCONS_00005871	81.0666	2.29133	0.561363	4.08172	4.47033e-05	0.0014162
TCONS_00006478	8.09254	3.06786	0.751208	4.0839	4.42859e-05	0.0014162
TCONS_00006754	2350.47	2.16974	0.531365	4.08333	4.4394e-05	0.0014162
TCONS_00008800	2053.82	2.11709	0.517794	4.08867	4.33863e-05	0.0014162
TCONS_00010843	2050.43	1.91284	0.468204	4.08549	4.39835e-05	0.0014162
TCONS_00011092	85.4516	2.1671	0.530369	4.08603	4.38816e-05	0.0014162
TCONS_00013340	751.504	1.61037	0.394126	4.08592	4.3903e-05	0.0014162
TCONS_00013584	52.3214	1.95887	0.480027	4.08076	4.48887e-05	0.0014162
TCONS_00005759	120.131	1.50134	0.368159	4.07797	4.54314e-05	0.00142438
TCONS_00015819	165.915	2.22542	0.54594	4.07631	4.57563e-05	0.00142872
TCONS_00015262	46.4853	2.08176	0.511866	4.06701	4.76208e-05	0.00148089
TCONS_00011845	2049.76	1.04934	0.258218	4.06378	4.82852e-05	0.00149547
TCONS_00014402	1744.07	2.0385	0.501834	4.0621	4.86333e-05	0.00149863
TCONS_00015870	76.9539	-1.51696	0.373506	-4.0614	4.87789e-05	0.00149863
TCONS_00002390	187.655	1.62966	0.401625	4.05766	4.95677e-05	0.00149879
TCONS_00007817	96.2649	1.49926	0.36947	4.05788	4.95208e-05	0.00149879
TCONS_00013756	10.2362	3.18953	0.785814	4.05889	4.93067e-05	0.00149879
TCONS_00015947	77.1761	1.41592	0.348877	4.05852	4.93851e-05	0.00149879
TCONS_00010616	2923.59	2.09681	0.516973	4.05595	4.99317e-05	0.00150385
TCONS_00010608	77.5301	2.07254	0.511246	4.05389	5.03721e-05	0.00151116
TCONS_00012503	1721.94	1.78495	0.441245	4.04527	5.22639e-05	0.00155938
TCONS_00016747	172.123	2.00488	0.495679	4.04471	5.23869e-05	0.00155938
TCONS_00011021	12.1918	2.56716	0.635209	4.04144	5.3125e-05	0.00157522
TCONS_00009301	295.399	2.20781	0.546421	4.04049	5.33386e-05	0.00157545
TCONS_00011828	21.3624	-2.52937	0.626646	-4.03636	5.42863e-05	0.00159115
TCONS_00013440	6582.98	2.02066	0.50061	4.03639	5.42809e-05	0.00159115
TCONS_00007018	10.1906	2.88932	0.716039	4.03514	5.45701e-05	0.00159336
TCONS_00009539	105.136	1.84578	0.457813	4.03173	5.5367e-05	0.00160921
TCONS_00014691	17.8834	2.7395	0.679603	4.03103	5.55337e-05	0.00160921
TCONS_00004077	46.7399	1.99983	0.496432	4.02841	5.61556e-05	0.0016211
TCONS_00010300	143.908	1.55747	0.386812	4.02644	5.66286e-05	0.0016286
TCONS_00011619	180.944	1.57095	0.39028	4.02518	5.69315e-05	0.00163118
TCONS_00013604	139.213	1.54149	0.38328	4.02184	5.77447e-05	0.00164831
TCONS_00012034	2144.34	2.09457	0.521087	4.01961	5.82941e-05	0.00165781
TCONS_00000434	11.9603	2.73209	0.680319	4.0159	5.92189e-05	0.00167787
TCONS_00009731	13798.6	2.1359	0.532659	4.00989	6.07476e-05	0.00171483
TCONS_00002304	86.5054	1.52414	0.380702	4.0035	6.24124e-05	0.00175535
TCONS_00008484	167.496	1.81366	0.453355	4.00053	6.32001e-05	0.00176277
TCONS_00008676	142.332	1.44596	0.361521	3.99965	6.34354e-05	0.00176277
TCONS_00009298	19.4605	2.74232	0.685744	3.99905	6.3598e-05	0.00176277
TCONS_00012290	6688.96	2.12418	0.530865	4.00136	6.29802e-05	0.00176277
TCONS_00002689	1242.81	1.72548	0.431746	3.99652	6.42804e-05	0.00177525
TCONS_00011171	2064.72	2.03221	0.508627	3.99547	6.4566e-05	0.00177673
TCONS_00006772	33.1961	1.82715	0.457754	3.99156	6.56395e-05	0.00179357
TCONS_00008361	65.13	1.93163	0.483932	3.99154	6.56469e-05	0.00179357
TCONS_00003390	60.1144	1.94683	0.488242	3.98744	6.67905e-05	0.00180601
TCONS_00003984	43.8055	1.80518	0.452858	3.98619	6.71432e-05	0.00180601
TCONS_00006636	178.411	1.65264	0.414716	3.985	6.74797e-05	0.00180601
TCONS_00010771	192.976	1.87733	0.470746	3.98799	6.66352e-05	0.00180601
TCONS_00012825	863.786	2.06202	0.517339	3.98582	6.72488e-05	0.00180601
TCONS_00014877	523.178	1.74234	0.437239	3.98486	6.75189e-05	0.00180601
TCONS_00007899	57.1202	1.74432	0.438019	3.98229	6.82539e-05	0.00181931
TCONS_00002321	431.462	1.34288	0.337558	3.97821	6.94358e-05	0.00184257
TCONS_00003690	181.55	-1.22302	0.307476	-3.97762	6.96083e-05	0.00184257
TCONS_00011001	2174.45	2.19362	0.551935	3.97442	7.0551e-05	0.00186109
TCONS_00010483	83.055	2.08315	0.524418	3.97232	7.11767e-05	0.00187114
TCONS_00013219	4143.66	1.83224	0.462043	3.96553	7.32323e-05	0.00191859
TCONS_00000335	32.6315	2.13536	0.5386	3.96464	7.35063e-05	0.00191919
TCONS_00006066	3563.81	1.97617	0.499089	3.95956	7.50884e-05	0.00195383
TCONS_00004569	235.639	1.40027	0.353861	3.95712	7.58592e-05	0.0019672
TCONS_00011378	66.377	2.00047	0.505715	3.95572	7.63044e-05	0.00197206
TCONS_00004461	83.1978	-1.35806	0.343514	-3.95345	7.7033e-05	0.00198418
TCONS_00007143	38.1003	1.94798	0.493342	3.94854	7.86284e-05	0.00201173
TCONS_00007975	600.069	1.51486	0.383617	3.94887	7.85204e-05	0.00201173
TCONS_00005104	48.8136	1.84364	0.467079	3.94718	7.90771e-05	0.00201647
TCONS_00003186	427.365	1.47548	0.374239	3.9426	8.06014e-05	0.00204695
TCONS_00007014	147.144	1.9724	0.500355	3.94199	8.08077e-05	0.00204695
TCONS_00003492	149.795	1.74291	0.442373	3.9399	8.15152e-05	0.00205806
TCONS_00001687	37.9668	2.17234	0.551869	3.93634	8.2734e-05	0.00207084
TCONS_00006518	698.601	2.11364	0.536995	3.93605	8.28337e-05	0.00207084
TCONS_00007394	91.9218	1.32479	0.336489	3.9371	8.24737e-05	0.00207084
TCONS_00016251	230.771	2.0025	0.508978	3.93435	8.34228e-05	0.00207878
TCONS_00006411	161.394	1.39615	0.355125	3.93142	8.44456e-05	0.00209743
TCONS_00005432	814.728	1.67863	0.427215	3.92924	8.52156e-05	0.00210971
TCONS_00004417	8.11059	2.76755	0.70478	3.92683	8.60732e-05	0.00212406
TCONS_00006111	28.4837	1.91358	0.48786	3.9224	8.76727e-05	0.00215658
TCONS_00010759	127.181	1.3049	0.332785	3.92115	8.81264e-05	0.00216079
TCONS_00007729	6370.65	2.02882	0.517717	3.91878	8.89997e-05	0.00217523
TCONS_00013811	165.259	-1.32641	0.339402	-3.90808	9.30308e-05	0.00226652
TCONS_00004513	117.912	1.42612	0.36511	3.90598	9.38424e-05	0.00227182
TCONS_00004970	259.177	1.37719	0.352545	3.90641	9.36763e-05	0.00227182
TCONS_00013676	25.3392	1.84615	0.472895	3.90393	9.46444e-05	0.00228401
TCONS_00012925	7108.67	1.85707	0.47579	3.90314	9.49537e-05	0.00228426
TCONS_00000464	13.6724	2.37182	0.607886	3.90174	9.55017e-05	0.00229025
TCONS_00003340	126.044	1.3046	0.334657	3.89831	9.68655e-05	0.00229751
TCONS_00006622	1109.3	1.76613	0.453139	3.89755	9.71691e-05	0.00229751
TCONS_00007842	56.9503	1.59654	0.409661	3.89721	9.73063e-05	0.00229751
TCONS_00008962	270.98	1.45054	0.37216	3.89762	9.71415e-05	0.00229751
TCONS_00011209	109.639	1.49975	0.384614	3.89937	9.64414e-05	0.00229751
TCONS_00004414	1356.68	2.12149	0.544489	3.8963	9.7675e-05	0.00229912
TCONS_00002213	170.628	-1.09929	0.282224	-3.8951	9.81584e-05	0.00230341
TCONS_00001431	1121.63	1.84996	0.47555	3.89016	0.000100179	0.00232234
TCONS_00001941	346.235	-1.32855	0.341434	-3.89107	9.98013e-05	0.00232234
TCONS_00005439	544.751	1.93805	0.498057	3.89123	9.9738e-05	0.00232234
TCONS_00011706	82.7159	1.3886	0.356905	3.89068	9.99637e-05	0.00232234
TCONS_00004109	29.3645	1.7685	0.454775	3.88873	0.00010077	0.00232467
TCONS_00007364	18.6521	2.72668	0.701227	3.88845	0.000100888	0.00232467
TCONS_00003371	417.72	1.61335	0.415275	3.88502	0.000102323	0.00234981
TCONS_00012898	12212.6	2.04241	0.525801	3.88438	0.000102593	0.00234981
TCONS_00005057	365.44	-1.28467	0.33088	-3.88259	0.000103351	0.00235801
TCONS_00011588	187.854	1.28213	0.330268	3.88208	0.000103567	0.00235801
TCONS_00006503	63.0736	1.79594	0.462968	3.87918	0.000104811	0.00236549
TCONS_00010879	102.567	-1.30156	0.335528	-3.87915	0.000104824	0.00236549
TCONS_00015444	37.8636	2.06468	0.532079	3.8804	0.000104285	0.00236549
TCONS_00006560	99.827	1.52404	0.392966	3.87829	0.000105193	0.00236684
TCONS_00003350	4236.44	2.09393	0.540778	3.87207	0.000107915	0.00242097
TCONS_00009483	102.958	1.3591	0.351208	3.86979	0.000108929	0.00243657
TCONS_00008194	30.5337	2.01812	0.521913	3.86678	0.000110281	0.00245962
TCONS_00008908	323.181	1.18103	0.305704	3.86331	0.000111863	0.00247327
TCONS_00013325	149.194	1.92175	0.497259	3.86469	0.000111229	0.00247327
TCONS_00015622	62.3051	1.48351	0.383998	3.86331	0.000111861	0.00247327
TCONS_00013351	215.827	-1.17246	0.303739	-3.86008	0.00011335	0.00249893
TCONS_00010651	5991.71	2.04862	0.531136	3.85705	0.000114762	0.00251556
TCONS_00016899	1113.4	2.03565	0.527695	3.85763	0.000114493	0.00251556
TCONS_00008051	1637.7	2.04494	0.530417	3.85533	0.000115572	0.00252607
TCONS_00001469	5.31767	3.07314	0.797722	3.85239	0.000116969	0.00254208
TCONS_00016196	250.326	2.12449	0.551463	3.85246	0.000116937	0.00254208
TCONS_00001408	40.1515	1.98968	0.516994	3.84856	0.000118816	0.00257492
TCONS_00000737	5.64811	2.94171	0.76681	3.8363	0.000124903	0.00265639
TCONS_00001618	1530.23	1.9356	0.504575	3.83609	0.000125007	0.00265639
TCONS_00003850	18895.6	1.98909	0.518387	3.83707	0.000124511	0.00265639
TCONS_00006326	8399.73	2.00467	0.522122	3.83946	0.000123303	0.00265639
TCONS_00006824	169.151	-1.15011	0.299664	-3.83798	0.000124048	0.00265639
TCONS_00011761	89.592	-1.36302	0.354948	-3.84004	0.000123012	0.00265639
TCONS_00016657	660.495	-1.03687	0.270111	-3.83867	0.000123702	0.00265639
TCONS_00006487	9.12161	2.59815	0.677836	3.833	0.000126589	0.00268018
TCONS_00012958	4297.47	2.0334	0.530562	3.83254	0.000126827	0.00268018
TCONS_00008783	8.62581	2.65725	0.693523	3.83152	0.000127354	0.00268392
TCONS_00002115	1736.79	1.64063	0.428392	3.82975	0.000128276	0.0026959
TCONS_00014647	292.608	-1.1334	0.296184	-3.82667	0.000129889	0.00272232
TCONS_00010163	768.52	1.77595	0.464988	3.81935	0.000133805	0.00279673
TCONS_00008919	4.5632	3.04024	0.796622	3.81642	0.000135403	0.00282244
TCONS_00008091	3471.83	2.00999	0.527121	3.81314	0.000137211	0.00285235
TCONS_00016144	100.836	-1.34617	0.353774	-3.80516	0.000141715	0.00293798
TCONS_00008526	205.219	2.01863	0.530693	3.80376	0.000142515	0.00293866
TCONS_00013011	65.8731	2.27567	0.598243	3.80392	0.000142427	0.00293866
TCONS_00004722	4110.08	1.94298	0.510917	3.80294	0.00014299	0.00294053
TCONS_00013198	43.0984	1.8884	0.497546	3.79543	0.000147388	0.00301476
TCONS_00015929	28.5161	1.98871	0.523951	3.79559	0.000147291	0.00301476
TCONS_00004590	13118.4	1.95353	0.514969	3.79349	0.000148544	0.00302223
TCONS_00012842	19.992	2.02771	0.534488	3.79375	0.000148391	0.00302223
TCONS_00005344	80.8291	1.73786	0.458408	3.79108	0.000149993	0.00303556
TCONS_00007264	43.5527	2.32571	0.613422	3.79136	0.000149824	0.00303556
TCONS_00011281	205.424	1.22709	0.323944	3.78796	0.000151888	0.00306581
TCONS_00004001	39.5754	-1.75528	0.463606	-3.78614	0.000153003	0.00308019
TCONS_00013945	15.6011	2.40237	0.634681	3.78516	0.000153612	0.00308434
TCONS_00014297	31.9727	2.24972	0.594838	3.78207	0.00015553	0.00311468
TCONS_00011349	177.492	1.59799	0.423072	3.77712	0.000158655	0.00316896
TCONS_00006433	91.424	1.65758	0.438973	3.77603	0.000159345	0.00317444
TCONS_00014136	146.432	-1.19098	0.315504	-3.77485	0.000160101	0.00318123
TCONS_00007031	276.69	-1.20461	0.319281	-3.7729	0.000161361	0.00319797
TCONS_00005242	25.3875	-1.80428	0.479252	-3.76479	0.00016669	0.00329504
TCONS_00001586	120.641	1.32022	0.351166	3.75954	0.000170229	0.00334768
TCONS_00007816	108.951	1.51271	0.402351	3.75968	0.000170134	0.00334768
TCONS_00003381	55.5592	1.61183	0.428976	3.7574	0.00017169	0.00336776
TCONS_00012016	9784.42	1.84961	0.492438	3.75602	0.000172637	0.00337768
TCONS_00008275	767.278	1.768	0.470912	3.75442	0.000173742	0.00339062
TCONS_00004491	96.3548	1.51167	0.402966	3.75136	0.000175877	0.00340045
TCONS_00008804	67.8592	1.34697	0.35894	3.75263	0.000174987	0.00340045
TCONS_00013480	81.7999	-2.07292	0.552467	-3.75212	0.000175348	0.00340045
TCONS_00015982	73.4553	-1.5516	0.413634	-3.75115	0.000176023	0.00340045
TCONS_00005052	411.348	1.46771	0.391505	3.7489	0.000177614	0.00342253
TCONS_00012278	115.039	1.81308	0.483751	3.74797	0.000178274	0.00342663
TCONS_00015324	258.809	-1.39765	0.373108	-3.74596	0.000179705	0.00344547
TCONS_00002149	505.921	1.6017	0.427698	3.74494	0.00018044	0.00345092
TCONS_00006345	289.74	1.2648	0.33792	3.7429	0.000181906	0.00347029
TCONS_00000185	71.1414	-1.42439	0.381052	-3.73803	0.000185466	0.00350705
TCONS_00007342	419.418	1.81597	0.485855	3.73768	0.000185725	0.00350705
TCONS_00008893	37.3032	1.80991	0.484055	3.73905	0.000184717	0.00350705
TCONS_00009981	78.2277	1.68332	0.450323	3.73804	0.000185464	0.00350705
TCONS_00015093	247.023	1.43806	0.384803	3.73714	0.000186126	0.00350705
TCONS_00008365	47.6499	1.73951	0.465741	3.73494	0.000187761	0.00352916
TCONS_00007592	207.164	1.56036	0.418115	3.7319	0.000190043	0.0035373
TCONS_00011316	144.111	-1.35729	0.363637	-3.73254	0.000189557	0.0035373
TCONS_00012126	469.816	1.56934	0.420388	3.73308	0.000189152	0.0035373
TCONS_00015492	449.074	-1.07127	0.28703	-3.73226	0.000189773	0.0035373
TCONS_00002450	1798	1.88498	0.505395	3.72972	0.000191694	0.00355076
TCONS_00010917	18.3114	2.05206	0.550139	3.73006	0.000191431	0.00355076
TCONS_00008498	36.7365	1.70268	0.456878	3.72678	0.000193943	0.00357717
TCONS_00009738	409.609	1.51189	0.405698	3.72663	0.000194056	0.00357717
TCONS_00000275	259.406	1.5047	0.403966	3.72482	0.000195451	0.00357737
TCONS_00003170	1205.41	1.63101	0.437897	3.72464	0.000195597	0.00357737
TCONS_00008080	17.3703	2.50321	0.672039	3.7248	0.00019547	0.00357737
TCONS_00013463	22.1816	1.89325	0.508365	3.7242	0.000195937	0.00357737
TCONS_00007714	8729.29	1.93699	0.520373	3.7223	0.000197414	0.00358197
TCONS_00010435	7460.2	1.99932	0.537114	3.72234	0.000197384	0.00358197
TCONS_00010723	7357.1	1.92464	0.517087	3.72207	0.000197594	0.00358197
TCONS_00007223	6119.22	1.91069	0.513549	3.72057	0.000198775	0.00359487
TCONS_00003801	40.9893	1.59654	0.4297	3.71548	0.000202819	0.00365935
TCONS_00016276	28.2922	1.90709	0.513799	3.71174	0.000205842	0.00370515
TCONS_00014027	1224.95	1.37552	0.370681	3.71079	0.000206617	0.00371038
TCONS_00014821	138.129	1.37907	0.371739	3.70977	0.000207447	0.00371656
TCONS_00008595	231.181	1.35776	0.366106	3.70866	0.000208358	0.00372416
TCONS_00007337	87.4664	2.2073	0.596052	3.70319	0.000212905	0.00379103
TCONS_00007644	31.8146	1.66576	0.449844	3.70297	0.000213091	0.00379103
TCONS_00006160	303.345	-1.21011	0.326858	-3.70225	0.000213692	0.00379292
TCONS_00007004	22.0653	2.24227	0.605775	3.70148	0.000214343	0.00379372
TCONS_00007724	7730.9	1.9573	0.528853	3.70103	0.000214729	0.00379372
TCONS_00004988	1920.87	1.70233	0.460475	3.6969	0.000218249	0.00384702
TCONS_00015809	49.6999	1.61145	0.436093	3.6952	0.000219711	0.00386388
TCONS_00015058	148.112	1.91016	0.517989	3.68765	0.000226338	0.0039713
TCONS_00010108	25.999	2.41974	0.656337	3.68673	0.000227153	0.00397647
TCONS_00005793	592.249	1.44536	0.39262	3.68132	0.000232029	0.00405256
TCONS_00015091	39.9705	1.68551	0.457995	3.68019	0.000233061	0.00406131
TCONS_00004496	932.735	1.97405	0.536763	3.6777	0.000235348	0.00408257
TCONS_00009499	15886.7	1.913	0.520128	3.67795	0.000235117	0.00408257
TCONS_00001636	1681.52	2.11933	0.576609	3.67551	0.000237374	0.00410555
TCONS_00013649	2818.98	1.94037	0.527976	3.67511	0.000237746	0.00410555
TCONS_00004040	5122.49	1.94153	0.52904	3.6699	0.000242644	0.00417129
TCONS_00010718	512.008	-0.957219	0.260818	-3.67007	0.000242484	0.00417129
TCONS_00001922	231.3	1.61874	0.441261	3.66845	0.000244026	0.00417225
TCONS_00004837	1182.15	1.72144	0.469298	3.66813	0.000244335	0.00417225
TCONS_00015270	597.126	1.19648	0.326133	3.66868	0.000243809	0.00417225
TCONS_00009670	508.801	1.92324	0.5245	3.66681	0.000245598	0.00417517
TCONS_00016617	27.8641	1.87573	0.511506	3.66708	0.000245333	0.00417517
TCONS_00013326	323.675	-1.10251	0.300754	-3.66582	0.00024655	0.00418206
TCONS_00007781	21.1611	-2.02784	0.553949	-3.6607	0.00025153	0.0042477
TCONS_00008651	3334.64	1.88369	0.514572	3.6607	0.00025153	0.0042477
TCONS_00005255	1362.36	1.78674	0.488311	3.65902	0.000253181	0.00425038
TCONS_00007894	1296.86	1.66292	0.45455	3.6584	0.000253795	0.00425038
TCONS_00009133	3551.94	1.60538	0.438723	3.65922	0.000252979	0.00425038
TCONS_00011533	63.9391	1.47856	0.404168	3.65828	0.000253912	0.00425038
TCONS_00003211	2950.54	1.2292	0.336226	3.65587	0.00025631	0.00426842
TCONS_00005930	10494.2	1.90741	0.52179	3.65552	0.000256663	0.00426842
TCONS_00012716	27.5482	2.16837	0.593094	3.65603	0.000256154	0.00426842
TCONS_00004229	34.037	1.69802	0.464636	3.65452	0.00025766	0.00427571
TCONS_00008779	107.818	1.57725	0.431663	3.65388	0.000258305	0.00427713
TCONS_00014441	7041.12	-1.26896	0.347547	-3.65119	0.000261027	0.00431286
TCONS_00007868	22.7687	2.14741	0.588301	3.65019	0.00026205	0.00432043
TCONS_00013180	70.9417	1.66883	0.457816	3.64521	0.000267174	0.00439544
TCONS_00008195	2845.41	1.88884	0.518432	3.64338	0.000269082	0.00440788
TCONS_00010831	111.341	-1.45473	0.39924	-3.64375	0.000268696	0.00440788
TCONS_00011338	73.2341	1.48843	0.408632	3.64247	0.000270037	0.00441407
TCONS_00003258	250.232	-1.06324	0.292276	-3.63781	0.000274967	0.00448507
TCONS_00006719	398.237	-0.976191	0.268392	-3.63719	0.00027563	0.00448632
TCONS_00000980	5875.97	1.92666	0.530311	3.63308	0.000280059	0.00451994
TCONS_00010482	2544.57	1.93991	0.533827	3.63397	0.000279098	0.00451994
TCONS_00013343	67.7208	1.25569	0.345578	3.63358	0.000279513	0.00451994
TCONS_00015897	79.9237	-1.39125	0.382861	-3.63384	0.000279238	0.00451994
TCONS_00007152	95.1467	1.34326	0.369902	3.63141	0.000281879	0.00453019
TCONS_00009361	144.622	-1.10433	0.304072	-3.63181	0.000281441	0.00453019
TCONS_00003032	1981.93	1.91431	0.527696	3.62768	0.000285974	0.00457237
TCONS_00012218	49.2594	-1.51561	0.417751	-3.62802	0.000285603	0.00457237
TCONS_00014357	27.3134	1.95087	0.537816	3.62739	0.000286296	0.00457237
TCONS_00016082	21.2043	-1.97175	0.543704	-3.62652	0.000287269	0.00457835
TCONS_00016886	25.2419	-1.78258	0.491814	-3.62449	0.000289531	0.00460481
TCONS_00014432	321.698	1.50658	0.415734	3.62391	0.000290187	0.00460566
TCONS_00003879	160.337	1.33311	0.367958	3.623	0.000291207	0.00461228
TCONS_00007514	2015.81	1.74875	0.482928	3.62115	0.000293295	0.00462977
TCONS_00011539	2528.26	1.71861	0.47463	3.62095	0.000293521	0.00462977
TCONS_00011867	9503.71	1.94575	0.538048	3.61632	0.000298827	0.00470375
TCONS_00016677	5781.61	-0.883853	0.244511	-3.61477	0.000300611	0.00472212
TCONS_00014833	2575.45	1.91483	0.529849	3.61391	0.00030161	0.0047281
TCONS_00014286	60.3955	-1.56638	0.433685	-3.6118	0.000304078	0.00475704
TCONS_00014682	23.5477	2.28379	0.632811	3.60896	0.000307422	0.00479954
TCONS_00005400	66.2003	2.01115	0.557454	3.60774	0.000308877	0.00480281
TCONS_00005536	15.0005	2.17998	0.604293	3.60749	0.000309171	0.00480281
TCONS_00012817	12222.2	1.89168	0.524494	3.60668	0.000310142	0.00480281
TCONS_00013870	45.943	1.37124	0.380187	3.60676	0.000310044	0.00480281
TCONS_00015184	45025.7	1.59938	0.44447	3.59839	0.00032019	0.00494839
TCONS_00000071	177.778	1.18622	0.329904	3.59566	0.000323572	0.00497623
TCONS_00007176	124.016	1.42236	0.39561	3.59536	0.000323943	0.00497623
TCONS_00012431	72.5998	-1.45682	0.405103	-3.59618	0.00032293	0.00497623
TCONS_00001760	50.1359	1.37828	0.383431	3.59461	0.000324883	0.00498067
TCONS_00003069	1853.03	1.91573	0.533501	3.59087	0.000329573	0.00502453
TCONS_00007864	6215.88	1.59561	0.444367	3.59076	0.000329714	0.00502453
TCONS_00015990	7610.21	1.92164	0.535068	3.5914	0.00032891	0.00502453
TCONS_00003755	467.236	-1.07812	0.30034	-3.58968	0.000331086	0.00503541
TCONS_00007374	249.401	1.41116	0.393326	3.58777	0.000333522	0.00506238
TCONS_00013808	364.346	-0.926665	0.258504	-3.58472	0.000337438	0.00511168
TCONS_00001499	126.889	1.28796	0.359642	3.58122	0.000341991	0.00517042
TCONS_00005782	84.7346	-1.21434	0.33916	-3.58043	0.000343029	0.00517589
TCONS_00001945	725.837	1.37969	0.385974	3.57458	0.000350789	0.00526553
TCONS_00003634	12.1743	-2.26645	0.634169	-3.57389	0.000351723	0.00526553
TCONS_00008912	3695.71	1.00322	0.280638	3.57479	0.000350511	0.00526553
TCONS_00012345	86.0106	-1.32907	0.371832	-3.57438	0.000351061	0.00526553
TCONS_00010716	5293.6	1.88383	0.527515	3.57113	0.000355444	0.00531083
TCONS_00002787	1884.25	1.94599	0.545179	3.56945	0.000357736	0.00532567
TCONS_00006798	6715.56	1.57909	0.442463	3.56887	0.000358525	0.00532567
TCONS_00012464	182.892	-1.10995	0.310991	-3.56908	0.00035824	0.00532567
TCONS_00015928	128.532	1.55004	0.434517	3.56727	0.000360721	0.0053479
TCONS_00007063	29.8305	1.89383	0.531155	3.5655	0.000363159	0.00536741
TCONS_00008451	232.18	1.77932	0.499067	3.5653	0.00036344	0.00536741
TCONS_00002513	23.8583	1.94749	0.546665	3.56249	0.000367359	0.00541483
TCONS_00004905	154.823	1.52935	0.42936	3.56192	0.000368157	0.00541616
TCONS_00002157	130.956	1.63118	0.458205	3.55993	0.000370959	0.0054469
TCONS_00013192	77.8854	1.64712	0.462764	3.5593	0.000371839	0.00544937
TCONS_00003809	157.847	1.49594	0.420449	3.55796	0.000373749	0.00546688
TCONS_00005554	317.461	1.61553	0.454246	3.55652	0.000375806	0.00548546
TCONS_00011974	292.458	1.28188	0.360477	3.55606	0.000376453	0.00548546
TCONS_00015808	46.5045	2.00414	0.563778	3.55483	0.000378217	0.00549748
TCONS_00016925	252.347	1.71327	0.482003	3.55449	0.000378715	0.00549748
TCONS_00016092	714.948	-1.02504	0.288642	-3.55124	0.00038342	0.00554473
TCONS_00016663	10.1529	2.35737	0.663771	3.55148	0.000383065	0.00554473
TCONS_00004495	6610.44	1.80402	0.508191	3.54989	0.000385392	0.00556274
TCONS_00014480	28.0841	1.78988	0.504695	3.54647	0.000390428	0.00562481
TCONS_00003111	597.32	1.03213	0.291078	3.54587	0.00039132	0.00562707
TCONS_00006286	252.547	1.72551	0.486851	3.54422	0.00039378	0.00565182
TCONS_00004468	48.8756	1.53282	0.432749	3.54205	0.000397027	0.00568076
TCONS_00011240	79.5892	1.41024	0.398162	3.54188	0.000397282	0.00568076
TCONS_00001940	63.1006	1.51087	0.427262	3.53617	0.000405979	0.00579428
TCONS_00015344	195.338	-1.0473	0.296231	-3.53543	0.000407111	0.00579963
TCONS_00007888	38.7828	1.73098	0.489695	3.5348	0.000408081	0.00580263
TCONS_00000307	231.151	1.04361	0.295372	3.53322	0.000410538	0.00582674
TCONS_00015704	13.613	2.07703	0.589239	3.52494	0.000423578	0.00600069
TCONS_00000510	192.545	1.85728	0.527106	3.52353	0.000425833	0.00602148
TCONS_00000347	96.0751	1.19872	0.340501	3.52047	0.000430775	0.00608013
TCONS_00015824	6.49647	2.70917	0.770338	3.51686	0.000436685	0.00615219
TCONS_00014489	37.4876	1.92323	0.546953	3.51627	0.00043766	0.0061546
TCONS_00010675	1070.94	1.86669	0.530959	3.51569	0.00043861	0.00615663
TCONS_00000990	65.1621	1.43135	0.407316	3.51409	0.000441265	0.00617126
TCONS_00004271	1295.05	-0.93624	0.266413	-3.51424	0.00044101	0.00617126
TCONS_00006656	2958.62	1.849	0.526549	3.51154	0.000445519	0.00621574
TCONS_00009035	18.0816	1.92855	0.549254	3.51121	0.00044607	0.00621574
TCONS_00005714	50.5112	1.49374	0.425515	3.51043	0.000447388	0.00622276
TCONS_00015552	129.447	1.93187	0.550724	3.50787	0.000451716	0.00627156
TCONS_00016930	4.64563	2.8194	0.804196	3.50587	0.000455123	0.00630741
TCONS_00005544	52.2728	-1.34216	0.383274	-3.50182	0.000462097	0.00639248
TCONS_00011379	108.34	1.49782	0.427876	3.50059	0.000464229	0.00641039
TCONS_00011472	510.049	-0.98707	0.282377	-3.49557	0.000473042	0.00652031
TCONS_00005193	9410.58	1.77478	0.507803	3.49501	0.000474038	0.00652229
TCONS_00016156	640.632	1.80446	0.516382	3.49443	0.000475078	0.00652486
TCONS_00000309	1013.33	1.29947	0.372182	3.49149	0.000480332	0.00658519
TCONS_00013794	33.9887	2.02981	0.581491	3.4907	0.000481756	0.0065929
TCONS_00011116	28.9543	-1.9555	0.560577	-3.48838	0.000485962	0.00663859
TCONS_00014335	444.863	-1.03349	0.296332	-3.4876	0.000487379	0.00664607
TCONS_00008663	50.1868	1.55969	0.44776	3.48332	0.000495236	0.0067412
TCONS_00004464	182.395	-1.12328	0.322684	-3.48106	0.00049944	0.00676831
TCONS_00007718	6479.67	1.85703	0.533649	3.47987	0.000501651	0.00676831
TCONS_00010677	3308.79	1.62777	0.467692	3.48044	0.000500598	0.00676831
TCONS_00010969	4688.45	1.83486	0.527123	3.4809	0.000499735	0.00676831
TCONS_00013630	142.924	-1.14639	0.329413	-3.4801	0.000501221	0.00676831
TCONS_00014349	331.519	1.30726	0.375776	3.47882	0.000503619	0.00678289
TCONS_00010220	4.52326	2.7245	0.783956	3.47532	0.000510243	0.00686003
TCONS_00000583	25.3097	1.65021	0.474944	3.47453	0.000511743	0.00686103
TCONS_00010440	3008.51	1.83503	0.528188	3.47421	0.000512365	0.00686103
TCONS_00010633	245.018	1.33646	0.384758	3.4735	0.000513715	0.00686103
TCONS_00015719	19.1093	1.8078	0.52047	3.4734	0.000513905	0.00686103
TCONS_00006035	59.2782	-1.24821	0.359414	-3.4729	0.000514863	0.00686185
TCONS_00015998	429.19	-0.91988	0.264952	-3.47187	0.000516851	0.00687636
TCONS_00014426	3475.78	1.82164	0.524828	3.47093	0.000518663	0.00688849
TCONS_00004377	365.381	1.55945	0.449437	3.46978	0.000520887	0.00690604
TCONS_00005139	713.872	-1.02479	0.295391	-3.46925	0.000521907	0.00690759
TCONS_00003584	81.2863	1.42713	0.411605	3.46723	0.000525844	0.00694602
TCONS_00007378	13.5074	2.00305	0.577853	3.46637	0.000527534	0.00694602
TCONS_00012189	120.031	1.91175	0.55149	3.46652	0.000527236	0.00694602
TCONS_00004723	310.556	-0.972835	0.28074	-3.46525	0.000529731	0.00695364
TCONS_00007613	148.595	1.64531	0.474816	3.46515	0.000529931	0.00695364
TCONS_00009675	291.566	1.27192	0.367129	3.46451	0.000531197	0.00695832
TCONS_00003183	21.22	1.88933	0.545431	3.46393	0.000532348	0.00696148
TCONS_00008447	374.738	-0.98838	0.285435	-3.46272	0.000534748	0.00698092
TCONS_00010643	164.356	1.18818	0.343732	3.45671	0.000546821	0.00711425
TCONS_00013087	28.4842	1.60988	0.465709	3.45684	0.000546544	0.00711425
TCONS_00008942	55.1181	1.68232	0.486979	3.45461	0.000551093	0.00715766
TCONS_00009403	155.844	-1.05348	0.305125	-3.45263	0.000555157	0.00719822
TCONS_00013397	47.4133	1.31291	0.380587	3.4497	0.000561207	0.00726436
TCONS_00016447	259.534	-0.924787	0.26828	-3.44709	0.000566655	0.00732248
TCONS_00005412	2302.68	1.90897	0.554142	3.44491	0.000571241	0.0073693
TCONS_00001244	98.0332	-1.17198	0.340792	-3.43899	0.00058389	0.00751979
TCONS_00002603	84.8411	1.31755	0.383485	3.43572	0.000590972	0.00759821
TCONS_00007856	7369.08	1.85897	0.541352	3.43394	0.000594875	0.00763556
TCONS_00002737	203.43	1.25538	0.365737	3.43248	0.000598095	0.00766403
TCONS_00006561	23.9592	1.80009	0.524658	3.43098	0.000601416	0.0076937
TCONS_00014878	284.222	1.54891	0.451787	3.42841	0.000607122	0.00775373
TCONS_00006665	120.773	-1.01678	0.296664	-3.42737	0.000609457	0.00777058
TCONS_00000072	99.7048	1.36465	0.39839	3.4254	0.000613895	0.00777091
TCONS_00001837	47588.5	0.907669	0.2649	3.42646	0.000611515	0.00777091
TCONS_00004287	237.553	1.33904	0.390876	3.42574	0.000613116	0.00777091
TCONS_00011807	142.977	1.55566	0.454193	3.4251	0.000614562	0.00777091
TCONS_00014664	672.374	-1.07181	0.312839	-3.42609	0.000612338	0.00777091
TCONS_00009891	6.12411	-2.61548	0.764081	-3.42304	0.000619254	0.00780444
TCONS_00013163	251.591	1.32173	0.386115	3.42316	0.000618973	0.00780444
TCONS_00015463	3429.16	-0.85524	0.249884	-3.42254	0.000620387	0.00780586
TCONS_00002472	677.815	1.77904	0.519888	3.42196	0.000621724	0.00780983
TCONS_00009220	202.593	1.54514	0.452005	3.41841	0.000629891	0.00789945
TCONS_00005443	66.9946	1.35115	0.395498	3.41633	0.000634724	0.00793405
TCONS_00008169	249.021	1.34918	0.394906	3.41646	0.000634407	0.00793405
TCONS_00003064	309.966	1.12178	0.328677	3.41302	0.000642466	0.00799164
TCONS_00007623	211.669	1.44624	0.423661	3.41367	0.000640951	0.00799164
TCONS_00014689	8.73493	2.64418	0.774644	3.41342	0.000641531	0.00799164
TCONS_00009315	27.0822	2.01263	0.589913	3.41174	0.000645486	0.00801618
TCONS_00006082	285.581	1.28253	0.376199	3.40918	0.000651596	0.00805732
TCONS_00011429	176.542	-0.946021	0.277505	-3.40902	0.000651958	0.00805732
TCONS_00014989	789.63	1.84152	0.540172	3.40914	0.000651676	0.00805732
TCONS_00010501	116.055	1.4054	0.412363	3.40817	0.000654007	0.0080696
TCONS_00001111	618.887	1.29999	0.381524	3.40736	0.000655935	0.00808036
TCONS_00009583	176.762	1.63106	0.479046	3.40481	0.000662113	0.00814335
TCONS_00011019	57.2679	1.49074	0.438075	3.40293	0.000666669	0.00818623
TCONS_00003787	54.3975	1.55517	0.457367	3.40026	0.000673208	0.00824351
TCONS_00015673	1470.91	1.76449	0.518946	3.40015	0.000673489	0.00824351
TCONS_00012855	117.077	1.99529	0.586936	3.3995	0.000675082	0.00824981
TCONS_00011736	472.448	1.31639	0.387398	3.39803	0.000678731	0.00828116
TCONS_00008549	69.9316	-1.43611	0.423034	-3.39478	0.000686839	0.00836675
TCONS_00005000	32.9608	-1.48851	0.43881	-3.39214	0.000693477	0.00843419
TCONS_00013909	71.2169	-1.27794	0.376797	-3.39158	0.000694908	0.00843816
TCONS_00013606	113.401	1.35278	0.398988	3.39053	0.000697577	0.00845716
TCONS_00015325	51.4019	1.65489	0.488207	3.38973	0.000699619	0.00846849
TCONS_00009045	93.9296	-1.12194	0.331231	-3.38718	0.000706147	0.00853401
TCONS_00000788	116.948	1.27932	0.377988	3.38456	0.000712935	0.00860245
TCONS_00005613	197.843	1.64952	0.487495	3.38367	0.000715241	0.00861668
TCONS_00000093	111.221	1.07289	0.317881	3.37513	0.000737801	0.00881702
TCONS_00000432	20.7917	2.10918	0.624986	3.37477	0.000738785	0.00881702
TCONS_00003618	200.294	-1.04439	0.30935	-3.37607	0.000735305	0.00881702
TCONS_00005100	77.6858	1.59391	0.472282	3.3749	0.000738413	0.00881702
TCONS_00006273	19.6913	1.87726	0.556179	3.37528	0.000737417	0.00881702
TCONS_00010809	1163.47	1.6695	0.494529	3.37594	0.000735632	0.00881702
TCONS_00009687	43.2818	1.4077	0.417348	3.37296	0.000743657	0.00886133
TCONS_00016726	481.21	-0.911124	0.27021	-3.37191	0.000746497	0.00888134
TCONS_00003558	96.6555	-1.11841	0.33175	-3.37126	0.000748253	0.00888841
TCONS_00009832	144.689	1.32295	0.392499	3.37059	0.000750061	0.00889607
TCONS_00003891	62.8924	1.61458	0.479153	3.36966	0.000752623	0.00889891
TCONS_00009756	170.592	1.28404	0.381098	3.36931	0.000753564	0.00889891
TCONS_00014342	10.8302	2.27845	0.676338	3.3688	0.000754953	0.00889891
TCONS_00015656	53.6815	1.51134	0.448617	3.36888	0.000754747	0.00889891
TCONS_00001300	42.3347	-1.5106	0.448842	-3.36555	0.000763903	0.00892252
TCONS_00001549	54.6625	1.54699	0.459597	3.36596	0.000762778	0.00892252
TCONS_00003443	150.46	-1.04468	0.310305	-3.36662	0.000760962	0.00892252
TCONS_00004743	87.0487	1.24281	0.369072	3.36739	0.000758822	0.00892252
TCONS_00010791	157.057	1.36498	0.405402	3.36697	0.000759977	0.00892252
TCONS_00014047	120.655	1.82534	0.542362	3.36553	0.000763954	0.00892252
TCONS_00004996	223.934	-1.0108	0.300604	-3.36255	0.000772261	0.00900579
TCONS_00011172	120.922	-1.23736	0.368298	-3.35967	0.000780365	0.00908644
TCONS_00004987	1025.36	1.68028	0.500344	3.35824	0.000784403	0.0091099
TCONS_00006127	660.742	1.14956	0.342324	3.35811	0.000784761	0.0091099
TCONS_00001188	675.341	1.53271	0.456679	3.3562	0.000790216	0.00915932
TCONS_00012543	141.266	1.80883	0.539095	3.35531	0.000792755	0.00917485
TCONS_00009789	128.024	-1.2682	0.378289	-3.35247	0.000800928	0.00925544
TCONS_00006852	33.8419	-1.45589	0.434388	-3.3516	0.000803473	0.00927084
TCONS_00007851	27.3564	2.05828	0.614526	3.34937	0.000809957	0.00933158
TCONS_00008941	12.4637	2.24819	0.671335	3.34884	0.00081151	0.00933542
TCONS_00008897	676.206	1.0482	0.31309	3.34793	0.000814179	0.00933803
TCONS_00012594	283.397	-0.943438	0.281791	-3.348	0.000813962	0.00933803
TCONS_00011787	10.9217	2.10646	0.629376	3.3469	0.000817196	0.00934462
TCONS_00015451	35.9492	-1.53941	0.459927	-3.34708	0.000816685	0.00934462
TCONS_00014287	71.4632	-1.14572	0.342434	-3.34581	0.000820434	0.00936765
TCONS_00004195	37.4565	1.33492	0.399275	3.34336	0.000827691	0.00941189
TCONS_00004570	164.185	1.45713	0.436046	3.34169	0.000832704	0.00941189
TCONS_00006735	205.4	-0.909794	0.272246	-3.34181	0.00083234	0.00941189
TCONS_00006939	149.738	1.36013	0.406781	3.34364	0.000826877	0.00941189
TCONS_00011509	12.7246	1.98933	0.595087	3.34291	0.000829036	0.00941189
TCONS_00014253	471.161	-0.845248	0.252946	-3.34162	0.000832922	0.00941189
TCONS_00016445	9.48748	2.36596	0.707853	3.34245	0.000830426	0.00941189
TCONS_00002753	12.3336	2.11661	0.633943	3.33881	0.000841386	0.00949351
TCONS_00010107	24.2054	2.16797	0.649522	3.33779	0.000844471	0.00951429
TCONS_00007743	77.7549	1.3082	0.392008	3.33719	0.000846312	0.00952101
TCONS_00010573	62.546	1.46456	0.439084	3.33548	0.000851519	0.00952804
TCONS_00012035	59.3953	1.31925	0.395447	3.33609	0.00084966	0.00952804
TCONS_00012959	37.3311	1.81819	0.545126	3.33535	0.000851919	0.00952804
TCONS_00013688	275.991	1.32005	0.395644	3.33646	0.000848521	0.00952804
TCONS_00016946	23.951	-1.63875	0.491775	-3.33231	0.000861289	0.00961877
TCONS_00001306	113.455	1.14489	0.344056	3.32763	0.000875872	0.00972485
TCONS_00005293	377.676	1.71458	0.515103	3.32862	0.000872761	0.00972485
TCONS_00009700	274.125	-0.917834	0.275774	-3.32821	0.000874075	0.00972485
TCONS_00015381	16935.9	1.8027	0.54171	3.3278	0.000875357	0.00972485
TCONS_00015406	598.917	-0.853939	0.256951	-3.32336	0.000889411	0.00986086
TCONS_00015925	83.8673	1.64236	0.49444	3.32165	0.000894875	0.00990708
TCONS_00014005	366.383	1.41626	0.426505	3.32063	0.000898161	0.00992909
TCONS_00013949	444.708	1.79777	0.541473	3.32015	0.000899686	0.0099316
TCONS_00000222	241.66	1.43051	0.431057	3.31861	0.000904663	0.00996859
TCONS_00010634	74.9127	1.87509	0.565075	3.31831	0.000905643	0.00996859
TCONS_00007615	26.6948	-1.70035	0.513122	-3.31374	0.000920562	0.0101182
TCONS_00013740	58.2704	-1.22018	0.368326	-3.31278	0.000923748	0.0101387
TCONS_00000292	192.065	-1.1204	0.338864	-3.30636	0.00094518	0.0103591
TCONS_00000843	105.378	1.46893	0.444508	3.30462	0.000951061	0.0104086
TCONS_00001531	1203.77	1.45686	0.441167	3.30228	0.000959029	0.0104341
TCONS_00004656	305.405	1.0651	0.32257	3.30193	0.000960209	0.0104341
TCONS_00005198	196.423	1.61005	0.487486	3.30276	0.000957373	0.0104341
TCONS_00009194	129.167	-1.16456	0.352682	-3.30202	0.000959919	0.0104341
TCONS_00013057	3880.46	1.53114	0.463622	3.30255	0.000958091	0.0104341
TCONS_00000219	177.117	1.16782	0.353729	3.30147	0.000961803	0.0104366
TCONS_00011972	89.0369	-1.12735	0.341955	-3.29677	0.000978027	0.0105976
TCONS_00003389	135.791	1.28344	0.389595	3.29428	0.000986732	0.0106467
TCONS_00012571	78.8371	1.3975	0.424121	3.29504	0.000984063	0.0106467
TCONS_00014491	34.6315	1.82088	0.552696	3.29454	0.000985838	0.0106467
TCONS_00002581	1024.13	1.23622	0.37562	3.29114	0.000997819	0.010736
TCONS_00005451	148.979	-1.09731	0.333379	-3.29148	0.000996625	0.010736
TCONS_00012220	106.368	1.20294	0.365768	3.28881	0.00100611	0.0108101
TCONS_00002923	30.5947	1.58666	0.482893	3.28574	0.00101714	0.0109132
TCONS_00010273	97.9441	-1.12452	0.342357	-3.28463	0.00102115	0.0109371
TCONS_00011278	35.4797	1.45793	0.443903	3.28434	0.00102223	0.0109371
TCONS_00012042	4.11214	-2.63961	0.804069	-3.28281	0.00102777	0.0109811
TCONS_00002144	54.0577	1.37267	0.41832	3.28138	0.001033	0.0110215
TCONS_00002813	259.534	-0.912309	0.278143	-3.28	0.00103807	0.0110602
TCONS_00005701	85.4702	1.62197	0.494614	3.27928	0.00104074	0.0110732
TCONS_00010493	129.823	1.11787	0.341011	3.27811	0.00104506	0.0111037
TCONS_00013196	4.72949	2.57577	0.786179	3.27632	0.0010517	0.0111588
TCONS_00002401	52.6889	1.25302	0.382507	3.27581	0.00105358	0.0111633
TCONS_00005752	41.8088	-1.37824	0.421053	-3.27333	0.00106289	0.0112463
TCONS_00003876	260.341	1.43067	0.437352	3.27122	0.00107084	0.0112837
TCONS_00006000	74.7095	1.74334	0.532894	3.27147	0.00106991	0.0112837
TCONS_00013582	300.634	-0.887749	0.271351	-3.27159	0.00106944	0.0112837
TCONS_00011581	59.7849	1.66369	0.508791	3.26988	0.00107591	0.0113215
TCONS_00006264	51.0163	1.6308	0.498884	3.2689	0.00107967	0.0113454
TCONS_00011593	117.4	1.51369	0.46323	3.26769	0.00108428	0.0113782
TCONS_00011802	182.798	1.24029	0.37966	3.26684	0.00108756	0.011397
TCONS_00006810	3365.07	1.80912	0.554079	3.26509	0.00109428	0.0114518
TCONS_00008895	318.934	-0.961772	0.294628	-3.26436	0.00109713	0.0114659
TCONS_00006153	564.709	-1.06537	0.326484	-3.26316	0.00110176	0.0114986
TCONS_00010010	94.4216	-1.0809	0.331342	-3.2622	0.00110552	0.0115222
TCONS_00006816	5388.87	1.32175	0.405282	3.2613	0.00110902	0.0115429
TCONS_00010539	52.5029	1.45168	0.445241	3.26043	0.00111243	0.0115627
TCONS_00014040	270.559	-0.964811	0.296064	-3.2588	0.00111886	0.0116137
TCONS_00004105	30.7278	1.83557	0.563371	3.25818	0.00112128	0.011623
TCONS_00004877	99.6718	1.43685	0.441251	3.2563	0.00112875	0.0116846
TCONS_00001526	57.3348	-1.37526	0.422529	-3.25481	0.00113466	0.01173
TCONS_00016078	23.8493	-1.541	0.473565	-3.25404	0.00113776	0.0117461
TCONS_00015881	142.752	1.06945	0.328782	3.25277	0.00114288	0.011783
TCONS_00013838	68.5417	1.65858	0.510197	3.25085	0.00115059	0.0118465
TCONS_00001977	210.032	1.19232	0.366942	3.24936	0.00115666	0.0118612
TCONS_00006785	25.3654	1.71203	0.526873	3.24942	0.00115643	0.0118612
TCONS_00010907	129.252	-1.12119	0.344972	-3.25011	0.00115362	0.0118612
TCONS_00000011	29.0761	1.86062	0.573076	3.24673	0.00116741	0.0119536
TCONS_00010654	93.7061	1.66566	0.513081	3.24639	0.00116879	0.0119536
TCONS_00011480	47.6904	1.69997	0.523867	3.24504	0.00117433	0.0119941
TCONS_00005186	153.701	1.023	0.315391	3.24359	0.00118034	0.0120395
TCONS_00013616	88.027	-1.28067	0.395078	-3.24155	0.00118881	0.0121097
TCONS_00005715	18.9792	2.10791	0.650861	3.23864	0.001201	0.0121739
TCONS_00008840	129.436	-1.03734	0.320242	-3.23925	0.00119847	0.0121739
TCONS_00011064	293.892	1.29122	0.398581	3.23953	0.00119728	0.0121739
TCONS_00011405	122.266	1.43048	0.441707	3.23853	0.00120148	0.0121739
TCONS_00005727	2998.6	1.34843	0.416449	3.23793	0.001204	0.0121833
TCONS_00005872	416.385	1.17361	0.362803	3.23485	0.00121707	0.0122993
TCONS_00010819	66.6835	-1.13296	0.35091	-3.22864	0.00124382	0.0125531
TCONS_00002286	6.57782	2.40078	0.74371	3.22811	0.00124612	0.0125597
TCONS_00003122	565.898	1.44544	0.448146	3.22538	0.00125804	0.0126632
TCONS_00009677	291.717	-0.991619	0.307642	-3.22329	0.00126729	0.0127395
TCONS_00004838	134.888	-0.97763	0.303349	-3.22279	0.00126949	0.0127449
TCONS_00009894	60.3591	1.56863	0.486826	3.22216	0.00127228	0.0127561
TCONS_00004108	898.584	1.62903	0.505786	3.22079	0.00127839	0.0127613
TCONS_00006185	424.215	-0.919657	0.285559	-3.22055	0.00127946	0.0127613
TCONS_00010770	46.7753	-1.33967	0.415931	-3.22088	0.00127796	0.0127613
TCONS_00012236	12.8053	1.98959	0.617614	3.22141	0.00127563	0.0127613
TCONS_00009442	32.2113	1.90219	0.591053	3.2183	0.00128953	0.0128449
TCONS_00009699	193.168	1.54143	0.479208	3.21661	0.00129713	0.0129038
TCONS_00014917	124.887	1.25296	0.389654	3.21557	0.00130187	0.0129342
TCONS_00006327	76.5866	-1.34527	0.419008	-3.2106	0.00132459	0.0131428
TCONS_00004487	233.127	1.65609	0.515968	3.20969	0.0013288	0.0131675
TCONS_00008420	240.438	1.18227	0.368586	3.20758	0.00133859	0.0132473
TCONS_00001654	116.875	1.17606	0.366769	3.20654	0.00134342	0.0132609
TCONS_00013408	43.4105	1.61356	0.50317	3.20679	0.00134223	0.0132609
TCONS_00008423	82.0811	1.05638	0.32964	3.20465	0.00135229	0.0132998
TCONS_00013952	494.608	1.29726	0.404782	3.20483	0.00135143	0.0132998
TCONS_00014448	39.6495	1.98534	0.61953	3.20458	0.00135258	0.0132998
TCONS_00012937	290.859	-1.05744	0.330704	-3.19755	0.00138599	0.0136109
TCONS_00006504	843.874	-0.900762	0.282036	-3.19378	0.00140421	0.0137721
TCONS_00013445	115.064	1.14027	0.357096	3.19318	0.00140717	0.0137834
TCONS_00009078	169.714	1.29385	0.405388	3.19164	0.00141467	0.0138391
TCONS_00003985	135.989	1.14412	0.35914	3.18571	0.00144398	0.0141078
TCONS_00004246	30.9295	1.54788	0.486258	3.18324	0.00145637	0.0142107
TCONS_00005694	58.403	1.42875	0.44905	3.18172	0.00146401	0.0142659
TCONS_00007846	103.093	-1.14213	0.359005	-3.18138	0.00146575	0.0142659
TCONS_00014750	46.3315	1.74498	0.548645	3.18053	0.00147004	0.0142894
TCONS_00007708	795.201	1.41799	0.446134	3.1784	0.00148088	0.0143765
TCONS_00005620	143.059	-1.13393	0.356882	-3.17734	0.00148635	0.0144114
TCONS_00000939	1734.47	1.44674	0.455741	3.17448	0.00150104	0.0145354
TCONS_00003913	132.9	1.51363	0.476962	3.17349	0.00150616	0.014559
TCONS_00008963	142.532	1.40977	0.444264	3.17328	0.00150729	0.014559
TCONS_00006884	20.2801	1.75599	0.553767	3.17099	0.00151922	0.0146558
TCONS_00010961	17.3363	1.82382	0.575337	3.17	0.0015244	0.0146872
TCONS_00010436	13.1249	1.91481	0.60422	3.16906	0.0015293	0.014716
TCONS_00006613	45.7246	-1.19113	0.376001	-3.16789	0.0015355	0.014757
TCONS_00006208	576.254	1.50729	0.475877	3.1674	0.00153808	0.0147633
TCONS_00002066	9025.86	1.74653	0.551536	3.16667	0.00154197	0.0147821
TCONS_00010892	112.41	-1.01339	0.320149	-3.16536	0.00154892	0.0148301
TCONS_00009874	63.2791	1.46473	0.463333	3.16129	0.00157074	0.0150014
TCONS_00011707	63.2883	1.58836	0.502411	3.16147	0.00156976	0.0150014
TCONS_00003475	103.666	1.5289	0.483823	3.16004	0.0015775	0.0150472
TCONS_00002592	199.461	1.22523	0.387805	3.1594	0.00158093	0.0150612
TCONS_00005086	60.3958	-1.12621	0.356673	-3.15753	0.00159109	0.0151391
TCONS_00002419	707.947	1.47524	0.467509	3.15554	0.00160201	0.0152241
TCONS_00015336	59.9225	1.64715	0.522086	3.15494	0.00160533	0.0152367
TCONS_00000656	173.413	-0.975201	0.309258	-3.15336	0.00161403	0.0152832
TCONS_00014780	31.5852	-1.3689	0.434113	-3.15332	0.00161422	0.0152832
TCONS_00004763	320.19	-0.940195	0.298355	-3.15126	0.00162567	0.0153541
TCONS_00010054	57.9754	1.45932	0.463093	3.15124	0.00162579	0.0153541
TCONS_00014824	68.1602	1.6126	0.511791	3.15089	0.00162773	0.0153541
TCONS_00003959	15.4107	1.97617	0.627875	3.14739	0.00164736	0.0155176
TCONS_00004554	124.617	-0.986048	0.313322	-3.14707	0.00164913	0.0155176
TCONS_00004980	88.0431	1.22958	0.390789	3.14642	0.00165284	0.0155177
TCONS_00013568	91.1794	1.50308	0.477722	3.14635	0.0016532	0.0155177
TCONS_00010609	111.806	1.66762	0.530438	3.14385	0.00166742	0.0156321
TCONS_00011006	6.9718	2.22707	0.708524	3.14326	0.0016708	0.0156446
TCONS_00000668	37.8305	-1.29645	0.412547	-3.14254	0.00167486	0.0156549
TCONS_00001389	62.172	1.68146	0.535196	3.14176	0.00167936	0.0156549
TCONS_00006272	148.411	1.35178	0.43028	3.14163	0.00168009	0.0156549
TCONS_00009263	72.4047	-1.20106	0.38227	-3.1419	0.00167856	0.0156549
TCONS_00000887	127.549	1.66664	0.53092	3.13915	0.00169436	0.0156749
TCONS_00001264	123.494	1.31474	0.418799	3.13931	0.00169346	0.0156749
TCONS_00005197	141.419	-1.16755	0.371801	-3.14025	0.00168802	0.0156749
TCONS_00006170	171.388	-1.01322	0.322787	-3.13899	0.00169534	0.0156749
TCONS_00006820	127.209	-0.975999	0.310946	-3.13881	0.00169637	0.0156749
TCONS_00007419	150.351	-1.07154	0.341263	-3.13991	0.00168997	0.0156749
TCONS_00013613	24.8301	-1.53233	0.488193	-3.13877	0.00169658	0.0156749
TCONS_00004369	93.5067	1.35165	0.431063	3.13563	0.00171487	0.0157827
TCONS_00005368	1500.08	1.37623	0.438886	3.13573	0.00171427	0.0157827
TCONS_00010106	3.86203	-2.52808	0.806314	-3.13535	0.00171649	0.0157827
TCONS_00010176	26.1008	1.60917	0.513137	3.13595	0.001713	0.0157827
TCONS_00015654	5.91195	2.3108	0.737134	3.13484	0.00171947	0.0157911
TCONS_00007432	177.964	-1.08422	0.345942	-3.13412	0.00172372	0.0158111
TCONS_00002914	20.9913	1.54052	0.491591	3.13375	0.00172587	0.0158119
TCONS_00006632	104.319	1.59507	0.509105	3.13309	0.00172977	0.0158286
TCONS_00012009	23.8184	1.65252	0.527786	3.13104	0.00174189	0.0159205
TCONS_00004257	42.7975	1.20004	0.38333	3.13057	0.00174466	0.0159268
TCONS_00012457	81.4056	-1.18238	0.378098	-3.12716	0.00176501	0.0160934
TCONS_00011024	658.233	1.37459	0.4399	3.12477	0.00177943	0.0162055
TCONS_00010396	68.2793	1.31282	0.420348	3.12318	0.00178908	0.0162636
TCONS_00016544	29.1757	1.38264	0.442727	3.12302	0.00179006	0.0162636
TCONS_00010805	354.741	1.5777	0.505326	3.12215	0.00179534	0.0162922
TCONS_00014109	416.321	-0.842538	0.269975	-3.1208	0.00180362	0.0163286
TCONS_00016924	111.268	1.24717	0.399622	3.12086	0.00180322	0.0163286
TCONS_00003748	447.769	1.04244	0.334358	3.11773	0.0018225	0.0164025
TCONS_00004415	31.0824	1.6857	0.54059	3.11827	0.00181918	0.0164025
TCONS_00007784	82.8895	1.3047	0.418431	3.11808	0.00182036	0.0164025
TCONS_00010904	30.4784	1.67399	0.536921	3.11775	0.00182239	0.0164025
TCONS_00016125	10.5572	-2.15654	0.691425	-3.11898	0.0018148	0.0164025
TCONS_00001174	61.3242	1.38243	0.443683	3.11582	0.00183435	0.0164636
TCONS_00003995	84.677	-1.01629	0.326249	-3.11508	0.00183895	0.0164636
TCONS_00005703	203.948	1.41392	0.453719	3.11629	0.00183145	0.0164636
TCONS_00006965	178.697	-0.987176	0.316955	-3.11456	0.00184221	0.0164636
TCONS_00007896	7.37929	2.35755	0.756859	3.11491	0.00184003	0.0164636
TCONS_00011500	53.1376	-1.30319	0.418394	-3.11474	0.00184107	0.0164636
TCONS_00004843	27.6786	2.18039	0.70124	3.10933	0.00187512	0.0167371
TCONS_00010076	153.288	-0.911312	0.29312	-3.10901	0.00187719	0.0167371
TCONS_00014913	290.794	1.36489	0.439216	3.10755	0.00188644	0.0168
TCONS_00004663	37.5967	1.83719	0.591893	3.10393	0.00190971	0.0169875
TCONS_00009257	84.5589	-1.06931	0.344548	-3.10351	0.00191238	0.0169916
TCONS_00011694	154.5	1.41098	0.455017	3.10095	0.00192902	0.0171195
TCONS_00003503	121.311	-1.06884	0.344792	-3.09997	0.00193541	0.0171563
TCONS_00005905	353.243	0.908621	0.293149	3.09952	0.00193835	0.0171605
TCONS_00015401	59.5434	1.56725	0.505694	3.09921	0.00194038	0.0171605
TCONS_00005076	52.2309	1.64786	0.532215	3.09623	0.00196	0.0172941
TCONS_00013353	47.5892	-1.51874	0.49047	-3.09651	0.00195816	0.0172941
TCONS_00014311	88.2953	-1.08825	0.351522	-3.09581	0.00196274	0.0172984
TCONS_00001637	47.0868	1.77409	0.573401	3.09397	0.00197495	0.0173075
TCONS_00004058	10.8265	1.99321	0.644368	3.09327	0.00197962	0.0173075
TCONS_00007010	4.66012	2.45942	0.794812	3.09434	0.00197251	0.0173075
TCONS_00010150	6.91692	2.19818	0.71034	3.09454	0.00197117	0.0173075
TCONS_00014774	303.872	-0.803296	0.259673	-3.09349	0.00197816	0.0173075
TCONS_00016584	65.0409	1.63656	0.528987	3.09377	0.00197632	0.0173075
TCONS_00016799	10.4714	2.02113	0.653299	3.09374	0.00197652	0.0173075
TCONS_00016839	50.2437	-1.20891	0.391345	-3.08911	0.0020076	0.0175321
TCONS_00001889	205.913	1.27783	0.413786	3.08815	0.00201408	0.0175687
TCONS_00016998	64.8161	1.27297	0.41226	3.08777	0.00201663	0.0175709
TCONS_00010605	158.532	1.23672	0.400597	3.08718	0.00202063	0.0175857
TCONS_00007796	13.5899	1.78252	0.577527	3.08648	0.00202544	0.0176075
TCONS_00005060	79.0237	1.819	0.589577	3.08526	0.00203373	0.0176595
TCONS_00000787	14.1348	1.88994	0.61265	3.08486	0.0020365	0.0176635
TCONS_00005114	66.9826	-1.10129	0.357198	-3.08314	0.00204828	0.0177455
TCONS_00000567	24.635	1.53535	0.498159	3.08205	0.0020558	0.0177906
TCONS_00005285	309.142	1.38996	0.451232	3.08037	0.00206742	0.0178709
TCONS_00005218	247.158	0.987179	0.320927	3.07603	0.00209779	0.0180926
TCONS_00009838	222.858	1.67872	0.545734	3.07608	0.00209741	0.0180926
TCONS_00000019	76.0784	1.28792	0.418783	3.07538	0.00210233	0.0180944
TCONS_00001750	105.079	-0.989903	0.321886	-3.07533	0.00210273	0.0180944
TCONS_00014746	560.759	-1.07107	0.34845	-3.07381	0.00211346	0.0181663
TCONS_00004389	11.9514	1.84213	0.599662	3.07195	0.00212667	0.0182593
TCONS_00014748	41.1606	-1.53844	0.501047	-3.07044	0.0021374	0.0183308
TCONS_00004183	26.6788	1.50593	0.491031	3.06687	0.00216311	0.0185306
TCONS_00004365	64.8921	1.34181	0.437651	3.06595	0.00216983	0.0185673
TCONS_00003197	857.63	1.28559	0.419522	3.06442	0.00218094	0.0186208
TCONS_00003599	49.1512	1.37492	0.448646	3.06461	0.00217957	0.0186208
TCONS_00013732	63.8447	-1.08188	0.353187	-3.0632	0.00218984	0.0186759
TCONS_00011814	80.5915	1.28895	0.420833	3.06285	0.0021924	0.0186769
TCONS_00009252	116.381	1.49598	0.488777	3.06065	0.00220857	0.0187542
TCONS_00011890	41.0434	1.45469	0.475312	3.0605	0.00220969	0.0187542
TCONS_00012565	21.9824	1.59338	0.520666	3.06028	0.00221128	0.0187542
TCONS_00013888	19.0342	1.90879	0.623535	3.06124	0.00220422	0.0187542
TCONS_00003433	122.509	1.41613	0.462958	3.05886	0.00222178	0.0188189
TCONS_00010036	19.0961	1.81584	0.593687	3.05859	0.00222383	0.0188189
TCONS_00012586	157.326	1.07684	0.352191	3.05754	0.00223163	0.0188641
TCONS_00003821	329.331	-0.982193	0.321298	-3.05696	0.00223595	0.0188687
TCONS_00015676	34.788	1.68253	0.550422	3.0568	0.00223711	0.0188687
TCONS_00013933	8.44053	2.16123	0.707207	3.056	0.0022431	0.0188984
TCONS_00007942	877.22	-0.841548	0.275417	-3.05555	0.00224652	0.0189063
TCONS_00000524	81.535	1.33923	0.438676	3.05288	0.00226654	0.0190121
TCONS_00002540	93.4654	1.41781	0.464353	3.0533	0.00226338	0.0190121
TCONS_00010158	53.0754	1.30027	0.425875	3.05318	0.00226432	0.0190121
TCONS_00007200	20.5028	1.81338	0.59415	3.05205	0.00227283	0.0190439
TCONS_00010916	35.9517	1.30382	0.427327	3.0511	0.00228007	0.0190838
TCONS_00009860	39.1909	1.59025	0.521318	3.05044	0.00228507	0.0191047
TCONS_00010626	344.25	-0.816308	0.267891	-3.04717	0.00231011	0.0192929
TCONS_00001242	319.172	1.41426	0.464278	3.04615	0.00231794	0.0193161
TCONS_00010237	31.4239	1.40659	0.461733	3.04632	0.00231659	0.0193161
TCONS_00011079	37.8105	1.43967	0.472967	3.04391	0.00233524	0.0194392
TCONS_00004828	148.458	1.24879	0.410405	3.04283	0.00234367	0.0194718
TCONS_00005581	24.0734	1.74212	0.572547	3.04275	0.00234425	0.0194718
TCONS_00000606	29.6544	-1.37328	0.451504	-3.04156	0.00235359	0.0195282
TCONS_00007958	185.541	-0.913809	0.300494	-3.04103	0.00235772	0.0195413
TCONS_00005196	87.206	-1.12851	0.37115	-3.04058	0.00236127	0.0195495
TCONS_00016316	230.422	1.04075	0.342663	3.03723	0.00238759	0.019746
TCONS_00013550	96.1292	1.63502	0.538499	3.03624	0.00239546	0.0197897
TCONS_00000450	3889.5	0.990512	0.326612	3.03268	0.0024239	0.0200031
TCONS_00002426	251.217	1.31844	0.434798	3.03229	0.00242705	0.0200075
TCONS_00004411	55.5253	1.36612	0.450651	3.03144	0.00243388	0.0200422
TCONS_00004664	265.712	1.55575	0.513478	3.02984	0.00244684	0.0201239
TCONS_00008115	480.528	-0.892809	0.294699	-3.02957	0.00244906	0.0201239
TCONS_00003839	34.0833	1.9437	0.6419	3.02804	0.00246144	0.0202039
TCONS_00006180	224.841	1.29287	0.42709	3.02715	0.00246871	0.0202418
TCONS_00007065	63.6913	-1.06398	0.351518	-3.02681	0.00247147	0.0202428
TCONS_00001272	20.6523	1.44825	0.478671	3.02557	0.00248164	0.0203044
TCONS_00006365	65.394	-1.15411	0.381502	-3.02517	0.00248492	0.0203094
TCONS_00009421	131.593	1.58362	0.523628	3.02431	0.00249198	0.0203454
TCONS_00007573	27.4997	1.76305	0.583113	3.0235	0.00249866	0.0203782
TCONS_00011521	532.799	1.05636	0.349495	3.02253	0.0025067	0.020422
TCONS_00005917	117.423	1.46861	0.486907	3.0162	0.00255964	0.0208311
TCONS_00000953	210.086	-0.861277	0.285927	-3.01223	0.00259338	0.0210833
TCONS_00002808	276.388	1.74655	0.580045	3.01106	0.00260339	0.0211197
TCONS_00010049	97.978	-0.986184	0.327501	-3.01124	0.00260182	0.0211197
TCONS_00011441	1325.16	1.24908	0.415008	3.00978	0.0026144	0.0211642
TCONS_00012720	329.643	-0.893363	0.296814	-3.00984	0.00261383	0.0211642
TCONS_00012535	28.7299	1.31581	0.437568	3.00709	0.00263762	0.0213296
TCONS_00010313	96.5661	1.36127	0.453504	3.00168	0.00268492	0.0216772
TCONS_00016894	5.10427	-2.34836	0.782387	-3.00153	0.00268628	0.0216772
TCONS_00008968	13.8157	-1.94867	0.649379	-3.00083	0.00269245	0.0216813
TCONS_00010324	196.973	1.28901	0.429511	3.00111	0.00269	0.0216813
TCONS_00000157	54.7447	1.10844	0.369501	2.99983	0.00270128	0.0217296
TCONS_00011528	83.6974	1.76326	0.588495	2.99622	0.00273347	0.0219654
TCONS_00011889	17.2937	1.83976	0.614371	2.99454	0.00274858	0.0220436
TCONS_00014265	45.2661	-1.15331	0.385144	-2.9945	0.00274897	0.0220436
TCONS_00001040	11.0737	2.16164	0.722092	2.99357	0.0027573	0.0220873
TCONS_00000084	947.781	1.21532	0.406128	2.99246	0.00276738	0.0221448
TCONS_00008407	28.2522	1.97684	0.660719	2.99196	0.00277197	0.0221584
TCONS_00001911	176.7	1.49871	0.501294	2.98969	0.00279261	0.0222155
TCONS_00003626	265.684	1.42652	0.477213	2.98928	0.00279631	0.0222155
TCONS_00004541	312.878	-0.876444	0.293197	-2.98926	0.00279653	0.0222155
TCONS_00012165	188.045	1.20087	0.401646	2.98987	0.00279095	0.0222155
TCONS_00013205	244.767	-1.17328	0.392444	-2.98967	0.00279283	0.0222155
TCONS_00014607	5.55843	2.21924	0.742155	2.99027	0.00278735	0.0222155
TCONS_00009967	238.349	-0.90827	0.303911	-2.98861	0.00280249	0.0222397
TCONS_00005223	168.506	-1.02819	0.344128	-2.98781	0.0028098	0.0222746
TCONS_00000218	281.832	1.33045	0.445814	2.98432	0.00284209	0.022484
TCONS_00007763	36.3142	-1.26067	0.42241	-2.98447	0.00284073	0.022484
TCONS_00007125	27.9744	1.58375	0.531031	2.9824	0.00285998	0.0226021
TCONS_00000435	11.2402	1.89048	0.634141	2.98116	0.00287158	0.022647
TCONS_00007611	72.877	-1.07567	0.360809	-2.98128	0.00287045	0.022647
TCONS_00000762	64.2563	1.23841	0.415514	2.98044	0.00287835	0.022677
TCONS_00015242	4.92504	-2.32711	0.780881	-2.98011	0.00288147	0.0226782
TCONS_00005269	47.5493	1.35011	0.453365	2.97799	0.00290146	0.0228121
TCONS_00006409	150.355	-0.881701	0.296147	-2.97724	0.00290857	0.0228445
TCONS_00007932	4.62345	2.32305	0.78044	2.97659	0.00291475	0.0228696
TCONS_00003356	60.4433	1.28274	0.431216	2.97471	0.0029327	0.0229868
TCONS_00007104	101.706	1.37913	0.463766	2.97377	0.00294162	0.023013
TCONS_00013317	78.8893	-1.14962	0.386592	-2.97373	0.00294205	0.023013
TCONS_00009115	785.034	-0.84706	0.284879	-2.9734	0.00294521	0.0230141
TCONS_00011197	45.2544	1.41222	0.475127	2.97229	0.00295583	0.0230736
TCONS_00004244	200.942	1.58033	0.532386	2.9684	0.00299353	0.023344
TCONS_00014571	16.047	-1.78967	0.603097	-2.96746	0.00300269	0.0233916
TCONS_00016518	3839.43	-0.836163	0.281844	-2.96676	0.0030096	0.0234216
TCONS_00003154	185.518	-0.923031	0.311547	-2.96273	0.00304923	0.0237059
TCONS_00004785	7.54993	2.12983	0.719105	2.96178	0.0030587	0.0237402
TCONS_00013428	317.049	-0.814444	0.274996	-2.96166	0.00305985	0.0237402
TCONS_00006880	18.6032	1.51255	0.511235	2.95862	0.00309019	0.0239513
TCONS_00000107	60.9582	-1.21512	0.410848	-2.95759	0.00310055	0.0239878
TCONS_00002071	70.7564	1.70439	0.576288	2.95753	0.00310117	0.0239878
TCONS_00008120	4809.87	1.61446	0.546029	2.95673	0.00310919	0.0240013
TCONS_00014205	148.037	-0.942692	0.318805	-2.95695	0.00310696	0.0240013
TCONS_00003687	64.6296	1.47876	0.500396	2.95517	0.00312493	0.0240951
TCONS_00011931	7.17316	-2.09935	0.710462	-2.95491	0.00312764	0.0240951
TCONS_00006484	8.01456	2.03088	0.687433	2.95429	0.00313392	0.0241192
TCONS_00013461	26.9726	1.34595	0.455933	2.95209	0.0031563	0.0242671
TCONS_00014440	1552.07	-0.858359	0.290907	-2.95063	0.00317126	0.0243576
TCONS_00007984	1261.25	1.35403	0.459174	2.94884	0.00318965	0.024432
TCONS_00012381	26.0867	1.48697	0.504168	2.94936	0.00318432	0.024432
TCONS_00014350	460.443	-1.41827	0.480973	-2.94876	0.00319054	0.024432
TCONS_00006505	49.7794	1.79001	0.607782	2.94515	0.00322793	0.0246696
TCONS_00016514	40.8449	-1.30013	0.441448	-2.94515	0.00322801	0.0246696
TCONS_00008233	195.603	-0.913546	0.31026	-2.94445	0.00323532	0.0247008
TCONS_00016437	14.0622	-1.93905	0.65916	-2.94169	0.00326422	0.0248966
TCONS_00010495	117.772	-1.0412	0.354125	-2.9402	0.00328003	0.0249923
TCONS_00004588	2494.23	1.24381	0.423089	2.93984	0.00328384	0.0249964
TCONS_00005862	11.5601	1.95281	0.664355	2.93941	0.00328837	0.025006
TCONS_00004822	233.105	-0.953719	0.324538	-2.9387	0.00329594	0.0250387
TCONS_00015831	54.6922	-1.21511	0.413537	-2.93833	0.00329986	0.0250436
TCONS_00005999	106.298	1.45507	0.495433	2.93697	0.00331434	0.0251285
TCONS_00005049	213.39	-1.02276	0.348343	-2.93607	0.00332396	0.0251765
TCONS_00012338	5.85229	2.12886	0.725483	2.9344	0.00334197	0.0252879
TCONS_00001548	16.5058	1.60765	0.548073	2.93327	0.00335409	0.0253296
TCONS_00005497	14.8003	1.77684	0.605752	2.93327	0.0033541	0.0253296
TCONS_00003437	54.3408	1.5108	0.515312	2.93182	0.00336985	0.0253984
TCONS_00015598	68.4899	1.21836	0.415539	2.93201	0.00336777	0.0253984
TCONS_00016682	27.801	1.66519	0.568035	2.93149	0.00337339	0.0254001
TCONS_00013766	68.592	1.53985	0.525475	2.93039	0.0033854	0.0254654
TCONS_00011695	37.0239	1.27097	0.435058	2.92138	0.00348484	0.0261669
TCONS_00015832	27.9763	1.49227	0.510819	2.92132	0.0034855	0.0261669
TCONS_00003632	893.641	-0.779659	0.266978	-2.92031	0.00349685	0.0261926
TCONS_00004639	45.0079	1.43135	0.490172	2.9201	0.0034992	0.0261926
TCONS_00010069	127.037	1.25406	0.429385	2.92059	0.00349366	0.0261926
TCONS_00013279	55.0895	-1.07005	0.366681	-2.91821	0.00352043	0.0263258
TCONS_00007897	82.4159	1.41561	0.485531	2.9156	0.00355003	0.0265212
TCONS_00003007	146.224	-0.912708	0.313268	-2.91351	0.00357391	0.0266736
TCONS_00009363	20.4677	1.6069	0.551638	2.91296	0.00358018	0.0266943
TCONS_00003758	17.8104	1.66002	0.570169	2.91146	0.00359748	0.0267711
TCONS_00010451	11.7138	1.9711	0.676999	2.91152	0.00359675	0.0267711
TCONS_00005983	115.862	-0.893399	0.307086	-2.90928	0.00362258	0.0269109
TCONS_00012308	37.772	1.41355	0.485888	2.90922	0.00362329	0.0269109
TCONS_00015496	23.2451	1.64939	0.567191	2.908	0.00363751	0.0269902
TCONS_00006022	8.87021	1.93941	0.667005	2.90764	0.00364168	0.026995
TCONS_00011559	57.5214	1.34281	0.461876	2.9073	0.00364558	0.0269978
TCONS_00009314	71.6447	1.23525	0.425028	2.90627	0.00365761	0.0270345
TCONS_00013254	70.4294	-1.01526	0.349306	-2.90649	0.00365505	0.0270345
TCONS_00003963	108.102	1.57736	0.543105	2.90434	0.00368024	0.0271658
TCONS_00014230	227.633	1.04496	0.359817	2.90415	0.00368248	0.0271658
TCONS_00012663	54.96	1.1524	0.397208	2.90126	0.00371668	0.0273917
TCONS_00003974	26.4903	1.43932	0.496484	2.89903	0.00374319	0.0275162
TCONS_00009728	318.605	1.42411	0.491175	2.8994	0.00373878	0.0275162
TCONS_00012908	104.41	1.30525	0.450253	2.89893	0.00374437	0.0275162
TCONS_00002323	18.1409	1.64601	0.568003	2.89788	0.00375691	0.027575
TCONS_00014863	91.166	1.21215	0.41832	2.89766	0.00375957	0.027575
TCONS_00013000	130.381	-1.0215	0.35264	-2.89673	0.00377069	0.02763
TCONS_00014541	34.4068	1.75145	0.605001	2.89495	0.00379221	0.0277611
TCONS_00008674	23.5277	1.46571	0.50661	2.89317	0.00381377	0.0278923
TCONS_00008490	26.2487	1.60508	0.555011	2.89198	0.00382826	0.0279715
TCONS_00015528	176.228	-1.0838	0.374812	-2.89157	0.00383318	0.0279808
TCONS_00010758	339.69	-0.842879	0.291526	-2.89127	0.00383692	0.0279814
TCONS_00007643	17.8186	2.18173	0.754903	2.89008	0.00385142	0.0280603
TCONS_00003237	34.8272	1.38404	0.47895	2.88973	0.00385567	0.0280646
TCONS_00016601	21.5065	1.67198	0.578745	2.88897	0.00386503	0.028106
TCONS_00011000	67.0267	1.5093	0.522569	2.88824	0.0038741	0.0281452
TCONS_00014438	284.946	-0.786124	0.272321	-2.88675	0.00389239	0.0282512
TCONS_00009879	195.168	-0.91334	0.31657	-2.88511	0.00391272	0.0283719
TCONS_00007071	187.571	-0.877272	0.304107	-2.88474	0.00391732	0.0283783
TCONS_00004448	53.7136	-1.197	0.415338	-2.88198	0.00395184	0.0285203
TCONS_00007900	144.179	1.4193	0.492415	2.88233	0.00394751	0.0285203
TCONS_00008575	116.078	-0.920377	0.319322	-2.88228	0.00394809	0.0285203
TCONS_00009300	6.1215	2.19935	0.763134	2.88199	0.0039517	0.0285203
TCONS_00004696	106.564	0.927467	0.322028	2.88008	0.0039757	0.0286655
TCONS_00003352	115.421	-0.918473	0.319123	-2.87811	0.0040006	0.0287881
TCONS_00009481	23.2869	-1.38274	0.480446	-2.87803	0.00400162	0.0287881
TCONS_00014490	172.585	1.03203	0.358613	2.87785	0.00400399	0.0287881
TCONS_00007282	256.45	0.806805	0.28047	2.87662	0.00401962	0.0288733
TCONS_00011785	11.6123	1.84563	0.642926	2.87068	0.00409588	0.0293935
TCONS_00001563	590.187	1.06643	0.37164	2.86953	0.0041108	0.029473
TCONS_00013995	1106.64	-0.972912	0.339191	-2.86833	0.00412646	0.0295575
TCONS_00008557	25.0732	-1.52769	0.533144	-2.86543	0.00416439	0.0298013
TCONS_00010922	35439.4	1.58198	0.552225	2.86473	0.00417365	0.0298396
TCONS_00009890	99.4457	0.965172	0.336954	2.86441	0.00417793	0.0298424
TCONS_00014020	292.57	-0.842617	0.294235	-2.86376	0.00418645	0.0298753
TCONS_00003257	779.061	1.23664	0.432176	2.86143	0.00421732	0.0300676
TCONS_00005156	13.768	1.92194	0.671908	2.86042	0.00423086	0.030136
TCONS_00001075	87.7893	1.11194	0.388945	2.85886	0.00425165	0.0302559
TCONS_00011925	18.403	1.67716	0.586986	2.85725	0.00427335	0.0303257
TCONS_00014991	24.0368	1.7118	0.599079	2.85739	0.00427139	0.0303257
TCONS_00016110	66.4154	-1.22026	0.42701	-2.85768	0.00426745	0.0303257
TCONS_00002381	60.7833	1.48828	0.521035	2.8564	0.00428477	0.0303786
TCONS_00005963	16.1612	1.67133	0.585368	2.85518	0.00430128	0.0304674
TCONS_00000112	4.6573	2.17614	0.762348	2.85452	0.00431015	0.0304749
TCONS_00010638	59.0264	1.66887	0.584643	2.85451	0.00431031	0.0304749
TCONS_00015822	402.04	-0.718721	0.251915	-2.85304	0.00433038	0.0305886
TCONS_00009810	193.57	0.850966	0.298461	2.85118	0.00435567	0.0307388
TCONS_00005087	160.454	1.6576	0.581775	2.84922	0.00438264	0.0308722
TCONS_00015339	33.534	1.24607	0.437294	2.8495	0.00437879	0.0308722
TCONS_00007972	76.7172	-0.999717	0.351071	-2.84762	0.00440471	0.0309948
TCONS_00009804	71.7076	-0.951131	0.334068	-2.84712	0.00441172	0.0309948
TCONS_00016942	19.4208	1.51754	0.533016	2.84708	0.00441221	0.0309948
TCONS_00000944	11.1457	1.9615	0.68906	2.84663	0.00441845	0.0310102
TCONS_00003245	40.6278	1.26631	0.445159	2.84463	0.00444634	0.0311223
TCONS_00012952	4.39976	-2.22412	0.781874	-2.84461	0.00444663	0.0311223
TCONS_00015571	21.074	-1.50966	0.530652	-2.84492	0.00444229	0.0311223
TCONS_00009482	34.6767	1.19559	0.420515	2.84315	0.00446695	0.0312075
TCONS_00012169	87.8936	1.07317	0.377426	2.84338	0.00446385	0.0312075
TCONS_00007214	141.172	1.69808	0.597406	2.84242	0.00447729	0.0312512
TCONS_00007238	756.401	1.27761	0.449534	2.84208	0.00448196	0.0312552
TCONS_00013593	24.9432	1.63248	0.574602	2.84106	0.00449644	0.0313276
TCONS_00006629	119.659	1.22723	0.432173	2.83967	0.00451605	0.0314071
TCONS_00013138	504.269	-0.750337	0.264224	-2.83977	0.00451457	0.0314071
TCONS_00002490	84.916	-0.968488	0.341206	-2.83842	0.00453373	0.0315014
TCONS_00006397	226.728	-0.904735	0.318847	-2.83752	0.00454649	0.0315614
TCONS_00016652	117.991	-0.953766	0.336172	-2.83714	0.00455199	0.0315709
TCONS_00014284	42.4882	1.30209	0.459066	2.83639	0.00456272	0.0316167
TCONS_00007554	80.6728	-1.00397	0.354169	-2.83473	0.00458641	0.031752
TCONS_00001632	94.8033	1.11068	0.391891	2.83415	0.00459477	0.0317812
TCONS_00002972	127	-0.841633	0.297002	-2.83377	0.00460028	0.0317905
TCONS_00004879	35.8754	1.37407	0.485071	2.83271	0.00461554	0.0318672
TCONS_00009668	109.441	-0.878735	0.310242	-2.83241	0.00461979	0.0318678
TCONS_00004909	73.9263	-1.14727	0.405216	-2.83124	0.00463673	0.031927
TCONS_00009198	108.145	-1.03823	0.36669	-2.83137	0.00463496	0.031927
TCONS_00000516	7421.82	1.2191	0.430885	2.82928	0.00466526	0.0320946
TCONS_00006218	29.9022	1.18539	0.419358	2.82668	0.0047033	0.0323273
TCONS_00014972	69.1066	1.38839	0.491412	2.82531	0.00472349	0.0324369
TCONS_00005042	53.2557	1.17549	0.416105	2.825	0.0047281	0.0324394
TCONS_00001407	17.8269	1.57525	0.557979	2.82314	0.00475553	0.0325692
TCONS_00009727	157.227	1.258	0.44556	2.82341	0.00475162	0.0325692
TCONS_00006369	39.1089	1.18817	0.421143	2.82131	0.00478287	0.0327271
TCONS_00009055	186.267	-0.913877	0.323968	-2.82089	0.00478907	0.0327403
TCONS_00003668	85.0437	1.20435	0.427087	2.81992	0.00480361	0.0327772
TCONS_00009072	2587.18	1.37273	0.486842	2.81967	0.00480733	0.0327772
TCONS_00009480	11.1755	-1.84205	0.653204	-2.82003	0.00480194	0.0327772
TCONS_00006871	204.36	1.28554	0.456244	2.81766	0.00483747	0.032924
TCONS_00012839	15.9043	1.66227	0.589921	2.81778	0.00483562	0.032924
TCONS_00001903	43.2525	1.24055	0.440581	2.81572	0.00486677	0.0330646
TCONS_00011326	221.619	-1.30241	0.462527	-2.81587	0.00486458	0.0330646
TCONS_00001078	131.477	0.964631	0.342655	2.81517	0.00487518	0.0330924
TCONS_00006019	262.469	-0.85279	0.303161	-2.813	0.00490819	0.0332574
TCONS_00015755	6986.03	1.26931	0.451191	2.81324	0.00490456	0.0332574
TCONS_00002091	237.274	-0.928116	0.33005	-2.81205	0.00492273	0.0333265
TCONS_00005203	515.736	1.06294	0.378055	2.81159	0.00492969	0.033344
TCONS_00002233	80.826	0.994243	0.353751	2.81057	0.00494538	0.0334206
TCONS_00000463	19.9286	1.55585	0.553875	2.80902	0.00496921	0.0335227
TCONS_00008914	9.10615	1.93596	0.689194	2.80902	0.00496925	0.0335227
TCONS_00007400	15.7705	1.87557	0.66789	2.80821	0.0049818	0.0335778
TCONS_00003906	66.9729	1.17559	0.419204	2.80435	0.00504177	0.0339521
TCONS_00007168	85.254	1.15502	0.411958	2.80372	0.00505164	0.0339886
TCONS_00006381	30.0475	1.39238	0.496897	2.80215	0.00507634	0.0340415
TCONS_00009409	47.086	1.31593	0.469624	2.80209	0.00507731	0.0340415
TCONS_00013104	513.844	1.15289	0.411326	2.80285	0.00506526	0.0340415
TCONS_00015351	71.6777	1.38823	0.495372	2.80241	0.00507227	0.0340415
TCONS_00002418	63.9531	-1.05779	0.377828	-2.79965	0.0051158	0.0342578
TCONS_00007249	6.24491	2.20608	0.788032	2.79948	0.00511852	0.0342578
TCONS_00004731	623.848	1.11563	0.39866	2.79846	0.00513466	0.0343358
TCONS_00000861	285.016	1.26768	0.453107	2.79776	0.0051459	0.0343809
TCONS_00006434	237.537	-0.820002	0.293318	-2.79561	0.00518026	0.0345803
TCONS_00003354	7.51706	1.86664	0.668167	2.79368	0.00521125	0.0347568
TCONS_00001003	160.091	1.04928	0.375786	2.79224	0.00523446	0.0348508
TCONS_00001036	149.481	1.10029	0.394042	2.79232	0.00523323	0.0348508
TCONS_00000674	37.1	1.67027	0.598253	2.79192	0.00523965	0.0348551
TCONS_00015150	403.029	-1.08685	0.389386	-2.7912	0.00525135	0.0349025
TCONS_00000662	686.201	-0.742186	0.266126	-2.78885	0.00528951	0.0350648
TCONS_00003840	27.822	1.78613	0.640333	2.78937	0.00528101	0.0350648
TCONS_00007740	77.8911	1.78257	0.639133	2.78903	0.00528654	0.0350648
TCONS_00002724	53.0379	1.23109	0.441576	2.78795	0.00530434	0.0351326
TCONS_00003686	19.1923	1.59502	0.572239	2.78733	0.0053145	0.0351695
TCONS_00005431	379.474	-0.830265	0.297959	-2.7865	0.005328	0.0351979
TCONS_00006109	141.531	-0.981454	0.352209	-2.78656	0.00532701	0.0351979
TCONS_00013574	13.0232	-1.65008	0.592607	-2.78444	0.00536204	0.0353922
TCONS_00007630	198.431	-0.882313	0.316976	-2.78353	0.00537711	0.0354001
TCONS_00012393	85.311	1.33277	0.478798	2.78359	0.00537617	0.0354001
TCONS_00014638	3.81513	2.24806	0.807576	2.78372	0.00537397	0.0354001
TCONS_00014200	5.74486	-2.11292	0.759354	-2.78253	0.00539376	0.03547
TCONS_00014517	280.949	-0.810886	0.291441	-2.78233	0.005397	0.03547
TCONS_00006204	25.2191	1.75846	0.632118	2.78185	0.00540502	0.0354922
TCONS_00000958	97.8994	-0.890383	0.320111	-2.78148	0.00541116	0.035502
TCONS_00004152	51.4369	1.42175	0.511294	2.78069	0.00542436	0.0355581
TCONS_00001897	103.703	-0.932895	0.335652	-2.77935	0.0054468	0.0356613
TCONS_00012893	199.837	0.844651	0.30392	2.77919	0.00544942	0.0356613
TCONS_00011190	21.2664	1.55833	0.561001	2.77777	0.00547333	0.0357872
TCONS_00007144	17.6356	1.75602	0.632492	2.77636	0.00549716	0.0359123
TCONS_00000711	944.071	1.0054	0.362431	2.77404	0.00553643	0.0361071
TCONS_00009692	106.738	-0.95865	0.345571	-2.77411	0.00553536	0.0361071
TCONS_00004190	95.1801	1.18532	0.427406	2.77329	0.00554919	0.0361595
TCONS_00001601	151.817	-0.915472	0.330158	-2.77283	0.0055572	0.0361809
TCONS_00003556	324.143	1.10355	0.398254	2.77097	0.00558904	0.0362183
TCONS_00007140	16.2816	1.86459	0.672893	2.771	0.00558844	0.0362183
TCONS_00008857	435.703	-0.793851	0.28636	-2.77221	0.00556774	0.0362183
TCONS_00009537	81.8258	1.25755	0.453854	2.77083	0.00559134	0.0362183
TCONS_00009573	13.622	1.70298	0.61461	2.77083	0.00559135	0.0362183
TCONS_00014611	140.46	1.46634	0.529042	2.77169	0.00557653	0.0362183
TCONS_00000345	560.324	1.51322	0.546398	2.76944	0.00561521	0.0363421
TCONS_00000297	6.67072	1.94841	0.703865	2.76816	0.00563737	0.036402
TCONS_00002119	81.3064	-0.985707	0.356098	-2.76808	0.00563874	0.036402
TCONS_00015639	5.13742	-2.12208	0.76655	-2.76835	0.00563402	0.036402
TCONS_00000736	120.638	1.44617	0.522861	2.76588	0.00567702	0.0364669
TCONS_00007079	135.318	1.13416	0.410097	2.76558	0.00568217	0.0364669
TCONS_00007486	32.7549	1.13913	0.41165	2.76722	0.00565368	0.0364669
TCONS_00008538	31.2663	1.24545	0.450206	2.7664	0.00566792	0.0364669
TCONS_00012934	62.6846	1.38928	0.502311	2.76577	0.0056789	0.0364669
TCONS_00015198	140.478	1.23097	0.445064	2.76583	0.00567784	0.0364669
TCONS_00015955	1310.54	-0.793158	0.28677	-2.76583	0.00567774	0.0364669
TCONS_00002019	17.1154	1.75657	0.635562	2.76381	0.00571311	0.0365484
TCONS_00007804	30.7716	1.67454	0.605781	2.76426	0.00570525	0.0365484
TCONS_00009371	154.712	-0.99329	0.359398	-2.76376	0.00571397	0.0365484
TCONS_00009781	221.564	-0.878728	0.317862	-2.7645	0.00570109	0.0365484
TCONS_00008215	6.66908	2.15379	0.779827	2.76188	0.00574692	0.0367284
TCONS_00003903	130.156	1.28985	0.4671	2.76141	0.00575531	0.0367514
TCONS_00010408	6.44256	2.22988	0.807824	2.76036	0.00577375	0.0368383
TCONS_00016086	22.7711	1.4236	0.51584	2.75977	0.00578415	0.036874
TCONS_00003536	55.5349	1.08684	0.393869	2.75939	0.005791	0.0368869
TCONS_00009930	133.623	1.07896	0.391341	2.75708	0.00583194	0.0370859
TCONS_00016314	98.7263	-0.973134	0.352931	-2.7573	0.00582817	0.0370859
TCONS_00005050	71.5153	-0.972541	0.352809	-2.75657	0.0058412	0.0371139
TCONS_00001423	59.1222	1.42505	0.517218	2.75522	0.00586532	0.0372362
TCONS_00011425	21.3316	-1.53037	0.555734	-2.75378	0.00589106	0.0373377
TCONS_00015047	164.64	-0.855385	0.310595	-2.75402	0.00588677	0.0373377
TCONS_00014613	107.769	-1.07073	0.389024	-2.75235	0.00591693	0.0374707
TCONS_00010781	19.9788	-1.43713	0.522215	-2.75199	0.00592349	0.0374811
TCONS_00001551	257.278	-0.835086	0.303603	-2.75059	0.00594884	0.0375836
TCONS_00013583	9.84822	1.9517	0.709569	2.75055	0.00594951	0.0375836
TCONS_00001326	7.82619	1.97865	0.71961	2.74961	0.00596657	0.0376603
TCONS_00015969	90.1533	1.16081	0.42256	2.74708	0.00601283	0.037921
TCONS_00005568	79.1543	1.03306	0.37618	2.74619	0.00602925	0.0379932
TCONS_00016051	26.9848	1.28152	0.467065	2.74377	0.00607374	0.0382421
TCONS_00016154	62.5388	1.04919	0.382465	2.74323	0.00608371	0.0382734
TCONS_00007690	30.3041	1.35395	0.493968	2.74096	0.00612603	0.0384732
TCONS_00010929	15.5154	1.7942	0.654647	2.74071	0.00613057	0.0384732
TCONS_00015343	40.9507	-1.14811	0.41889	-2.74083	0.00612834	0.0384732
TCONS_00002239	132.487	1.50941	0.55084	2.7402	0.00614014	0.0385017
TCONS_00011508	234.962	1.10479	0.40332	2.73924	0.00615806	0.0385319
TCONS_00012194	163.759	-0.842674	0.307642	-2.73914	0.00616007	0.0385319
TCONS_00012492	8.73913	1.80557	0.659163	2.73919	0.00615909	0.0385319
TCONS_00001100	56.8883	1.25057	0.456757	2.73794	0.00618257	0.0386411
TCONS_00002660	81.7152	-0.93436	0.341414	-2.73673	0.00620525	0.0387511
TCONS_00007736	52.0951	1.32828	0.485641	2.73511	0.00623592	0.0389109
TCONS_00003158	30.9748	1.41152	0.516269	2.73407	0.00625565	0.0390022
TCONS_00001468	14.7318	1.83126	0.670416	2.73153	0.00630411	0.0392649
TCONS_00004269	7.81968	2.03	0.743228	2.73132	0.00630805	0.0392649
TCONS_00005019	382.871	-0.894488	0.327697	-2.72962	0.00634075	0.0394364
TCONS_00012394	24.3316	1.52715	0.559714	2.72845	0.00636334	0.0395447
TCONS_00012311	222.983	1.60395	0.588136	2.72717	0.006388	0.0396657
TCONS_00008222	13.2203	1.67319	0.614594	2.72243	0.00648038	0.0401742
TCONS_00016897	976.382	-0.902755	0.331568	-2.72269	0.00647533	0.0401742
TCONS_00003195	38.6233	1.18123	0.434118	2.72098	0.00650878	0.0403176
TCONS_00009102	18.1872	1.35532	0.498205	2.7204	0.00652022	0.0403231
TCONS_00013754	42.2668	1.46057	0.536878	2.72048	0.00651865	0.0403231
TCONS_00004049	99.6004	-1.03896	0.382072	-2.71927	0.00654269	0.0404294
TCONS_00001758	390.786	-0.775835	0.285375	-2.71865	0.00655492	0.0404396
TCONS_00013415	141.126	-0.972745	0.357803	-2.71866	0.0065547	0.0404396
TCONS_00005170	477.641	-0.7708	0.28361	-2.71782	0.00657144	0.0405089
TCONS_00006099	74.9673	-0.917479	0.337695	-2.71688	0.00658999	0.0405735
TCONS_00007141	17.1044	1.59881	0.588788	2.71543	0.00661905	0.0405735
TCONS_00009831	9.52318	1.88288	0.69322	2.71613	0.00660491	0.0405735
TCONS_00011894	26.7431	1.41651	0.521506	2.71619	0.00660383	0.0405735
TCONS_00013406	316.055	1.20207	0.442673	2.71548	0.00661791	0.0405735
TCONS_00013831	138.979	1.06406	0.391697	2.71655	0.00659663	0.0405735
TCONS_00015721	86.6254	-1.25886	0.46356	-2.71564	0.00661487	0.0405735
TCONS_00008901	274.007	1.27307	0.469154	2.71354	0.00665694	0.0407731
TCONS_00007860	226.362	-0.864866	0.318877	-2.71223	0.00668328	0.0409017
TCONS_00001749	95.6538	-0.927809	0.342142	-2.71177	0.00669251	0.0409254
TCONS_00008540	16.3671	1.5095	0.557196	2.7091	0.00674657	0.0412051
TCONS_00010509	42.2033	1.37024	0.505815	2.70898	0.00674901	0.0412051
TCONS_00005537	25.2854	1.41667	0.523113	2.70815	0.00676604	0.0412761
TCONS_00016136	99.1212	-1.06443	0.393132	-2.70755	0.00677809	0.0413167
TCONS_00001090	216.15	1.00819	0.372829	2.70415	0.00684788	0.0416756
TCONS_00005447	7.81856	-1.84598	0.682639	-2.70418	0.00684722	0.0416756
TCONS_00008076	101.148	1.21986	0.451162	2.70382	0.00685482	0.0416847
TCONS_00011300	214.772	1.60943	0.595681	2.70184	0.00689573	0.0419002
TCONS_00007404	109.015	-0.888235	0.328879	-2.7008	0.00691739	0.0419984
TCONS_00007167	7.75736	1.89133	0.700499	2.69998	0.00693439	0.0420683
TCONS_00006442	76.1254	1.04257	0.386271	2.69906	0.00695357	0.0421178
TCONS_00016560	8.46508	1.78177	0.660139	2.69908	0.00695313	0.0421178
TCONS_00008496	9.86797	1.82563	0.676602	2.69823	0.00697098	0.0421899
TCONS_00008518	2225.94	-0.819388	0.303822	-2.69693	0.00699816	0.0422874
TCONS_00012672	281.471	-0.934774	0.346579	-2.69714	0.00699372	0.0422874
TCONS_00006391	197.07	-0.796283	0.295465	-2.69502	0.00703854	0.0424979
TCONS_00015713	130.47	1.09972	0.408207	2.69403	0.00705945	0.0425906
TCONS_00003256	95.8761	1.28168	0.475816	2.69365	0.00706747	0.0426053
TCONS_00007341	120.062	0.954665	0.354649	2.69186	0.00710547	0.0427579
TCONS_00010806	174.683	1.25916	0.467765	2.69185	0.00710561	0.0427579
TCONS_00012929	55.1876	1.32634	0.492756	2.69167	0.00710954	0.0427579
TCONS_00006203	182.276	-0.805599	0.299364	-2.69104	0.00712298	0.042805
TCONS_00006486	7.68046	2.02348	0.752085	2.6905	0.0071346	0.0428412
TCONS_00011076	86.7435	1.3261	0.493042	2.68963	0.00715311	0.0429187
TCONS_00016745	82.3597	-0.937291	0.348523	-2.68933	0.00715966	0.0429243
TCONS_00002900	168.316	1.25544	0.466975	2.68845	0.00717852	0.0430036
TCONS_00000727	55.2685	1.21882	0.453481	2.68769	0.00719482	0.0430676
TCONS_00011537	572.917	0.68398	0.254588	2.68661	0.00721807	0.043173
TCONS_00005089	34.7345	1.6738	0.62327	2.68552	0.00724171	0.0432544
TCONS_00015852	70.6273	1.57297	0.585735	2.68546	0.00724299	0.0432544
TCONS_00015243	238.053	-1.61167	0.600429	-2.6842	0.0072703	0.0433836
TCONS_00005194	46.2545	-1.09182	0.406919	-2.68313	0.00729365	0.0434511
TCONS_00012053	197.98	1.47348	0.549187	2.68302	0.00729605	0.0434511
TCONS_00015844	27.457	-1.29602	0.483065	-2.6829	0.00729865	0.0434511
TCONS_00012757	527.406	1.39374	0.519782	2.68139	0.00733164	0.0436136
TCONS_00004952	658.912	1.57818	0.589125	2.67886	0.00738743	0.0438436
TCONS_00007968	38.0384	1.29608	0.483733	2.67933	0.00737698	0.0438436
TCONS_00013485	33.7892	-1.26773	0.473235	-2.67885	0.0073875	0.0438436
TCONS_00003394	39.9301	1.28155	0.47848	2.67839	0.00739781	0.0438707
TCONS_00012043	187.533	1.04774	0.391264	2.67783	0.00741018	0.04391
TCONS_00007316	76.3419	1.32654	0.495546	2.67693	0.00742997	0.0439932
TCONS_00004314	23.0468	1.41657	0.529365	2.67598	0.00745103	0.0440497
TCONS_00004440	55.7211	1.21017	0.452226	2.67602	0.00745027	0.0440497
TCONS_00014083	78.0262	-1.04065	0.389253	-2.67346	0.00750731	0.0443482
TCONS_00002009	436.546	-0.763139	0.285746	-2.67069	0.00756964	0.0446819
TCONS_00013400	108.24	-0.923186	0.345718	-2.67035	0.0075773	0.0446927
TCONS_00002791	113.568	1.02291	0.383124	2.66992	0.00758694	0.0447114
TCONS_00008972	50.3682	1.27804	0.478721	2.66969	0.00759217	0.0447114
TCONS_00006957	22.3884	1.41354	0.529747	2.66833	0.007623	0.044824
TCONS_00011392	275.711	-0.929074	0.348165	-2.66849	0.00761935	0.044824
TCONS_00001818	133.536	1.17206	0.439392	2.66745	0.00764291	0.0449065
TCONS_00015327	238.259	1.42554	0.534543	2.66684	0.00765679	0.0449357
TCONS_00015410	257.626	-0.898418	0.336917	-2.66658	0.00766264	0.0449357
TCONS_00016105	140.095	-0.833837	0.312713	-2.66646	0.00766549	0.0449357
TCONS_00013807	113.257	-0.896784	0.336421	-2.66566	0.00768369	0.0450078
TCONS_00001550	13.1154	1.64982	0.619097	2.66487	0.00770171	0.045052
TCONS_00006545	77.9619	-1.03383	0.387992	-2.66456	0.0077089	0.045052
TCONS_00013684	32.1939	1.51354	0.567978	2.66478	0.00770386	0.045052
TCONS_00007879	54.4377	-1.04121	0.390861	-2.6639	0.0077241	0.0451064
TCONS_00014050	9.51444	1.72289	0.647507	2.6608	0.00779561	0.0454893
TCONS_00014214	102.252	1.2707	0.47812	2.6577	0.00786765	0.0458685
TCONS_00014368	120.795	-0.955546	0.3596	-2.65725	0.00787809	0.0458685
TCONS_00016850	35.591	-1.07909	0.406097	-2.65723	0.0078786	0.0458685
TCONS_00005188	342.902	-0.855377	0.321958	-2.6568	0.00788862	0.045892
TCONS_00012091	158.085	-0.818011	0.308067	-2.6553	0.0079237	0.0460455
TCONS_00014736	63.5694	-0.900455	0.339134	-2.65516	0.00792705	0.0460455
TCONS_00014975	55.7438	-1.08575	0.409243	-2.65307	0.00797637	0.0462969
TCONS_00006580	17.9015	-1.486	0.560241	-2.65243	0.00799148	0.0463494
TCONS_00000208	158.05	0.874314	0.329764	2.65134	0.00801741	0.0464375
TCONS_00011644	45.0841	1.29445	0.488238	2.65128	0.00801881	0.0464375
TCONS_00007297	215.33	0.982381	0.370748	2.64973	0.00805571	0.0466159
TCONS_00011629	139.125	1.161	0.438236	2.64925	0.00806699	0.0466458
TCONS_00006480	105.945	-0.960287	0.362734	-2.64736	0.00811235	0.0468374
TCONS_00009467	12.7132	1.68069	0.634837	2.64743	0.00811061	0.0468374
TCONS_00000587	252.674	1.00052	0.37803	2.64667	0.00812887	0.0468919
TCONS_00007169	20.1687	1.67502	0.63293	2.64645	0.00813405	0.0468919
TCONS_00001715	65.5428	1.49824	0.566337	2.64549	0.00815724	0.0469642
TCONS_00010225	56.3553	0.972906	0.36777	2.64542	0.00815887	0.0469642
TCONS_00007671	14.0935	1.58158	0.598054	2.64454	0.00818025	0.0470518
TCONS_00006581	203.029	-0.769108	0.290858	-2.64427	0.00818665	0.0470533
TCONS_00010788	32.3579	1.54625	0.58497	2.64329	0.00821041	0.0471544
TCONS_00007413	17.17	1.41191	0.534236	2.64286	0.00822085	0.0471789
TCONS_00001110	24.825	1.34426	0.508853	2.64175	0.008248	0.0472992
TCONS_00009164	112.906	1.35966	0.514817	2.64106	0.00826463	0.0473591
TCONS_00003233	164.374	1.0492	0.397579	2.63896	0.00831603	0.047618
TCONS_00003825	858.848	-0.820569	0.311038	-2.63816	0.00833563	0.0476945
TCONS_00009051	173.527	-0.791531	0.300071	-2.63781	0.00834423	0.0477015
TCONS_00011229	65.2501	-1.17634	0.445987	-2.63761	0.00834933	0.0477015
TCONS_00014500	16.3859	-1.37649	0.521981	-2.63705	0.00836307	0.0477444
TCONS_00008758	227.385	-0.936352	0.355146	-2.63653	0.00837593	0.0477465
TCONS_00014093	15.1063	1.4356	0.544458	2.63675	0.00837052	0.0477465
TCONS_00007703	1474.59	1.2048	0.457071	2.63592	0.00839089	0.0477962
TCONS_00007460	301.056	-0.788523	0.299257	-2.63494	0.00841531	0.0478997
TCONS_00002007	184.201	1.18171	0.448975	2.63203	0.00848768	0.0481821
TCONS_00002887	183.565	1.10865	0.421306	2.63146	0.00850193	0.0481821
TCONS_00004509	80.0382	-1.03332	0.392653	-2.63165	0.00849714	0.0481821
TCONS_00008322	29.0718	1.3366	0.507696	2.63267	0.00847159	0.0481821
TCONS_00008323	11.0698	-1.61328	0.613212	-2.63087	0.00851659	0.0481821
TCONS_00012390	95.5127	-1.00253	0.381049	-2.63098	0.00851389	0.0481821
TCONS_00015748	5.31441	-2.0365	0.774138	-2.63067	0.00852162	0.0481821
TCONS_00015922	110.615	-0.963039	0.36593	-2.63176	0.00849449	0.0481821
TCONS_00017004	15.2715	-1.47152	0.559297	-2.63102	0.00851279	0.0481821
TCONS_00006598	126.762	-0.89199	0.339196	-2.62972	0.00854544	0.0482455
TCONS_00008057	37.568	1.12572	0.428048	2.6299	0.00854108	0.0482455
TCONS_00007841	82.5691	-0.907375	0.345213	-2.62845	0.00857748	0.0483906
TCONS_00014567	175.601	-0.855009	0.325327	-2.62815	0.008585	0.0483974
TCONS_00015029	61.8594	0.910024	0.346316	2.62772	0.00859581	0.0484227
TCONS_00002496	146.015	1.19942	0.456597	2.62687	0.00861751	0.0485091
TCONS_00012823	7.43716	1.81943	0.693026	2.62534	0.00865619	0.0486911
TCONS_00007392	474.555	1.02564	0.390781	2.62458	0.0086755	0.0487638
TCONS_00009864	84.7454	-0.922369	0.351808	-2.6218	0.00874674	0.0491282
TCONS_00009517	68.2036	-0.97797	0.373107	-2.62115	0.00876329	0.0491489
TCONS_00010769	12.0071	1.6643	0.634911	2.62131	0.00875919	0.0491489
TCONS_00000329	197.35	-0.989005	0.377536	-2.61963	0.00880246	0.0491938
TCONS_00009061	4.19889	2.03298	0.776082	2.61955	0.00880459	0.0491938
TCONS_00009651	129.521	1.60656	0.613345	2.61935	0.00880988	0.0491938
TCONS_00012883	29.4136	1.39608	0.532884	2.61987	0.00879645	0.0491938
TCONS_00013581	343.138	-0.693607	0.264739	-2.61997	0.00879379	0.0491938
TCONS_00014927	2073.93	-0.677197	0.258476	-2.61996	0.0087941	0.0491938
TCONS_00001544	23.3049	1.30404	0.498265	2.61716	0.00886646	0.0494737
TCONS_00003293	119.422	-0.96992	0.370822	-2.6156	0.0089072	0.0496478
TCONS_00013562	84.8781	1.35872	0.519493	2.61546	0.00891064	0.0496478
TCONS_00005460	130.506	0.966276	0.369572	2.61458	0.00893361	0.0497396
TCONS_00000043	234.695	1.11321	0.425874	2.61395	0.00895026	0.049796
TCONS_00011919	165.122	-0.829374	0.317432	-2.61276	0.00898147	0.0499047
TCONS_00015700	288.207	-0.75217	0.287889	-2.61271	0.00898285	0.0499047
TCONS_00005812	11.4472	-1.55766	0.596541	-2.61116	0.00902359	0.0500947
TCONS_00001349	17.074	1.46272	0.560868	2.60796	0.00910838	0.0505287
TCONS_00001970	68.9706	-0.973416	0.373516	-2.60609	0.00915818	0.0507382
TCONS_00004613	99.5302	1.09337	0.41955	2.60605	0.00915941	0.0507382
TCONS_00011045	57.053	1.25984	0.483552	2.60538	0.00917722	0.0508001
TCONS_00001507	170.152	-0.875811	0.336337	-2.60397	0.00921499	0.0509723
TCONS_00016352	54.0517	1.07002	0.411088	2.6029	0.00924385	0.051095
TCONS_00001076	6.6454	1.83641	0.705759	2.60204	0.00926723	0.0511134
TCONS_00006243	26.6149	1.17381	0.451096	2.60213	0.00926462	0.0511134
TCONS_00009686	30.4258	1.40358	0.53936	2.60231	0.00925991	0.0511134
TCONS_00000155	170.275	1.21946	0.468928	2.60053	0.00930804	0.0513012
TCONS_00007606	16.4092	1.70692	0.656438	2.60028	0.00931468	0.0513012
TCONS_00004615	36.5841	1.35044	0.519879	2.59759	0.00938793	0.0516471
TCONS_00016759	22.8319	1.68385	0.648261	2.59748	0.009391	0.0516471
TCONS_00000585	32.706	-1.1683	0.449873	-2.59697	0.0094051	0.0516875
TCONS_00000858	401.402	1.10592	0.426957	2.59025	0.00959071	0.0522943
TCONS_00001175	70.4678	1.06605	0.411381	2.59138	0.00955913	0.0522943
TCONS_00003450	31.997	-1.13856	0.43949	-2.59064	0.0095799	0.0522943
TCONS_00003757	45.4745	1.3913	0.536931	2.59122	0.00956372	0.0522943
TCONS_00003878	25.4544	1.16172	0.448328	2.59122	0.00956361	0.0522943
TCONS_00004567	220.538	-0.956008	0.368891	-2.59157	0.0095538	0.0522943
TCONS_00005748	107.709	1.07629	0.415328	2.59143	0.00955791	0.0522943
TCONS_00007906	44.3738	-1.07982	0.416813	-2.59066	0.00957913	0.0522943
TCONS_00008358	316.8	-0.771539	0.297848	-2.59038	0.00958701	0.0522943
TCONS_00009071	49.9822	-1.01648	0.392063	-2.59264	0.00952428	0.0522943
TCONS_00012264	27.2229	1.49387	0.576688	2.59043	0.00958551	0.0522943
TCONS_00002142	68.2674	1.3721	0.529971	2.58901	0.00962519	0.052445
TCONS_00003238	24.7404	1.37759	0.532242	2.58827	0.00964587	0.0525202
TCONS_00001674	298.167	-0.728831	0.28177	-2.58662	0.00969227	0.0527353
TCONS_00000123	1105.76	-0.65055	0.251732	-2.58429	0.00975789	0.0527581
TCONS_00000320	124.441	-0.850535	0.329086	-2.58454	0.00975092	0.0527581
TCONS_00000396	13.2837	1.66618	0.644738	2.58427	0.00975853	0.0527581
TCONS_00000641	42.6053	-1.13537	0.439179	-2.58521	0.00973201	0.0527581
TCONS_00001235	28.8548	1.1497	0.444555	2.58619	0.00970441	0.0527581
TCONS_00001707	63.2012	1.28128	0.495792	2.58431	0.00975737	0.0527581
TCONS_00003593	86.9946	-1.11102	0.4299	-2.58436	0.00975595	0.0527581
TCONS_00007300	390.364	-0.64216	0.248354	-2.58566	0.00971917	0.0527581
TCONS_00007608	40.9545	1.10972	0.429335	2.58474	0.00974539	0.0527581
TCONS_00000282	89.55	-0.824485	0.319207	-2.58291	0.00979698	0.0529286
TCONS_00014254	208.737	-1.00247	0.388198	-2.58236	0.00981268	0.052976
TCONS_00006663	181.949	-0.752703	0.291551	-2.58172	0.00983092	0.0530371
TCONS_00012107	102.711	-0.975228	0.37792	-2.58051	0.00986536	0.0531854
TCONS_00002181	60.7983	1.08455	0.420365	2.58003	0.00987928	0.0532229
TCONS_00002150	15.8625	1.83657	0.711992	2.57947	0.00989508	0.0532705
TCONS_00008239	147.839	1.55879	0.604594	2.57825	0.00993026	0.0534223
TCONS_00002350	715.696	-0.732249	0.284128	-2.57718	0.00996093	0.0535245
TCONS_00006184	190.41	-0.781844	0.303406	-2.57689	0.00996935	0.0535245
TCONS_00008909	542.362	1.25446	0.486832	2.57678	0.00997261	0.0535245
TCONS_00013487	55.5588	-0.972046	0.377257	-2.57662	0.00997724	0.0535245
TCONS_00015677	438.1	1.00201	0.38905	2.57553	0.0100086	0.0536551
TCONS_00000894	4.90455	2.03361	0.789751	2.575	0.0100241	0.0537006
TCONS_00005819	13.9954	1.63375	0.634683	2.57412	0.0100494	0.0537609
TCONS_00014686	4.68894	2.06332	0.801507	2.5743	0.0100442	0.0537609
TCONS_00000888	507.224	1.27911	0.497446	2.57136	0.0101299	0.0541535
TCONS_00002548	91.5896	0.935964	0.364192	2.56997	0.0101706	0.0542206
TCONS_00002960	21.016	-1.46117	0.568501	-2.57022	0.0101633	0.0542206
TCONS_00004048	28.0929	-1.24805	0.485627	-2.56997	0.0101708	0.0542206
TCONS_00009768	93.6898	-0.85314	0.331933	-2.57022	0.0101634	0.0542206
TCONS_00004611	125.707	1.1188	0.4355	2.569	0.0101992	0.0543344
TCONS_00006870	230.882	-0.805809	0.313768	-2.56817	0.0102238	0.0544273
TCONS_00001787	685.578	-0.699451	0.2724	-2.56774	0.0102364	0.0544566
TCONS_00008053	71.7279	1.33855	0.521442	2.56701	0.0102579	0.054533
TCONS_00005341	55.662	-1.0207	0.39767	-2.5667	0.0102672	0.0545443
TCONS_00012135	115.202	1.13515	0.442359	2.56613	0.010284	0.0545956
TCONS_00015918	46.6993	1.19371	0.465233	2.56584	0.0102926	0.0546038
TCONS_00011917	25.0767	1.64576	0.641557	2.56525	0.0103101	0.0546584
TCONS_00005250	29.5627	1.42809	0.556879	2.56446	0.0103338	0.054713
TCONS_00005995	249.419	1.03853	0.404976	2.56443	0.0103347	0.054713
TCONS_00004447	128.384	1.30957	0.510833	2.56359	0.0103594	0.0547861
TCONS_00008258	114.798	1.06269	0.414548	2.56348	0.0103628	0.0547861
TCONS_00010637	38.4303	1.35358	0.528117	2.56304	0.0103761	0.0548187
TCONS_00008731	5.78526	-1.90895	0.745663	-2.56007	0.0104652	0.0551929
TCONS_00009593	932.31	0.719702	0.281139	2.55995	0.0104686	0.0551929
TCONS_00014065	7.60027	-1.72225	0.672669	-2.56033	0.0104574	0.0551929
TCONS_00013670	292.132	-0.809208	0.316167	-2.55943	0.0104844	0.0552379
TCONS_00002295	126.152	-0.882997	0.345079	-2.55883	0.0105026	0.0552581
TCONS_00009570	23.2351	1.25767	0.491482	2.55894	0.0104992	0.0552581
TCONS_00001204	146.266	1.02792	0.401794	2.55833	0.0105176	0.0552852
TCONS_00011902	577.544	-0.722551	0.282448	-2.55818	0.0105223	0.0552852
TCONS_00002919	5.43656	1.83732	0.718456	2.55732	0.0105484	0.0553234
TCONS_00009933	97.4224	-0.848005	0.331579	-2.55748	0.0105435	0.0553234
TCONS_00016920	15.4001	1.68111	0.657399	2.55722	0.0105512	0.0553234
TCONS_00011887	4725.16	-0.793236	0.310263	-2.55665	0.0105685	0.0553758
TCONS_00000290	84.9016	-0.928002	0.363261	-2.55465	0.0106296	0.0553874
TCONS_00001287	37.6558	1.49706	0.585873	2.55527	0.0106106	0.0553874
TCONS_00003788	141.805	0.931534	0.364598	2.55496	0.0106199	0.0553874
TCONS_00004594	41.164	-1.29286	0.506123	-2.55444	0.0106358	0.0553874
TCONS_00005820	55.3462	-1.00792	0.394367	-2.55578	0.010595	0.0553874
TCONS_00007865	126.659	-0.783831	0.306844	-2.5545	0.0106342	0.0553874
TCONS_00010034	375.973	-0.837767	0.32775	-2.55612	0.0105847	0.0553874
TCONS_00012936	17.5766	1.30735	0.511667	2.55507	0.0106165	0.0553874
TCONS_00015975	332.724	-0.846502	0.331322	-2.55492	0.0106212	0.0553874
TCONS_00011291	46.6511	1.28783	0.504376	2.55331	0.0106705	0.0555303
TCONS_00006065	5.02289	2.02815	0.795502	2.54952	0.0107871	0.0560789
TCONS_00007702	12.8587	1.71762	0.673798	2.54917	0.0107979	0.0560789
TCONS_00012198	721.75	-0.772916	0.303189	-2.54929	0.0107943	0.0560789
TCONS_00005147	703.737	-0.733957	0.287983	-2.54861	0.0108152	0.0561185
TCONS_00005675	63.5763	-0.909528	0.356928	-2.54822	0.0108276	0.0561185
TCONS_00008623	181.039	1.1001	0.431688	2.54837	0.0108227	0.0561185
TCONS_00014476	72.1551	-0.929288	0.364748	-2.54775	0.0108419	0.0561545
TCONS_00006522	57.6434	1.27111	0.498988	2.54737	0.0108539	0.056179
TCONS_00002439	112.345	0.924253	0.362872	2.54705	0.0108638	0.0561919
TCONS_00001595	26.0837	1.23207	0.483854	2.54637	0.010885	0.0562258
TCONS_00004101	44.7299	1.40933	0.553462	2.54638	0.0108845	0.0562258
TCONS_00001148	88.1784	-1.09925	0.431875	-2.5453	0.0109184	0.0563471
TCONS_00003861	33.285	-1.31064	0.514955	-2.54515	0.0109232	0.0563471
TCONS_00009233	25.6997	1.31481	0.516648	2.54489	0.0109313	0.0563506
TCONS_00004994	86.889	-0.942557	0.370422	-2.54455	0.0109418	0.0563668
TCONS_00008221	47.0652	1.40538	0.552644	2.54301	0.0109902	0.0564899
TCONS_00008389	18.8804	1.32746	0.521899	2.54351	0.0109744	0.0564899
TCONS_00008492	1024.31	0.6503	0.255708	2.54314	0.0109862	0.0564899
TCONS_00011292	1322.16	1.10744	0.435511	2.54285	0.0109952	0.0564899
TCONS_00006426	24.201	1.19157	0.468752	2.54201	0.0110218	0.0565507
TCONS_00009241	74.4426	1.08865	0.428234	2.54218	0.0110163	0.0565507
TCONS_00001166	14.6644	1.53525	0.604707	2.53883	0.0111223	0.0570088
TCONS_00010385	32.4394	-1.1997	0.472576	-2.53864	0.0111285	0.0570088
TCONS_00015907	92.0791	-0.86969	0.342602	-2.53848	0.0111335	0.0570088
TCONS_00002594	14.0653	1.53535	0.605118	2.53727	0.0111722	0.057138
TCONS_00010708	197.622	0.8092	0.318932	2.53722	0.0111737	0.057138
TCONS_00005376	19.5194	-1.40643	0.554417	-2.53677	0.011188	0.0571548
TCONS_00013772	18.4335	1.58466	0.624705	2.53665	0.0111919	0.0571548
TCONS_00005299	25.1213	1.3282	0.523686	2.53625	0.0112047	0.0571819
TCONS_00009635	95.4522	-0.833581	0.328711	-2.53591	0.0112156	0.0571995
TCONS_00004779	64.0389	1.21579	0.479568	2.53518	0.0112391	0.0572812
TCONS_00006014	30.4846	1.30165	0.513772	2.53353	0.0112921	0.0575131
TCONS_00014893	15.0804	1.46347	0.577831	2.53269	0.011319	0.0576119
TCONS_00006482	40.1157	1.16906	0.46171	2.53201	0.0113409	0.0576849
TCONS_00008441	286.754	-0.762735	0.301303	-2.53146	0.0113589	0.0576997
TCONS_00011503	449.231	0.789129	0.311717	2.53156	0.0113556	0.0576997
TCONS_00004240	5.87546	1.83287	0.724375	2.53028	0.011397	0.0578143
TCONS_00005199	176.454	-0.745819	0.294783	-2.53006	0.0114041	0.0578143
TCONS_00008156	317.371	0.901545	0.356307	2.53025	0.0113982	0.0578143
TCONS_00010765	7.83727	1.94746	0.770265	2.5283	0.0114618	0.058068
TCONS_00011408	83.4478	1.00081	0.395931	2.52774	0.01148	0.0581216
TCONS_00004904	83.7112	1.12555	0.445437	2.52685	0.0115091	0.0582304
TCONS_00011047	63.2701	1.09392	0.433097	2.5258	0.0115435	0.0583658
TCONS_00013349	17.2954	1.43868	0.569776	2.525	0.0115698	0.0584605
TCONS_00008068	137.965	1.06397	0.421472	2.52441	0.0115892	0.0585195
TCONS_00016769	17.8205	-1.43092	0.566905	-2.52409	0.0115997	0.058534
TCONS_00009880	14.5154	-1.53592	0.608646	-2.52351	0.0116191	0.0585931
TCONS_00014817	23.2126	-1.34873	0.534768	-2.52208	0.0116664	0.058793
TCONS_00004603	81.9486	-1.0892	0.4321	-2.52071	0.0117119	0.0589541
TCONS_00006751	161.909	0.935928	0.371406	2.51996	0.0117369	0.0589541
TCONS_00008781	185.1	-0.804707	0.319326	-2.52002	0.0117349	0.0589541
TCONS_00010050	261.647	-0.753738	0.299032	-2.52059	0.0117157	0.0589541
TCONS_00016499	12.2071	1.49546	0.593362	2.52031	0.0117252	0.0589541
TCONS_00002733	29.8685	-1.42335	0.565315	-2.5178	0.0118091	0.059212
TCONS_00003747	33.0729	1.13283	0.449941	2.51773	0.0118114	0.059212
TCONS_00011806	6.22721	-1.89335	0.751936	-2.51796	0.0118037	0.059212
TCONS_00006488	4.65353	1.94933	0.774365	2.51732	0.0118251	0.0592418
TCONS_00003380	116.461	0.97821	0.388782	2.51609	0.0118665	0.0593714
TCONS_00008000	30.1501	-1.22636	0.487389	-2.51618	0.0118636	0.0593714
TCONS_00005800	23.6342	1.24953	0.49673	2.51551	0.0118861	0.0593915
TCONS_00010560	19.5055	1.38708	0.551388	2.51562	0.0118822	0.0593915
TCONS_00013780	470.708	-0.623808	0.24812	-2.51414	0.0119323	0.0595834
TCONS_00007393	145.607	-0.798493	0.317662	-2.51365	0.0119488	0.0596268
TCONS_00001698	152.457	1.01325	0.403195	2.51306	0.0119689	0.0596883
TCONS_00014264	173.034	0.842306	0.335249	2.51248	0.0119885	0.0597474
TCONS_00002631	127.671	-0.888259	0.354151	-2.50814	0.012137	0.0603735
TCONS_00013859	125.954	0.968964	0.386313	2.50823	0.0121337	0.0603735
TCONS_00016111	186.307	-0.856334	0.341426	-2.50811	0.0121378	0.0603735
TCONS_00000393	110.258	0.997973	0.398076	2.50699	0.0121765	0.060408
TCONS_00001969	96.7276	1.5611	0.622925	2.50608	0.012208	0.060408
TCONS_00004196	98.2014	-0.809237	0.322782	-2.50707	0.0121737	0.060408
TCONS_00007524	484.877	-0.854709	0.340892	-2.50727	0.0121667	0.060408
TCONS_00009868	91.1507	-0.973209	0.388325	-2.50617	0.0122046	0.060408
TCONS_00010513	73.8217	0.885223	0.353192	2.50635	0.0121985	0.060408
TCONS_00010816	24.4123	1.3655	0.544729	2.50675	0.0121847	0.060408
TCONS_00016141	428.622	1.16233	0.463639	2.50698	0.0121769	0.060408
TCONS_00001088	88.7938	1.32259	0.527851	2.50561	0.012224	0.0604485
TCONS_00008545	23.7097	1.29842	0.518388	2.50472	0.0122547	0.0604829
TCONS_00011223	375.003	-0.712415	0.284425	-2.50476	0.0122534	0.0604829
TCONS_00011747	1495.89	1.05045	0.419374	2.5048	0.012252	0.0604829
TCONS_00013069	122.79	0.921052	0.367792	2.50428	0.0122702	0.0605203
TCONS_00009572	53.1584	1.21982	0.487153	2.50398	0.0122805	0.060532
TCONS_00008003	511.22	-0.886715	0.354234	-2.50319	0.0123079	0.060628
TCONS_00008932	319.728	1.49649	0.597966	2.50263	0.0123274	0.060681
TCONS_00012884	74.4972	1.09912	0.439223	2.50243	0.0123345	0.060681
TCONS_00007920	65.079	-0.922663	0.368918	-2.501	0.0123844	0.0608332
TCONS_00009869	249.045	0.737951	0.295079	2.50086	0.0123893	0.0608332
TCONS_00009973	82.198	1.2948	0.517659	2.50126	0.0123752	0.0608332
TCONS_00004539	170.685	-0.70118	0.280477	-2.49996	0.0124207	0.0609484
TCONS_00003694	3.88562	-1.98598	0.79501	-2.49806	0.0124875	0.0611986
TCONS_00011926	44.819	1.12034	0.44849	2.49804	0.0124883	0.0611986
TCONS_00014503	20.5851	-1.42825	0.571796	-2.49783	0.0124957	0.0611986
TCONS_00007697	35.0692	1.33178	0.533275	2.49736	0.0125122	0.0612399
TCONS_00002393	12.2566	1.50503	0.602793	2.49675	0.0125336	0.0612879
TCONS_00008517	509.773	0.959065	0.384144	2.49663	0.012538	0.0612879
TCONS_00004635	36.905	1.26268	0.50591	2.49586	0.0125651	0.0613814
TCONS_00015984	70.8577	0.899944	0.360688	2.49508	0.0125929	0.0614386
TCONS_00016630	944.293	-0.718219	0.287851	-2.49511	0.0125919	0.0614386
TCONS_00004435	8.42411	1.9206	0.769847	2.49479	0.0126032	0.0614498
TCONS_00007038	177.647	-0.723075	0.289954	-2.49376	0.0126399	0.0615894
TCONS_00004669	34.8364	1.24586	0.49974	2.49301	0.0126664	0.061679
TCONS_00011207	46.9641	-1.07506	0.431407	-2.49198	0.0127032	0.0618192
TCONS_00003049	85.7103	-0.847332	0.340102	-2.4914	0.012724	0.0618415
TCONS_00004792	81.2457	-0.879521	0.353006	-2.49151	0.01272	0.0618415
TCONS_00015940	167.648	-1.14442	0.459735	-2.4893	0.0127995	0.0621691
TCONS_00016563	14.0196	-1.59334	0.640209	-2.48878	0.0128181	0.0622199
TCONS_00014160	85.0836	-0.948687	0.381558	-2.48635	0.012906	0.0626069
TCONS_00009642	5.64127	1.83027	0.736273	2.48585	0.0129241	0.0626551
TCONS_00016592	719.647	-0.842747	0.339221	-2.48436	0.0129785	0.0628789
TCONS_00002309	10.5993	1.57646	0.635043	2.48244	0.0130486	0.0631782
TCONS_00015368	57.1651	1.51096	0.608803	2.48185	0.0130703	0.0632435
TCONS_00005726	646.596	-0.598237	0.241154	-2.48072	0.0131116	0.0633694
TCONS_00009767	157.425	-0.73619	0.296768	-2.48069	0.0131129	0.0633694
TCONS_00008934	20.4792	1.26365	0.509555	2.47991	0.0131414	0.0634672
TCONS_00000489	111.48	-0.867838	0.350024	-2.47937	0.0131615	0.0635238
TCONS_00003377	22.824	-1.32477	0.534515	-2.47845	0.0131953	0.0635658
TCONS_00007437	118.001	-0.858717	0.346535	-2.47801	0.0132117	0.0635658
TCONS_00007773	334.804	-0.732206	0.295412	-2.4786	0.0131901	0.0635658
TCONS_00008172	189.142	-0.768193	0.31	-2.47804	0.0132105	0.0635658
TCONS_00008878	89.0451	-0.894815	0.361055	-2.47833	0.0131999	0.0635658
TCONS_00002092	35.2899	-1.04227	0.420863	-2.47651	0.0132672	0.0637528
TCONS_00013993	16.042	1.64748	0.665243	2.47651	0.0132672	0.0637528
TCONS_00000298	21.6619	1.27246	0.513951	2.47583	0.0132925	0.0638276
TCONS_00016427	46.9232	-1.02963	0.415903	-2.47565	0.0132995	0.0638276
TCONS_00004262	48.8171	1.22113	0.493369	2.47508	0.0133207	0.0638893
TCONS_00005135	15.7179	-1.50877	0.60982	-2.47413	0.0133563	0.063965
TCONS_00006445	64.1608	-1.17098	0.473251	-2.47432	0.013349	0.063965
TCONS_00016820	105.513	-0.91809	0.371098	-2.47398	0.0133616	0.063965
TCONS_00005133	56.4868	-0.897565	0.362889	-2.47339	0.0133839	0.0640318
TCONS_00009391	51.2796	1.02883	0.416027	2.47298	0.0133992	0.0640647
TCONS_00010040	7.25789	1.76875	0.715307	2.47272	0.013409	0.0640719
TCONS_00008604	67.2408	-0.967957	0.391564	-2.47203	0.0134349	0.0641557
TCONS_00002458	283.874	-0.842112	0.340693	-2.47176	0.0134449	0.0641631
TCONS_00013058	34.2276	-1.07066	0.43342	-2.47027	0.0135013	0.064392
TCONS_00002260	474.08	-0.712033	0.28846	-2.4684	0.0135719	0.0646082
TCONS_00009303	41.6509	-1.14477	0.463704	-2.46876	0.0135583	0.0646082
TCONS_00016153	424.275	-0.691744	0.280232	-2.46847	0.0135692	0.0646082
TCONS_00013310	295.179	1.26406	0.512348	2.46719	0.0136179	0.0647865
TCONS_00010447	37.7226	1.24432	0.504848	2.46474	0.0137112	0.0651898
TCONS_00015657	40.1211	-1.08573	0.440574	-2.46435	0.0137262	0.065221
TCONS_00011277	401.878	-0.643117	0.261016	-2.4639	0.0137436	0.0652628
TCONS_00002246	119.324	-0.844739	0.343135	-2.46183	0.0138231	0.065478
TCONS_00007438	243.969	-0.844357	0.342937	-2.46213	0.0138113	0.065478
TCONS_00008489	378.009	-0.674916	0.274146	-2.46189	0.0138208	0.065478
TCONS_00013678	29.474	1.41811	0.575896	2.46244	0.0137995	0.065478
TCONS_00006856	383.199	-0.701251	0.284979	-2.46071	0.0138662	0.0656411
TCONS_00000892	203.128	1.11705	0.454147	2.45967	0.0139066	0.0656701
TCONS_00003234	40.1567	1.37409	0.558578	2.45999	0.0138943	0.0656701
TCONS_00004748	28.9513	1.12562	0.457607	2.45978	0.0139021	0.0656701
TCONS_00005941	7.39829	1.76819	0.718709	2.46022	0.013885	0.0656701
TCONS_00008158	17.3976	-1.3518	0.54996	-2.458	0.0139713	0.0659108
TCONS_00016889	1937.75	-0.654875	0.266436	-2.45791	0.0139748	0.0659108
TCONS_00007066	8.12229	1.62007	0.659415	2.45682	0.0140172	0.0660291
TCONS_00009052	130.907	-0.862565	0.351066	-2.45699	0.0140106	0.0660291
TCONS_00008034	47.714	1.31861	0.537097	2.45508	0.0140854	0.0663098
TCONS_00007389	65.321	1.0846	0.441823	2.45484	0.0140948	0.0663132
TCONS_00006110	34.3577	1.4184	0.577954	2.45417	0.0141209	0.0663952
TCONS_00008710	31.5857	1.10375	0.449934	2.45315	0.0141612	0.0665437
TCONS_00003086	102.387	0.868175	0.353968	2.45269	0.0141792	0.0665465
TCONS_00011427	101.701	-0.895531	0.365107	-2.45279	0.0141754	0.0665465
TCONS_00009179	397.043	-0.697148	0.284288	-2.45226	0.0141961	0.066585
TCONS_00003041	73.614	1.16687	0.475884	2.45201	0.0142061	0.0665912
TCONS_00003667	196.387	-0.702348	0.28669	-2.44985	0.0142917	0.0668471
TCONS_00008092	7.13644	1.80149	0.73551	2.44931	0.0143131	0.0668471
TCONS_00012154	623.588	1.37171	0.559973	2.4496	0.0143015	0.0668471
TCONS_00013982	150.247	-0.821162	0.335238	-2.44949	0.0143059	0.0668471
TCONS_00015018	8.34059	1.88709	0.770276	2.44989	0.0142901	0.0668471
TCONS_00015190	9.50379	1.63515	0.667399	2.45004	0.0142841	0.0668471
TCONS_00016680	19.8527	1.52636	0.623254	2.44902	0.0143246	0.0668597
TCONS_00013491	13.8515	-1.45039	0.592366	-2.44847	0.0143464	0.0668852
TCONS_00013777	50.1339	0.914583	0.373537	2.44844	0.0143475	0.0668852
TCONS_00005095	314.519	-0.749536	0.306187	-2.44796	0.0143666	0.0669333
TCONS_00001867	5.36295	1.80008	0.735788	2.44647	0.0144265	0.0671304
TCONS_00010099	195.67	1.05885	0.432804	2.44649	0.0144256	0.0671304
TCONS_00000165	473.988	-0.748871	0.306253	-2.44527	0.0144745	0.0672483
TCONS_00001068	6.25215	-1.80109	0.736917	-2.44408	0.0145221	0.0672483
TCONS_00003408	144.587	-0.769097	0.314611	-2.4446	0.0145013	0.0672483
TCONS_00004953	147.051	0.848578	0.347146	2.44444	0.0145076	0.0672483
TCONS_00007753	10.4089	1.51929	0.621608	2.44413	0.0145202	0.0672483
TCONS_00007768	225.246	-0.694538	0.28408	-2.44486	0.0144907	0.0672483
TCONS_00014808	107.432	-0.848444	0.347129	-2.44418	0.0145183	0.0672483
TCONS_00016342	14.5682	1.41401	0.578193	2.44557	0.0144624	0.0672483
TCONS_00002910	33.7515	1.19395	0.48864	2.44341	0.0145492	0.0673332
TCONS_00004935	79.1859	-0.90239	0.369559	-2.44181	0.014614	0.0675921
TCONS_00003082	182.361	-0.68997	0.282602	-2.44148	0.014627	0.0676112
TCONS_00003335	493.596	0.64177	0.263042	2.4398	0.0146952	0.0677629
TCONS_00007780	750.442	-0.671651	0.27525	-2.44015	0.0146811	0.0677629
TCONS_00010902	66.4563	-0.821566	0.336656	-2.44037	0.0146721	0.0677629
TCONS_00011334	152.972	-1.03123	0.422653	-2.4399	0.0146912	0.0677629
TCONS_00002912	11.2038	1.51601	0.621623	2.4388	0.0147362	0.067911
TCONS_00005220	87.1198	-0.882357	0.361847	-2.43848	0.0147492	0.0679297
TCONS_00004194	52.9209	1.17807	0.483215	2.43799	0.014769	0.0679393
TCONS_00013508	13.3016	1.52581	0.625832	2.43806	0.0147664	0.0679393
TCONS_00002683	14.0536	1.72951	0.709479	2.43772	0.0147801	0.0679492
TCONS_00006054	113.117	-0.773475	0.317352	-2.43727	0.0147985	0.0679929
TCONS_00007538	24.3337	1.30743	0.536561	2.43668	0.0148228	0.0680229
TCONS_00012331	128.693	0.837416	0.343656	2.43678	0.0148185	0.0680229
TCONS_00006157	7.3002	1.71308	0.703309	2.43574	0.0148614	0.0680777
TCONS_00013893	8.59914	1.6502	0.677454	2.43589	0.0148551	0.0680777
TCONS_00013926	47.768	1.02155	0.419362	2.43597	0.0148518	0.0680777
TCONS_00011458	92.956	-0.819753	0.336731	-2.43444	0.0149147	0.0681995
TCONS_00015916	130.239	-0.945257	0.38826	-2.4346	0.0149084	0.0681995
TCONS_00016928	257.88	0.876132	0.359887	2.43446	0.0149139	0.0681995
TCONS_00013744	69.5578	-0.922643	0.379128	-2.43359	0.01495	0.0683199
TCONS_00001091	43.9439	-1.01827	0.418554	-2.43283	0.0149815	0.0684202
TCONS_00001545	69.4418	1.20627	0.495872	2.43262	0.0149898	0.0684202
TCONS_00003367	342.961	-0.689322	0.2835	-2.43147	0.0150378	0.0685983
TCONS_00000898	53.0752	1.13583	0.467258	2.43084	0.0150639	0.0686567
TCONS_00003309	14.886	1.5242	0.627053	2.43073	0.0150686	0.0686567
TCONS_00014353	88.0967	0.895527	0.368624	2.42938	0.0151249	0.0688722
TCONS_00002720	414.723	-0.632951	0.260605	-2.42877	0.0151501	0.0689049
TCONS_00007758	233.455	1.11597	0.459441	2.42898	0.0151413	0.0689049
TCONS_00016364	123.849	0.839697	0.345776	2.42844	0.0151638	0.0689262
TCONS_00012668	79.3772	-0.822923	0.339092	-2.42684	0.0152309	0.0691901
TCONS_00000784	31.5437	1.43218	0.590236	2.42645	0.0152475	0.0692245
TCONS_00013094	3.9203	-1.93878	0.799182	-2.42595	0.0152683	0.0692779
TCONS_00002935	28.3903	-1.11245	0.458946	-2.42392	0.0153541	0.0696104
TCONS_00012465	59.0866	-0.893738	0.368737	-2.42378	0.0153598	0.0696104
TCONS_00011418	226.401	0.975251	0.402421	2.42346	0.0153735	0.0696312
TCONS_00001433	32.89	-1.14311	0.471801	-2.42286	0.0153988	0.0697045
TCONS_00003108	97.7555	0.900118	0.371599	2.42228	0.0154234	0.0697745
TCONS_00010553	40.9066	1.19496	0.493389	2.42195	0.0154375	0.0697973
TCONS_00005219	57.0508	1.30029	0.536961	2.42157	0.0154534	0.069828
TCONS_00000437	33.7742	1.49342	0.617034	2.42031	0.0155071	0.0699465
TCONS_00003945	229.242	-0.783524	0.323698	-2.42054	0.0154975	0.0699465
TCONS_00007026	106.709	-0.803129	0.331808	-2.42046	0.0155007	0.0699465
TCONS_00015251	38.8161	-1.20666	0.498633	-2.41994	0.0155232	0.069978
TCONS_00010701	36.696	1.18615	0.490331	2.41909	0.0155594	0.0700998
TCONS_00003574	10.3941	1.56751	0.648129	2.41851	0.015584	0.0701694
TCONS_00012229	8.57965	1.57821	0.652654	2.41815	0.0155997	0.0701987
TCONS_00002242	170.667	-0.697101	0.288348	-2.41756	0.0156248	0.0702705
TCONS_00000597	20.147	1.2546	0.519079	2.41696	0.0156506	0.0703036
TCONS_00006098	7.53725	-1.90277	0.787246	-2.41699	0.0156494	0.0703036
TCONS_00014851	22.8284	-1.22478	0.506829	-2.41654	0.0156686	0.0703432
TCONS_00000886	10.8277	1.74608	0.722808	2.41569	0.0157055	0.0704676
TCONS_00000947	56.9391	1.14585	0.474413	2.41531	0.0157219	0.0704997
TCONS_00012139	18060.1	-0.593353	0.245707	-2.41487	0.0157407	0.0705425
TCONS_00005894	7.20933	1.74534	0.723097	2.41371	0.0157911	0.0707273
TCONS_00006823	396.173	1.01439	0.420319	2.41337	0.0158056	0.070729
TCONS_00013869	14.8697	1.42092	0.588792	2.41327	0.01581	0.070729
TCONS_00000766	135.148	1.03222	0.428087	2.41124	0.0158982	0.0707599
TCONS_00001358	79.6762	-0.867028	0.359421	-2.41229	0.0158526	0.0707599
TCONS_00006857	129.254	-0.813618	0.337419	-2.4113	0.0158959	0.0707599
TCONS_00009561	14.6928	1.35611	0.562337	2.41156	0.0158843	0.0707599
TCONS_00010003	114.468	-0.856102	0.35505	-2.41122	0.0158993	0.0707599
TCONS_00010672	6.47123	1.90428	0.78938	2.41237	0.015849	0.0707599
TCONS_00012684	39.6532	1.12398	0.466065	2.41165	0.0158805	0.0707599
TCONS_00013832	156.333	1.00187	0.415323	2.41227	0.0158536	0.0707599
TCONS_00016876	11.6727	-1.51693	0.62912	-2.4112	0.0159002	0.0707599
TCONS_00005750	362.398	-0.753209	0.31242	-2.41089	0.0159136	0.0707787
TCONS_00002862	9.38861	1.49169	0.618882	2.4103	0.0159393	0.0708517
TCONS_00001658	26.1654	1.21666	0.505042	2.40903	0.015995	0.0710166
TCONS_00002301	85.434	-0.776382	0.322253	-2.40923	0.0159862	0.0710166
TCONS_00003414	439.068	0.996583	0.414074	2.40678	0.016094	0.0714028
TCONS_00013867	99.1996	-0.791276	0.328791	-2.40663	0.0161006	0.0714028
TCONS_00016681	363.633	-0.617468	0.256594	-2.4064	0.0161106	0.0714057
TCONS_00009688	31.6591	1.15527	0.480155	2.40603	0.0161269	0.0714365
TCONS_00004247	43.8754	1.32381	0.550273	2.40573	0.0161402	0.0714539
TCONS_00000032	89.7523	-0.785737	0.326923	-2.40343	0.0162419	0.0715559
TCONS_00001039	58.6967	-0.847903	0.352841	-2.40308	0.0162578	0.0715559
TCONS_00002479	816.48	-0.593955	0.247174	-2.40298	0.0162619	0.0715559
TCONS_00004642	88.0565	1.11644	0.464562	2.40322	0.0162515	0.0715559
TCONS_00005469	79.391	-0.837493	0.348372	-2.40402	0.0162159	0.0715559
TCONS_00006021	416.111	0.628422	0.26137	2.40433	0.016202	0.0715559
TCONS_00007990	9.57395	1.47218	0.612436	2.40381	0.0162251	0.0715559
TCONS_00009678	311.09	-0.691461	0.287727	-2.40319	0.0162529	0.0715559
TCONS_00011206	270.257	-0.755893	0.314577	-2.40289	0.0162661	0.0715559
TCONS_00013748	64.38	-0.930511	0.387178	-2.40332	0.016247	0.0715559
TCONS_00014910	42.5976	1.26988	0.528127	2.4045	0.0161947	0.0715559
TCONS_00016701	82.5367	-0.809611	0.337076	-2.40187	0.0163117	0.0717153
TCONS_00001124	18.8434	1.38242	0.575845	2.40068	0.0163646	0.0717418
TCONS_00001315	159.307	0.713422	0.297153	2.40086	0.0163567	0.0717418
TCONS_00008324	32.2469	-1.0145	0.422481	-2.40129	0.0163372	0.0717418
TCONS_00012495	69.1425	-0.881936	0.367251	-2.40146	0.01633	0.0717418
TCONS_00016523	15.721	-1.39665	0.581682	-2.40105	0.0163482	0.0717418
TCONS_00005496	145.234	-0.803424	0.334755	-2.40004	0.0163934	0.0718228
TCONS_00007408	54.4108	1.09082	0.454575	2.39964	0.016411	0.0718228
TCONS_00008501	141.165	0.986788	0.411224	2.39964	0.0164113	0.0718228
TCONS_00001501	210.334	-0.77977	0.325057	-2.39887	0.0164457	0.0718923
TCONS_00014306	54.6987	-0.945196	0.394018	-2.39887	0.016446	0.0718923
TCONS_00001938	221.342	0.999302	0.416625	2.39857	0.0164594	0.07191
TCONS_00000850	87.5987	-0.886366	0.369721	-2.39739	0.0165123	0.0719646
TCONS_00004311	158.516	-0.871114	0.363375	-2.39729	0.016517	0.0719646
TCONS_00004409	396.18	-0.670363	0.279658	-2.39708	0.0165261	0.0719646
TCONS_00004555	112.023	1.10469	0.460662	2.39805	0.0164827	0.0719646
TCONS_00009177	151.369	0.850648	0.354875	2.39704	0.0165283	0.0719646
TCONS_00016672	72.1678	-0.884071	0.368818	-2.39704	0.0165281	0.0719646
TCONS_00010682	161.526	-0.853249	0.356066	-2.39633	0.0165604	0.072063
TCONS_00008340	73.3445	1.22388	0.510922	2.39542	0.0166011	0.0721952
TCONS_00009495	80.9518	1.03821	0.433447	2.39524	0.0166096	0.0721952
TCONS_00005766	137.794	1.02921	0.429827	2.39448	0.0166437	0.0723025
TCONS_00007175	19.9795	1.31707	0.550154	2.39401	0.0166652	0.0723548
TCONS_00013465	6.46193	1.81477	0.758228	2.39344	0.0166913	0.0724269
TCONS_00008792	353.503	-0.691311	0.288885	-2.39303	0.0167098	0.0724661
TCONS_00006604	17.8357	1.56291	0.653336	2.39219	0.016748	0.0725905
TCONS_00007941	58.7748	-1.16666	0.487869	-2.39134	0.0167872	0.0726958
TCONS_00016236	29.0859	1.1151	0.466327	2.39125	0.0167913	0.0726958
TCONS_00000465	6.71958	1.71634	0.71791	2.39074	0.0168144	0.0727547
TCONS_00014856	897.505	-0.613556	0.256715	-2.39003	0.0168471	0.0728548
TCONS_00002867	334.093	-0.705697	0.295422	-2.38877	0.0169048	0.0729805
TCONS_00009823	293.496	0.903759	0.378275	2.38916	0.0168872	0.0729805
TCONS_00014064	63.578	-0.950897	0.398068	-2.38878	0.0169043	0.0729805
TCONS_00016254	56.1334	-1.20103	0.502972	-2.38787	0.0169461	0.0731177
TCONS_00002776	97.4393	0.756426	0.31684	2.38741	0.0169677	0.0731282
TCONS_00013139	176.844	-0.689567	0.288818	-2.38755	0.016961	0.0731282
TCONS_00010191	119.762	-0.785569	0.329094	-2.38707	0.0169835	0.0731552
TCONS_00015512	41.8082	-1.12357	0.470786	-2.38659	0.0170055	0.0732089
TCONS_00006017	14.4377	1.30813	0.548271	2.38592	0.0170365	0.0733012
TCONS_00001060	82.6133	0.939218	0.393797	2.38503	0.0170778	0.0733981
TCONS_00015944	27.9122	-1.07895	0.452385	-2.38502	0.0170783	0.0733981
TCONS_00014670	19.0642	-1.27457	0.5345	-2.3846	0.0170977	0.0734404
TCONS_00015511	144.371	-0.798935	0.335194	-2.3835	0.0171488	0.0736187
TCONS_00000422	611.502	-0.689617	0.289471	-2.38234	0.0172031	0.0738102
TCONS_00014107	31.8097	1.18241	0.496611	2.38095	0.0172679	0.0740468
TCONS_00013105	194.869	-0.752394	0.31613	-2.38002	0.0173119	0.0741938
TCONS_00016806	163.499	-0.852561	0.358253	-2.37978	0.0173232	0.0742007
TCONS_00014060	205.686	0.999611	0.420159	2.37912	0.0173538	0.0742733
TCONS_00014111	14.5814	1.65433	0.695387	2.379	0.0173596	0.0742733
TCONS_00000287	241.717	-0.698932	0.293983	-2.37746	0.0174323	0.0744146
TCONS_00001589	85.9681	-0.772447	0.32488	-2.37764	0.0174238	0.0744146
TCONS_00005806	32.3917	1.28561	0.54071	2.37764	0.0174238	0.0744146
TCONS_00012441	19.2958	-1.18686	0.499251	-2.37728	0.0174409	0.0744146
TCONS_00015411	67.333	1.04098	0.437887	2.37727	0.0174412	0.0744146
TCONS_00003630	230.59	-0.792329	0.333535	-2.37555	0.0175227	0.0747207
TCONS_00009833	114.372	1.4101	0.593777	2.3748	0.0175586	0.0748318
TCONS_00016376	5.99076	-1.89644	0.799424	-2.37226	0.0176797	0.0753062
TCONS_00004272	312.381	-0.721681	0.304329	-2.37139	0.0177214	0.0754418
TCONS_00006929	38.093	-1.0166	0.428917	-2.37016	0.0177803	0.0756503
TCONS_00012505	70.4933	-0.810327	0.341962	-2.36964	0.0178055	0.0757003
TCONS_00012747	30.7354	-1.07863	0.455213	-2.36951	0.0178118	0.0757003
TCONS_00009281	82.0141	-0.933017	0.39381	-2.36921	0.0178264	0.07572
TCONS_00004618	52.3832	-0.958144	0.4046	-2.36813	0.0178784	0.0758567
TCONS_00010384	786.073	-0.689229	0.291044	-2.36813	0.0178784	0.0758567
TCONS_00004878	11.141	1.48413	0.626844	2.36762	0.017903	0.0759189
TCONS_00002852	7.67759	1.56858	0.662823	2.36652	0.0179564	0.0760612
TCONS_00003451	29.7504	-1.18659	0.501366	-2.36672	0.0179466	0.0760612
TCONS_00010681	337.428	0.770929	0.325881	2.36567	0.0179974	0.0761925
TCONS_00008596	16.7253	-1.21891	0.515438	-2.36479	0.0180401	0.076331
TCONS_00013218	32.0978	1.23684	0.523195	2.36401	0.0180783	0.0764506
TCONS_00004093	240.501	1.09099	0.461663	2.36317	0.0181192	0.0765812
TCONS_00000621	452.384	-0.605947	0.25649	-2.36246	0.018154	0.0766564
TCONS_00003172	149.257	0.688884	0.291603	2.3624	0.0181571	0.0766564
TCONS_00001635	502.679	-0.604188	0.25581	-2.36187	0.0181832	0.0766838
TCONS_00006946	32.6596	1.17717	0.498453	2.36165	0.0181936	0.0766838
TCONS_00014077	24.1881	1.40196	0.593634	2.36166	0.0181932	0.0766838
TCONS_00015083	235.335	-0.747193	0.316421	-2.36139	0.0182067	0.0766967
TCONS_00009189	4.46168	-1.79122	0.758676	-2.36098	0.0182266	0.0767383
TCONS_00003276	31.6135	1.21314	0.513971	2.36033	0.0182588	0.0767697
TCONS_00005526	54.0656	-0.874506	0.370519	-2.36022	0.0182642	0.0767697
TCONS_00007132	57.603	-0.912042	0.38641	-2.36029	0.0182604	0.0767697
TCONS_00000251	8.03673	1.65412	0.701208	2.35896	0.0183262	0.0768753
TCONS_00005227	13.9556	1.51944	0.64405	2.3592	0.0183141	0.0768753
TCONS_00005860	6.47428	1.70589	0.723175	2.35889	0.0183295	0.0768753
TCONS_00007353	77.0098	0.952432	0.40376	2.35891	0.0183289	0.0768753
TCONS_00011844	164.551	-0.769816	0.326529	-2.35758	0.0183947	0.0771067
TCONS_00016010	113.03	0.800213	0.339535	2.35679	0.0184338	0.0772283
TCONS_00001307	138.242	-0.71625	0.304001	-2.35608	0.018469	0.0772909
TCONS_00016829	111.257	-0.860571	0.365253	-2.35609	0.0184682	0.0772909
TCONS_00009932	233.992	-0.735242	0.312421	-2.35337	0.0186042	0.0778144
TCONS_00011415	14.5264	1.46298	0.621743	2.35304	0.0186209	0.0778413
TCONS_00011623	140.5	-0.714343	0.304164	-2.34854	0.018847	0.0787005
TCONS_00016960	12.7533	1.45459	0.61934	2.34861	0.0188434	0.0787005
TCONS_00000974	10.9894	1.43065	0.609252	2.34821	0.018864	0.0787287
TCONS_00014688	97.3428	-0.94734	0.403615	-2.34714	0.0189184	0.0789125
TCONS_00008317	235.457	-0.726591	0.309604	-2.34684	0.0189335	0.0789325
TCONS_00014765	65.444	0.932626	0.397509	2.34618	0.0189671	0.0790297
TCONS_00005195	7.06104	1.75566	0.748622	2.34518	0.0190178	0.0791978
TCONS_00009505	55.2203	0.824594	0.351652	2.34492	0.0190314	0.0792111
TCONS_00005185	116.081	0.862176	0.36778	2.34427	0.0190642	0.0793045
TCONS_00011927	63.0825	-0.935304	0.399092	-2.34358	0.0190997	0.0794089
TCONS_00007146	331.201	-0.768025	0.327746	-2.34336	0.0191111	0.0794134
TCONS_00002845	121.892	-0.722083	0.308228	-2.34269	0.0191451	0.0794745
TCONS_00009708	28.203	1.32982	0.567696	2.34249	0.0191554	0.0794745
TCONS_00010762	66.2217	0.958251	0.409079	2.34246	0.019157	0.0794745
TCONS_00007098	207.76	-0.83798	0.357789	-2.34211	0.0191752	0.079507
TCONS_00005311	16.6617	-1.39824	0.597128	-2.3416	0.0192012	0.0795715
TCONS_00010086	173.196	-0.73752	0.315065	-2.34085	0.0192397	0.0796882
TCONS_00000039	202.037	0.808101	0.34537	2.33981	0.0192934	0.0798671
TCONS_00001455	1264.61	-0.621415	0.265691	-2.33886	0.0193425	0.0800152
TCONS_00001910	202.045	-0.75915	0.324601	-2.33872	0.0193501	0.0800152
TCONS_00001619	401.867	1.00197	0.428515	2.33825	0.0193745	0.0800411
TCONS_00009515	23.202	-1.09106	0.466664	-2.33799	0.0193877	0.0800411
TCONS_00014115	29.2826	1.1813	0.505239	2.3381	0.0193823	0.0800411
TCONS_00012382	53.5126	-0.868339	0.371483	-2.3375	0.0194134	0.0801039
TCONS_00006521	366.051	-0.699421	0.299248	-2.33726	0.0194258	0.0801116
TCONS_00001311	71.2052	1.19401	0.511367	2.33493	0.0195468	0.0805674
TCONS_00010473	80.3765	1.10724	0.474269	2.33463	0.0195627	0.0805897
TCONS_00010258	311.021	1.03137	0.441883	2.33404	0.0195934	0.0806724
TCONS_00006725	25.8056	1.04674	0.44891	2.33173	0.0197146	0.081128
TCONS_00001392	6.25812	1.69108	0.725376	2.33131	0.019737	0.0811326
TCONS_00010047	426.96	-0.7174	0.307704	-2.33146	0.0197292	0.0811326
TCONS_00014439	69.9747	-0.952643	0.408677	-2.33104	0.0197512	0.0811474
TCONS_00004733	122.686	0.890843	0.382282	2.33033	0.0197888	0.0812584
TCONS_00014543	76.6753	1.17007	0.502334	2.32927	0.019845	0.0814453
TCONS_00007387	5.54803	1.85713	0.797828	2.32773	0.0199266	0.0817364
TCONS_00002750	4.78783	1.86672	0.802582	2.32589	0.0200245	0.0818325
TCONS_00006240	221.609	-0.659839	0.283673	-2.32605	0.0200159	0.0818325
TCONS_00008149	100.557	0.883409	0.379791	2.32604	0.0200165	0.0818325
TCONS_00008461	101.357	-0.850117	0.365535	-2.32568	0.0200356	0.0818325
TCONS_00009016	4.56098	-1.80763	0.776834	-2.32692	0.0199693	0.0818325
TCONS_00009103	160.606	0.878699	0.377817	2.32573	0.020033	0.0818325
TCONS_00011303	108.499	-0.835249	0.359068	-2.32616	0.02001	0.0818325
TCONS_00016380	37.5957	-1.00438	0.431743	-2.32634	0.0200003	0.0818325
TCONS_00013634	6.63816	1.72895	0.743589	2.32514	0.0200645	0.0819068
TCONS_00005882	189.613	-0.864011	0.371708	-2.32444	0.0201021	0.0819889
TCONS_00016618	18.3815	-1.17701	0.506378	-2.32436	0.020106	0.0819889
TCONS_00002567	9.66071	-1.46812	0.631709	-2.32404	0.0201233	0.0820155
TCONS_00005077	2133.43	0.629114	0.270731	2.32376	0.0201384	0.0820333
TCONS_00006867	20.448	1.26562	0.544978	2.32234	0.0202145	0.0822555
TCONS_00013837	61.5217	-0.969803	0.417569	-2.3225	0.0202061	0.0822555
TCONS_00014168	11.5079	1.52673	0.657466	2.32214	0.0202252	0.0822555
TCONS_00003148	379.601	1.34047	0.577366	2.32171	0.0202487	0.0823073
TCONS_00010764	5.6546	1.85001	0.797235	2.32053	0.0203123	0.082522
TCONS_00007587	72.2336	-0.818987	0.353084	-2.31952	0.0203667	0.0826992
TCONS_00004825	86.1135	1.31382	0.566606	2.31875	0.0204083	0.0828242
TCONS_00009392	39.4049	1.16389	0.502058	2.31824	0.0204364	0.0828944
TCONS_00008338	145.011	-0.827361	0.357059	-2.31716	0.0204952	0.0830885
TCONS_00005424	613.605	0.661562	0.28562	2.31623	0.0205456	0.0832049
TCONS_00011294	41.1639	1.18751	0.512682	2.31627	0.0205436	0.0832049
TCONS_00006241	99.9434	0.938957	0.405722	2.31429	0.0206519	0.0835912
TCONS_00000694	39.7725	1.30539	0.564302	2.31329	0.0207066	0.0836794
TCONS_00008528	67.8939	-0.897019	0.387751	-2.31339	0.0207013	0.0836794
TCONS_00008582	108.37	0.792471	0.342545	2.31348	0.0206964	0.0836794
TCONS_00015756	31.8369	0.969478	0.419532	2.31086	0.0208407	0.0841769
TCONS_00007434	10.549	-1.40115	0.606484	-2.31029	0.0208722	0.0842599
TCONS_00010462	49.7159	-0.918167	0.397509	-2.3098	0.0208991	0.0843149
TCONS_00011527	440.864	-0.702491	0.304156	-2.30964	0.0209079	0.0843149
TCONS_00001265	86.9306	1.00504	0.435432	2.30813	0.0209918	0.0846088
TCONS_00002387	78.5878	0.847372	0.367368	2.3066	0.0210771	0.0849078
TCONS_00011748	82.1487	-0.820335	0.355788	-2.30569	0.0211282	0.0850689
TCONS_00016016	15.3005	1.3828	0.6	2.30467	0.021185	0.0852526
TCONS_00002096	53.794	-0.970225	0.421215	-2.3034	0.0212565	0.0854955
TCONS_00001436	5.63918	1.80451	0.783738	2.30245	0.0213101	0.0856658
TCONS_00003174	11.6204	-1.37312	0.596441	-2.3022	0.021324	0.0856768
TCONS_00010004	105.398	1.08861	0.473001	2.30149	0.0213642	0.0857032
TCONS_00014944	7.61982	1.56459	0.679763	2.30167	0.0213538	0.0857032
TCONS_00016397	25.4767	-1.12868	0.49034	-2.30182	0.0213452	0.0857032
TCONS_00016504	39.116	-0.938687	0.408058	-2.30037	0.021427	0.0859101
TCONS_00000150	10.6348	-1.40112	0.609185	-2.29999	0.0214489	0.0859529
TCONS_00009538	216.374	-0.904374	0.39328	-2.29957	0.0214726	0.0860027
TCONS_00006284	105.163	0.954253	0.415208	2.29826	0.0215473	0.0862567
TCONS_00000558	201.995	-0.814157	0.354439	-2.29703	0.021617	0.0864905
TCONS_00000044	11.7307	1.7448	0.759875	2.29616	0.0216666	0.0865108
TCONS_00004687	25.4338	1.19569	0.520737	2.29615	0.0216675	0.0865108
TCONS_00008837	504.313	-0.607143	0.264372	-2.29655	0.0216446	0.0865108
TCONS_00011775	284.034	1.00099	0.435914	2.2963	0.0216589	0.0865108
TCONS_00013951	320.222	-0.653444	0.284607	-2.29595	0.0216786	0.0865108
TCONS_00001044	93.0841	1.03579	0.451351	2.29487	0.0217405	0.0867029
TCONS_00008541	76.7032	-0.794775	0.34635	-2.29472	0.0217494	0.0867029
TCONS_00003957	30.7588	1.31838	0.574625	2.29433	0.0217715	0.0867459
TCONS_00006696	30.4585	1.13955	0.496723	2.29413	0.0217829	0.0867459
TCONS_00000563	81.3332	-0.754369	0.328999	-2.29292	0.0218526	0.0867772
TCONS_00000658	57.9826	0.82393	0.359436	2.29229	0.0218892	0.0867772
TCONS_00003912	17.0844	1.47739	0.64452	2.29223	0.0218925	0.0867772
TCONS_00008466	95.3917	-0.790384	0.34476	-2.29256	0.0218731	0.0867772
TCONS_00009173	428.797	-0.741191	0.32335	-2.29222	0.0218928	0.0867772
TCONS_00009510	66.2651	0.981143	0.427954	2.29263	0.0218691	0.0867772
TCONS_00012266	32.2539	-1.01715	0.443486	-2.29354	0.0218172	0.0867772
TCONS_00012992	33.0293	1.4011	0.61121	2.29234	0.021886	0.0867772
TCONS_00016521	633.847	-0.586287	0.255706	-2.29282	0.0218584	0.0867772
TCONS_00007222	37.0882	1.03019	0.449559	2.29156	0.0219311	0.0868469
TCONS_00012444	56.9638	-0.987115	0.430768	-2.29152	0.0219331	0.0868469
TCONS_00003306	160.19	-0.733486	0.320117	-2.29131	0.0219456	0.0868514
TCONS_00001836	129.413	1.00395	0.438521	2.28941	0.0220557	0.0872036
TCONS_00004031	129.541	-0.865333	0.377977	-2.28938	0.0220574	0.0872036
TCONS_00000855	169.866	-0.689274	0.301174	-2.28862	0.0221013	0.087332
TCONS_00003625	43.3126	-1.13987	0.498301	-2.28751	0.022166	0.0875425
TCONS_00013795	187.688	-0.646607	0.282722	-2.28707	0.0221916	0.0875983
TCONS_00001344	62.408	-0.889221	0.388958	-2.28616	0.0222447	0.0876407
TCONS_00005884	449.829	-0.600319	0.26261	-2.28597	0.0222557	0.0876407
TCONS_00008675	193.464	-0.637249	0.278773	-2.28591	0.0222596	0.0876407
TCONS_00013814	140.16	0.860584	0.376432	2.28616	0.022245	0.0876407
TCONS_00014405	142.648	0.861809	0.37689	2.28663	0.0222173	0.0876407
TCONS_00009273	43.627	-1.0297	0.450648	-2.28493	0.0223168	0.0878207
TCONS_00000924	31.2582	-1.17036	0.512486	-2.28368	0.0223902	0.0880641
TCONS_00006975	131.101	-0.715778	0.313565	-2.28271	0.0224474	0.0881984
TCONS_00012129	17.433	1.48027	0.64842	2.28288	0.0224374	0.0881984
TCONS_00001684	146.35	-0.689222	0.302005	-2.28215	0.0224803	0.0882824
TCONS_00001046	27.5419	1.11045	0.486914	2.28058	0.0225732	0.0885096
TCONS_00003015	42.7489	-0.874186	0.383384	-2.28018	0.0225968	0.0885096
TCONS_00004097	54.6895	-0.927014	0.406563	-2.28013	0.0226003	0.0885096
TCONS_00004862	281.539	0.866367	0.379879	2.28064	0.0225699	0.0885096
TCONS_00005895	38.945	-0.925852	0.405904	-2.28096	0.0225507	0.0885096
TCONS_00009755	9.37637	1.61346	0.707655	2.28	0.0226075	0.0885096
TCONS_00016409	77.4634	-0.91224	0.400177	-2.27959	0.0226318	0.0885591
TCONS_00005101	80.2782	-0.967001	0.424304	-2.27903	0.0226653	0.0885996
TCONS_00015615	27.0436	1.20945	0.530655	2.27917	0.0226572	0.0885996
TCONS_00000871	15.2471	1.29144	0.566888	2.27812	0.0227195	0.0887224
TCONS_00009113	18.1022	1.37945	0.605523	2.27811	0.0227199	0.0887224
TCONS_00007579	47.9795	-1.04477	0.459041	-2.27597	0.0228475	0.0891298
TCONS_00011839	38.1058	1.06819	0.469307	2.27611	0.0228396	0.0891298
TCONS_00005745	110.656	-0.813183	0.35747	-2.27483	0.0229161	0.0893516
TCONS_00002918	39.3656	1.32416	0.582217	2.27433	0.0229459	0.089377
TCONS_00004306	46.4154	-0.9544	0.419618	-2.27445	0.0229392	0.089377
TCONS_00011963	196.147	0.983198	0.432417	2.27372	0.0229826	0.0894742
TCONS_00003803	37.4804	1.2628	0.555462	2.27343	0.0230003	0.0894975
TCONS_00014199	395.438	-0.68345	0.300659	-2.27317	0.0230157	0.0895121
TCONS_00003320	8.76409	-1.5117	0.665162	-2.27268	0.0230452	0.0895473
TCONS_00016126	137.444	-0.793286	0.34906	-2.27263	0.0230482	0.0895473
TCONS_00015651	6.36606	1.60612	0.706909	2.27203	0.0230845	0.0896428
TCONS_00001559	41.0061	-1.00703	0.443282	-2.27176	0.0231009	0.0896608
TCONS_00015098	14.4757	-1.37986	0.607955	-2.26968	0.0232271	0.090105
TCONS_00005444	8.25424	1.50395	0.662807	2.26906	0.0232648	0.0901142
TCONS_00005741	21.9731	1.07731	0.474704	2.26943	0.023242	0.0901142
TCONS_00016175	10.9357	1.52422	0.671742	2.26906	0.0232648	0.0901142
TCONS_00004516	66.7386	-0.891024	0.392971	-2.2674	0.0233656	0.090459
TCONS_00003100	595.207	-0.594227	0.26218	-2.26648	0.0234217	0.0906303
TCONS_00014080	33.6225	1.01912	0.449703	2.2662	0.0234393	0.0906525
TCONS_00011627	180.63	-0.761938	0.33646	-2.26457	0.023539	0.0909922
TCONS_00013096	215.773	0.704672	0.31129	2.26372	0.0235916	0.0911494
TCONS_00001533	134.546	1.04568	0.46217	2.26255	0.0236632	0.0913797
TCONS_00010667	53.4	-0.90056	0.398094	-2.26218	0.0236862	0.0914227
TCONS_00000052	41.7702	-0.936474	0.414215	-2.26084	0.0237692	0.0916505
TCONS_00013151	13.7725	1.31918	0.583454	2.26098	0.0237603	0.0916505
TCONS_00011642	31.9574	1.14204	0.505331	2.25998	0.0238228	0.0918108
TCONS_00000045	77.105	-0.816673	0.361577	-2.25864	0.0239057	0.0918678
TCONS_00001488	45.7082	-0.994927	0.440482	-2.25873	0.0239004	0.0918678
TCONS_00004599	146.636	-0.815101	0.360739	-2.25953	0.0238503	0.0918678
TCONS_00008699	15.0905	-1.24971	0.553317	-2.25858	0.0239096	0.0918678
TCONS_00009134	731.585	-0.648319	0.286952	-2.25933	0.0238629	0.0918678
TCONS_00012963	32.7946	-0.97703	0.432575	-2.25864	0.023906	0.0918678
TCONS_00013919	28.7637	1.54163	0.682912	2.25743	0.0239813	0.0920967
TCONS_00010725	143.807	-0.809928	0.358836	-2.2571	0.024002	0.0921299
TCONS_00004641	133.36	-0.842087	0.373227	-2.25623	0.024056	0.0922897
TCONS_00013810	26.54	-1.06887	0.47378	-2.25605	0.0240677	0.0922897
TCONS_00004861	70.2457	0.978597	0.4339	2.25535	0.0241111	0.0924099
TCONS_00000799	42.7975	-0.888079	0.393834	-2.25496	0.0241361	0.0924591
TCONS_00005490	163.563	-0.658969	0.292279	-2.25459	0.024159	0.0925008
TCONS_00014700	59.7719	0.91553	0.406145	2.25419	0.0241841	0.0925042
[truncated: 5,651 more rows]

## Sheet: Annot FDR
GeneID	Base mean	log2(FC)	StdErr	Wald-Stats	P-value	P-adj	Annotation Id	Protein
TCONS_00014441	7041.12	-1.26896	0.347547	-3.65119	0.000261027	0.00431286	A0A0H5R3K8	Uncharacterized protein
TCONS_00010754	676.497	-0.500372	0.258227	-1.93772	0.0526575	0.154873	A0A0H5R4U4	Uncharacterized protein (Fragment)
TCONS_00012016	9784.42	1.84961	0.492438	3.75602	0.000172637	0.00337768	A0A0H5R774	Uncharacterized protein (Fragment)
TCONS_00013804	1455.48	1.59478	0.376894	4.23139	2.32255e-05	0.000960405	A0A0H5RUC1	Uncharacterized protein (Fragment)
TCONS_00008595	231.181	1.35776	0.366106	3.70866	0.000208358	0.00372416	A0A0H5RVN0	Kazal-like domain-containing protein (Fragment)
TCONS_00008563	1712.76	-0.136895	0.322433	-0.424569	0.671151	0.793801	A2XLF2	Actin-1
TCONS_00010427	660.81	-0.554842	0.280814	-1.97584	0.0481732	0.14624	A8HS48	40S ribosomal protein S3a
TCONS_00013770	558.017	0.647155	0.445295	1.45332	0.146135	0.302063	O04386	Tubulin beta chain (Beta-tubulin)
TCONS_00012033	199.589	0.275666	0.318746	0.864847	0.387123	0.559722	O23712	Proteasome subunit alpha type-1-B (20S proteasome alpha subunit F-2) (Proteasome component 2B) (Proteasome subunit alpha type-6)
TCONS_00011386	3708.29	-0.481855	0.295356	-1.63144	0.102798	0.239248	O24534	Elongation factor 1-alpha (EF-1-alpha)
TCONS_00000662	686.201	-0.742186	0.266126	-2.78885	0.00528951	0.0350648	O42249	Guanine nucleotide-binding protein subunit beta-2-like 1 (Receptor of activated protein kinase C) (RACK)
TCONS_00001787	685.578	-0.699451	0.2724	-2.56774	0.0102364	0.0544566	O57592	60S ribosomal protein L7a (Surfeit locus protein 3)
TCONS_00000633	584.431	-0.521671	0.269892	-1.93289	0.0532497	0.155957	O65050	60S ribosomal protein L15-1
TCONS_00003672	880.761	0.277096	0.368418	0.752125	0.451976	0.622016	P04255	Histone H2B 1
TCONS_00000328	4617.71	0.236369	0.268826	0.879261	0.37926	0.552864	P05214	Tubulin alpha-3 chain (Alpha-tubulin 3/7) (Alpha-tubulin isotype M-alpha-3/7) (Tubulin alpha-3/alpha-7 chain) [Cleaved into: Detyrosinated tubulin alpha-3 chain]
TCONS_00002946	4841.16	0.243505	0.309347	0.787157	0.43119	0.60296	P09189	Heat shock cognate 70 kDa protein
TCONS_00002866	827.694	-0.286098	0.327964	-0.872346	0.383019	0.55622	P35007	Adenosylhomocysteinase (AdoHcyase) (EC 3.3.1.1) (S-adenosyl-L-homocysteine hydrolase)
TCONS_00006062	863.04	-0.634633	0.28927	-2.19391	0.0282417	0.103006	P35684	60S ribosomal protein L3
TCONS_00006971	691.899	-0.380324	0.319694	-1.18965	0.234185	0.408058	P37399	ATP synthase subunit beta, mitochondrial (EC 7.1.2.2)
TCONS_00016153	424.275	-0.691744	0.280232	-2.46847	0.0135692	0.0646082	P42791	60S ribosomal protein L18-2
TCONS_00014253	471.161	-0.845248	0.252946	-3.34162	0.000832922	0.00941189	P46295	40S ribosomal protein S14
TCONS_00004862	281.539	0.866367	0.379879	2.28064	0.0225699	0.0885096	P46436	Glutathione S-transferase 1 (EC 2.5.1.18) (GST class-sigma)
TCONS_00010679	269.105	-0.456684	0.28259	-1.61607	0.10608	0.24421	P49210	60S ribosomal protein L9
TCONS_00000232	185	0.951265	0.482044	1.9734	0.0484501	0.146615	P49448	Glutamate dehydrogenase 2, mitochondrial (GDH 2) (EC 1.4.1.3)
TCONS_00001347	497.351	-0.483351	0.335117	-1.44234	0.149207	0.305597	P49693	60S ribosomal protein L19-3
TCONS_00009605	176.932	-0.0578143	0.371952	-0.155435	0.876479	0.929194	P52427	Proteasome subunit alpha type-4 (20S proteasome alpha subunit C) (20S proteasome subunit alpha-3) (Proteasome 27 kDa subunit)
TCONS_00003500	326.428	-0.625982	0.319792	-1.95747	0.0502924	0.150347	P59232	Ubiquitin-40S ribosomal protein S27a-2 [Cleaved into: Ubiquitin; 40S ribosomal protein S27a-2]
TCONS_00002082	5.33525	0.291416	0.694289	0.419733	0.674681	0.795761	P62829	60S ribosomal protein L23 (60S ribosomal protein L17) (Large ribosomal subunit protein uL14)
TCONS_00007524	484.877	-0.854709	0.340892	-2.50727	0.0121667	0.060408	Q08682	40S ribosomal protein Sa-1 (Laminin receptor homolog) (p40)
TCONS_00009543	132.117	-0.111654	0.402158	-0.277637	0.781291	0.866236	Q0J006	Proteasome subunit alpha type-7-B (20S proteasome alpha subunit D-2) (20S proteasome subunit alpha-4-B)
TCONS_00000089	4618.44	0.356304	0.288435	1.2353	0.216719	0.386637	Q42434	Luminal-binding protein (BiP) (78 kDa glucose-regulated protein homolog) (GRP-78)
TCONS_00010312	683.634	-0.569729	0.277803	-2.05084	0.0402825	0.130042	Q42971	Enolase (EC 4.2.1.11) (2-phospho-D-glycerate hydro-lyase) (2-phosphoglycerate dehydratase) (OSE1)
TCONS_00010459	352.474	-0.255361	0.28836	-0.885563	0.375853	0.550209	Q8RW90	Fumarylacetoacetase (EC 3.7.1.2) (Fumarylacetoacetate hydrolase) (AtFAH) (Protein SHORT-DAY SENSITIVE CELL DEATH 1)
TCONS_00006798	6715.56	1.57909	0.442463	3.56887	0.000358525	0.00532567	Q8W171	Peptidyl-prolyl cis-trans isomerase 1 (PPIase 1) (EC 5.2.1.8) (Cyclophilin 1) (Cyclosporin A-binding protein 1) (Rotamase 1)
TCONS_00000173	376.671	-0.631403	0.340249	-1.85571	0.0634952	0.174789	Q8WQI5	40S ribosomal protein S8
TCONS_00013180	70.9417	1.66883	0.457816	3.64521	0.000267174	0.00439544	Q9LDQ7	S-adenosylmethionine synthase (AdoMet synthase) (EC 2.5.1.6) (Methionine adenosyltransferase) (MAT)
TCONS_00006304	1109.93	0.484281	0.414053	1.16961	0.242158	0.415469	Q9LHQ5	Probable histone H2A.2 (HTA13)
TCONS_00007773	334.804	-0.732206	0.295412	-2.4786	0.0131901	0.0635658	Q9LR33	60S ribosomal protein L27a-2
TCONS_00011451	144.059	-0.400456	0.336742	-1.18921	0.234358	0.408206	Q9M2F1	40S ribosomal protein S27-2
TCONS_00005627	248.15	-0.61414	0.325664	-1.88581	0.0593204	0.167578	Q9M5M6	60S ribosomal protein L30
TCONS_00006863	779.2	0.0110761	0.245992	0.0450264	0.964086	0.979884	Q9SPB3	60S ribosomal protein L10 (QM protein homolog)
TCONS_00003954	105.198	0.461829	0.460275	1.00338	0.31568	0.49325	Q9U7D0	Histone H4
TCONS_00011277	401.878	-0.643117	0.261016	-2.4639	0.0137436	0.0652628	Q9ZNS1	40S ribosomal protein S7
TCONS_00012154	623.588	1.37171	0.559973	2.4496	0.0143015	0.0668471	Q9ZVQ4	Glutathione S-transferase Z2 (AtGSTZ2) (EC 2.5.1.18) (GST class-zeta member 2)
TCONS_00012158	29.6039	-0.474998	0.450535	-1.0543	0.291747	0.470065	A0A096XTY6	Ribosomal protein S3
TCONS_00004388	14.7058	3.52229	0.655249	5.37549	7.63744e-08	2.16394e-05	A0A0G4IGF6	Uncharacterized protein
TCONS_00004389	11.9514	1.84213	0.599662	3.07195	0.00212667	0.0182593	A0A0G4IGF6	Uncharacterized protein
TCONS_00001543	32.296	-1.07261	0.493922	-2.17162	0.0298842	0.106929	A0A0G4IGG6	TFA2_Winged_2 domain-containing protein (Fragment)
TCONS_00001820	72.1735	-0.120285	0.392382	-0.30655	0.759186	0.852329	A0A0G4IGU2	TLC domain-containing protein
TCONS_00002865	21.2004	-0.200544	0.599099	-0.334743	0.737819	0.839054	A0A0G4IGU8	DASH complex subunit DAM1 (Outer kinetochore protein DAM1)
TCONS_00002367	65.4435	0.88291	0.398943	2.21312	0.0268893	0.0994214	A0A0G4IGY2	DDE Tnp4 domain-containing protein
TCONS_00000966	217.713	0.623248	0.374489	1.66426	0.09606	0.228857	A0A0G4IHA9	Uncharacterized protein
TCONS_00004875	90.102	-0.595528	0.314614	-1.89289	0.0583731	0.165878	A0A0G4IHB3	Uncharacterized protein
TCONS_00002733	29.8685	-1.42335	0.565315	-2.5178	0.0118091	0.059212	A0A0G4IHQ7	RNA-directed DNA polymerase (EC 2.7.7.49) (Fragment)
TCONS_00004514	5.16594	1.44634	0.760425	1.90201	0.0571696	0.163739	A0A0G4IHQ7	RNA-directed DNA polymerase (EC 2.7.7.49) (Fragment)
TCONS_00004515	6.9187	0.914029	0.68269	1.33886	0.180615	0.344995	A0A0G4IHQ7	RNA-directed DNA polymerase (EC 2.7.7.49) (Fragment)
TCONS_00001728	41.9804	-0.193108	0.418559	-0.461364	0.644538	0.773931	A0A0G4IHZ3	SUZ domain-containing protein
TCONS_00005105	5.254	1.03048	0.71076	1.44982	0.147107	0.302763	A0A0G4II40	Uncharacterized protein
TCONS_00005093	3.82807	0.566707	0.802064	0.70656	0.47984	0.646377	A0A0G4II40	Uncharacterized protein
TCONS_00005087	160.454	1.6576	0.581775	2.84922	0.00438264	0.0308722	A0A0G4II85	Chitin-binding type-1 domain-containing protein
TCONS_00005089	34.7345	1.6738	0.62327	2.68552	0.00724171	0.0432544	A0A0G4II85	Chitin-binding type-1 domain-containing protein
TCONS_00003131	13.3422	0.227168	0.614509	0.369674	0.711625	0.82123	A0A0G4IID4	Uncharacterized protein
TCONS_00003094	40.0872	0.0438357	0.408907	0.107202	0.914629	0.952153	A0A0G4IID4	Uncharacterized protein
TCONS_00001241	18.3901	0.610602	0.532679	1.14628	0.251678	0.426706	A0A0G4IIT3	Reverse transcriptase domain-containing protein
TCONS_00004262	48.8171	1.22113	0.493369	2.47508	0.0133207	0.0638893	A0A0G4IIU5	RNA-directed DNA polymerase (EC 2.7.7.49)
TCONS_00001699	16.9729	-0.414736	0.586333	-0.707339	0.479356	0.64618	A0A0G4IIV2	Sacchrp_dh_NADP domain-containing protein
TCONS_00001243	16.0308	-0.433997	0.56558	-0.767348	0.442874	0.614192	A0A0G4IJC0	50S ribosomal protein L35
TCONS_00004152	51.4369	1.42175	0.511294	2.78069	0.00542436	0.0355581	A0A0G4IK05	Methyltransf_11 domain-containing protein
TCONS_00004599	146.636	-0.815101	0.360739	-2.25953	0.0238503	0.0918678	A0A0G4IK11	NAM-associated domain-containing protein
TCONS_00002907	28.3862	0.183577	0.504785	0.363673	0.716102	0.824531	A0A0G4IK83	Uncharacterized protein
TCONS_00003786	4.54099	1.36485	0.750691	1.81813	0.0690443	0.184552	A0A0G4IKC9	Uncharacterized protein
TCONS_00004864	149.928	-0.094937	0.365197	-0.259961	0.794894	0.875333	A0A0G4IKK0	TFIIS N-terminal domain-containing protein
TCONS_00000790	48.2381	-0.683373	0.451118	-1.51484	0.129812	0.278794	A0A0G4IKV9	APH domain-containing protein
TCONS_00001109	34.6798	-0.0304617	0.536762	-0.0567508	0.954744	0.974335	A0A0G4IL45	Uncharacterized protein
TCONS_00004466	56.3694	-0.155142	0.349538	-0.443849	0.657152	0.782933	A0A0G4IL47	Uncharacterized protein
TCONS_00004413	69.0427	-0.249117	0.423615	-0.588073	0.556484	0.708389	A0A0G4IL61	TOG domain-containing protein
TCONS_00002855	32.4639	-0.955787	0.526779	-1.8144	0.0696165	0.185693	A0A0G4ILH5	Uncharacterized protein
TCONS_00002852	7.67759	1.56858	0.662823	2.36652	0.0179564	0.0760612	A0A0G4ILH9	Uncharacterized protein
TCONS_00003225	83.3274	-0.257875	0.425721	-0.605738	0.544689	0.698121	A0A0G4ILM3	J domain-containing protein
TCONS_00001954	35.0504	-0.72175	0.408279	-1.76779	0.0770967	0.198182	A0A0G4IMF8	Uncharacterized protein
TCONS_00002995	33.3113	-0.533986	0.430196	-1.24126	0.214509	0.384698	A0A0G4IMH9	Uncharacterized protein
TCONS_00003215	93.9272	0.0259058	0.354171	0.073145	0.941691	0.968011	A0A0G4IMP9	Tubulin-specific chaperone A
TCONS_00000597	20.147	1.2546	0.519079	2.41696	0.0156506	0.0703036	A0A0G4IN11	Uncharacterized protein
TCONS_00002628	29.3461	0.0958235	0.445794	0.21495	0.829806	0.898643	A0A0G4IN86	DUF4604 domain-containing protein
TCONS_00001469	5.31767	3.07314	0.797722	3.85239	0.000116969	0.00254208	A0A0G4IN89	Calponin-homology (CH) domain-containing protein
TCONS_00001442	3.99132	0.0818622	0.795439	0.102914	0.918031	0.953685	A0A0G4IN89	Calponin-homology (CH) domain-containing protein
TCONS_00004565	12.9972	0.214226	0.599667	0.357241	0.720911	0.82795	A0A0G4IN91	Uncharacterized protein
TCONS_00002243	111.35	0.775727	0.387513	2.00181	0.0453052	0.140432	A0A0G4INA4	Uncharacterized protein
TCONS_00004506	11.3688	-0.112875	0.648416	-0.174078	0.861804	0.919626	A0A0G4INK7	Uncharacterized protein
TCONS_00000137	84.5691	-0.269994	0.431211	-0.626128	0.531231	0.687538	A0A0G4INZ1	Uncharacterized protein
TCONS_00001595	26.0837	1.23207	0.483854	2.54637	0.010885	0.0562258	A0A0G4IP62	RGS domain-containing protein
TCONS_00004876	73.9499	0.132841	0.36438	0.364568	0.715434	0.824133	A0A0G4IPD4	Uncharacterized protein
TCONS_00002451	174	0.307295	0.297813	1.03184	0.302149	0.480349	A0A0G4IQ08	Uncharacterized protein
TCONS_00004145	40.0967	-0.337987	0.497843	-0.678903	0.4972	0.661147	A0A0G4IQ20	Uncharacterized protein (Fragment)
TCONS_00004739	26.6078	-0.199866	0.519889	-0.38444	0.700652	0.813352	A0A0G4IQ26	L51_S25_CI-B8 domain-containing protein
TCONS_00000073	17.8891	0.668408	0.52799	1.26595	0.205532	0.374335	A0A0G4IQ79	Uncharacterized protein
TCONS_00002392	13.9492	-0.0475914	0.541717	-0.087853	0.929993	0.961282	A0A0G4IQB5	Uncharacterized protein
TCONS_00000171	32.0583	1.20718	0.668569	1.80562	0.0709772	0.187723	A0A0G4IQQ9	Uncharacterized protein
TCONS_00003442	9.18744	-0.46791	0.673284	-0.694966	0.487077	0.652563	A0A0G4IQR3	DDE Tnp4 domain-containing protein
TCONS_00000011	29.0761	1.86062	0.573076	3.24673	0.00116741	0.0119536	A0A0G4IQX8	RNase III domain-containing protein
TCONS_00002366	165.029	0.738793	0.408363	1.80916	0.0704268	0.186812	A0A0G4IR65	WD_REPEATS_REGION domain-containing protein
TCONS_00001086	41.7894	-0.342115	0.431133	-0.793525	0.427472	0.599589	A0A0G4IR82	t-SNARE coiled-coil homology domain-containing protein
TCONS_00004722	4110.08	1.94298	0.510917	3.80294	0.00014299	0.00294053	A0A0G4IRB7	Uncharacterized protein
TCONS_00002573	31.9438	0.66836	0.490431	1.3628	0.172945	0.335078	A0A0G4IRD9	Uncharacterized protein
TCONS_00001044	93.0841	1.03579	0.451351	2.29487	0.0217405	0.0867029	A0A0G4IRK6	Uncharacterized protein
TCONS_00004260	34.7367	-0.149233	0.486484	-0.306758	0.759028	0.852277	A0A0G4IRL0	Uncharacterized protein
TCONS_00002784	9.29094	0.858927	0.732497	1.1726	0.240956	0.414134	A0A0G4IRL5	Uncharacterized protein
TCONS_00003530	49.0697	0.0716958	0.49757	0.144092	0.885428	0.934369	A0A0G4IRM9	Uncharacterized protein
TCONS_00003275	41.8072	-0.261795	0.414474	-0.63163	0.527629	0.684998	A0A0G4IRR7	MRP-S28 domain-containing protein
TCONS_00000694	39.7725	1.30539	0.564302	2.31329	0.0207066	0.0836794	A0A0G4IRY7	PKD_channel domain-containing protein
TCONS_00001548	16.5058	1.60765	0.548073	2.93327	0.00335409	0.0253296	A0A0G4IS69	Peptidase_S26 domain-containing protein
TCONS_00001518	13.7724	-0.925707	0.610074	-1.51737	0.129174	0.277813	A0A0G4IS69	Peptidase_S26 domain-containing protein
TCONS_00000965	27.1733	-0.821203	0.514997	-1.59458	0.110807	0.251758	A0A0G4IS78	Uncharacterized protein
TCONS_00003294	828.982	-0.499624	0.278067	-1.79677	0.0723716	0.189799	A0A0G4IS84	Uncharacterized protein
TCONS_00003271	107.704	0.271238	0.419693	0.646276	0.5181	0.676723	A0A0G4ISC4	Uncharacterized protein
TCONS_00000432	20.7917	2.10918	0.624986	3.37477	0.000738785	0.00881702	A0A0G4ISM9	SHR-BD domain-containing protein
TCONS_00000435	11.2402	1.89048	0.634141	2.98116	0.00287158	0.022647	A0A0G4ISM9	SHR-BD domain-containing protein
TCONS_00000437	33.7742	1.49342	0.617034	2.42031	0.0155071	0.0699465	A0A0G4ISM9	SHR-BD domain-containing protein
TCONS_00001306	113.455	1.14489	0.344056	3.32763	0.000875872	0.00972485	A0A0G4IST3	PAS domain-containing protein
TCONS_00003045	29.4986	0.950308	0.524604	1.81148	0.0700669	0.186395	A0A0G4ISV8	Uncharacterized protein
TCONS_00003988	8.77098	-0.980144	0.630782	-1.55386	0.120219	0.265485	A0A0G4IT99	CBF domain-containing protein
TCONS_00003984	43.8055	1.80518	0.452858	3.98619	6.71432e-05	0.00180601	A0A0G4ITD6	HPt domain-containing protein
TCONS_00003985	135.989	1.14412	0.35914	3.18571	0.00144398	0.0141078	A0A0G4ITD6	HPt domain-containing protein
TCONS_00002826	9.17114	-0.0459625	0.653907	-0.0702891	0.943964	0.969175	A0A0G4ITI2	Uncharacterized protein
TCONS_00000723	14.4521	0.385705	0.551228	0.699719	0.484103	0.649947	A0A0G4ITT3	RNA-directed DNA polymerase (EC 2.7.7.49)
TCONS_00002240	11.279	0.636043	0.608171	1.04583	0.29564	0.474437	A0A0G4ITX2	Uncharacterized protein
TCONS_00004696	106.564	0.927467	0.322028	2.88008	0.0039757	0.0286655	A0A0G4IU57	BTB domain-containing protein
TCONS_00002797	25.6968	0.0862678	0.492372	0.175209	0.860916	0.919448	A0A0G4IU63	ER membrane protein complex subunit 10
TCONS_00002682	19.5945	1.16084	0.599505	1.93633	0.0528271	0.155195	A0A0G4IUE9	Uncharacterized protein
TCONS_00003140	19.8051	0.412308	0.539448	0.764315	0.44468	0.61573	A0A0G4IUH4	Uncharacterized protein
TCONS_00003841	21.2807	-0.501122	0.514706	-0.973608	0.330251	0.508232	A0A0G4IV06	Usp domain-containing protein
TCONS_00000538	4.84515	0.31549	0.727507	0.433659	0.664536	0.788998	A0A0G4IV55	Uncharacterized protein
TCONS_00004645	7.55973	0.923059	0.68486	1.34781	0.177721	0.34117	A0A0G4IV93	Uncharacterized protein
TCONS_00004037	7.08449	0.0637587	0.687581	0.092729	0.926119	0.959221	A0A0G4IVH1	Uncharacterized protein (Fragment)
TCONS_00002603	84.8411	1.31755	0.383485	3.43572	0.000590972	0.00759821	A0A0G4IVS4	Uncharacterized protein
TCONS_00002463	20.7876	-0.527287	0.508233	-1.03749	0.299507	0.477639	A0A0G4IVT1	Uncharacterized protein
TCONS_00001406	15.2779	-0.81053	0.585716	-1.38383	0.166411	0.327261	A0A0G4IVT6	Uncharacterized protein
TCONS_00002466	35.3228	-0.69189	0.448036	-1.54427	0.122522	0.268797	A0A0G4IVV9	Uncharacterized protein
TCONS_00004143	330.966	0.212426	0.319172	0.665551	0.505698	0.666998	A0A0G4IW68	DUF1664 domain-containing protein
TCONS_00003279	5.70997	-1.30168	0.753066	-1.72851	0.0838972	0.20872	A0A0G4IWM9	TPR_REGION domain-containing protein
TCONS_00004297	22.5282	-0.603896	0.553886	-1.09029	0.275586	0.452493	A0A0G4IX21	4HBT domain-containing protein
TCONS_00003356	60.4433	1.28274	0.431216	2.97471	0.0029327	0.0229868	A0A0G4IXE8	Uncharacterized protein
TCONS_00003397	12.9015	-0.0706026	0.607554	-0.116208	0.907488	0.947881	A0A0G4IXN4	Uncharacterized protein
TCONS_00001739	17.6316	0.0538044	0.507155	0.106091	0.91551	0.952489	A0A0G4IXQ7	Uncharacterized protein
TCONS_00003758	17.8104	1.66002	0.570169	2.91146	0.00359748	0.0267711	A0A0G4IXS3	Uncharacterized protein
TCONS_00001879	33.438	-0.101455	0.493834	-0.205443	0.837226	0.903988	A0A0G4IXT4	Uncharacterized protein
TCONS_00001907	36.0132	2.97553	0.47667	6.24232	4.3113e-10	8.24537e-07	A0A0G4IXT8	Uncharacterized protein
TCONS_00003089	15.7127	1.18254	0.589862	2.00478	0.0449862	0.140124	A0A0G4IY19	Uncharacterized protein
TCONS_00003860	6.00089	0.879203	0.71204	1.23477	0.216917	0.386696	A0A0G4IY28	Uncharacterized protein
TCONS_00000463	19.9286	1.55585	0.553875	2.80902	0.00496921	0.0335227	A0A0G4IY65	Uncharacterized protein
TCONS_00003393	3.94808	0.0136496	0.793212	0.0172081	0.986271	0.992651	A0A0G4IZE4	Uncharacterized protein
TCONS_00000251	8.03673	1.65412	0.701208	2.35896	0.0183262	0.0768753	A0A0G4J090	Peptidase A1 domain-containing protein
TCONS_00000954	116.54	-0.34542	0.306941	-1.12536	0.260436	0.434871	A0A0G4J0V7	Uncharacterized protein
TCONS_00000773	5.98083	-1.05616	0.686144	-1.53927	0.123739	0.270635	A0A0G4J0Z0	AhpC-TSA domain-containing protein
TCONS_00002540	93.4654	1.41781	0.464353	3.0533	0.00226338	0.0190121	A0A0G4J100	Uncharacterized protein (Fragment)
TCONS_00002703	93.8866	-0.256785	0.342176	-0.750447	0.452986	0.622591	A0A0G4J1F7	Uncharacterized protein
TCONS_00000560	18.2132	-1.06989	0.530711	-2.01595	0.0438049	0.137401	A0A0G4J1H2	BACON domain-containing protein
TCONS_00004032	57.3991	0.915693	0.436725	2.09673	0.0360176	0.120902	A0A0G4J1R3	Uncharacterized protein
TCONS_00001489	70.3862	0.800059	0.4106	1.94851	0.0513535	0.152217	A0A0G4J1T6	Uncharacterized protein
TCONS_00003350	4236.44	2.09393	0.540778	3.87207	0.000107915	0.00242097	A0A0G4J217	Uncharacterized protein
TCONS_00004290	11.3951	-0.332455	0.623586	-0.533135	0.59394	0.735932	A0A0G4J236	BPL/LPL catalytic domain-containing protein
TCONS_00003394	39.9301	1.28155	0.47848	2.67839	0.00739781	0.0438707	A0A0G4J251	Uncharacterized protein
TCONS_00002021	4.1152	-0.00428088	0.762163	-0.00561674	0.995519	0.997997	A0A0G4J282	Uncharacterized protein (Fragment)
TCONS_00001124	18.8434	1.38242	0.575845	2.40068	0.0163646	0.0717418	A0A0G4J288	Uncharacterized protein
TCONS_00004836	109.243	-0.244949	0.302839	-0.808842	0.418606	0.591481	A0A0G4J2R1	Complex I-B14.7 (NADH dehydrogenase [ubiquinone] 1 alpha subcomplex subunit 11) (NADH-ubiquinone oxidoreductase subunit B14.7)
TCONS_00003906	66.9729	1.17559	0.419204	2.80435	0.00504177	0.0339521	A0A0G4J2X3	RNA-directed DNA polymerase (EC 2.7.7.49) (Fragment)
TCONS_00003192	4.28077	1.04217	0.782591	1.3317	0.18296	0.348084	A0A0G4J2X3	RNA-directed DNA polymerase (EC 2.7.7.49) (Fragment)
TCONS_00001920	5.54158	-0.577029	0.738895	-0.780935	0.434841	0.605816	A0A0G4J316	ATP_transf domain-containing protein
TCONS_00003456	43.9034	-0.715426	0.383928	-1.86344	0.0624004	0.172534	A0A0G4J364	MOR2-PAG1_N domain-containing protein
TCONS_00003584	81.2863	1.42713	0.411605	3.46723	0.000525844	0.00694602	A0A0G4J3F8	Leucine-rich repeat-containing protein 51
TCONS_00004417	8.11059	2.76755	0.70478	3.92683	8.60732e-05	0.00212406	A0A0G4J3I9	Uncharacterized protein
TCONS_00000010	7.78789	-0.778961	0.661284	-1.17795	0.238816	0.41203	A0A0G4J3J3	Uncharacterized protein
TCONS_00004027	42.173	-0.10028	0.425905	-0.235451	0.813859	0.889431	A0A0G4J3W7	Uncharacterized protein
TCONS_00003977	48.8299	-0.680525	0.409123	-1.66338	0.0962373	0.229065	A0A0G4J465	t-SNARE coiled-coil homology domain-containing protein
TCONS_00000274	22.2196	0.278026	0.516866	0.537906	0.590642	0.733746	A0A0G4J4F0	Uncharacterized protein
TCONS_00002777	20.8881	0.11774	0.484515	0.243005	0.808002	0.884673	A0A0G4J4F2	Uncharacterized protein
TCONS_00004344	196.81	0.795927	0.393599	2.02217	0.0431583	0.136071	A0A0G4J4K4	Uncharacterized protein (Fragment)
TCONS_00001457	195.896	0.863792	0.40929	2.11047	0.0348181	0.118172	A0A0G4J5M6	Uncharacterized protein
TCONS_00002559	166.674	1.79619	0.412814	4.35109	1.35465e-05	0.00070067	A0A0G4J5Z8	C2H2-type domain-containing protein
TCONS_00004635	36.905	1.26268	0.50591	2.49586	0.0125651	0.0613814	A0A0G4J5Z8	C2H2-type domain-containing protein
TCONS_00001802	37.3327	-0.0417101	0.528512	-0.0789199	0.937096	0.965493	A0A0G4J607	BHLH domain-containing protein
TCONS_00000656	173.413	-0.975201	0.309258	-3.15336	0.00161403	0.0152832	A0A0G4J610	Uncharacterized protein
TCONS_00003956	94.3356	0.804169	0.403036	1.99528	0.0460129	0.141992	A0A0G4J654	SAS-6_N domain-containing protein
TCONS_00004988	1920.87	1.70233	0.460475	3.6969	0.000218249	0.00384702	A0A0G4J682	Uncharacterized protein
TCONS_00004987	1025.36	1.68028	0.500344	3.35824	0.000784403	0.0091099	A0A0G4J682	Uncharacterized protein
TCONS_00003132	18.7756	0.882786	0.608075	1.45177	0.146565	0.302391	A0A0G4J684	Uncharacterized protein
TCONS_00002157	130.956	1.63118	0.458205	3.55993	0.000370959	0.0054469	A0A0G4J6D0	Tyrosine-protein phosphatase domain-containing protein
TCONS_00001636	1681.52	2.11933	0.576609	3.67551	0.000237374	0.00410555	A0A0G4J6P5	Uncharacterized protein
TCONS_00003979	96.0011	-0.702287	0.402564	-1.74454	0.0810658	0.204267	A0A0G4J786	1,3-beta-glucan synthase (EC 2.4.1.34)
TCONS_00001888	19.781	0.024905	0.54553	0.0456528	0.963587	0.979724	A0A0G4J882	SAP domain-containing protein (Fragment)
TCONS_00000384	37.6371	-0.570337	0.44466	-1.28263	0.19962	0.367385	A0A0G4J893	Uncharacterized protein
TCONS_00000345	560.324	1.51322	0.546398	2.76944	0.00561521	0.0363421	A0A0G4J8U1	Uncharacterized protein
TCONS_00004465	6.23272	-0.887522	0.714898	-1.24147	0.214434	0.384698	A0A0G4J957	Reverse transcriptase domain-containing protein (Fragment)
TCONS_00003148	379.601	1.34047	0.577366	2.32171	0.0202487	0.0823073	A0A0H2VDN9	Secretory immunoglobulin A-binding protein EsiB
TCONS_00013220	6.7639	0.35211	0.733686	0.47992	0.631284	0.76486	A0A0H5QEJ5	Uncharacterized protein
TCONS_00011447	5.0912	0.987849	0.782179	1.26294	0.206609	0.375252	A0A0H5QEL2	Uncharacterized protein (Fragment)
TCONS_00007984	1261.25	1.35403	0.459174	2.94884	0.00318965	0.024432	A0A0H5QEM5	Fibronectin type-III domain-containing protein (Fragment)
TCONS_00009756	170.592	1.28404	0.381098	3.36931	0.000753564	0.00889891	A0A0H5QEU8	Uncharacterized protein (Fragment)
TCONS_00010989	28.0232	2.20704	0.515739	4.27937	1.87426e-05	0.00085857	A0A0H5QEV7	Uncharacterized protein
TCONS_00013311	7.05894	0.963959	0.700095	1.3769	0.168544	0.329187	A0A0H5QEV7	Uncharacterized protein
TCONS_00014062	9.90701	-0.331194	0.645543	-0.513047	0.607919	0.747561	A0A0H5QEV7	Uncharacterized protein
TCONS_00016593	21.2609	-0.17451	0.503732	-0.346434	0.729017	0.833269	A0A0H5QEV7	Uncharacterized protein
TCONS_00010007	4.30801	-0.242899	0.804977	-0.301746	0.762846	0.854328	A0A0H5QEW6	Uncharacterized protein (Fragment)
TCONS_00007287	64.9658	0.43376	0.404214	1.07309	0.283229	0.461	A0A0H5QEX1	Uncharacterized protein (Fragment)
TCONS_00002071	70.7564	1.70439	0.576288	2.95753	0.00310117	0.0239878	A0A0H5QEY4	Uncharacterized protein (Fragment)
TCONS_00001055	31.2476	0.959995	0.485596	1.97694	0.0480482	0.146092	A0A0H5QF14	Uncharacterized protein (Fragment)
TCONS_00016269	6.05043	-0.258637	0.78024	-0.331484	0.740279	0.840227	A0A0H5QF19	Uncharacterized protein (Fragment)
TCONS_00006601	15.362	0.520538	0.564623	0.92192	0.35657	0.532973	A0A0H5QF35	Uncharacterized protein (Fragment)
TCONS_00005688	70.4503	0.629816	0.609659	1.03306	0.301575	0.479735	A0A0H5QF48	Uncharacterized protein (Fragment)
TCONS_00012702	74.6551	0.437527	0.445455	0.9822	0.326001	0.503616	A0A0H5QF51	Uncharacterized protein (Fragment)
TCONS_00004240	5.87546	1.83287	0.724375	2.53028	0.011397	0.0578143	A0A0H5QF56	Uncharacterized protein
TCONS_00011224	83.012	0.381069	0.439906	0.866251	0.386353	0.558942	A0A0H5QF73	Uncharacterized protein (Fragment)
TCONS_00006148	136.487	0.920473	0.435956	2.11139	0.0347388	0.118007	A0A0H5QF83	Uncharacterized protein
TCONS_00011753	56.6778	0.608595	0.452506	1.34494	0.178643	0.342306	A0A0H5QF88	Uncharacterized protein (Fragment)
TCONS_00010636	60.4167	-0.139338	0.409863	-0.339964	0.733884	0.836319	A0A0H5QF91	bVLRF1 domain-containing protein (Fragment)
TCONS_00002095	34.4709	-0.560436	0.41191	-1.36058	0.173646	0.335707	A0A0H5QFA1	J domain-containing protein (Fragment)
TCONS_00012725	15.178	-1.22121	0.564636	-2.16283	0.0305545	0.108465	A0A0H5QFA6	AP2/ERF domain-containing protein (Fragment)
TCONS_00005683	16.9715	0.033866	0.571461	0.0592621	0.952743	0.973614	A0A0H5QFD2	Uncharacterized protein
TCONS_00008662	7.35871	0.132059	0.649624	0.203285	0.838913	0.90478	A0A0H5QFE1	Uncharacterized protein
TCONS_00000805	25.0112	0.471599	0.558135	0.844956	0.398135	0.569829	A0A0H5QFE3	Uncharacterized protein (Fragment)
TCONS_00009071	49.9822	-1.01648	0.392063	-2.59264	0.00952428	0.0522943	A0A0H5QFF3	RING-type domain-containing protein
TCONS_00005148	20.5097	0.998338	0.481877	2.07177	0.0382871	0.125659	A0A0H5QFF7	Uncharacterized protein (Fragment)
TCONS_00008678	6.02858	0.68724	0.700408	0.9812	0.326494	0.504041	A0A0H5QFF7	Uncharacterized protein (Fragment)
TCONS_00000174	96.4023	0.498601	0.363831	1.37042	0.170556	0.33166	A0A0H5QFG9	Endo/exonuclease/phosphatase domain-containing protein
TCONS_00016270	11.7599	-1.18531	0.644064	-1.84036	0.0657159	0.178779	A0A0H5QFH0	Uncharacterized protein (Fragment)
TCONS_00013356	22.8792	0.933245	0.604714	1.54328	0.122762	0.269014	A0A0H5QFH0	Uncharacterized protein (Fragment)
TCONS_00009303	41.6509	-1.14477	0.463704	-2.46876	0.0135583	0.0646082	A0A0H5QFK7	Uncharacterized protein (Fragment)
TCONS_00008924	445.233	-0.114399	0.281773	-0.405998	0.684744	0.802435	A0A0H5QFL2	Transket_pyr domain-containing protein (Fragment)
TCONS_00011101	65.2123	-0.333101	0.357981	-0.9305	0.352112	0.529011	A0A0H5QFM3	Uncharacterized protein
TCONS_00001068	6.25215	-1.80109	0.736917	-2.44408	0.0145221	0.0672483	A0A0H5QFN5	PH domain-containing protein (Fragment) OS=Spongospora subterranea OX=70186 PE=4 SV=1
TCONS_00002522	18.8938	-0.249817	0.500341	-0.499294	0.617572	0.75615	A0A0H5QFN9	Uncharacterized protein (Fragment)
TCONS_00015305	509.938	-0.274771	0.264825	-1.03756	0.299477	0.477639	A0A0H5QFP3	Uncharacterized protein
TCONS_00009619	68.2751	0.281003	0.344187	0.816425	0.414257	0.586647	A0A0H5QFP5	Uncharacterized protein (Fragment)
TCONS_00007357	148.905	-0.460723	0.301276	-1.52924	0.126205	0.273815	A0A0H5QFR1	Rab-GAP TBC domain-containing protein (Fragment)
TCONS_00013992	67.3854	-0.328517	0.439543	-0.747407	0.454818	0.624189	A0A0H5QFS7	Uncharacterized protein (Fragment)
TCONS_00004072	107.294	-0.288521	0.328618	-0.877984	0.379953	0.553329	A0A0H5QFT2	Uncharacterized protein
TCONS_00012818	82.3024	-0.0151847	0.369982	-0.0410417	0.967263	0.982025	A0A0H5QFT5	Uncharacterized protein (Fragment)
TCONS_00003046	6.78389	-0.360091	0.661074	-0.544706	0.585956	0.730525	A0A0H5QFT9	Uncharacterized protein
TCONS_00011514	15.4562	-0.0834648	0.540249	-0.154493	0.877221	0.929594	A0A0H5QFU0	Uncharacterized protein (Fragment)
TCONS_00004895	11.9727	-0.165559	0.633183	-0.261472	0.793729	0.875071	A0A0H5QFU3	Uncharacterized protein
TCONS_00009987	4.90798	-1.49143	0.785873	-1.8978	0.0577219	0.164766	A0A0H5QFU7	Uncharacterized protein (Fragment)
TCONS_00003822	6.70414	0.0527131	0.684691	0.0769882	0.938633	0.966165	A0A0H5QFU8	Uncharacterized protein (Fragment)
TCONS_00000376	43.7808	2.46682	0.512901	4.80956	1.51266e-06	0.000186642	A0A0H5QFV0	Uncharacterized protein
TCONS_00000075	8.97155	0.281144	0.607056	0.463127	0.643273	0.773749	A0A0H5QFV9	Uncharacterized protein
TCONS_00004608	4.38454	0.497331	0.803466	0.618983	0.535928	0.691141	A0A0H5QFW8	Uncharacterized protein (Fragment)
TCONS_00008345	34.7475	0.598614	0.466362	1.28358	0.199289	0.366922	A0A0H5QFX0	Uncharacterized protein
TCONS_00005807	44.1386	0.778058	0.638093	1.21935	0.222712	0.393384	A0A0H5QFY8	Uncharacterized protein (Fragment)
TCONS_00014817	23.2126	-1.34873	0.534768	-2.52208	0.0116664	0.058793	A0A0H5QFZ4	Uncharacterized protein (Fragment)
TCONS_00007323	9.41087	1.44157	0.690942	2.08638	0.0369444	0.12272	A0A0H5QFZ7	Uncharacterized protein (Fragment)
TCONS_00008664	15.7657	-0.571293	0.594832	-0.960427	0.33684	0.513927	A0A0H5QFZ9	Uncharacterized protein (Fragment)
TCONS_00011174	17.5074	-0.927443	0.544082	-1.7046	0.0882686	0.215943	A0A0H5QG03	Uncharacterized protein
TCONS_00011173	19.3617	-0.621533	0.512268	-1.2133	0.225017	0.396631	A0A0H5QG03	Uncharacterized protein
TCONS_00011890	41.0434	1.45469	0.475312	3.0605	0.00220969	0.0187542	A0A0H5QG05	Uncharacterized protein (Fragment)
TCONS_00013843	505.82	0.518756	0.337655	1.53635	0.124453	0.271631	A0A0H5QG30	Uncharacterized protein
TCONS_00008848	2378.22	2.09158	0.486616	4.29821	1.72183e-05	0.000833669	A0A0H5QG32	PDEase domain-containing protein (Fragment)
TCONS_00005546	150.417	0.917005	0.420658	2.17993	0.0292625	0.105544	A0A0H5QG32	PDEase domain-containing protein (Fragment)
TCONS_00009211	16.6672	-0.429027	0.559555	-0.76673	0.443242	0.614318	A0A0H5QG38	Uncharacterized protein (Fragment)
TCONS_00005897	9.15833	-0.159206	0.710109	-0.224199	0.822603	0.895533	A0A0H5QG40	Uncharacterized protein
TCONS_00007185	72.5267	1.91069	0.405632	4.7104	2.47227e-06	0.000225153	A0A0H5QG41	Uncharacterized protein (Fragment)
TCONS_00012804	51.0571	-0.0791002	0.690049	-0.11463	0.908739	0.948669	A0A0H5QG49	Uncharacterized protein (Fragment)
TCONS_00014517	280.949	-0.810886	0.291441	-2.78233	0.005397	0.03547	A0A0H5QG59	Uncharacterized protein (Fragment)
TCONS_00016820	105.513	-0.91809	0.371098	-2.47398	0.0133616	0.063965	A0A0H5QG62	Uncharacterized protein (Fragment)
TCONS_00015998	429.19	-0.91988	0.264952	-3.47187	0.000516851	0.00687636	A0A0H5QG66	Uncharacterized protein
TCONS_00001431	1121.63	1.84996	0.47555	3.89016	0.000100179	0.00232234	A0A0H5QG73	Uncharacterized protein (Fragment)
TCONS_00012925	7108.67	1.85707	0.47579	3.90314	9.49537e-05	0.00228426	A0A0H5QG77	L-type lectin-like domain-containing protein
TCONS_00011867	9503.71	1.94575	0.538048	3.61632	0.000298827	0.00470375	A0A0H5QG88	Uncharacterized protein (Fragment)
TCONS_00010445	37.7442	-0.768047	0.452654	-1.69677	0.0897411	0.218408	A0A0H5QG92	Uncharacterized protein
TCONS_00009718	30.587	-0.822299	0.509826	-1.6129	0.106766	0.245078	A0A0H5QGA2	Uncharacterized protein (Fragment)
TCONS_00006946	32.6596	1.17717	0.498453	2.36165	0.0181936	0.0766838	A0A0H5QGB3	Uncharacterized protein (Fragment)
TCONS_00011221	66.1213	-0.470464	0.364344	-1.29126	0.196612	0.363568	A0A0H5QGC6	Mediator of RNA polymerase II transcription subunit 13
TCONS_00008969	196.409	0.289336	0.318425	0.908647	0.363537	0.540011	A0A0H5QGD1	Uncharacterized protein (Fragment)
TCONS_00007901	30.6668	-1.01626	0.472872	-2.14913	0.0316243	0.110721	A0A0H5QGD7	Uncharacterized protein (Fragment)
TCONS_00016727	398.897	-0.259196	0.267843	-0.967719	0.333185	0.510794	A0A0H5QGD8	ANK_REP_REGION domain-containing protein (Fragment)
TCONS_00016889	1937.75	-0.654875	0.266436	-2.45791	0.0139748	0.0659108	A0A0H5QGE7	Uncharacterized protein (Fragment)
TCONS_00007986	6.50224	-0.474694	0.698205	-0.679879	0.496581	0.660986	A0A0H5QGE8	Uncharacterized protein
TCONS_00000410	10.3275	0.755213	0.613534	1.23092	0.218352	0.388102	A0A0H5QGF1	Uncharacterized protein
TCONS_00016869	914.24	-0.0895395	0.322122	-0.277968	0.781037	0.866236	A0A0H5QGF7	Uncharacterized protein (Fragment)
TCONS_00012737	298.784	-0.652817	0.808759	-0.807184	0.41956	0.592403	A0A0H5QGG5	Uncharacterized protein
TCONS_00001349	17.074	1.46272	0.560868	2.60796	0.00910838	0.0505287	A0A0H5QGH6	EH domain-containing protein
TCONS_00001320	11.183	0.563583	0.720692	0.782003	0.434213	0.605668	A0A0H5QGH6	EH domain-containing protein
TCONS_00010560	19.5055	1.38708	0.551388	2.51562	0.0118822	0.0593915	A0A0H5QGH9	DDE_3 domain-containing protein (Fragment)
TCONS_00009533	10.6767	-0.129746	0.617215	-0.210212	0.833502	0.901497	A0A0H5QGH9	DDE_3 domain-containing protein (Fragment)
TCONS_00010067	12.7474	0.716668	0.599034	1.19637	0.231551	0.404792	A0A0H5QGI2	Uncharacterized protein
TCONS_00013000	130.381	-1.0215	0.35264	-2.89673	0.00377069	0.02763	A0A0H5QGI3	BPL_N domain-containing protein
TCONS_00003689	14.8161	0.801456	0.639243	1.25376	0.20993	0.379302	A0A0H5QGK1	Uncharacterized protein
TCONS_00003688	4.42665	0.389096	0.780785	0.49834	0.618245	0.756388	A0A0H5QGK1	Uncharacterized protein
TCONS_00013469	19.6249	0.0694036	0.650697	0.10666	0.915059	0.952153	A0A0H5QGK1	Uncharacterized protein
TCONS_00008916	59.9845	0.0366817	0.398391	0.0920744	0.926639	0.9595	A0A0H5QGK9	Uncharacterized protein
TCONS_00016920	15.4001	1.68111	0.657399	2.55722	0.0105512	0.0553234	A0A0H5QGL4	Uncharacterized protein (Fragment)
TCONS_00014725	66.0042	-0.508371	0.360951	-1.40842	0.159007	0.31805	A0A0H5QGM3	ER membrane protein complex subunit 2
TCONS_00012506	43.3703	-0.158476	0.415397	-0.381506	0.702828	0.814395	A0A0H5QGM6	PHD domain-containing protein
TCONS_00012543	141.266	1.80883	0.539095	3.35531	0.000792755	0.00917485	A0A0H5QGN2	Uncharacterized protein
TCONS_00013262	29.8133	0.886165	0.573389	1.54549	0.122228	0.268306	A0A0H5QGN6	Uncharacterized protein (Fragment)
TCONS_00007682	7.27542	1.01684	0.645781	1.5746	0.11535	0.258472	A0A0H5QGN7	Uncharacterized protein
TCONS_00009138	29.5497	-0.134531	0.534847	-0.251532	0.801403	0.880346	A0A0H5QGP7	Uncharacterized protein
TCONS_00014831	7.33804	-0.994785	0.673136	-1.47784	0.139452	0.292918	A0A0H5QGP8	Uncharacterized protein (Fragment)
TCONS_00011260	9.1752	0.409234	0.67218	0.608816	0.542646	0.696518	A0A0H5QGQ1	C2H2-type domain-containing protein (Fragment)
TCONS_00013880	5.18167	-1.21728	0.737949	-1.64955	0.0990352	0.233761	A0A0H5QGQ4	Uncharacterized protein
TCONS_00001419	38.585	-0.642187	0.447501	-1.43505	0.151272	0.308267	A0A0H5QGR0	Uncharacterized protein
TCONS_00010997	22.4355	-0.869597	0.515035	-1.68842	0.09133	0.221029	A0A0H5QGR6	PCIF1_WW domain-containing protein (Fragment)
TCONS_00009457	32.9254	0.00895971	0.492496	0.0181924	0.985485	0.99223	A0A0H5QGR7	Trafficking protein particle complex subunit
TCONS_00015029	61.8594	0.910024	0.346316	2.62772	0.00859581	0.0484227	A0A0H5QGR9	Uncharacterized protein
TCONS_00015814	8.26715	-0.100624	0.686931	-0.146483	0.88354	0.933457	A0A0H5QGS0	Uncharacterized protein (Fragment)
TCONS_00015813	15.8309	-0.0718956	0.536056	-0.13412	0.893308	0.939499	A0A0H5QGS0	Uncharacterized protein (Fragment)
TCONS_00012459	27.7359	0.19333	0.490331	0.394284	0.693371	0.808951	A0A0H5QGS5	Uncharacterized protein
TCONS_00006575	59.8797	0.0702926	0.477025	0.147356	0.882851	0.933279	A0A0H5QGS7	Uncharacterized protein (Fragment)
TCONS_00006314	33.3662	0.220312	0.457463	0.481595	0.630093	0.764269	A0A0H5QGT9	Nudix hydrolase domain-containing protein (Fragment)
TCONS_00009641	62.5062	0.94657	0.524488	1.80475	0.0711137	0.187723	A0A0H5QGU0	FAD_binding_3 domain-containing protein
TCONS_00009572	53.1584	1.21982	0.487153	2.50398	0.0122805	0.060532	A0A0H5QGU1	GAF domain-containing protein
TCONS_00013481	21.5821	-0.412383	0.479343	-0.860309	0.389619	0.56219	A0A0H5QGU2	Uncharacterized protein
TCONS_00006976	10.1828	-0.254254	0.608531	-0.417817	0.676081	0.796431	A0A0H5QGU4	5'-3' exoribonuclease (EC 3.1.13.-)
TCONS_00003817	40.8092	-0.496282	0.476098	-1.0424	0.297229	0.475591	A0A0H5QGV1	Uncharacterized protein (Fragment)
TCONS_00003559	108.425	0.805015	0.46058	1.74783	0.0804937	0.2039	A0A0H5QGV2	Uncharacterized protein (Fragment)
TCONS_00001687	37.9668	2.17234	0.551869	3.93634	8.2734e-05	0.00207084	A0A0H5QGV4	Uncharacterized protein
TCONS_00015035	50.3564	-0.403986	0.387897	-1.04148	0.297654	0.475773	A0A0H5QGV5	Uncharacterized protein (Fragment)
TCONS_00005888	33.2811	-0.536625	0.452235	-1.18661	0.235383	0.40906	A0A0H5QGW2	Uncharacterized protein
TCONS_00016037	436.32	1.97121	0.426314	4.62385	3.76673e-06	0.000303321	A0A0H5QGW4	Uncharacterized protein (Fragment)
TCONS_00006016	84.44	0.0548752	0.395807	0.138641	0.889734	0.9374	A0A0H5QGX0	SAM domain-containing protein (Fragment)
TCONS_00008455	80.6142	-0.293363	0.367943	-0.797306	0.425273	0.597539	A0A0H5QGX1	Uncharacterized protein
TCONS_00008669	5.64489	0.459547	0.79782	0.576004	0.564613	0.714995	A0A0H5QGX4	Uncharacterized protein (Fragment)
TCONS_00014811	57.0869	0.975676	0.450199	2.16721	0.0302187	0.107773	A0A0H5QGY1	Uncharacterized protein (Fragment)
TCONS_00002661	86.9162	0.166082	0.361775	0.459076	0.64618	0.775416	A0A0H5QGY3	Uncharacterized protein
TCONS_00006697	39.364	-0.711095	0.422964	-1.68122	0.0927206	0.2231	A0A0H5QGY9	Uncharacterized protein (Fragment)
TCONS_00007337	87.4664	2.2073	0.596052	3.70319	0.000212905	0.00379103	A0A0H5QH01	Uncharacterized protein (Fragment)
TCONS_00005311	16.6617	-1.39824	0.597128	-2.3416	0.0192012	0.0795715	A0A0H5QH07	Uncharacterized protein
TCONS_00012578	99.9764	-0.0551192	0.381699	-0.144405	0.885181	0.934276	A0A0H5QH23	Uncharacterized protein
TCONS_00004029	37.6939	-0.254214	0.438667	-0.579515	0.562242	0.713631	A0A0H5QH34	Uncharacterized protein
TCONS_00016680	19.8527	1.52636	0.623254	2.44902	0.0143246	0.0668597	A0A0H5QH50	Uncharacterized protein (Fragment)
TCONS_00008996	251.245	-0.476234	0.39323	-1.21108	0.225864	0.397849	A0A0H5QH62	Protein HGH1 homolog (Fragment)
TCONS_00008979	19.2966	-0.146078	0.515106	-0.283588	0.776726	0.863967	A0A0H5QH62	Protein HGH1 homolog (Fragment)
TCONS_00006450	97.7607	-0.224134	0.349621	-0.641076	0.521473	0.679745	A0A0H5QH64	Uncharacterized protein (Fragment)
TCONS_00010460	63.7723	-0.783415	0.363049	-2.15788	0.0309374	0.109216	A0A0H5QH67	Uncharacterized protein (Fragment)
TCONS_00009428	28.7539	0.0403286	0.465141	0.0867019	0.930908	0.962098	A0A0H5QH72	ANK_REP_REGION domain-containing protein (Fragment)
TCONS_00008895	318.934	-0.961772	0.294628	-3.26436	0.00109713	0.0114659	A0A0H5QH79	Uncharacterized protein (Fragment)
TCONS_00010770	46.7753	-1.33967	0.415931	-3.22088	0.00127796	0.0127613	A0A0H5QH79	Uncharacterized protein (Fragment)
TCONS_00013253	36.9808	-0.301818	0.45155	-0.668403	0.503876	0.666023	A0A0H5QH89	Uncharacterized protein
TCONS_00008368	59.7952	-0.132636	0.374402	-0.354261	0.723143	0.829784	A0A0H5QH94	Uncharacterized protein (Fragment)
TCONS_00015922	110.615	-0.963039	0.36593	-2.63176	0.00849449	0.0481821	A0A0H5QHA3	Uncharacterized protein
TCONS_00016782	122.484	-0.64152	0.313719	-2.04489	0.0408661	0.13108	A0A0H5QHA3	Uncharacterized protein
TCONS_00009341	213.562	0.605325	0.367188	1.64854	0.0992414	0.233991	A0A0H5QHA3	Uncharacterized protein
TCONS_00016735	172.362	-0.436463	0.311515	-1.4011	0.161185	0.32011	A0A0H5QHA3	Uncharacterized protein
TCONS_00001769	33.0879	0.0248017	0.405581	0.0611511	0.951239	0.973118	A0A0H5QHA4	Uncharacterized protein
TCONS_00008337	92.8088	0.117876	0.326634	0.360881	0.718188	0.825566	A0A0H5QHB0	Uncharacterized protein (Fragment)
TCONS_00016681	363.633	-0.617468	0.256594	-2.4064	0.0161106	0.0714057	A0A0H5QHB2	Uncharacterized protein (Fragment)
TCONS_00010462	49.7159	-0.918167	0.397509	-2.3098	0.0208991	0.0843149	A0A0H5QHB5	Uncharacterized protein
TCONS_00004048	28.0929	-1.24805	0.485627	-2.56997	0.0101708	0.0542206	A0A0H5QHB9	Uncharacterized protein
TCONS_00002154	343.084	-0.768639	0.354941	-2.16554	0.0303464	0.108027	A0A0H5QHC2	Uncharacterized protein (Fragment)
TCONS_00006824	169.151	-1.15011	0.299664	-3.83798	0.000124048	0.00265639	A0A0H5QHC6	Uncharacterized protein (Fragment)
TCONS_00009604	31.618	-0.462582	0.46196	-1.00135	0.31666	0.494175	A0A0H5QHE9	Uncharacterized protein (Fragment)
TCONS_00013352	138.722	-0.492519	0.328609	-1.4988	0.133926	0.284829	A0A0H5QHF1	Uncharacterized protein (Fragment)
TCONS_00002419	707.947	1.47524	0.467509	3.15554	0.00160201	0.0152241	A0A0H5QHF4	Uncharacterized protein
TCONS_00001564	110.968	0.328912	0.306383	1.07353	0.283032	0.460778	A0A0H5QHF9	Uncharacterized protein
TCONS_00000944	11.1457	1.9615	0.68906	2.84663	0.00441845	0.0310102	A0A0H5QHG4	Uncharacterized protein
TCONS_00016773	163.331	0.121079	0.322028	0.375989	0.706925	0.817656	A0A0H5QHG6	Uncharacterized protein
TCONS_00008252	258.104	-0.609899	0.275396	-2.21462	0.026786	0.0991835	A0A0H5QHH0	Uncharacterized protein (Fragment)
TCONS_00004474	40.7673	-0.567175	0.456951	-1.24122	0.214526	0.384698	A0A0H5QHH3	RNase III domain-containing protein (Fragment)
TCONS_00016318	12.3096	1.19033	0.694384	1.71422	0.0864886	0.213258	A0A0H5QHH6	Uncharacterized protein
TCONS_00012121	99.5034	-0.723676	0.335436	-2.15742	0.030973	0.109291	A0A0H5QHI2	Uncharacterized protein (Fragment)
TCONS_00011413	89.292	-0.668419	0.351208	-1.9032	0.0570143	0.163534	A0A0H5QHI7	RING-type domain-containing protein
TCONS_00008298	7.49702	1.45259	0.67488	2.15237	0.0313681	0.110177	A0A0H5QHJ3	Uncharacterized protein
TCONS_00013950	86.9799	0.383121	0.372333	1.02897	0.303492	0.481343	A0A0H5QHJ8	Uncharacterized protein
TCONS_00009932	233.992	-0.735242	0.312421	-2.35337	0.0186042	0.0778144	A0A0H5QHK1	Uncharacterized protein (Fragment)
TCONS_00009420	9.59229	-0.709645	0.633479	-1.12023	0.262614	0.436928	A0A0H5QHK3	PGA_cap domain-containing protein (Fragment)
TCONS_00001233	57.8681	-0.119395	0.422807	-0.282387	0.777647	0.864554	A0A0H5QHL2	Uncharacterized protein
TCONS_00006443	75.5091	0.0970802	0.38171	0.25433	0.799241	0.878349	A0A0H5QHL8	Uncharacterized protein
TCONS_00008605	11.9088	-0.0418153	0.644028	-0.0649277	0.948232	0.971325	A0A0H5QHM8	Uncharacterized protein
TCONS_00013741	15.7244	-1.0808	0.554585	-1.94884	0.051315	0.152214	A0A0H5QHN1	PFK domain-containing protein (Fragment)
TCONS_00009157	36.2159	-0.257665	0.456594	-0.564318	0.572537	0.721553	A0A0H5QHP4	Uncharacterized protein
TCONS_00005250	29.5627	1.42809	0.556879	2.56446	0.0103338	0.054713	A0A0H5QHP6	Kinesin motor domain-containing protein (Fragment)
TCONS_00011897	12.6073	-0.499851	0.561117	-0.890815	0.373029	0.547519	A0A0H5QHQ1	3'-5' exonuclease domain-containing protein (Fragment)
TCONS_00000155	170.275	1.21946	0.468928	2.60053	0.00930804	0.0513012	A0A0H5QHQ6	Uncharacterized protein
TCONS_00009708	28.203	1.32982	0.567696	2.34249	0.0191554	0.0794745	A0A0H5QHR1	Uncharacterized protein (Fragment)
TCONS_00010231	60.5506	0.686312	0.499776	1.37324	0.169678	0.330508	A0A0H5QHR3	ABC transporter domain-containing protein
TCONS_00007263	3.93382	0.466058	0.777061	0.59977	0.54866	0.701341	A0A0H5QHR7	Uncharacterized protein (Fragment)
TCONS_00004738	38.2515	0.897096	0.437434	2.05082	0.0402849	0.130042	A0A0H5QHR9	Uncharacterized protein (Fragment)
TCONS_00004736	9.91232	0.661694	0.647547	1.02185	0.306853	0.484905	A0A0H5QHR9	Uncharacterized protein (Fragment)
TCONS_00010720	10.8813	0.0682494	0.607457	0.112353	0.910544	0.949756	A0A0H5QHS2	RING-type domain-containing protein
TCONS_00010571	24.542	-0.158757	0.463674	-0.342389	0.732058	0.835234	A0A0H5QHS5	Mitochondrial 18 kDa protein (Mitochondrial fission process protein 1)
TCONS_00010561	64.1767	-0.553316	0.368887	-1.49996	0.133625	0.284526	A0A0H5QHT5	Uncharacterized protein (Fragment)
TCONS_00010106	3.86203	-2.52808	0.806314	-3.13535	0.00171649	0.0157827	A0A0H5QHU5	Uncharacterized protein
TCONS_00006573	47.5612	0.156986	0.379857	0.413275	0.679405	0.798625	A0A0H5QHU8	Kynureninase (EC 3.7.1.3) (L-kynurenine hydrolase)
TCONS_00006345	289.74	1.2648	0.33792	3.7429	0.000181906	0.00347029	A0A0H5QHV5	Uncharacterized protein
TCONS_00006977	25.3406	-0.38074	0.573762	-0.663585	0.506956	0.668427	A0A0H5QHV7	Uncharacterized protein
TCONS_00008651	3334.64	1.88369	0.514572	3.6607	0.00025153	0.0042477	A0A0H5QHV8	Tyrosinase_Cu-bd domain-containing protein (Fragment)
TCONS_00005852	22.3238	-0.435727	0.574889	-0.757933	0.448491	0.619086	A0A0H5QHW1	Uncharacterized protein (Fragment)
TCONS_00000855	169.866	-0.689274	0.301174	-2.28862	0.0221013	0.087332	A0A0H5QHW4	Uncharacterized protein (Fragment)
TCONS_00015776	64.5987	0.382722	0.399263	0.95857	0.337776	0.515045	A0A0H5QHW9	PDEase domain-containing protein (Fragment)
TCONS_00010010	94.4216	-1.0809	0.331342	-3.2622	0.00110552	0.0115222	A0A0H5QHX1	Uncharacterized protein (Fragment)
TCONS_00008637	61.8817	1.1622	0.57493	2.02145	0.0432327	0.136215	A0A0H5QHX9	WD_REPEATS_REGION domain-containing protein (Fragment)
TCONS_00016999	4.21429	1.58546	0.791005	2.00436	0.0450311	0.14015	A0A0H5QHY6	DDE-1 domain-containing protein
TCONS_00012979	13.0704	-0.819579	0.574338	-1.427	0.153581	0.310789	A0A0H5QHY6	DDE-1 domain-containing protein
TCONS_00016891	23.4282	-0.117421	0.47949	-0.244888	0.806543	0.883582	A0A0H5QHY6	DDE-1 domain-containing protein
TCONS_00013648	45.5289	0.0617093	0.422711	0.145984	0.883934	0.933621	A0A0H5QHY6	DDE-1 domain-containing protein
TCONS_00006023	13.2782	-0.0449619	0.639186	-0.0703424	0.943921	0.969175	A0A0H5QHY6	DDE-1 domain-containing protein
TCONS_00005511	50.7957	-0.203243	0.357635	-0.568298	0.569833	0.719343	A0A0H5QHY9	Uncharacterized protein
TCONS_00003791	7.14273	-0.1178	0.696075	-0.169235	0.865612	0.922532	A0A0H5QHZ1	Uncharacterized protein
TCONS_00006580	17.9015	-1.486	0.560241	-2.65243	0.00799148	0.0463494	A0A0H5QI04	Uncharacterized protein
TCONS_00000086	37.3933	0.759627	0.510408	1.48827	0.136678	0.288439	A0A0H5QI05	RING-type domain-containing protein
TCONS_00007082	11.4031	0.656067	0.614642	1.0674	0.285793	0.463988	A0A0H5QI08	Uncharacterized protein
TCONS_00010144	64.4333	-0.872178	0.458816	-1.90093	0.0573109	0.16396	A0A0H5QI09	Uncharacterized protein (Fragment)
TCONS_00004025	26.0657	0.121961	0.476772	0.255806	0.798101	0.877727	A0A0H5QI16	Uncharacterized protein
TCONS_00001500	58.0777	-0.440256	0.388475	-1.13329	0.257091	0.431483	A0A0H5QI38	Uncharacterized protein
TCONS_00013115	54.679	0.502972	0.422816	1.18957	0.234214	0.408058	A0A0H5QI41	Uncharacterized protein
TCONS_00000431	43.9937	0.500233	0.419484	1.1925	0.233067	0.406884	A0A0H5QI49	E2F_TDP domain-containing protein
TCONS_00015278	5.06325	-0.969278	0.735384	-1.31806	0.187484	0.353866	A0A0H5QI55	Uncharacterized protein
TCONS_00016378	110.957	1.11823	0.600058	1.86355	0.0623856	0.172534	A0A0H5QI57	Uncharacterized protein (Fragment)
TCONS_00003962	621.468	-0.664697	0.309731	-2.14605	0.0318693	0.111375	A0A0H5QI59	Uncharacterized protein (Fragment)
TCONS_00006049	23.789	-0.0631208	0.500925	-0.126008	0.899725	0.943509	A0A0H5QI69	Uncharacterized protein (Fragment)
TCONS_00003063	72.5803	0.771964	0.386339	1.99815	0.0457001	0.141198	A0A0H5QI97	Uncharacterized protein (Fragment)
TCONS_00007844	244.673	-0.601065	0.294873	-2.03839	0.0415113	0.132097	A0A0H5QIA4	ANK_REP_REGION domain-containing protein (Fragment)
TCONS_00012538	6.54396	1.52038	0.790408	1.92354	0.0544125	0.158092	A0A0H5QIA6	Uncharacterized protein
TCONS_00013210	24.7762	-0.432873	0.490693	-0.882165	0.377687	0.551605	A0A0H5QIA9	Uncharacterized protein
TCONS_00015106	114.73	-0.575254	0.329947	-1.74348	0.0812502	0.204529	A0A0H5QIC2	Uncharacterized protein
TCONS_00007189	83.6985	-0.195957	0.378834	-0.517265	0.604971	0.745014	A0A0H5QIC5	Uncharacterized protein
TCONS_00015883	25.2178	-0.827759	0.456437	-1.81352	0.0697511	0.185888	A0A0H5QIC6	Uncharacterized protein
TCONS_00016160	7.29743	-0.372427	0.674678	-0.552006	0.580944	0.725739	A0A0H5QIC6	Uncharacterized protein
TCONS_00011979	5.79117	0.336622	0.697759	0.482433	0.629499	0.763906	A0A0H5QIC6	Uncharacterized protein
TCONS_00005082	22.8587	-0.257734	0.524248	-0.491626	0.622984	0.759816	A0A0H5QID8	Uncharacterized protein (Fragment)
TCONS_00010977	37.1712	-0.466384	0.448079	-1.04085	0.297945	0.47604	A0A0H5QIE0	Uncharacterized protein
TCONS_00012855	117.077	1.99529	0.586936	3.3995	0.000675082	0.00824981	A0A0H5QIE4	Uncharacterized protein
TCONS_00016395	5.64511	0.0477407	0.769549	0.0620373	0.950533	0.972786	A0A0H5QIE4	Uncharacterized protein
TCONS_00011312	20.1031	0.796815	0.625755	1.27337	0.202888	0.371226	A0A0H5QIG0	Uncharacterized protein (Fragment)
TCONS_00008914	9.10615	1.93596	0.689194	2.80902	0.00496925	0.0335227	A0A0H5QIG6	Uncharacterized protein
TCONS_00007055	50.6723	0.336502	0.357347	0.941666	0.346364	0.524019	A0A0H5QIH9	Uncharacterized protein
TCONS_00007436	9.51883	0.284483	0.632045	0.4501	0.652638	0.779843	A0A0H5QII1	Uncharacterized protein (Fragment)
TCONS_00008759	20.3523	0.918396	0.536755	1.71101	0.0870785	0.214265	A0A0H5QII2	Uncharacterized protein (Fragment)
TCONS_00008760	18.4925	0.858764	0.592626	1.44908	0.147314	0.303026	A0A0H5QII2	Uncharacterized protein (Fragment)
TCONS_00008287	14.3125	-0.277427	0.621667	-0.446263	0.655408	0.781638	A0A0H5QII3	Uncharacterized protein
TCONS_00009390	26.8706	-0.274442	0.513122	-0.534848	0.592755	0.735081	A0A0H5QII9	CCT domain-containing protein
TCONS_00000035	14.7353	0.273871	0.65879	0.415719	0.677616	0.797624	A0A0H5QIJ0	Succinate dehydrogenase [ubiquinone] cytochrome b small subunit (Fragment)
TCONS_00007853	39.6723	-0.273271	0.421847	-0.647797	0.517117	0.676723	A0A0H5QIJ2	Uncharacterized protein
TCONS_00007309	13.8963	-0.453272	0.615258	-0.736719	0.461293	0.630047	A0A0H5QIJ3	Uncharacterized protein
TCONS_00009146	154.076	0.808328	0.380846	2.12245	0.0337998	0.115779	A0A0H5QIJ6	Uncharacterized protein (Fragment)
TCONS_00008592	33.511	0.416908	0.471908	0.883452	0.376992	0.551221	A0A0H5QIK7	UDENN domain-containing protein
TCONS_00005040	74.1923	0.950817	0.51639	1.84128	0.065581	0.178539	A0A0H5QIL9	Uncharacterized protein (Fragment)
TCONS_00015326	13.0448	0.404195	0.564039	0.716609	0.473615	0.640926	A0A0H5QIM7	ANK_REP_REGION domain-containing protein (Fragment)
TCONS_00014583	15.6945	-0.432775	0.550582	-0.786031	0.431849	0.603263	A0A0H5QIN3	Uncharacterized protein (Fragment)
TCONS_00016623	152.819	-0.438359	0.326713	-1.34173	0.179685	0.34361	A0A0H5QIN4	ANK_REP_REGION domain-containing protein (Fragment)
TCONS_00008520	6.58652	0.94175	0.763171	1.234	0.217205	0.386782	A0A0H5QIP0	Aminoacyl-tRNA hydrolase (EC 3.1.1.29)
TCONS_00001032	92.8605	0.419622	0.443659	0.945821	0.34424	0.522092	A0A0H5QIP8	Uncharacterized protein
TCONS_00011789	108.793	0.149861	0.349816	0.4284	0.66836	0.792337	A0A0H5QIQ7	RGS domain-containing protein
TCONS_00002239	132.487	1.50941	0.55084	2.7402	0.00614014	0.0385017	A0A0H5QIQ8	Rho-GAP domain-containing protein (Fragment)
TCONS_00005364	72.6733	-0.619731	0.357396	-1.73402	0.0829148	0.207052	A0A0H5QIR2	Uncharacterized protein
TCONS_00005744	13.5079	0.108337	0.60599	0.178777	0.858113	0.917222	A0A0H5QIR8	Uncharacterized protein (Fragment)
TCONS_00011640	56.2176	-0.643572	0.448597	-1.43463	0.151392	0.308428	A0A0H5QIR9	Uncharacterized protein
TCONS_00009263	72.4047	-1.20106	0.38227	-3.1419	0.00167856	0.0156549	A0A0H5QIS0	Coiled-coil domain-containing protein 86 (Fragment)
TCONS_00004205	125.662	-0.172141	0.402979	-0.427171	0.669255	0.792661	A0A0H5QIS4	RF_PROK_I domain-containing protein (Fragment)
TCONS_00004219	19.5339	0.13605	0.493662	0.275592	0.782861	0.867075	A0A0H5QIS4	RF_PROK_I domain-containing protein (Fragment)
TCONS_00007608	40.9545	1.10972	0.429335	2.58474	0.00974539	0.0527581	A0A0H5QIS5	Uncharacterized protein (Fragment)
TCONS_00007610	7.69098	0.991278	0.732922	1.3525	0.176215	0.339216	A0A0H5QIS5	Uncharacterized protein (Fragment)
TCONS_00007609	27.0002	0.524102	0.522294	1.00346	0.315638	0.49325	A0A0H5QIS5	Uncharacterized protein (Fragment)
TCONS_00009707	65.6808	0.517098	0.346007	1.49448	0.135051	0.286507	A0A0H5QIT3	Uncharacterized protein (Fragment)
TCONS_00001468	14.7318	1.83126	0.670416	2.73153	0.00630411	0.0392649	A0A0H5QIT4	Calponin-homology (CH) domain-containing protein
TCONS_00001466	6.46221	1.3755	0.699369	1.96678	0.0492092	0.148092	A0A0H5QIT4	Calponin-homology (CH) domain-containing protein
TCONS_00001467	4.91747	0.777168	0.802729	0.968157	0.332966	0.510766	A0A0H5QIT4	Calponin-homology (CH) domain-containing protein
TCONS_00012229	8.57965	1.57821	0.652654	2.41815	0.0155997	0.0701987	A0A0H5QIT9	Glyco_18 domain-containing protein (Fragment)
TCONS_00002582	5.82304	-0.42625	0.681133	-0.625795	0.531449	0.687652	A0A0H5QIU7	Uncharacterized protein
TCONS_00002563	12.1901	-0.0855849	0.605008	-0.141461	0.887506	0.936084	A0A0H5QIU7	Uncharacterized protein
TCONS_00012342	66.4663	-0.134295	0.381503	-0.352015	0.724827	0.830576	A0A0H5QIU9	Uncharacterized protein (Fragment)
TCONS_00010992	193.081	1.23686	0.566446	2.18355	0.0289952	0.105025	A0A0H5QIV4	Uncharacterized protein (Fragment)
TCONS_00011188	70.2646	2.48125	0.404603	6.13255	8.64821e-10	1.14782e-06	A0A0H5QIW1	Uncharacterized protein
TCONS_00013206	31.9919	0.0195042	0.410538	0.0475089	0.962108	0.979261	A0A0H5QIX1	Uncharacterized protein
TCONS_00003165	4.93394	0.186514	0.765385	0.243686	0.807474	0.884222	A0A0H5QIY4	Uncharacterized protein
TCONS_00000347	96.0751	1.19872	0.340501	3.52047	0.000430775	0.00608013	A0A0H5QIY8	Uncharacterized protein (Fragment)
TCONS_00003464	24.1737	-0.176081	0.503975	-0.349384	0.726801	0.831469	A0A0H5QIZ0	Uncharacterized protein (Fragment)
TCONS_00008968	13.8157	-1.94867	0.649379	-3.00083	0.00269245	0.0216813	A0A0H5QIZ6	Uncharacterized protein
TCONS_00005864	171.967	0.507422	0.288526	1.75867	0.0786336	0.200783	A0A0H5QIZ8	Chromo domain-containing protein
TCONS_00013681	12.7674	1.00768	0.601131	1.67631	0.0936777	0.22465	A0A0H5QIZ8	Chromo domain-containing protein
TCONS_00014007	3.8163	-0.362814	0.753584	-0.481451	0.630196	0.764269	A0A0H5QIZ8	Chromo domain-containing protein
TCONS_00013678	29.474	1.41811	0.575896	2.46244	0.0137995	0.065478	A0A0H5QJ01	Uncharacterized protein (Fragment)
TCONS_00012897	51.7161	0.592161	0.421264	1.40568	0.15982	0.318805	A0A0H5QJ01	Uncharacterized protein (Fragment)
TCONS_00014319	91.8732	1.40152	0.329243	4.25678	2.07394e-05	0.000908926	A0A0H5QJ05	Uncharacterized protein
TCONS_00007504	27.8201	-0.978596	0.446148	-2.19343	0.0282762	0.103006	A0A0H5QJ07	Uncharacterized protein
TCONS_00013088	42.4295	-0.469055	0.424118	-1.10595	0.268747	0.444565	A0A0H5QJ21	Uncharacterized protein
TCONS_00008496	9.86797	1.82563	0.676602	2.69823	0.00697098	0.0421899	A0A0H5QJ25	Uncharacterized protein (Fragment)
TCONS_00008495	12.4255	-0.0401995	0.580091	-0.0692985	0.944752	0.969452	A0A0H5QJ25	Uncharacterized protein (Fragment)
TCONS_00000663	11.4813	-1.30818	0.651131	-2.00909	0.0445274	0.139035	A0A0H5QJ28	Uncharacterized protein (Fragment)
TCONS_00009091	19.1155	-0.700081	0.524308	-1.33525	0.181795	0.346839	A0A0H5QJ33	Uncharacterized protein (Fragment)
TCONS_00014755	5.70948	0.586298	0.721157	0.812996	0.41622	0.588773	A0A0H5QJ33	Uncharacterized protein (Fragment)
TCONS_00007226	79.7666	0.043229	0.322846	0.1339	0.893482	0.939538	A0A0H5QJ38	Uncharacterized protein
TCONS_00011748	82.1487	-0.820335	0.355788	-2.30569	0.0211282	0.0850689	A0A0H5QJ40	Uncharacterized protein
TCONS_00009809	20.4819	-0.285185	0.585254	-0.487284	0.626057	0.762026	A0A0H5QJ41	Complex I-ESSS (NADH dehydrogenase [ubiquinone] 1 beta subcomplex subunit 11, mitochondrial) (NADH-ubiquinone oxidoreductase ESSS subunit) (Fragment)
TCONS_00007400	15.7705	1.87557	0.66789	2.80821	0.0049818	0.0335778	A0A0H5QJ46	Uncharacterized protein (Fragment)
TCONS_00012508	45.8395	0.228273	0.442282	0.516125	0.605767	0.745875	A0A0H5QJ52	Protein kinase domain-containing protein
TCONS_00007060	4.95269	0.626326	0.730373	0.857543	0.391145	0.562666	A0A0H5QJ61	Uncharacterized protein
TCONS_00010759	127.181	1.3049	0.332785	3.92115	8.81264e-05	0.00216079	A0A0H5QJ67	Uncharacterized protein
TCONS_00005421	24.2217	-0.823781	0.52666	-1.56416	0.11778	0.262038	A0A0H5QJ72	MitMem_reg domain-containing protein
TCONS_00008900	282.942	0.50999	0.375802	1.35707	0.174759	0.337177	A0A0H5QJ75	Uncharacterized protein (Fragment)
TCONS_00006599	147.16	-0.40776	0.303804	-1.34218	0.179537	0.343451	A0A0H5QJ84	Uncharacterized protein (Fragment)
TCONS_00009252	116.381	1.49598	0.488777	3.06065	0.00220857	0.0187542	A0A0H5QJ96	Uncharacterized protein
TCONS_00004785	7.54993	2.12983	0.719105	2.96178	0.0030587	0.0237402	A0A0H5QJ98	Uncharacterized protein
TCONS_00013074	29.2915	-0.814367	0.443798	-1.835	0.0665061	0.179778	A0A0H5QJB0	Uncharacterized protein
TCONS_00007859	103.928	-0.430399	0.345353	-1.24626	0.212669	0.382475	A0A0H5QJB2	SAM domain-containing protein
TCONS_00008514	5.09603	1.29864	0.743727	1.74612	0.08079	0.203947	A0A0H5QJB8	Acyl_transf_3 domain-containing protein (Fragment)
TCONS_00009095	86.1902	0.520299	0.344047	1.51229	0.13046	0.279714	A0A0H5QJC4	Uncharacterized protein
TCONS_00009096	8.40804	0.361678	0.654746	0.552394	0.580679	0.72573	A0A0H5QJC4	Uncharacterized protein
TCONS_00001618	1530.23	1.9356	0.504575	3.83609	0.000125007	0.00265639	A0A0H5QJC8	Uncharacterized protein
TCONS_00001652	70.2215	0.106947	0.359375	0.297591	0.766015	0.856364	A0A0H5QJC8	Uncharacterized protein
TCONS_00012669	72.0079	-0.712344	0.33882	-2.10243	0.0355159	0.119716	A0A0H5QJD0	Uncharacterized protein
TCONS_00001244	98.0332	-1.17198	0.340792	-3.43899	0.00058389	0.00751979	A0A0H5QJD1	Uncharacterized protein
TCONS_00015549	284.652	2.56906	0.533516	4.81534	1.46949e-06	0.000185503	A0A0H5QJE1	Uncharacterized protein (Fragment)
TCONS_00015552	129.447	1.93187	0.550724	3.50787	0.000451716	0.00627156	A0A0H5QJE1	Uncharacterized protein (Fragment)
TCONS_00015711	5.28597	-0.227657	0.735552	-0.309504	0.756938	0.850929	A0A0H5QJE1	Uncharacterized protein (Fragment)
TCONS_00015480	28.4284	1.08665	0.559165	1.94335	0.0519743	0.153515	A0A0H5QJF5	Uncharacterized protein (Fragment)
TCONS_00014357	27.3134	1.95087	0.537816	3.62739	0.000286296	0.00457237	A0A0H5QJF6	Uncharacterized protein (Fragment)
TCONS_00013310	295.179	1.26406	0.512348	2.46719	0.0136179	0.0647865	A0A0H5QJF8	Uncharacterized protein (Fragment)
TCONS_00016618	18.3815	-1.17701	0.506378	-2.32436	0.020106	0.0819889	A0A0H5QJG8	Uncharacterized protein
TCONS_00009298	19.4605	2.74232	0.685744	3.99905	6.3598e-05	0.00176277	A0A0H5QJH0	Uncharacterized protein (Fragment)
TCONS_00002791	113.568	1.02291	0.383124	2.66992	0.00758694	0.0447114	A0A0H5QJH7	Uncharacterized protein (Fragment)
TCONS_00014647	292.608	-1.1334	0.296184	-3.82667	0.000129889	0.00272232	A0A0H5QJI1	Uncharacterized protein
TCONS_00006726	12.678	0.635322	0.582837	1.09005	0.275691	0.452493	A0A0H5QJI4	UDENN domain-containing protein (Fragment)
TCONS_00012280	7.45565	0.0173302	0.71131	0.0243638	0.980562	0.989748	A0A0H5QJK0	Uncharacterized protein (Fragment)
TCONS_00006707	70.5849	-0.361062	0.327626	-1.10206	0.270437	0.445872	A0A0H5QJK3	Uncharacterized protein (Fragment)
TCONS_00003390	60.1144	1.94683	0.488242	3.98744	6.67905e-05	0.00180601	A0A0H5QJK5	Aminotran_1_2 domain-containing protein (Fragment)
TCONS_00012898	12212.6	2.04241	0.525801	3.88438	0.000102593	0.00234981	A0A0H5QJM7	Uncharacterized protein (Fragment)
TCONS_00009445	19.7634	-0.682128	0.547118	-1.24677	0.212483	0.382475	A0A0H5QJN2	TPR_REGION domain-containing protein (Fragment)
TCONS_00012571	78.8371	1.3975	0.424121	3.29504	0.000984063	0.0106467	A0A0H5QJN3	Uncharacterized protein (Fragment)
TCONS_00010300	143.908	1.55747	0.386812	4.02644	5.66286e-05	0.0016286	A0A0H5QJN5	Uncharacterized protein (Fragment)
TCONS_00008182	14.2463	0.796773	0.56688	1.40554	0.159861	0.318805	A0A0H5QJN9	Uncharacterized protein
TCONS_00006348	38.7027	-0.0411666	0.453216	-0.0908324	0.927626	0.959872	A0A0H5QJP0	UPF0029 domain-containing protein
TCONS_00004661	45.8534	-0.9819	0.444426	-2.20936	0.0271493	0.100189	A0A0H5QJQ2	Uncharacterized protein (Fragment)
TCONS_00015557	127.374	-0.650784	0.315415	-2.06327	0.0390873	0.127133	A0A0H5QJQ5	Uncharacterized protein
TCONS_00011700	10.3007	0.418323	0.682804	0.612654	0.540105	0.694304	A0A0H5QJQ7	t-SNARE coiled-coil homology domain-containing protein
TCONS_00013502	4.59482	-0.455639	0.758076	-0.601046	0.547809	0.700793	A0A0H5QJR1	Uncharacterized protein (Fragment)
TCONS_00016232	103.728	-0.261344	0.332548	-0.785885	0.431935	0.603263	A0A0H5QJR2	Myb_DNA-bind_3 domain-containing protein
TCONS_00010429	12.5578	0.595227	0.592049	1.00537	0.31472	0.492655	A0A0H5QJT8	Pyr_redox_2 domain-containing protein (Fragment)
TCONS_00010407	92.6583	0.604273	0.399521	1.51249	0.130408	0.279682	A0A0H5QJU3	Uncharacterized protein
TCONS_00006004	6.80475	0.891157	0.780008	1.1425	0.253247	0.428579	A0A0H5QJV0	Uncharacterized protein (Fragment)
TCONS_00004642	88.0565	1.11644	0.464562	2.40322	0.0162515	0.0715559	A0A0H5QJV2	Uncharacterized protein (Fragment)
TCONS_00013693	5.23264	0.873226	0.730776	1.19493	0.232114	0.405537	A0A0H5QJV6	Uncharacterized protein (Fragment)
TCONS_00011471	48.8979	0.570098	0.392604	1.4521	0.146475	0.302391	A0A0H5QJV7	HPt domain-containing protein
TCONS_00014805	7.48664	0.258137	0.678697	0.380342	0.703691	0.815091	A0A0H5QJW0	Uncharacterized protein (Fragment)
TCONS_00008077	15.7572	-0.110215	0.588121	-0.187402	0.851346	0.912682	A0A0H5QJW1	Uncharacterized protein (Fragment)
TCONS_00003106	4.70913	1.19665	0.760084	1.57436	0.115404	0.258519	A0A0H5QJW3	Uncharacterized protein (Fragment)
TCONS_00008539	6.88182	0.0530147	0.677387	0.0782635	0.937618	0.965771	A0A0H5QJW5	Uncharacterized protein
TCONS_00013021	11.2118	-0.371816	0.566253	-0.656625	0.511422	0.67223	A0A0H5QJW7	Uncharacterized protein (Fragment)
TCONS_00000700	4.47579	-0.160619	0.807479	-0.198915	0.842329	0.907197	A0A0H5QJX1	Rho-GAP domain-containing protein
TCONS_00013979	14.0391	-0.480982	0.532044	-0.904028	0.365981	0.541891	A0A0H5QJX5	Uncharacterized protein
TCONS_00005251	135.864	0.126822	0.341337	0.371544	0.710232	0.820117	A0A0H5QJX8	Uncharacterized protein
TCONS_00006743	4.26012	0.362418	0.791662	0.457793	0.647101	0.775967	A0A0H5QJZ9	Uncharacterized protein (Fragment)
TCONS_00013690	103.738	-0.370655	0.344321	-1.07648	0.281713	0.459119	A0A0H5QK01	Uncharacterized protein
TCONS_00013676	25.3392	1.84615	0.472895	3.90393	9.46444e-05	0.00228401	A0A0H5QK09	Retrotrans_gag domain-containing protein (Fragment)
TCONS_00014620	196.813	0.00841982	0.323393	0.0260359	0.979229	0.989055	A0A0H5QK10	Uncharacterized protein
TCONS_00007758	233.455	1.11597	0.459441	2.42898	0.0151413	0.0689049	A0A0H5QK11	Uncharacterized protein (Fragment)
TCONS_00013192	77.8854	1.64712	0.462764	3.5593	0.000371839	0.00544937	A0A0H5QK38	RGS domain-containing protein (Fragment)
TCONS_00012988	35.5472	1.09292	0.522652	2.09111	0.0365179	0.122095	A0A0H5QK38	RGS domain-containing protein (Fragment)
TCONS_00002684	5.90232	0.273864	0.798397	0.343017	0.731586	0.834952	A0A0H5QK49	Uncharacterized protein (Fragment)
TCONS_00008197	8.17544	0.667788	0.630114	1.05979	0.289241	0.467341	A0A0H5QK62	Uncharacterized protein
TCONS_00006377	9.58809	-0.335074	0.616521	-0.543492	0.586791	0.731219	A0A0H5QK69	Uncharacterized protein (Fragment)
TCONS_00008081	24.2007	0.16761	0.462183	0.362648	0.716868	0.824649	A0A0H5QK73	Uncharacterized protein
TCONS_00009242	67.7178	0.780552	0.51427	1.51779	0.129068	0.277741	A0A0H5QK74	Uncharacterized protein
TCONS_00013069	122.79	0.921052	0.367792	2.50428	0.0122702	0.0605203	A0A0H5QK81	Uncharacterized protein
TCONS_00010258	311.021	1.03137	0.441883	2.33404	0.0195934	0.0806724	A0A0H5QK82	Uncharacterized protein (Fragment)
TCONS_00009669	84.2928	-0.401837	0.340784	-1.17916	0.238336	0.411593	A0A0H5QK85	Uncharacterized protein (Fragment)
TCONS_00016862	5.78245	0.0412678	0.754932	0.0546642	0.956406	0.975162	A0A0H5QK91	Uncharacterized protein
TCONS_00010843	2050.43	1.91284	0.468204	4.08549	4.39835e-05	0.0014162	A0A0H5QK92	Uncharacterized protein (Fragment)
TCONS_00011766	8.62303	-0.224594	0.655846	-0.34245	0.732012	0.835234	A0A0H5QK93	Uncharacterized protein (Fragment)
TCONS_00008515	16.036	0.966871	0.568906	1.69953	0.0892202	0.217645	A0A0H5QK94	Uncharacterized protein
TCONS_00008516	30.5921	0.788849	0.527628	1.49509	0.134892	0.286461	A0A0H5QK94	Uncharacterized protein
TCONS_00002360	32.5029	-0.964979	0.474439	-2.03393	0.0419582	0.133242	A0A0H5QKA2	Uncharacterized protein (Fragment)
TCONS_00008239	147.839	1.55879	0.604594	2.57825	0.00993026	0.0534223	A0A0H5QKA3	Uncharacterized protein (Fragment)
TCONS_00007378	13.5074	2.00305	0.577853	3.46637	0.000527534	0.00694602	A0A0H5QKA4	Uncharacterized protein (Fragment)
TCONS_00016698	4.20039	-1.01794	0.766656	-1.32777	0.184255	0.350111	A0A0H5QKA9	Uncharacterized protein
TCONS_00015969	90.1533	1.16081	0.42256	2.74708	0.00601283	0.037921	A0A0H5QKB0	Uncharacterized protein (Fragment)
TCONS_00010005	5.50739	0.771758	0.784664	0.983553	0.325335	0.503125	A0A0H5QKB2	Uncharacterized protein (Fragment)
TCONS_00010723	7357.1	1.92464	0.517087	3.72207	0.000197594	0.00358197	A0A0H5QKB5	Uncharacterized protein (Fragment)
TCONS_00013604	139.213	1.54149	0.38328	4.02184	5.77447e-05	0.00164831	A0A0H5QKD3	Uncharacterized protein (Fragment)
TCONS_00012926	7.99502	0.068322	0.694266	0.098409	0.921607	0.955973	A0A0H5QKD4	Uncharacterized protein (Fragment)
TCONS_00000770	167.585	0.307667	0.353608	0.87008	0.384257	0.557172	A0A0H5QKE0	Uncharacterized protein
TCONS_00006142	5.04707	0.445723	0.763149	0.584057	0.559182	0.711179	A0A0H5QKE2	Uncharacterized protein (Fragment)
TCONS_00001281	59.2417	-0.554675	0.359738	-1.54189	0.123101	0.269526	A0A0H5QKF8	Uncharacterized protein
TCONS_00005996	20.4106	-0.0421454	0.583212	-0.0722642	0.942392	0.968211	A0A0H5QKG2	Uncharacterized protein (Fragment)
TCONS_00002217	16.9893	0.747392	0.609984	1.22527	0.220475	0.390424	A0A0H5QKG4	Uncharacterized protein
TCONS_00015853	5.94785	0.513457	0.711374	0.721782	0.470429	0.637705	A0A0H5QKG8	Uncharacterized protein (Fragment)
TCONS_00015677	438.1	1.00201	0.38905	2.57553	0.0100086	0.0536551	A0A0H5QKH9	Uncharacterized protein (Fragment)
TCONS_00000551	5.54459	1.45747	0.755597	1.9289	0.0537427	0.15692	A0A0H5QKH9	Uncharacterized protein (Fragment)
TCONS_00012790	6.98995	-0.0248245	0.650692	-0.038151	0.969567	0.983451	A0A0H5QKI1	Chromo domain-containing protein (Fragment)
TCONS_00016825	25.4868	-0.878064	0.563393	-1.55853	0.119108	0.263803	A0A0H5QKI6	Uncharacterized protein (Fragment)
TCONS_00006906	68.8157	0.648654	0.354303	1.83079	0.0671318	0.180952	A0A0H5QKJ3	Rhomboid domain-containing protein (Fragment)
TCONS_00011106	8.18142	-0.935638	0.667411	-1.40189	0.160948	0.319895	A0A0H5QKK3	Cyclin N-terminal domain-containing protein
TCONS_00016815	14.9786	-0.879712	0.570664	-1.54156	0.123181	0.269624	A0A0H5QKK6	Uncharacterized protein (Fragment)
TCONS_00014355	11.6026	0.813562	0.618027	1.31638	0.188045	0.354305	A0A0H5QKN3	Uncharacterized protein
TCONS_00014356	5.34224	0.145071	0.705856	0.205525	0.837162	0.903988	A0A0H5QKN3	Uncharacterized protein
TCONS_00008361	65.13	1.93163	0.483932	3.99154	6.56469e-05	0.00179357	A0A0H5QKP1	Uncharacterized protein (Fragment)
TCONS_00009314	71.6447	1.23525	0.425028	2.90627	0.00365761	0.0270345	A0A0H5QKP1	Uncharacterized protein (Fragment)
TCONS_00011738	6.28751	-1.58877	0.720821	-2.2041	0.027517	0.10135	A0A0H5QKP1	Uncharacterized protein (Fragment)
TCONS_00001009	11.9001	0.437706	0.649376	0.674041	0.500285	0.66329	A0A0H5QKP1	Uncharacterized protein (Fragment)
TCONS_00008911	239.778	1.85396	0.44153	4.19895	2.68152e-05	0.00105587	A0A0H5QKQ4	Uncharacterized protein
TCONS_00006396	175.535	0.760529	0.381822	1.99184	0.0463887	0.142577	A0A0H5QKQ5	Uncharacterized protein (Fragment)
TCONS_00011975	182.431	-0.609873	0.33364	-1.82794	0.0675593	0.181726	A0A0H5QKR0	PA28_beta domain-containing protein (Fragment)
TCONS_00006810	3365.07	1.80912	0.554079	3.26509	0.00109428	0.0114518	A0A0H5QKR3	Uncharacterized protein (Fragment)
TCONS_00013128	27.5706	-0.435985	0.568149	-0.767378	0.442857	0.614192	A0A0H5QKS1	Uncharacterized protein (Fragment)
TCONS_00013766	68.592	1.53985	0.525475	2.93039	0.0033854	0.0254654	A0A0H5QKS6	Pept_C1 domain-containing protein
TCONS_00008530	319.767	0.00332926	0.346893	0.00959735	0.992343	0.996726	A0A0H5QKS8	Uncharacterized protein
TCONS_00009217	8.87591	1.39443	0.71924	1.93875	0.052532	0.154688	A0A0H5QKT9	Uncharacterized protein
TCONS_00012958	4297.47	2.0334	0.530562	3.83254	0.000126827	0.00268018	A0A0H5QKU0	Uncharacterized protein (Fragment)
TCONS_00011105	15.8619	0.717556	0.516941	1.38808	0.165113	0.325377	A0A0H5QKU6	Uncharacterized protein (Fragment)
TCONS_00016385	21.0929	-0.741618	0.543218	-1.36523	0.17218	0.33397	A0A0H5QKU6	Uncharacterized protein (Fragment)
TCONS_00012937	290.859	-1.05744	0.330704	-3.19755	0.00138599	0.0136109	A0A0H5QKU7	DUF2428 domain-containing protein (Fragment)
TCONS_00009511	7.44166	0.928234	0.78091	1.18866	0.234575	0.40823	A0A0H5QKV5	Uncharacterized protein
TCONS_00003150	5710.78	2.06101	0.493256	4.17838	2.93587e-05	0.00109374	A0A0H5QKV6	Uncharacterized protein (Fragment)
TCONS_00012957	8.8234	0.206377	0.68519	0.301196	0.763265	0.854651	A0A0H5QKW7	Uncharacterized protein
TCONS_00012536	20.525	-0.994025	0.519297	-1.91417	0.055598	0.160543	A0A0H5QKX6	MTS domain-containing protein (Fragment)
TCONS_00008074	94.7076	0.593677	0.505297	1.17491	0.240031	0.413288	A0A0H5QKX8	Uncharacterized protein (Fragment)
TCONS_00010511	33.9534	1.21722	0.568241	2.14209	0.032186	0.11197	A0A0H5QKY1	Uncharacterized protein (Fragment)
TCONS_00013406	316.055	1.20207	0.442673	2.71548	0.00661791	0.0405735	A0A0H5QKY8	Uncharacterized protein (Fragment)
TCONS_00012791	36.5094	-0.241072	0.417475	-0.577452	0.563634	0.714111	A0A0H5QL00	Uncharacterized protein (Fragment)
TCONS_00011194	7.98082	-0.989582	0.691693	-1.43067	0.152525	0.309612	A0A0H5QL03	Uncharacterized protein
TCONS_00003290	7.81072	-0.285885	0.660331	-0.432942	0.665057	0.789278	A0A0H5QL09	Uncharacterized protein (Fragment)
TCONS_00007747	20.0767	-0.913987	0.547074	-1.67068	0.0947844	0.226736	A0A0H5QL30	SAP domain-containing protein (Fragment)
TCONS_00009691	103.02	-0.257807	0.34448	-0.748395	0.454222	0.623841	A0A0H5QL30	SAP domain-containing protein (Fragment)
TCONS_00003371	417.72	1.61335	0.415275	3.88502	0.000102323	0.00234981	A0A0H5QL34	Uncharacterized protein
TCONS_00005091	39.4032	-0.689843	0.419547	-1.64426	0.100123	0.235383	A0A0H5QL41	Uncharacterized protein (Fragment)
TCONS_00011733	28.3228	-0.16251	0.480569	-0.338161	0.735242	0.837617	A0A0H5QL43	Uncharacterized protein
TCONS_00013169	110.608	-0.395622	0.408129	-0.969356	0.332368	0.509951	A0A0H5QL49	Uncharacterized protein (Fragment)
TCONS_00010164	9.39232	0.881726	0.652359	1.3516	0.176505	0.339517	A0A0H5QL51	Uncharacterized protein (Fragment)
TCONS_00002474	5.19659	0.328155	0.77841	0.42157	0.673339	0.794886	A0A0H5QL60	Uncharacterized protein
TCONS_00016072	20.4524	-0.952003	0.488584	-1.94849	0.051356	0.152217	A0A0H5QL62	Uncharacterized protein (Fragment)
TCONS_00001952	26.2644	0.999026	0.456063	2.19055	0.0284847	0.103618	A0A0H5QL69	Uncharacterized protein
TCONS_00006694	23.8483	0.391295	0.525302	0.744896	0.456335	0.625323	A0A0H5QL71	Uncharacterized protein (Fragment)
TCONS_00007096	31.8826	0.721719	0.534834	1.34943	0.1772	0.340427	A0A0H5QL72	DH domain-containing protein (Fragment)
TCONS_00007097	26.8261	0.300528	0.620956	0.483976	0.628403	0.763335	A0A0H5QL72	DH domain-containing protein (Fragment)
TCONS_00014372	4.1778	-1.11752	0.797237	-1.40174	0.160993	0.319895	A0A0H5QL79	Uncharacterized protein (Fragment)
TCONS_00008973	11.7806	0.774323	0.616885	1.25521	0.209401	0.378972	A0A0H5QL95	Uncharacterized protein (Fragment)
TCONS_00013107	8.47155	0.42708	0.628637	0.679374	0.496901	0.66106	A0A0H5QL96	Uncharacterized protein
TCONS_00005451	148.979	-1.09731	0.333379	-3.29148	0.000996625	0.010736	A0A0H5QLA2	Uncharacterized protein (Fragment)
TCONS_00014597	12.0109	-0.370291	0.625699	-0.591804	0.553982	0.705857	A0A0H5QLB0	Uncharacterized protein
TCONS_00006022	8.87021	1.93941	0.667005	2.90764	0.00364168	0.026995	A0A0H5QLB1	Uncharacterized protein (Fragment)
TCONS_00015063	23.474	-0.764491	0.457445	-1.67122	0.0946781	0.226552	A0A0H5QLB1	Uncharacterized protein (Fragment)
TCONS_00015389	30.646	-0.0470158	0.475636	-0.0988482	0.921259	0.95574	A0A0H5QLB1	Uncharacterized protein (Fragment)
TCONS_00008741	17.3761	-0.118559	0.531085	-0.22324	0.823349	0.895962	A0A0H5QLB8	Uncharacterized protein (Fragment)
TCONS_00015392	31.6328	0.223073	0.481958	0.462847	0.643474	0.773832	A0A0H5QLC6	Uncharacterized protein
TCONS_00010595	62.3147	-0.422814	0.408425	-1.03523	0.300561	0.478963	A0A0H5QLC9	DNA polymerase alpha subunit B
TCONS_00007392	474.555	1.02564	0.390781	2.62458	0.0086755	0.0487638	A0A0H5QLD9	S4 RNA-binding domain-containing protein
TCONS_00012952	4.39976	-2.22412	0.781874	-2.84461	0.00444663	0.0311223	A0A0H5QLF6	Uncharacterized protein
TCONS_00012951	16.1188	-0.392834	0.512384	-0.766678	0.443273	0.614318	A0A0H5QLF6	Uncharacterized protein
TCONS_00002557	6.66885	0.323335	0.682405	0.473816	0.635631	0.767089	A0A0H5QLF6	Uncharacterized protein
TCONS_00010716	5293.6	1.88383	0.527515	3.57113	0.000355444	0.00531083	A0A0H5QLF9	Uncharacterized protein (Fragment)
TCONS_00006496	10.5219	0.12951	0.629451	0.20575	0.836986	0.903988	A0A0H5QLG4	Uncharacterized protein
TCONS_00001835	6.8628	-0.0868074	0.657796	-0.131967	0.89501	0.940708	A0A0H5QLG6	DNA_MISMATCH_REPAIR_2 domain-containing protein
TCONS_00004206	14.1785	-0.71897	0.567543	-1.26681	0.205223	0.374155	A0A0H5QLG7	Uncharacterized protein
TCONS_00011581	59.7849	1.66369	0.508791	3.26988	0.00107591	0.0113215	A0A0H5QLH2	Uncharacterized protein
TCONS_00016677	5781.61	-0.883853	0.244511	-3.61477	0.000300611	0.00472212	A0A0H5QLH5	Uncharacterized protein
TCONS_00014833	2575.45	1.91483	0.529849	3.61391	0.00030161	0.0047281	A0A0H5QLI2	Uncharacterized protein (Fragment)
TCONS_00015197	26.5102	-0.0675779	0.431513	-0.156607	0.875555	0.9286	A0A0H5QLI5	DUF676 domain-containing protein
TCONS_00009197	11.9387	-0.670252	0.558847	-1.19935	0.230393	0.403319	A0A0H5QLI8	Uncharacterized protein (Fragment)
TCONS_00008561	20.1346	0.105692	0.489375	0.215974	0.829008	0.898393	A0A0H5QLJ6	Uncharacterized protein (Fragment)
TCONS_00007651	27.7396	-0.959771	0.449463	-2.13537	0.0327307	0.113436	A0A0H5QLJ9	N-alpha-acetyltransferase 40 (EC 2.3.1.257)
TCONS_00014002	217.023	2.41434	0.425396	5.67552	1.3827e-08	6.61102e-06	A0A0H5QLK4	Uncharacterized protein (Fragment)
TCONS_00009171	37.1356	-0.809357	0.440244	-1.83843	0.0659993	0.179047	A0A0H5QLK9	Uncharacterized protein (Fragment)
TCONS_00014506	6.76576	-0.547666	0.673306	-0.813399	0.41599	0.588556	A0A0H5QLK9	Uncharacterized protein (Fragment)
TCONS_00013827	62.1701	-0.225129	0.388591	-0.579346	0.562355	0.713631	A0A0H5QLN8	Uncharacterized protein
TCONS_00013826	68.7176	0.0453678	0.368466	0.123126	0.902007	0.944255	A0A0H5QLN8	Uncharacterized protein
TCONS_00013675	116.173	-0.470613	0.303686	-1.54967	0.121221	0.266862	A0A0H5QLQ4	ANK_REP_REGION domain-containing protein (Fragment)
TCONS_00015065	123.592	-0.0566902	0.399501	-0.141902	0.887157	0.935845	A0A0H5QLQ4	ANK_REP_REGION domain-containing protein (Fragment)
TCONS_00012885	78.1997	0.594686	0.44011	1.35122	0.176625	0.339578	A0A0H5QLQ9	Uncharacterized protein (Fragment)
TCONS_00015452	24.542	0.519112	0.565653	0.917722	0.358765	0.535417	A0A0H5QLR7	Uncharacterized protein (Fragment)
TCONS_00006025	13.6227	-0.528077	0.608619	-0.867665	0.385578	0.558333	A0A0H5QLR9	Uncharacterized protein
TCONS_00009767	157.425	-0.73619	0.296768	-2.48069	0.0131129	0.0633694	A0A0H5QLS9	Uncharacterized protein (Fragment)
TCONS_00014086	4.90994	-0.692512	0.739596	-0.936338	0.349099	0.526064	A0A0H5QLT1	Uncharacterized protein
TCONS_00008796	9.39614	-0.308778	0.778031	-0.396871	0.691462	0.807216	A0A0H5QLT2	Uncharacterized protein
TCONS_00011240	79.5892	1.41024	0.398162	3.54188	0.000397282	0.00568076	A0A0H5QLT8	Uncharacterized protein
TCONS_00012703	374.23	-0.531015	0.302289	-1.75665	0.0789777	0.201325	A0A0H5QLT9	Uncharacterized protein
TCONS_00007553	19.9565	0.994189	0.50734	1.95961	0.0500414	0.149877	A0A0H5QLX6	Uncharacterized protein (Fragment)
TCONS_00011360	34.9226	-0.73955	0.481931	-1.53456	0.124893	0.272203	A0A0H5QLY7	Uncharacterized protein
TCONS_00002943	36.8332	0.449332	0.507774	0.884905	0.376208	0.550495	A0A0H5QLZ3	Uncharacterized protein (Fragment)
TCONS_00016240	52.7972	0.225433	0.517816	0.435353	0.663306	0.787812	A0A0H5QM12	Uncharacterized protein (Fragment)
TCONS_00012910	8.44734	1.04272	0.74199	1.4053	0.159933	0.318865	A0A0H5QM13	Uncharacterized protein (Fragment)
TCONS_00005990	308.371	0.432943	0.459928	0.941327	0.346537	0.524019	A0A0H5QM19	DM10 domain-containing protein (Fragment)
TCONS_00008606	4.38828	-0.972354	0.802095	-1.21227	0.22541	0.397141	A0A0H5QM50	Uncharacterized protein (Fragment)
TCONS_00015912	52.6813	-0.757915	0.403846	-1.87675	0.060553	0.170071	A0A0H5QM67	Uncharacterized protein (Fragment)
TCONS_00016453	11.9517	-0.259497	0.604428	-0.429327	0.667685	0.79166	A0A0H5QM67	Uncharacterized protein (Fragment)
TCONS_00015561	8.61209	0.12942	0.692237	0.186959	0.851693	0.912912	A0A0H5QM67	Uncharacterized protein (Fragment)
TCONS_00007715	15.9938	0.207532	0.543292	0.381989	0.70247	0.814226	A0A0H5QM70	4HBT domain-containing protein (Fragment)
TCONS_00015403	53.4421	0.765155	0.364471	2.09936	0.0357855	0.120334	A0A0H5QM71	Uncharacterized protein
TCONS_00000016	5.17485	0.201503	0.730208	0.275952	0.782585	0.86702	A0A0H5QM74	Uncharacterized protein (Fragment)
TCONS_00009615	100.439	1.06713	0.589342	1.81071	0.0701853	0.18643	A0A0H5QM76	Uncharacterized protein
TCONS_00000894	4.90455	2.03361	0.789751	2.575	0.0100241	0.0537006	A0A0H5QM78	Uncharacterized protein
TCONS_00000893	12.8854	-0.466596	0.667033	-0.699509	0.484234	0.649947	A0A0H5QM78	Uncharacterized protein
TCONS_00008076	101.148	1.21986	0.451162	2.70382	0.00685482	0.0416847	A0A0H5QM87	Uncharacterized protein
TCONS_00007665	59.0317	-0.155782	0.364511	-0.427371	0.669109	0.792661	A0A0H5QM92	Uncharacterized protein
TCONS_00016110	66.4154	-1.22026	0.42701	-2.85768	0.00426745	0.0303257	A0A0H5QM98	DDE Tnp4 domain-containing protein
TCONS_00008804	67.8592	1.34697	0.35894	3.75263	0.000174987	0.00340045	A0A0H5QMA0	Major facilitator superfamily domain-containing protein 5 (Molybdate transporter 2 homolog) (Molybdate-anion transporter)
TCONS_00000190	55.2674	0.368035	0.478032	0.769896	0.441362	0.61271	A0A0H5QMA1	Uncharacterized protein (Fragment)
TCONS_00011072	135.147	-0.26775	0.400647	-0.668294	0.503946	0.666023	A0A0H5QMA3	Uncharacterized protein (Fragment)
TCONS_00006970	18.4912	0.880482	0.566499	1.55425	0.120124	0.265363	A0A0H5QMA9	Uncharacterized protein
TCONS_00004288	48.4003	0.391624	0.418113	0.936645	0.348941	0.526064	A0A0H5QMB1	Uncharacterized protein
TCONS_00001423	59.1222	1.42505	0.517218	2.75522	0.00586532	0.0372362	A0A0H5QMC3	NAD(P)-bd_dom domain-containing protein
TCONS_00005670	63.3775	-0.929536	0.431571	-2.15384	0.0312524	0.109872	A0A0H5QMD3	Uncharacterized protein
TCONS_00013923	44.289	-0.180791	0.4015	-0.450288	0.652503	0.779835	A0A0H5QMD6	Uncharacterized protein (Fragment)
TCONS_00015978	17.6759	-0.812449	0.564162	-1.4401	0.149839	0.306543	A0A0H5QME3	Retrotrans_gag domain-containing protein
TCONS_00015487	5.24823	-0.667361	0.748891	-0.891133	0.372858	0.547428	A0A0H5QME6	Uncharacterized protein (Fragment)
TCONS_00012862	16.6835	-0.88988	0.561967	-1.58351	0.113306	0.255841	A0A0H5QME8	Uncharacterized protein
TCONS_00010230	4.49284	-1.10789	0.758057	-1.46148	0.143883	0.298861	A0A0H5QME9	tRNA-dihydrouridine synthase (EC 1.3.1.-)
TCONS_00010385	32.4394	-1.1997	0.472576	-2.53864	0.0111285	0.0570088	A0A0H5QMG6	Uncharacterized protein (Fragment)
TCONS_00015844	27.457	-1.29602	0.483065	-2.6829	0.00729865	0.0434511	A0A0H5QMH7	Uncharacterized protein
TCONS_00009720	58.5821	0.652775	0.47192	1.38323	0.166594	0.327456	A0A0H5QMH9	Uncharacterized protein (Fragment)
TCONS_00005673	11350	1.35346	0.319285	4.23904	2.2448e-05	0.000943555	A0A0H5QMI1	Uncharacterized protein (Fragment)
TCONS_00001549	54.6625	1.54699	0.459597	3.36596	0.000762778	0.00892252	A0A0H5QMJ6	Uncharacterized protein (Fragment)
TCONS_00013317	78.8893	-1.14962	0.386592	-2.97373	0.00294205	0.023013	A0A0H5QMK9	Uncharacterized protein (Fragment)
TCONS_00008628	6.47345	-0.241346	0.726238	-0.332323	0.739645	0.840158	A0A0H5QML3	Uncharacterized protein
TCONS_00008728	117.243	-0.110512	0.362084	-0.30521	0.760206	0.852849	A0A0H5QMM4	Uncharacterized protein (Fragment)
TCONS_00010071	32.0946	2.6957	0.541322	4.97985	6.36341e-07	0.000105826	A0A0H5QMM6	Uncharacterized protein
TCONS_00016418	24.5201	0.521328	0.497246	1.04843	0.29444	0.473163	A0A0H5QMM8	Uncharacterized protein
TCONS_00014286	60.3955	-1.56638	0.433685	-3.6118	0.000304078	0.00475704	A0A0H5QMN5	Uncharacterized protein
TCONS_00009643	11.2297	0.927627	0.633732	1.46375	0.143262	0.297979	A0A0H5QMP0	ANK_REP_REGION domain-containing protein (Fragment)
TCONS_00001941	346.235	-1.32855	0.341434	-3.89107	9.98013e-05	0.00232234	A0A0H5QMP1	Uncharacterized protein (Fragment)
TCONS_00011804	6.10189	1.52578	0.752156	2.02854	0.0425048	0.134642	A0A0H5QMQ4	Uncharacterized protein
TCONS_00011801	35.0949	-0.708734	0.407476	-1.73933	0.0819776	0.205602	A0A0H5QMQ4	Uncharacterized protein
TCONS_00001760	50.1359	1.37828	0.383431	3.59461	0.000324883	0.00498067	A0A0H5QMR3	Uncharacterized protein
TCONS_00003112	6.96392	-0.101262	0.658885	-0.153687	0.877857	0.930139	A0A0H5QMR8	Uncharacterized protein
TCONS_00009396	17.2961	-0.728383	0.534677	-1.36229	0.173108	0.33509	A0A0H5QMS4	Uncharacterized protein (Fragment)
TCONS_00009570	23.2351	1.25767	0.491482	2.55894	0.0104992	0.0552581	A0A0H5QMT7	Uncharacterized protein
TCONS_00011443	23.1225	1.06318	0.49605	2.1433	0.0320888	0.111785	A0A0H5QMU1	Uncharacterized protein (Fragment)
TCONS_00011444	64.5754	0.437911	0.470997	0.929754	0.352499	0.529059	A0A0H5QMU1	Uncharacterized protein (Fragment)
TCONS_00007981	57.3199	-0.269898	0.459873	-0.586896	0.557274	0.708988	A0A0H5QMU1	Uncharacterized protein (Fragment)
TCONS_00009320	58.673	0.406492	0.416644	0.975633	0.329246	0.507094	A0A0H5QMV4	Uncharacterized protein (Fragment)
TCONS_00005554	317.461	1.61553	0.454246	3.55652	0.000375806	0.00548546	A0A0H5QMW5	Uncharacterized protein (Fragment)
TCONS_00008417	84.8828	0.537041	0.446248	1.20346	0.228799	0.401447	A0A0H5QMY0	Uncharacterized protein
TCONS_00009177	151.369	0.850648	0.354875	2.39704	0.0165283	0.0719646	A0A0H5QMY1	Uncharacterized protein
TCONS_00008084	333.002	-0.062836	0.289743	-0.216868	0.828311	0.898296	A0A0H5QMY2	Telo_bind domain-containing protein
TCONS_00006761	56.2958	0.820614	0.485614	1.68985	0.0910575	0.220649	A0A0H5QMY5	Uncharacterized protein (Fragment)
TCONS_00016575	17.7639	-0.0226166	0.636849	-0.0355133	0.97167	0.985193	A0A0H5QMZ8	Uncharacterized protein (Fragment)
TCONS_00007038	177.647	-0.723075	0.289954	-2.49376	0.0126399	0.0615894	A0A0H5QN03	Uncharacterized protein
TCONS_00014183	20.1229	-0.626786	0.484361	-1.29405	0.19565	0.362706	A0A0H5QN06	Uncharacterized protein (Fragment)
TCONS_00016116	30.6356	-0.219656	0.508407	-0.432048	0.665706	0.789804	A0A0H5QN07	Uncharacterized protein (Fragment)
TCONS_00013980	4.00649	0.407469	0.757193	0.538131	0.590487	0.733673	A0A0H5QN11	Uncharacterized protein (Fragment)
TCONS_00000738	28.9969	0.928192	0.511416	1.81494	0.0695324	0.185538	A0A0H5QN17	Uncharacterized protein (Fragment)
TCONS_00001795	69.7602	-0.548474	0.371634	-1.47584	0.139986	0.293155	A0A0H5QN19	Uncharacterized protein (Fragment)
TCONS_00008353	91.8753	0.161028	0.377233	0.426866	0.669477	0.792801	A0A0H5QN21	CBS domain-containing protein
TCONS_00005916	57.2039	-0.565302	0.402107	-1.40585	0.159768	0.318805	A0A0H5QN24	Rhomboid domain-containing protein
TCONS_00005464	28.7978	0.63906	0.462617	1.3814	0.167156	0.328051	A0A0H5QN52	Uncharacterized protein (Fragment)
TCONS_00011250	8.8091	-0.663335	0.650782	-1.01929	0.308066	0.486118	A0A0H5QN53	Uncharacterized protein
TCONS_00007598	74.8937	0.81991	0.52002	1.57669	0.114867	0.257995	A0A0H5QN64	Uncharacterized protein
TCONS_00016361	58.9785	-0.45453	0.39796	-1.14215	0.253391	0.428669	A0A0H5QN65	Uncharacterized protein
TCONS_00010003	114.468	-0.856102	0.35505	-2.41122	0.0158993	0.0707599	A0A0H5QN66	FYVE-type domain-containing protein
TCONS_00003650	12.2983	0.366153	0.623778	0.586992	0.557209	0.708988	A0A0H5QN74	Uncharacterized protein (Fragment)
TCONS_00013802	225.281	2.56117	0.447776	5.71975	1.06679e-08	5.44064e-06	A0A0H5QN77	Uncharacterized protein
TCONS_00015693	9.3298	-0.455257	0.600659	-0.757929	0.448493	0.619086	A0A0H5QN78	Uncharacterized protein
TCONS_00011630	5.09752	-0.474778	0.75394	-0.629729	0.528872	0.685857	A0A0H5QN78	Uncharacterized protein
TCONS_00004526	70.0767	-0.281178	0.350581	-0.802034	0.422533	0.595282	A0A0H5QN83	Component of oligomeric Golgi complex 7 (Conserved oligomeric Golgi complex subunit 7)
TCONS_00012548	329.812	-0.425438	0.279359	-1.52291	0.127781	0.276059	A0A0H5QN92	Uncharacterized protein (Fragment)
TCONS_00010903	56.3025	0.0826347	0.405185	0.203943	0.838398	0.904491	A0A0H5QNA7	Uncharacterized protein (Fragment)
TCONS_00000761	16.7556	0.494526	0.529148	0.93457	0.35001	0.526874	A0A0H5QNB1	Uncharacterized protein (Fragment)
TCONS_00012091	158.085	-0.818011	0.308067	-2.6553	0.0079237	0.0460455	A0A0H5QNC0	LisH domain-containing protein
TCONS_00009919	66.3441	0.763655	0.415784	1.83666	0.0662597	0.179365	A0A0H5QNC4	Uncharacterized protein (Fragment)
TCONS_00012759	77.5624	0.979198	0.54301	1.80328	0.0713445	0.188072	A0A0H5QNC7	Uncharacterized protein (Fragment)
TCONS_00015094	65.0028	0.270551	0.393435	0.687663	0.491665	0.657099	A0A0H5QND6	RING-type domain-containing protein (Fragment)
TCONS_00008824	15.5593	-0.292053	0.566264	-0.515754	0.606026	0.746013	A0A0H5QNE7	Uncharacterized protein (Fragment)
TCONS_00003074	24.8279	-0.372636	0.47342	-0.787115	0.431215	0.60296	A0A0H5QNE8	Uncharacterized protein
TCONS_00016950	19.929	-0.607338	0.523208	-1.1608	0.245724	0.419404	A0A0H5QNF0	Uncharacterized protein
TCONS_00012147	15.1378	0.00348442	0.535564	0.00650607	0.994809	0.997585	A0A0H5QNF0	Uncharacterized protein
TCONS_00013426	64.0274	0.474581	0.379971	1.24899	0.211667	0.38136	A0A0H5QNF5	Uncharacterized protein (Fragment)
TCONS_00016081	75.2851	-0.75263	0.333856	-2.25436	0.0241736	0.0925042	A0A0H5QNF8	Uncharacterized protein
TCONS_00004078	250.099	-0.268612	0.326166	-0.823543	0.410199	0.58214	A0A0H5QNG3	Uncharacterized protein
TCONS_00004287	237.553	1.33904	0.390876	3.42574	0.000613116	0.00777091	A0A0H5QNI1	Uncharacterized protein
TCONS_00000622	81.5232	0.300026	0.407905	0.735529	0.462018	0.630586	A0A0H5QNI2	RING-type domain-containing protein
TCONS_00007948	107.098	-0.313794	0.340762	-0.920862	0.357123	0.533406	A0A0H5QNJ0	Uncharacterized protein (Fragment)
TCONS_00008338	145.011	-0.827361	0.357059	-2.31716	0.0204952	0.0830885	A0A0H5QNK6	DNA helicase (EC 3.6.4.12)
TCONS_00006725	25.8056	1.04674	0.44891	2.33173	0.0197146	0.081128	A0A0H5QNK7	Uncharacterized protein
TCONS_00000381	7.11569	0.277722	0.726186	0.382439	0.702136	0.814209	A0A0H5QNL0	Uncharacterized protein (Fragment)
TCONS_00010229	6.26742	-0.41961	0.732381	-0.57294	0.566686	0.716586	A0A0H5QNL7	Uncharacterized protein (Fragment)
TCONS_00008340	73.3445	1.22388	0.510922	2.39542	0.0166011	0.0721952	A0A0H5QNL9	Uncharacterized protein
TCONS_00014139	18.4688	-1.31842	0.611189	-2.15715	0.0309942	0.109316	A0A0H5QNM3	Uncharacterized protein
TCONS_00006492	20.0419	0.838851	0.589818	1.42222	0.154963	0.312623	A0A0H5QNM6	Uncharacterized protein (Fragment)
TCONS_00011092	85.4516	2.1671	0.530369	4.08603	4.38816e-05	0.0014162	A0A0H5QNN7	Uncharacterized protein (Fragment)
TCONS_00006899	13.2349	0.289643	0.538151	0.538219	0.590426	0.733673	A0A0H5QNQ4	Uncharacterized protein (Fragment)
TCONS_00007334	44.24	-0.522873	0.588214	-0.888916	0.374048	0.548594	A0A0H5QNR2	PWWP domain-containing protein (Fragment)
TCONS_00004314	23.0468	1.41657	0.529365	2.67598	0.00745103	0.0440497	A0A0H5QNR4	Uncharacterized protein (Fragment)
TCONS_00009259	4208.22	2.2224	0.529055	4.2007	2.6609e-05	0.00105587	A0A0H5QNS4	Uncharacterized protein (Fragment)
TCONS_00010093	120.195	0.559217	0.494974	1.12979	0.258564	0.433015	A0A0H5QNS6	Chitin synthase (EC 2.4.1.16) (Fragment)
TCONS_00008846	14.5546	1.18536	0.573419	2.06718	0.0387172	0.126576	A0A0H5QNT9	Uncharacterized protein
TCONS_00000574	3261.59	2.13585	0.517957	4.12362	3.72969e-05	0.0012681	A0A0H5QNX2	Uncharacterized protein
TCONS_00015459	17.6335	-0.476466	0.525284	-0.907064	0.364373	0.540833	A0A0H5QNX3	Uncharacterized protein (Fragment)
TCONS_00015919	14.2813	-0.203027	0.681974	-0.297705	0.765928	0.856364	A0A0H5QNX3	Uncharacterized protein (Fragment)
TCONS_00014979	5.11236	-0.0792819	0.725511	-0.109277	0.912983	0.950894	A0A0H5QNX4	VPS9 domain-containing protein
TCONS_00002749	22.0385	0.0998427	0.53116	0.187971	0.850899	0.912572	A0A0H5QNY8	Peptidase_S8 domain-containing protein (Fragment)
TCONS_00006388	5.84151	0.392651	0.754962	0.520094	0.602998	0.743888	A0A0H5QP04	Uncharacterized protein
TCONS_00016844	39.4147	0.0138567	0.428378	0.032347	0.974195	0.986054	A0A0H5QP04	Uncharacterized protein
TCONS_00002924	37.9764	1.28877	0.586284	2.1982	0.0279348	0.102347	A0A0H5QP09	Uncharacterized protein (Fragment)
TCONS_00008038	5.05158	0.786736	0.778511	1.01057	0.312224	0.490253	A0A0H5QP11	Uncharacterized protein
TCONS_00001299	10.0662	0.307806	0.669326	0.459875	0.645606	0.774848	A0A0H5QP11	Uncharacterized protein (Fragment)
TCONS_00011617	13.3074	-0.146455	0.636186	-0.230207	0.817931	0.892606	A0A0H5QP16	UBA domain-containing protein (Fragment)
TCONS_00012934	62.6846	1.38928	0.502311	2.76577	0.0056789	0.0364669	A0A0H5QP22	Uncharacterized protein (Fragment)
TCONS_00010781	19.9788	-1.43713	0.522215	-2.75199	0.00592349	0.0374811	A0A0H5QP26	Uncharacterized protein (Fragment)
TCONS_00009980	55.0672	-0.693506	0.373908	-1.85475	0.0636322	0.17504	A0A0H5QP38	RED_N domain-containing protein (Fragment)
TCONS_00013870	45.943	1.37124	0.380187	3.60676	0.000310044	0.00480281	A0A0H5QP68	Uncharacterized protein
TCONS_00013869	14.8697	1.42092	0.588792	2.41327	0.01581	0.070729	A0A0H5QP68	Uncharacterized protein
TCONS_00014214	102.252	1.2707	0.47812	2.6577	0.00786765	0.0458685	A0A0H5QP70	Uncharacterized protein (Fragment)
TCONS_00008540	16.3671	1.5095	0.557196	2.7091	0.00674657	0.0412051	A0A0H5QP71	Uncharacterized protein (Fragment)
TCONS_00009892	20.8965	-0.430257	0.606136	-0.709836	0.477806	0.644916	A0A0H5QP71	Uncharacterized protein (Fragment)
TCONS_00012046	113.249	0.304193	0.350531	0.867806	0.385501	0.558326	A0A0H5QP76	Uncharacterized protein
TCONS_00010929	15.5154	1.7942	0.654647	2.74071	0.00613057	0.0384732	A0A0H5QP83	Uncharacterized protein (Fragment)
TCONS_00013844	60.4218	0.0250447	0.421716	0.0593877	0.952643	0.973614	A0A0H5QP86	MFS domain-containing protein
TCONS_00006642	18.1228	0.804483	0.59143	1.36023	0.173756	0.33575	A0A0H5QP87	Uncharacterized protein (Fragment)
TCONS_00006643	29.6106	0.495199	0.602255	0.822241	0.41094	0.582921	A0A0H5QP87	Uncharacterized protein (Fragment)
TCONS_00002496	146.015	1.19942	0.456597	2.62687	0.00861751	0.0485091	A0A0H5QP88	Sulfatase domain-containing protein (Fragment)
TCONS_00003320	8.76409	-1.5117	0.665162	-2.27268	0.0230452	0.0895473	A0A0H5QP92	Uncharacterized protein (Fragment)
TCONS_00004974	4.79779	1.09705	0.747596	1.46743	0.142258	0.297099	A0A0H5QP93	Uncharacterized protein (Fragment)
TCONS_00013404	46.4086	0.866424	0.430588	2.01219	0.0442001	0.138295	A0A0H5QP97	Centrosomal protein of 19 kDa
TCONS_00014291	37.0915	-0.721057	0.480947	-1.49924	0.13381	0.284815	A0A0H5QP98	Uncharacterized protein (Fragment)
TCONS_00011807	142.977	1.55566	0.454193	3.4251	0.000614562	0.00777091	A0A0H5QPA3	Uncharacterized protein (Fragment)
TCONS_00010116	95.7846	0.526237	0.390608	1.34723	0.177908	0.341272	A0A0H5QPC4	Uncharacterized protein
TCONS_00006178	29.2115	0.387867	0.423663	0.915509	0.359924	0.536517	A0A0H5QPE4	Uncharacterized protein
TCONS_00006177	4.87857	0.598684	0.722619	0.828492	0.407392	0.579284	A0A0H5QPE4	Uncharacterized protein
TCONS_00014691	17.8834	2.7395	0.679603	4.03103	5.55337e-05	0.00160921	A0A0H5QPE7	Uncharacterized protein (Fragment)
TCONS_00012616	19.9841	1.23626	0.686143	1.80175	0.0715846	0.188575	A0A0H5QPE7	Uncharacterized protein (Fragment)
TCONS_00002249	26.7744	0.521768	0.524784	0.994253	0.3201	0.497817	A0A0H5QPF2	Uncharacterized protein
TCONS_00006487	9.12161	2.59815	0.677836	3.833	0.000126589	0.00268018	A0A0H5QPF3	Uncharacterized protein (Fragment)
TCONS_00015265	4.77133	-1.06854	0.759595	-1.40672	0.159509	0.318519	A0A0H5QPF7	Uncharacterized protein (Fragment)
TCONS_00013207	27.2855	-0.570074	0.50112	-1.1376	0.255288	0.430546	A0A0H5QPF7	Uncharacterized protein (Fragment)
TCONS_00011925	18.403	1.67716	0.586986	2.85725	0.00427335	0.0303257	A0A0H5QPG1	Uncharacterized protein
TCONS_00000796	8.00707	0.533965	0.744936	0.716794	0.473502	0.640886	A0A0H5QPH1	Uncharacterized protein
TCONS_00011083	4.14002	-0.738164	0.794898	-0.928627	0.353082	0.529382	A0A0H5QPI4	Uncharacterized protein (Fragment)
TCONS_00006110	34.3577	1.4184	0.577954	2.45417	0.0141209	0.0663952	A0A0H5QPI8	Uncharacterized protein (Fragment)
TCONS_00014382	238.721	2.3556	0.504284	4.67118	2.99478e-06	0.000251759	A0A0H5QPK0	Uncharacterized protein (Fragment)
TCONS_00006184	190.41	-0.781844	0.303406	-2.57689	0.00996935	0.0535245	A0A0H5QPK7	Uncharacterized protein (Fragment)
TCONS_00003912	17.0844	1.47739	0.64452	2.29223	0.0218925	0.0867772	A0A0H5QPK7	Uncharacterized protein (Fragment)
TCONS_00011254	5.93721	-0.836526	0.738339	-1.13298	0.257221	0.431523	A0A0H5QPL4	Uncharacterized protein (Fragment)
TCONS_00001499	126.889	1.28796	0.359642	3.58122	0.000341991	0.00517042	A0A0H5QPM0	Lon N-terminal domain-containing protein
TCONS_00001736	9.99003	-0.30456	0.626339	-0.486255	0.626786	0.762314	A0A0H5QPM9	Uncharacterized protein
TCONS_00004678	15.3423	0.187538	0.640458	0.292819	0.769661	0.858921	A0A0H5QPN2	Uncharacterized protein (Fragment)
TCONS_00007946	209.48	0.516952	0.376753	1.37212	0.170025	0.33088	A0A0H5QPN3	Uncharacterized protein
TCONS_00008085	12.1548	-0.0187653	0.596314	-0.0314689	0.974896	0.986142	A0A0H5QPN4	Uncharacterized protein (Fragment)
TCONS_00004743	87.0487	1.24281	0.369072	3.36739	0.000758822	0.00892252	A0A0H5QPN9	Uncharacterized protein (Fragment)
TCONS_00016887	8.27337	-1.22133	0.638896	-1.91163	0.0559241	0.161259	A0A0H5QPP1	Uncharacterized protein (Fragment)
TCONS_00006593	4.04288	0.821943	0.804698	1.02143	0.30705	0.484947	A0A0H5QPQ5	Cyclic nucleotide-binding domain-containing protein (Fragment)
TCONS_00015704	13.613	2.07703	0.589239	3.52494	0.000423578	0.00600069	A0A0H5QPQ8	Uncharacterized protein
TCONS_00004077	46.7399	1.99983	0.496432	4.02841	5.61556e-05	0.0016211	A0A0H5QPR0	Uncharacterized protein
TCONS_00007678	88.2294	0.562526	0.468055	1.20184	0.229427	0.401996	A0A0H5QPR7	Uncharacterized protein (Fragment)
TCONS_00003009	12.5703	0.10302	0.597812	0.172328	0.86318	0.920581	A0A0H5QPU0	Uncharacterized protein (Fragment)
TCONS_00008783	8.62581	2.65725	0.693523	3.83152	0.000127354	0.00268392	A0A0H5QPX3	Uncharacterized protein (Fragment)
TCONS_00011539	2528.26	1.71861	0.47463	3.62095	0.000293521	0.00462977	A0A0H5QPZ3	Uncharacterized protein (Fragment)
TCONS_00013772	18.4335	1.58466	0.624705	2.53665	0.0111919	0.0571548	A0A0H5QPZ5	Uncharacterized protein
TCONS_00015426	19.6489	-0.513997	0.512178	-1.00355	0.315594	0.49325	A0A0H5QPZ5	Uncharacterized protein
TCONS_00012455	66.8376	-0.700642	0.377283	-1.85707	0.063301	0.174317	A0A0H5QQ03	Uncharacterized protein (Fragment)
TCONS_00005876	700.802	2.97658	0.420789	7.07382	1.50727e-12	1.15306e-08	A0A0H5QQ08	Uncharacterized protein
TCONS_00010746	10.8202	1.15341	0.675628	1.70716	0.0877919	0.215446	A0A0H5QQ30	Uncharacterized protein
TCONS_00001604	15.8992	0.36887	0.572867	0.643902	0.519639	0.678021	A0A0H5QQ33	Uncharacterized protein
TCONS_00015908	16.5334	-0.34374	0.539296	-0.637386	0.523873	0.681828	A0A0H5QQ36	Uncharacterized protein
TCONS_00013443	10.3108	0.299488	0.59322	0.504852	0.613663	0.752447	A0A0H5QQ39	Uncharacterized protein (Fragment)
TCONS_00014497	7.9292	0.276015	0.670411	0.41171	0.680552	0.79899	A0A0H5QQ39	Uncharacterized protein (Fragment)
TCONS_00016040	34.243	-0.0598697	0.43332	-0.138165	0.89011	0.937409	A0A0H5QQ39	Uncharacterized protein (Fragment)
TCONS_00005872	416.385	1.17361	0.362803	3.23485	0.00121707	0.0122993	A0A0H5QQ41	Uncharacterized protein (Fragment)
TCONS_00012084	59.7768	0.111274	0.364434	0.305334	0.760112	0.852849	A0A0H5QQ48	Uncharacterized protein (Fragment)
TCONS_00007569	45.9784	0.199458	0.414913	0.480723	0.630714	0.764539	A0A0H5QQ58	TOG domain-containing protein
TCONS_00011190	21.2664	1.55833	0.561001	2.77777	0.00547333	0.0357872	A0A0H5QQ70	Uncharacterized protein (Fragment)
TCONS_00013278	3.94374	-1.33026	0.783659	-1.6975	0.0896029	0.218194	A0A0H5QQ86	Uncharacterized protein
TCONS_00010922	35439.4	1.58198	0.552225	2.86473	0.00417365	0.0298396	A0A0H5QQ93	Uncharacterized protein
TCONS_00012983	7.13764	0.321945	0.713646	0.451127	0.651898	0.779593	A0A0H5QQ98	Uncharacterized protein (Fragment)
TCONS_00008950	907.287	2.16872	0.516594	4.19812	2.69144e-05	0.00105587	A0A0H5QQA4	Uncharacterized protein (Fragment)
TCONS_00003616	7.07967	-1.53045	0.686464	-2.22946	0.0257831	0.0967815	A0A0H5QQA4	Uncharacterized protein (Fragment)
TCONS_00013818	9.74529	-0.50979	0.652757	-0.780981	0.434814	0.605816	A0A0H5QQB2	MULE domain-containing protein (Fragment)
TCONS_00000436	4.45255	0.776212	0.800644	0.969485	0.332303	0.509951	A0A0H5QQB3	Uncharacterized protein (Fragment)
TCONS_00009266	94.9299	-0.14365	0.340446	-0.421945	0.673065	0.794886	A0A0H5QQC4	Uncharacterized protein (Fragment)
TCONS_00012716	27.5482	2.16837	0.593094	3.65603	0.000256154	0.00426842	A0A0H5QQC7	Uncharacterized protein (Fragment)
TCONS_00009894	60.3591	1.56863	0.486826	3.22216	0.00127228	0.0127561	A0A0H5QQD6	Uncharacterized protein (Fragment)
TCONS_00009203	163.775	0.839988	0.395907	2.12168	0.0338649	0.11584	A0A0H5QQE1	Phosphodiesterase (EC 3.1.4.-)
TCONS_00002895	115.982	-0.164646	0.323677	-0.508675	0.61098	0.749879	A0A0H5QQE5	Uncharacterized protein
TCONS_00013949	444.708	1.79777	0.541473	3.32015	0.000899686	0.0099316	A0A0H5QQE8	Uncharacterized protein (Fragment)
TCONS_00015768	39.8776	1.00454	0.508632	1.97499	0.0482692	0.146384	A0A0H5QQG9	Uncharacterized protein (Fragment)
TCONS_00004237	4.09704	0.494532	0.742433	0.666097	0.505349	0.666883	A0A0H5QQH2	PH domain-containing protein (Fragment)
TCONS_00004086	6.16727	0.806683	0.786269	1.02596	0.304909	0.482725	A0A0H5QQH7	Uncharacterized protein (Fragment)
TCONS_00012032	66.9201	-0.342129	0.38281	-0.893731	0.371466	0.546483	A0A0H5QQI0	Uncharacterized protein (Fragment)
TCONS_00015617	32.9742	-0.52679	0.424378	-1.24132	0.214486	0.384698	A0A0H5QQI5	RING-type domain-containing protein
TCONS_00011629	139.125	1.161	0.438236	2.64925	0.00806699	0.0466458	A0A0H5QQI6	Aa_trans domain-containing protein
TCONS_00003183	21.22	1.88933	0.545431	3.46393	0.000532348	0.00696148	A0A0H5QQI8	Uncharacterized protein (Fragment)
TCONS_00003182	27.1197	0.503201	0.553548	0.909048	0.363325	0.539801	A0A0H5QQI8	Uncharacterized protein (Fragment)
TCONS_00007389	65.321	1.0846	0.441823	2.45484	0.0140948	0.0663132	A0A0H5QQJ3	Uncharacterized protein (Fragment)
TCONS_00005809	25.8299	0.837941	0.513905	1.63054	0.102988	0.239471	A0A0H5QQJ5	Uncharacterized protein (Fragment)
TCONS_00008108	106.731	-0.137293	0.378076	-0.363135	0.716504	0.824649	A0A0H5QQJ8	Uncharacterized protein
TCONS_00008242	34.673	0.667933	0.436271	1.53101	0.125768	0.27333	A0A0H5QQL3	Cyclic nucleotide-binding domain-containing protein (Fragment)
TCONS_00004189	12.9129	0.572544	0.757339	0.755994	0.449653	0.620127	A0A0H5QQL5	Uncharacterized protein (Fragment)
TCONS_00014780	31.5852	-1.3689	0.434113	-3.15332	0.00161422	0.0152832	A0A0H5QQN6	Uncharacterized protein (Fragment)
TCONS_00006031	17.1269	-0.880311	0.603261	-1.45925	0.144495	0.299969	A0A0H5QQN8	Uncharacterized protein (Fragment)
TCONS_00006871	204.36	1.28554	0.456244	2.81766	0.00483747	0.032924	A0A0H5QQP8	Uncharacterized protein (Fragment)
TCONS_00012997	21.6067	1.00962	0.548772	1.83979	0.0657998	0.178906	A0A0H5QQQ2	Uncharacterized protein (Fragment)
TCONS_00012394	24.3316	1.52715	0.559714	2.72845	0.00636334	0.0395447	A0A0H5QQQ3	Uncharacterized protein (Fragment)
TCONS_00013003	13.8805	0.270757	0.597122	0.453437	0.650234	0.778571	A0A0H5QQQ4	C2 domain-containing protein (Fragment)
TCONS_00015990	7610.21	1.92164	0.535068	3.5914	0.00032891	0.00502453	A0A0H5QQQ7	Uncharacterized protein (Fragment)
TCONS_00006111	28.4837	1.91358	0.48786	3.9224	8.76727e-05	0.00215658	A0A0H5QQR2	Uncharacterized protein (Fragment)
TCONS_00004572	29.5647	1.34476	0.616998	2.17952	0.0292933	0.105605	A0A0H5QQS3	Uncharacterized protein (Fragment)
TCONS_00008497	95.1791	0.83016	0.404116	2.05426	0.0399505	0.129391	A0A0H5QQS6	Uncharacterized protein (Fragment)
TCONS_00002363	106.43	2.50121	0.446983	5.59576	2.19657e-08	8.40187e-06	A0A0H5QQT7	Uncharacterized protein
TCONS_00011186	38.7335	2.48286	0.522351	4.75323	2.00191e-06	0.000213515	A0A0H5QQT7	Uncharacterized protein
TCONS_00001682	7.66528	-0.926965	0.660405	-1.40363	0.160429	0.319438	A0A0H5QQT7	Uncharacterized protein
TCONS_00004238	17.1609	0.836731	0.538324	1.55433	0.120107	0.265363	A0A0H5QQV6	FHA domain-containing protein (Fragment)
TCONS_00005930	10494.2	1.90741	0.52179	3.65552	0.000256663	0.00426842	A0A0H5QQW5	SUEL-type lectin domain-containing protein (Fragment)
TCONS_00003181	59.3661	0.560883	0.436301	1.28554	0.198603	0.365923	A0A0H5QQW8	Uncharacterized protein
TCONS_00015143	28.3227	0.629428	0.64291	0.97903	0.327565	0.505387	A0A0H5QQX3	Uncharacterized protein (Fragment)
TCONS_00012259	40.7232	-0.850999	0.431853	-1.97057	0.0487726	0.147126	A0A0H5QQY0	Uncharacterized protein (Fragment)
TCONS_00011383	12.0644	0.8467	0.715358	1.1836	0.23657	0.410191	A0A0H5QQY0	Uncharacterized protein (Fragment)
TCONS_00008051	1637.7	2.04494	0.530417	3.85533	0.000115572	0.00252607	A0A0H5QQY3	Uncharacterized protein
TCONS_00012096	27.437	-0.405181	0.464198	-0.872863	0.382738	0.556009	A0A0H5QQY5	Uncharacterized protein (Fragment)
TCONS_00001075	87.7893	1.11194	0.388945	2.85886	0.00425165	0.0302559	A0A0H5QQY7	Uncharacterized protein (Fragment)
TCONS_00005212	31.923	2.06814	0.499188	4.143	3.42788e-05	0.00120844	A0A0H5QQY8	Uncharacterized protein
TCONS_00006640	29.2377	0.763784	0.534538	1.42887	0.153042	0.310171	A0A0H5QQZ4	Uncharacterized protein (Fragment)
TCONS_00003910	10.0311	0.805028	0.711096	1.1321	0.257594	0.431959	A0A0H5QQZ6	Uncharacterized protein
TCONS_00016605	12.1906	-0.404735	0.648618	-0.623996	0.53263	0.68864	A0A0H5QR01	CCHC-type domain-containing protein
TCONS_00010540	68.8557	-0.495842	0.430711	-1.15122	0.249643	0.424581	A0A0H5QR24	CCHC-type domain-containing protein (Fragment)
TCONS_00003574	10.3941	1.56751	0.648129	2.41851	0.015584	0.0701694	A0A0H5QR27	UDENN domain-containing protein
TCONS_00003571	7.12311	0.925752	0.739727	1.25148	0.21076	0.380353	A0A0H5QR27	UDENN domain-containing protein
TCONS_00010737	32.7386	2.32765	0.535731	4.34481	1.39395e-05	0.000703154	A0A0H5QR31	Uncharacterized protein (Fragment)
TCONS_00007063	29.8305	1.89383	0.531155	3.5655	0.000363159	0.00536741	A0A0H5QR31	Uncharacterized protein (Fragment)
TCONS_00004183	26.6788	1.50593	0.491031	3.06687	0.00216311	0.0185306	A0A0H5QR49	Uncharacterized protein (Fragment)
TCONS_00004160	4.77373	1.06192	0.73416	1.44644	0.148053	0.303891	A0A0H5QR49	Uncharacterized protein (Fragment)
TCONS_00001632	94.8033	1.11068	0.391891	2.83415	0.00459477	0.0317812	A0A0H5QR53	F-box domain-containing protein (Fragment)
TCONS_00004953	147.051	0.848578	0.347146	2.44444	0.0145076	0.0672483	A0A0H5QR56	Uncharacterized protein (Fragment)
TCONS_00013485	33.7892	-1.26773	0.473235	-2.67885	0.0073875	0.0438436	A0A0H5QR60	Mediator of RNA polymerase II transcription subunit 1 (Mediator complex subunit 1)
TCONS_00012492	8.73913	1.80557	0.659163	2.73919	0.00615909	0.0385319	A0A0H5QR74	Uncharacterized protein (Fragment)
TCONS_00014726	6.20143	1.04943	0.786806	1.33378	0.182275	0.347206	A0A0H5QR78	Uncharacterized protein (Fragment)
TCONS_00014321	18.7146	0.567058	0.644251	0.880182	0.378761	0.55254	A0A0H5QR89	Uncharacterized protein (Fragment)
TCONS_00007211	186.377	0.163084	0.298297	0.546716	0.584574	0.72905	A0A0H5QR97	Uncharacterized protein (Fragment)
TCONS_00013831	138.979	1.06406	0.391697	2.71655	0.00659663	0.0405735	A0A0H5QRA4	Uncharacterized protein (Fragment)
TCONS_00005738	95.8855	0.440819	0.441141	0.999271	0.317664	0.495472	A0A0H5QRA4	Uncharacterized protein (Fragment)
TCONS_00006497	132.846	2.22203	0.511396	4.34504	1.39253e-05	0.000703154	A0A0H5QRA6	Chromo domain-containing protein (Fragment)
TCONS_00010822	11.806	0.165088	0.613894	0.268919	0.787992	0.870238	A0A0H5QRA6	Chromo domain-containing protein (Fragment)
TCONS_00015725	17.7253	1.11729	0.658228	1.69742	0.0896166	0.218194	A0A0H5QRA8	Uncharacterized protein (Fragment)
TCONS_00011280	19.7009	0.357872	0.550726	0.649818	0.51581	0.675987	A0A0H5QRA9	Uncharacterized protein
TCONS_00012936	17.5766	1.30735	0.511667	2.55507	0.0106165	0.0553874	A0A0H5QRB4	Uncharacterized protein (Fragment)
TCONS_00009029	4.30877	-1.51722	0.761156	-1.99331	0.0462271	0.142366	A0A0H5QRC3	Uncharacterized protein (Fragment)
TCONS_00014877	523.178	1.74234	0.437239	3.98486	6.75189e-05	0.00180601	A0A0H5QRC9	Uncharacterized protein (Fragment)
TCONS_00014878	284.222	1.54891	0.451787	3.42841	0.000607122	0.00775373	A0A0H5QRC9	Uncharacterized protein (Fragment)
TCONS_00003433	122.509	1.41613	0.462958	3.05886	0.00222178	0.0188189	A0A0H5QRD1	Uncharacterized protein (Fragment)
TCONS_00006067	35.0661	0.673853	0.45901	1.46806	0.142089	0.296909	A0A0H5QRF5	Uncharacterized protein (Fragment)
TCONS_00004121	4.30126	-1.63	0.797857	-2.04297	0.0410549	0.131491	A0A0H5QRF6	Uncharacterized protein
TCONS_00011425	21.3316	-1.53037	0.555734	-2.75378	0.00589106	0.0373377	A0A0H5QRF7	Uncharacterized protein
TCONS_00005320	15.9622	0.536571	0.529856	1.01267	0.311216	0.489172	A0A0H5QRH3	Uncharacterized protein (Fragment)
TCONS_00012131	31.8444	-0.329324	0.470102	-0.700537	0.483592	0.649601	A0A0H5QRH4	RAP domain-containing protein (Fragment)
TCONS_00016837	35.5661	-0.654032	0.42975	-1.52189	0.128037	0.2763	A0A0H5QRH8	Uncharacterized protein (Fragment)
TCONS_00001700	145.771	2.29382	0.485112	4.72843	2.26265e-06	0.000213695	A0A0H5QRI5	Uncharacterized protein
TCONS_00004892	104.904	2.04829	0.502001	4.08026	4.49852e-05	0.0014162	A0A0H5QRI5	Uncharacterized protein
TCONS_00008451	232.18	1.77932	0.499067	3.5653	0.00036344	0.00536741	A0A0H5QRI5	Uncharacterized protein
TCONS_00009968	20.621	0.41442	0.472945	0.876255	0.380891	0.55438	A0A0H5QRJ8	Uncharacterized protein (Fragment)
TCONS_00008172	189.142	-0.768193	0.31	-2.47804	0.0132105	0.0635658	A0A0H5QRK2	Uncharacterized protein (Fragment)
TCONS_00016876	11.6727	-1.51693	0.62912	-2.4112	0.0159002	0.0707599	A0A0H5QRK2	Uncharacterized protein (Fragment)
TCONS_00009849	51.0708	-0.413066	0.380063	-1.08684	0.277109	0.453937	A0A0H5QRM1	Uncharacterized protein
TCONS_00006823	396.173	1.01439	0.420319	2.41337	0.0158056	0.070729	A0A0H5QRP2	NodB homology domain-containing protein (Fragment)
TCONS_00002225	5.37781	1.62223	0.765895	2.11808	0.0341684	0.116587	A0A0H5QRP9	MFS domain-containing protein OS=Spongospora subterranea OX=70186 PE=4 SV=1
TCONS_00008019	49.2679	0.488689	0.412519	1.18465	0.236157	0.409754	A0A0H5QRQ0	Integrase catalytic domain-containing protein (Fragment)
TCONS_00006644	47.894	0.169391	0.415402	0.407778	0.683437	0.801271	A0A0H5QRQ6	Uncharacterized protein
TCONS_00007169	20.1687	1.67502	0.63293	2.64645	0.00813405	0.0468919	A0A0H5QRS2	Uncharacterized protein
TCONS_00016091	27.18	-0.537907	0.446758	-1.20402	0.22858	0.401248	A0A0H5QRS3	Uncharacterized protein (Fragment)
TCONS_00007840	6.559	-0.821921	0.686839	-1.19667	0.231435	0.404731	A0A0H5QRS6	NUC194 domain-containing protein (Fragment)
TCONS_00010520	46.4999	0.416482	0.460721	0.903978	0.366007	0.541891	A0A0H5QRT6	Uncharacterized protein
TCONS_00010512	10.7549	0.752453	0.578226	1.30131	0.193152	0.360393	A0A0H5QRU3	Uncharacterized protein
TCONS_00005100	77.6858	1.59391	0.472282	3.3749	0.000738413	0.00881702	A0A0H5QRU8	Uncharacterized protein (Fragment)
TCONS_00009614	7.18528	3.71127	0.770929	4.81403	1.47918e-06	0.000185503	A0A0H5QRV1	Uncharacterized protein
TCONS_00013562	84.8781	1.35872	0.519493	2.61546	0.00891064	0.0496478	A0A0H5QRW0	Uncharacterized protein (Fragment)
TCONS_00001731	51.3991	-0.719998	0.383084	-1.87948	0.060179	0.169335	A0A0H5QRW1	Uncharacterized protein
TCONS_00012884	74.4972	1.09912	0.439223	2.50243	0.0123345	0.060681	A0A0H5QRW3	Uncharacterized protein
TCONS_00011849	8.99598	1.3696	0.677324	2.02207	0.0431692	0.136071	A0A0H5QRW3	Uncharacterized protein
TCONS_00012882	35.4466	0.816143	0.561447	1.45364	0.146045	0.302063	A0A0H5QRW3	Uncharacterized protein
TCONS_00007041	13.1345	0.612234	0.557587	1.09801	0.272202	0.447912	A0A0H5QRW3	Uncharacterized protein
TCONS_00013082	3.96306	0.36788	0.748259	0.491648	0.622968	0.759816	A0A0H5QRW3	Uncharacterized protein
TCONS_00006202	124.893	0.607269	0.459561	1.32141	0.186365	0.352643	A0A0H5QRW7	F-box domain-containing protein (Fragment)
TCONS_00010547	5.42401	-0.408419	0.725076	-0.563277	0.573246	0.721723	A0A0H5QRX2	DUF4515 domain-containing protein
TCONS_00000886	10.8277	1.74608	0.722808	2.41569	0.0157055	0.0704676	A0A0H5QRY6	Uncharacterized protein (Fragment)
TCONS_00006579	130.158	1.8614	0.445248	4.1806	2.90743e-05	0.00109374	A0A0H5QRY9	Uncharacterized protein (Fragment)
TCONS_00006605	8.60248	2.87824	0.685431	4.19917	2.679e-05	0.00105587	A0A0H5QRZ3	Uncharacterized protein (Fragment)
TCONS_00008972	50.3682	1.27804	0.478721	2.66969	0.00759217	0.0447114	A0A0H5QRZ7	Uncharacterized protein (Fragment)
TCONS_00007647	13.4204	1.21077	0.579499	2.08933	0.0366779	0.12222	A0A0H5QS00	Uncharacterized protein
TCONS_00007646	11.8422	1.01693	0.610776	1.66498	0.0959175	0.228588	A0A0H5QS00	Uncharacterized protein
TCONS_00007592	207.164	1.56036	0.418115	3.7319	0.000190043	0.0035373	A0A0H5QS05	Uncharacterized protein (Fragment)
TCONS_00015858	3.82268	-0.139461	0.792446	-0.175988	0.860303	0.918922	A0A0H5QS06	Uncharacterized protein
TCONS_00002147	19.7668	-0.467901	0.567688	-0.824222	0.409814	0.581754	A0A0H5QS07	Uncharacterized protein
TCONS_00005418	149.706	0.149653	0.333351	0.448936	0.653478	0.780239	A0A0H5QS19	Uncharacterized protein
TCONS_00010108	25.999	2.41974	0.656337	3.68673	0.000227153	0.00397647	A0A0H5QS23	Uncharacterized protein (Fragment)
TCONS_00005589	84.3104	0.0900744	0.417301	0.21585	0.829105	0.898393	A0A0H5QS28	Uncharacterized protein
TCONS_00012482	12.7313	1.17491	0.67449	1.74193	0.0815208	0.20494	A0A0H5QS32	Uncharacterized protein (Fragment)
TCONS_00014340	116.986	0.467537	0.426121	1.09719	0.272557	0.448305	A0A0H5QS34	DDE-1 domain-containing protein
TCONS_00012912	27.3163	0.180493	0.492089	0.366789	0.713776	0.822967	A0A0H5QS34	DDE-1 domain-containing protein
TCONS_00011543	100.66	-0.0834351	0.379793	-0.219686	0.826116	0.897442	A0A0H5QS35	Trimethylguanosine synthase
TCONS_00013163	251.591	1.32173	0.386115	3.42316	0.000618973	0.00780444	A0A0H5QS36	Uncharacterized protein (Fragment)
TCONS_00007992	9.02185	-0.986487	0.710788	-1.38788	0.165174	0.325414	A0A0H5QS37	Uncharacterized protein
TCONS_00013360	4.14249	0.789538	0.791114	0.998008	0.318276	0.495892	A0A0H5QS37	Uncharacterized protein
TCONS_00008285	6.13524	0.789242	0.699837	1.12775	0.259425	0.433698	A0A0H5QS46	Uncharacterized protein
TCONS_00007346	66.1674	-0.358634	0.385943	-0.92924	0.352765	0.529195	A0A0H5QS70	Uncharacterized protein (Fragment)
TCONS_00005210	5.65763	-0.335776	0.70121	-0.478852	0.632044	0.764996	A0A0H5QS76	Uncharacterized protein
TCONS_00005142	12.8017	0.795063	0.673776	1.18001	0.237996	0.411358	A0A0H5QS78	Uncharacterized protein
TCONS_00008257	22.3987	0.0780099	0.46447	0.167955	0.866619	0.923219	A0A0H5QS79	Uncharacterized protein (Fragment)
TCONS_00006498	88.0144	-0.48423	0.410584	-1.17937	0.238251	0.411593	A0A0H5QS86	Uncharacterized protein
TCONS_00010906	5.82192	1.18856	0.69445	1.71152	0.0869858	0.214175	A0A0H5QS96	DUF676 domain-containing protein
TCONS_00008228	73.9123	-0.612599	0.387175	-1.58223	0.113598	0.256198	A0A0H5QS96	DUF676 domain-containing protein
TCONS_00007889	6.46288	0.483351	0.749165	0.645187	0.518806	0.67705	A0A0H5QSB3	TPH domain-containing protein
TCONS_00005382	88.7464	-0.879084	0.406235	-2.16398	0.0304657	0.108324	A0A0H5QSB4	Uncharacterized protein
TCONS_00009172	16.3211	-0.846694	0.559482	-1.51335	0.13019	0.279319	A0A0H5QSC5	Uncharacterized protein
TCONS_00000434	11.9603	2.73209	0.680319	4.0159	5.92189e-05	0.00167787	A0A0H5QSD0	SHR-BD domain-containing protein (Fragment)
TCONS_00005149	25.1449	0.349508	0.622002	0.561909	0.574178	0.72206	A0A0H5QSD2	Uncharacterized protein
TCONS_00015637	138.512	-0.393093	0.34503	-1.1393	0.254578	0.429731	A0A0H5QSE5	Uncharacterized protein (Fragment)
TCONS_00006204	25.2191	1.75846	0.632118	2.78185	0.00540502	0.0354922	A0A0H5QSH1	Avl9 domain-containing protein
TCONS_00006205	17.1521	1.24337	0.649528	1.91427	0.0555857	0.160543	A0A0H5QSH1	Avl9 domain-containing protein
TCONS_00009274	25.958	-0.412646	0.513928	-0.802926	0.422017	0.595103	A0A0H5QSI5	Uncharacterized protein (Fragment)
TCONS_00001273	28.7869	0.118001	0.577339	0.204387	0.838051	0.904372	A0A0H5QSJ9	Uncharacterized protein (Fragment)
TCONS_00005572	11.8375	-0.20806	0.579392	-0.359101	0.71952	0.8266	A0A0H5QSK0	Cysteine dioxygenase (EC 1.13.11.20)
TCONS_00007839	52.1321	-0.897354	0.463786	-1.93484	0.0530094	0.155553	A0A0H5QSK8	Uncharacterized protein (Fragment)
TCONS_00008253	4.8183	-0.376165	0.771758	-0.487413	0.625965	0.762026	A0A0H5QSL2	Uncharacterized protein (Fragment)
TCONS_00007697	35.0692	1.33178	0.533275	2.49736	0.0125122	0.0612399	A0A0H5QSL4	Uncharacterized protein (Fragment)
TCONS_00004798	227.861	0.647485	0.424333	1.52589	0.127037	0.274995	A0A0H5QSL5	Reelin domain-containing protein
TCONS_00014309	13.3785	-1.15376	0.599635	-1.92411	0.0543414	0.158005	A0A0H5QSL8	Uncharacterized protein (Fragment)
TCONS_00008034	47.714	1.31861	0.537097	2.45508	0.0140854	0.0663098	A0A0H5QSM1	EGF-like domain-containing protein
TCONS_00008035	4.57673	0.724131	0.72982	0.992206	0.321097	0.498457	A0A0H5QSM1	EGF-like domain-containing protein
TCONS_00015630	179.837	0.740175	0.37144	1.99272	0.0462924	0.142453	A0A0H5QSM4	GH16 domain-containing protein
TCONS_00000433	8.60113	0.955622	0.749539	1.27495	0.202328	0.370289	A0A0H5QSM5	Uncharacterized protein (Fragment)
TCONS_00008676	142.332	1.44596	0.361521	3.99965	6.34354e-05	0.00176277	A0A0H5QSN0	Uncharacterized protein (Fragment)
TCONS_00013488	4.13124	-0.608365	0.803017	-0.757599	0.448691	0.619232	A0A0H5QSN2	Myb_DNA-bind_3 domain-containing protein
TCONS_00007479	10.8262	-0.423772	0.604161	-0.701422	0.48304	0.649202	A0A0H5QSN2	Myb_DNA-bind_3 domain-containing protein
TCONS_00016031	15.8991	-0.132123	0.547129	-0.241484	0.80918	0.88533	A0A0H5QSN3	Uncharacterized protein (Fragment)
TCONS_00003614	34.9618	-0.8132	0.416987	-1.95018	0.0511548	0.151911	A0A0H5QSP6	Uncharacterized protein
TCONS_00012022	9.84055	-0.199282	0.600576	-0.331819	0.740026	0.840197	A0A0H5QSQ8	Uncharacterized protein (Fragment)
TCONS_00006947	60.0934	-0.188721	0.419397	-0.449981	0.652724	0.779843	A0A0H5QSR0	Uncharacterized protein
TCONS_00005400	66.2003	2.01115	0.557454	3.60774	0.000308877	0.00480281	A0A0H5QSS1	Uncharacterized protein
TCONS_00015830	12.5281	-0.143732	0.58902	-0.244019	0.807216	0.884066	A0A0H5QSS2	Uncharacterized protein
TCONS_00016745	82.3597	-0.937291	0.348523	-2.68933	0.00715966	0.0429243	A0A0H5QSS3	ANK_REP_REGION domain-containing protein (Fragment)
TCONS_00005468	128.59	0.83058	0.401687	2.06773	0.0386654	0.126563	A0A0H5QSS7	TPR_REGION domain-containing protein (Fragment)
TCONS_00003538	75.5231	-0.363697	0.372626	-0.976037	0.329046	0.506989	A0A0H5QST0	Uncharacterized protein
TCONS_00014810	65.1812	0.330403	0.413378	0.799275	0.424131	0.596434	A0A0H5QSU5	JmjC domain-containing protein (Fragment)
TCONS_00013408	43.4105	1.61356	0.50317	3.20679	0.00134223	0.0132609	A0A0H5QSU7	Uncharacterized protein
TCONS_00007290	225.485	0.718519	0.405766	1.77077	0.0765986	0.197428	A0A0H5QSV8	Uncharacterized protein (Fragment)
TCONS_00002604	5.60625	-0.21861	0.749639	-0.29162	0.770577	0.859629	A0A0H5QSX2	Autophagy_act_C domain-containing protein
TCONS_00015017	6.89032	1.53134	0.804605	1.90322	0.0570117	0.163534	A0A0H5QSX9	Uncharacterized protein (Fragment)
TCONS_00002211	225.232	-0.14507	0.27958	-0.518885	0.603841	0.744102	A0A0H5QSY7	Uncharacterized protein
TCONS_00002516	12.7936	0.79826	0.698748	1.14241	0.253282	0.428579	A0A0H5QSY8	Uncharacterized protein (Fragment)
TCONS_00007425	4.07742	-0.46333	0.768011	-0.603285	0.546319	0.699354	A0A0H5QSZ2	DNA_MISMATCH_REPAIR_2 domain-containing protein
TCONS_00016960	12.7533	1.45459	0.61934	2.34861	0.0188434	0.0787005	A0A0H5QSZ8	MULE domain-containing protein (Fragment)
TCONS_00015096	11.4405	-1.0014	0.603752	-1.65862	0.0971916	0.230554	A0A0H5QSZ8	MULE domain-containing protein (Fragment)
TCONS_00003742	102.852	0.36931	0.342227	1.07914	0.280526	0.457769	A0A0H5QSZ8	MULE domain-containing protein (Fragment)
TCONS_00014324	5.6246	-0.643529	0.689478	-0.933357	0.350636	0.527505	A0A0H5QSZ8	MULE domain-containing protein (Fragment)
TCONS_00016484	29.2106	-0.328677	0.429724	-0.764855	0.444358	0.615599	A0A0H5QSZ8	MULE domain-containing protein (Fragment)
TCONS_00014892	9.86752	0.369792	0.616613	0.599714	0.548697	0.701341	A0A0H5QSZ8	MULE domain-containing protein (Fragment)
TCONS_00014881	4.63897	0.00542988	0.767879	0.00707127	0.994358	0.997487	A0A0H5QSZ8	MULE domain-containing protein (Fragment)
[truncated: 5,427 more rows]

## Sheet: Sig
GeneID	Base mean	log2(FC)	StdErr	Wald-Stats	P-value	P-adj	Protein ID
[truncated: 1,377 more rows]

## Sheet: Annotate sig
GeneID	Base mean	log2(FC)	StdErr	Wald-Stats	P-value	P-adj	Protein ID	Protein name
[truncated: 1,151 more rows]

[truncated: 2 more sheets: Up, Down]
