# Supplementary material for: In Planta Transcriptome and Proteome Profiles of Spongospora subterranea in Resistant and Susceptible Host Environments Illuminates Regulatory Principles Underlying Host–Pathogen Interaction
Source: Biology (Basel). 2021 Aug 28;10(9):840. doi: 10.3390/biology10090840 (PMC8471823; doi:10.3390/biology10090840)
Supplement: Supplementary file 1 [file biology-10-00840-s001.zip › Table S4- List of identified and differentially expressed proteins.xlsx]

## Sheet: All
Protein ID	Protein Descriptions
A0A0H5R9V4	Uncharacterized protein (Fragment)
A0A0H5QQ41	Uncharacterized protein (Fragment)
A0A0H5RDW9	Uncharacterized protein
A0A0H5RUC1	Uncharacterized protein (Fragment)
A0A0H5QK37	Uncharacterized protein (Fragment)
A0A0H5QNZ2	Meth_synt_2 domain-containing protein
A0A0H5QI54	Uncharacterized protein
A0A0H5R774	Uncharacterized protein (Fragment)
A0A0H5R6W3	Uncharacterized protein
A0A0H5R5J8	S-adenosylmethionine synthase (EC 2.5.1.6) (Fragment)
A0A0H5QSM4	GH16 domain-containing protein
A0A0H5RB70	Uncharacterized protein (Fragment)
A0A0H5R6P1	Phosphoenolpyruvate carboxykinase (GTP) (EC 4.1.1.32) (Fragment)
A0A0H5QJF8	Uncharacterized protein (Fragment)
A0A0H5RJ84	Peptidyl-prolyl cis-trans isomerase (PPIase) (EC 5.2.1.8) (Fragment)
A0A0H5QIP5	H(+)-transporting two-sector ATPase (EC 7.1.2.2)
A0A0H5R4R4	Proteasome subunit alpha type
A0A0H5R4L7	PKS_ER domain-containing protein
A0A0H5R6J1	Uncharacterized protein (Fragment)
A0A0H5R549	Proteasome subunit beta
A0A0H5QLS8	5-methyltetrahydropteroyltriglutamate--homocysteine S-methyltransferase (EC 2.1.1.14) (Fragment)
A0A0H5RJS9	Proteasome subunit beta
A0A0H5R5U0	Ferritin (EC 1.16.3.1) (Fragment)
A0A0H5R512	Fructose-bisphosphate aldolase (EC 4.1.2.13)
A0A0H5RC51	Uncharacterized protein
A0A0H5R6J2	Fumarate hydratase (EC 4.2.1.2) (Fragment)
A0A0H5RJQ5	Proteasome subunit beta
A0A0H5RCH5	NodB homology domain-containing protein
A0A0H5QNE0	Nucleoside diphosphate kinase (EC 2.7.4.6)
A0A0H5R5B4	Proteasome subunit alpha type
A0A0H5RKB4	Proteasome subunit beta
A0A0H5R4T7	Proteasome subunit beta
A0A0H5R7A6	Uncharacterized protein
A0A0H5R6N9	Isocitrate dehydrogenase [NADP] (EC 1.1.1.42)
A0A0H5R4M5	Ribosomal protein
A0A0H5R568	Proteasome subunit alpha type
A0A0H5RAY7	4-hydroxyphenylpyruvate dioxygenase
A0A0H5RCU8	Uncharacterized protein
A0A0H5R877	Phosphoacetylglucosamine mutase (PAGM) (EC 5.4.2.3) (Acetylglucosamine phosphomutase) (N-acetylglucosamine-phosphate mutase)
A0A0H5R6A8	Dihydrolipoyl dehydrogenase (EC 1.8.1.4)
A0A0H5R5T6	Proteasome subunit alpha type (Fragment)
A0A0H5R6J9	Malate synthase (EC 2.3.3.9)
A0A0H5R455	Tubulin_C domain-containing protein (Fragment)
A0A096XTV6	ATP synthase subunit alpha
A0A0H5R4Q2	ATP synthase subunit beta (EC 7.1.2.2)
A0A0H5R593	Aldo_ket_red domain-containing protein
A0A0H5RJV7	UV excision repair protein RAD23
A0A0H5R5D3	M20_dimer domain-containing protein (Fragment)
A0A0H5R4R0	Histone H2B (Fragment)
A0A0H5RC42	Phosphoglycerate mutase (2,3-diphosphoglycerate-independent) (EC 5.4.2.12)
A0A0H5QS67	Histone H4
A0A0H5RJV1	Glutathione reductase (EC 1.8.1.7)
A0A0H5QZP3	Uncharacterized protein (Fragment)
A0A0H5QQB9	Glucose-6-phosphate isomerase (EC 5.3.1.9)
A0A0H5RJU9	Fumarylacetoacetase (EC 3.7.1.2) (Fumarylacetoacetate hydrolase)
A0A0H5R7P0	Glucose-6-phosphate 1-epimerase (EC 5.1.3.15) (Fragment)
A0A0H5RK73	Uncharacterized protein
A0A0H5QV51	Glutamate dehydrogenase
A0A0H5R8D9	Seryl-tRNA synthetase (EC 6.1.1.11) (Fragment)
A0A0H5QI72	Ribosomal_L7Ae domain-containing protein
A0A0H5R3Y5	Ribosomal_S13_N domain-containing protein
A0A0H5R4P2	Uncharacterized protein (Fragment)
A0A0H5R3X2	40S ribosomal protein S7 (Fragment)
A0A0H5R5G7	RanBD1 domain-containing protein (Fragment)
A0A0H5R406	S10_plectin domain-containing protein (Fragment)
A0A0H5R7U7	Aminopeptidase (EC 3.4.11.-) (Fragment)
A0A0H5RLV2	Dipeptidyl aminopeptidase III (EC 3.4.14.4) (Dipeptidyl peptidase III) (Fragment)
A0A0H5RCX2	Uncharacterized protein (Fragment)
A0A0H5R4N8	Ribosomal_S7 domain-containing protein (Fragment)
A0A0H5R4Y8	60S acidic ribosomal protein P0
A0A0H5RJI7	WD_REPEATS_REGION domain-containing protein
A0A0H5R519	Uncharacterized protein
Q6SR52	Actin (Fragment)
A0A0H5R4M9	Uncharacterized protein (Fragment)
A0A0H5QPW7	Tubulin beta chain (Fragment)
A0A0H5R3U4	CS domain-containing protein
A0A0H5RJH9	40S ribosomal protein S4
A0A0H5R4D2	Uncharacterized protein (Fragment)
A0A0H5R428	Superoxide dismutase [Cu-Zn] (EC 1.15.1.1)
A0A0H5R4P6	Uncharacterized protein (Fragment)
Q6SR53	Polyubiquitin 2 (Fragment)
A0A0H5R3P0	Uncharacterized protein
A0A0H5R4X0	Uncharacterized protein (Fragment)
A0A0H5R3T2	Adenosylhomocysteinase (EC 3.3.1.1)
A0A0H5RJN2	Transketolase (EC 2.2.1.1)
A0A0H5QLQ1	Histone H2A
A0A0H5R4H7	Ribosomal_S17_N domain-containing protein (Fragment)
A0A0H5R3Y0	Ribosomal_L16 domain-containing protein
A0A0H5RJJ9	Ribosomal_L23eN domain-containing protein (Fragment)
A0A0H5R3R2	Uncharacterized protein
A0A0H5RJD5	Uncharacterized protein (Fragment)
A0A0H5R4R7	40S ribosomal protein S8 (Fragment)
A0A0H5R4J9	Uncharacterized protein (Fragment)
A0A0H5QI53	60S ribosomal protein L36
A0A0H5R4X9	Uncharacterized protein
A0A0H5R3W2	Uncharacterized protein (Fragment)
A0A0H5R4Q3	Ornithine aminotransferase (EC 2.6.1.13)
A0A0H5R3V8	Uncharacterized protein (Fragment)
A0A0H5R3N6	Ribosomal_L28e domain-containing protein (Fragment)
A0A0H5R3T9	Uncharacterized protein (Fragment)
A0A0H5R4K8	Tr-type G domain-containing protein
A0A0H5R448	Uncharacterized protein (Fragment)
A0A0H5R3M8	Tubulin alpha chain
A0A0H5R3Q5	Uncharacterized protein
A0A0H5QFW6	Uncharacterized protein
A0A0H5R4U4	Uncharacterized protein (Fragment)
A0A0H5R7I5	Malate dehydrogenase (EC 1.1.1.37) (Fragment)
A0A0H5RJG3	Uncharacterized protein
A0A0H5R3J3	Ribosomal_L18e/L15P domain-containing protein (Fragment)
A0A0H5R3P7	S4 RNA-binding domain-containing protein (Fragment)
A0A0H5RJ90	Uncharacterized protein (Fragment)
A0A0H5QLH5	Uncharacterized protein
A0A0H5RJ95	Uncharacterized protein (Fragment)
A0A0H5QYG3	Uncharacterized protein (Fragment)
A0A0H5R4K2	Uncharacterized protein
A0A0H5RF18	Uncharacterized protein (Fragment)
A0A0H5R3K8	Uncharacterized protein

## Sheet: DEPs
Protein ID	Protein Descriptions	FC	FDR (-log)
A0A0H5QI54	Uncharacterized protein	3.1446	3.00922
A0A0H5QJF8	Uncharacterized protein (Fragment)	3.04477	1.9359
A0A0H5RAY7	4-hydroxyphenylpyruvate dioxygenase	2.60179	1.33566
A0A0H5QNZ2	Meth_synt_2 domain-containing protein	2.26634	1.84493
A0A0H5RUC1	Uncharacterized protein (Fragment)	2.11356	1.69499
A0A0H5QK37	Uncharacterized protein (Fragment)	1.86999	1.65445
A0A0H5R774	Uncharacterized protein (Fragment)	1.8691	1.04261
A0A0H5QQ41	Uncharacterized protein (Fragment)	1.83051	2.08692
A0A0H5R9V4	Uncharacterized protein (Fragment)	1.73058	1.43455
A0A0H5R6W3	Uncharacterized protein	1.6196	1.15196
A0A0H5R455	Tubulin_C domain-containing protein (Fragment)	1.60783	0.7376
A0A0H5R4L7	PKS_ER domain-containing protein	1.57628	1.54107
A0A0H5RCH5	NodB homology domain-containing protein	1.52702	1.29413
A0A0H5R4T7	Proteasome subunit beta	1.52492	1.69315
A0A0H5R6J1	Uncharacterized protein (Fragment)	1.43625	1.49085
A0A0H5RCU8	Uncharacterized protein	1.41148	1.05541
A0A0H5RB70	Uncharacterized protein (Fragment)	1.40837	1.41292
A0A0H5R5J8	S-adenosylmethionine synthase (EC 2.5.1.6) (Fragment)	1.37197	1.14728
A0A0H5QLS8	5-methyltetrahydropteroyltriglutamate--homocysteine S-methyltransferase (EC 2.1.1.14) (Fragment)	1.37127	1.3332
A0A0H5R877	Phosphoacetylglucosamine mutase (PAGM) (EC 5.4.2.3) (Acetylglucosamine phosphomutase) (N-acetylglucosamine-phosphate mutase)	1.3585	1.3605
A0A0H5R3T9	Uncharacterized protein (Fragment)	1.33052	1.21959
A0A0H5R519	Uncharacterized protein	1.29594	1.22154
A0A0H5R7I5	Malate dehydrogenase (EC 1.1.1.37) (Fragment)	1.29525	1.20493
A0A0H5RC51	Uncharacterized protein	1.25909	1.0176
A0A0H5RJ84	Peptidyl-prolyl cis-trans isomerase (PPIase) (EC 5.2.1.8) (Fragment)	1.16603	1.00665
A0A0H5QSM4	GH16 domain-containing protein	1.09013	1.26023
A0A0H5QIP5	H(+)-transporting two-sector ATPase (EC 7.1.2.2)	1.03346	0.811465
A0A0H5R6P1	Phosphoenolpyruvate carboxykinase (GTP) (EC 4.1.1.32) (Fragment)	0.920912	0.860045
A0A0H5R549	Proteasome subunit beta	0.91667	1.0214
A0A0H5QNE0	Nucleoside diphosphate kinase (EC 2.7.4.6)	0.834958	1.01293
A0A0H5QQB9	Glucose-6-phosphate isomerase (EC 5.3.1.9)	0.769871	1.72934
A0A0H5RKB4	Proteasome subunit beta	0.707103	0.912781
A0A0H5R6J2	Fumarate hydratase (EC 4.2.1.2) (Fragment)	0.690663	3.73138
A0A096XTV6	ATP synthase subunit alpha	0.316182	1.36202
A0A0H5R3P7	S4 RNA-binding domain-containing protein (Fragment)	-0.791541	0.94666
A0A0H5R3T2	Adenosylhomocysteinase (EC 3.3.1.1)	-0.876507	1.3107
A0A0H5R4Q3	Ornithine aminotransferase (EC 2.6.1.13)	-0.989539	1.18229
A0A0H5QFW6	Uncharacterized protein	-1.07811	3.38917
A0A0H5RJ90	Uncharacterized protein (Fragment)	-1.12793	1.0276
A0A0H5QYG3	Uncharacterized protein (Fragment)	-1.46576	1.30507
A0A0H5R4K2	Uncharacterized protein	-1.66801	1.78599
A0A0H5R3K8	Uncharacterized protein	-2.50955	2.30666
