# Supplementary material for: In Planta Transcriptome and Proteome Profiles of Spongospora subterranea in Resistant and Susceptible Host Environments Illuminates Regulatory Principles Underlying Host–Pathogen Interaction
Source: Biology (Basel). 2021 Aug 28;10(9):840. doi: 10.3390/biology10090840 (PMC8471823; doi:10.3390/biology10090840)
Supplement: Supplementary file 1 [file biology-10-00840-s001.zip › Table S6- List of identified proteins in our transcriptome database.xlsx]

## Sheet: Sheet1
GeneID	Annotation Id	Protein
TCONS_00000089	Q42434	Luminal-binding protein (BiP) (78 kDa glucose-regulated protein homolog) (GRP-78)
TCONS_00000173	Q8WQI5	40S ribosomal protein S8
TCONS_00000232	P49448	Glutamate dehydrogenase 2, mitochondrial (GDH 2) (EC 1.4.1.3)
TCONS_00000328	P05214	Tubulin alpha-3 chain (Alpha-tubulin 3/7) (Alpha-tubulin isotype M-alpha-3/7) (Tubulin alpha-3/alpha-7 chain) [Cleaved into: Detyrosinated tubulin alpha-3 chain]
TCONS_00000633	O65050	60S ribosomal protein L15-1
TCONS_00000662	O42249	Guanine nucleotide-binding protein subunit beta-2-like 1 (Receptor of activated protein kinase C) (RACK)
TCONS_00001347	P49693	60S ribosomal protein L19-3
TCONS_00001787	O57592	60S ribosomal protein L7a (Surfeit locus protein 3)
TCONS_00002082	P62829	60S ribosomal protein L23 (60S ribosomal protein L17) (Large ribosomal subunit protein uL14)
TCONS_00002866	P35007	Adenosylhomocysteinase (AdoHcyase) (EC 3.3.1.1) (S-adenosyl-L-homocysteine hydrolase)
TCONS_00002946	P09189	Heat shock cognate 70 kDa protein
TCONS_00003500	P59232	Ubiquitin-40S ribosomal protein S27a-2 [Cleaved into: Ubiquitin; 40S ribosomal protein S27a-2]
TCONS_00003672	P04255	Histone H2B 1
TCONS_00003954	Q9U7D0	Histone H4
TCONS_00004862	P46436	Glutathione S-transferase 1 (EC 2.5.1.18) (GST class-sigma)
TCONS_00005627	Q9M5M6	60S ribosomal protein L30
TCONS_00006062	P35684	60S ribosomal protein L3
TCONS_00006304	Q9LHQ5	Probable histone H2A.2 (HTA13)
TCONS_00006798	Q8W171	Peptidyl-prolyl cis-trans isomerase 1 (PPIase 1) (EC 5.2.1.8) (Cyclophilin 1) (Cyclosporin A-binding protein 1) (Rotamase 1)
TCONS_00006863	Q9SPB3	60S ribosomal protein L10 (QM protein homolog)
TCONS_00006971	P37399	ATP synthase subunit beta, mitochondrial (EC 7.1.2.2)
TCONS_00007524	Q08682	40S ribosomal protein Sa-1 (Laminin receptor homolog) (p40)
TCONS_00007773	Q9LR33	60S ribosomal protein L27a-2
TCONS_00008563	A2XLF2	Actin-1
TCONS_00008595	A0A0H5RVN0	Kazal-like domain-containing protein (Fragment)
TCONS_00009543	Q0J006	Proteasome subunit alpha type-7-B (20S proteasome alpha subunit D-2) (20S proteasome subunit alpha-4-B)
TCONS_00009605	P52427	Proteasome subunit alpha type-4 (20S proteasome alpha subunit C) (20S proteasome subunit alpha-3) (Proteasome 27 kDa subunit)
TCONS_00010312	Q42971	Enolase (EC 4.2.1.11) (2-phospho-D-glycerate hydro-lyase) (2-phosphoglycerate dehydratase) (OSE1)
TCONS_00010427	A8HS48	40S ribosomal protein S3a
TCONS_00010459	Q8RW90	Fumarylacetoacetase (EC 3.7.1.2) (Fumarylacetoacetate hydrolase) (AtFAH) (Protein SHORT-DAY SENSITIVE CELL DEATH 1)
TCONS_00010679	P49210	60S ribosomal protein L9
TCONS_00010754	A0A0H5R4U4	Uncharacterized protein (Fragment)
TCONS_00011277	Q9ZNS1	40S ribosomal protein S7
TCONS_00011386	O24534	Elongation factor 1-alpha (EF-1-alpha)
TCONS_00011451	Q9M2F1	40S ribosomal protein S27-2
TCONS_00012016	A0A0H5R774	Uncharacterized protein (Fragment)
TCONS_00012033	O23712	Proteasome subunit alpha type-1-B (20S proteasome alpha subunit F-2) (Proteasome component 2B) (Proteasome subunit alpha type-6)
TCONS_00012154	Q9ZVQ4	Glutathione S-transferase Z2 (AtGSTZ2) (EC 2.5.1.18) (GST class-zeta member 2)
TCONS_00013180	Q9LDQ7	S-adenosylmethionine synthase (AdoMet synthase) (EC 2.5.1.6) (Methionine adenosyltransferase) (MAT)
TCONS_00013770	O04386	Tubulin beta chain (Beta-tubulin)
TCONS_00013804	A0A0H5RUC1	Uncharacterized protein (Fragment)
TCONS_00014253	P46295	40S ribosomal protein S14
TCONS_00014441	A0A0H5R3K8	Uncharacterized protein
TCONS_00016153	P42791	60S ribosomal protein L18-2
